# Supplementary material for: The Spalt Transcription Factors Generate the Transcriptional Landscape of the Drosophila melanogaster Wing Pouch Central Region
Source: PubMed Central journal article supplement (PMC4524721; doi:10.1371/journal.pgen.1005370), 2015-08-04
Supplement: pgen.1005370.s018.pdf [file pgen.1005370.s018.pdf]

**Spalt +**

| Name               | Symbol         | logFC (48) | adj.P.Val (48) | logFC (24) | adj.P.Val (24) | cDNA/PCR | In situ | Human            |
|--------------------|----------------|------------|----------------|------------|----------------|----------|---------|------------------|
| <b>Age 24h/48h</b> |                |            |                |            |                |          |         |                  |
| CG1058             | <i>rpk</i>     | -1,20      | 2,50E-05       | 0,99       | 6,11E-04       | PCR      | P-      | ASIC5            |
| CG10965            | <i>Corp</i>    | -1,04      | 1,29E-08       | 0,43       | 5,12E-03       | GH26991  | U+      |                  |
| CG11086            | <i>Gadd45</i>  | -2,06      | 5,86E-11       | 1,63       | 6,99E-09       | RH70774  | U+      | GADD45A,B,G      |
| CG11155            | <i>CG11155</i> | -1,01      | 1,33E-05       | 0,71       | 2,11E-03       | PCR      | N=      | GRIK1-5          |
| CG11584            | <i>CG11584</i> | -2,84      | 1,79E-13       | 2,18       | 3,37E-11       | PCR      | U-      | POR2AF1          |
| CG11897            | <i>CG11897</i> | -1,22      | 1,37E-06       | 0,95       | 5,08E-03       | PCR      | U+      | ABCC1-3,5,6,8-12 |
| CG12177            | <i>CG12177</i> | -1,09      | 5,14E-05       | 0,72       | 9,37E-03       | RE18811  | U=      |                  |
| CG1221             | <i>miple</i>   | -1,26      | 1,51E-10       | 1,04       | 4,18E-08       | RH10518  | U-      |                  |
| CG12224            | <i>CG12224</i> | -2,18      | 7,11E-09       | 1,73       | 7,21E-07       | PCR      | U=      |                  |
| CG12367            | <i>Hen1</i>    | -1,45      | 7,16E-09       | 1,07       | 1,12E-06       | PCR      | U=      | HENMT1           |
| CG13041            | <i>CG13041</i> | -1,10      | 1,17E-05       | 0,57       | 2,70E-02       | RE40431  | U=      |                  |
| CG13679            | <i>CG13679</i> | -1,08      | 2,43E-03       | 1,08       | 4,20E-03       | RE17113  | U-      |                  |
| CG13937            | <i>CG13937</i> | -1,44      | 1,96E-06       | 1,28       | 2,45E-05       | PCR      | U-      | CHST8-14         |
| CG14907            | <i>CG14907</i> | -1,22      | 9,08E-08       | 0,52       | 1,09E-02       | LD37858  | N+      |                  |
| CG1512             | <i>Cul-2</i>   | -1,53      | 6,05E-12       | 0,44       | 2,87E-03       | LD36177  | U+      | CUL2             |
| CG15400            | <i>CG15400</i> | -1,04      | 1,59E-05       | 0,98       | 6,31E-05       | PCR      | U-      | G6PC3/G6PC       |
| CG15784            | <i>CG15784</i> | -3,98      | 2,06E-11       | 3,31       | 9,87E-10       | PCR      | P+      |                  |
| CG15892            | <i>CG15892</i> | -1,91      | 8,40E-13       | 1,80       | 6,31E-12       | PCR      | U=      |                  |
| CG16857            | <i>CG16857</i> | -1,17      | 7,89E-04       | 1,09       | 2,80E-03       | GH01205  | U=      |                  |
| CG17104            | <i>CG17104</i> | -1,09      | 1,63E-07       | 0,47       | 1,42E-02       | PCR      | P+      |                  |
| CG17530            | <i>GstE6</i>   | -3,53      | 3,03E-12       | 1,37       | 5,03E-05       | RE21095  | N+      | GSTT2-2B         |
| CG17533            | <i>GstE8</i>   | -2,03      | 3,34E-09       | 1,47       | 1,51E-06       | PCR      | U+      | GSTT2-2B         |
| CG17574            | <i>CG17574</i> | -1,09      | 3,81E-06       | 0,55       | 2,30E-04       | RH03863  | U=      |                  |
| CG17803            | <i>CG17803</i> | -1,34      | 7,23E-06       | 1,19       | 7,46E-05       | PCR      | N=      | ZBTB39/ZNF462    |
| CG18188            | <i>Damm</i>    | -1,89      | 5,28E-09       | 1,56       | 1,61E-07       | PCR      | U=      | CASP1,3-7        |
| CG18278            | <i>CG18278</i> | -0,99      | 4,96E-06       | 1,00       | 9,89E-06       | PCR      | U=      | GNS              |

**Spalt +**

| Name               | Symbol          | logFC (48) | adj.P.Val (48) | logFC (24) | adj.P.Val (24) | cDNA/PCR | In situ | Human                  |
|--------------------|-----------------|------------|----------------|------------|----------------|----------|---------|------------------------|
| <b>Age 24h/48h</b> |                 |            |                |            |                |          |         |                        |
| CG18455            | <i>Optix</i>    | -1,17      | 5,33E-07       | 1,20       | 7,58E-07       | LD05472  | P+      | SIX3,6                 |
| CG1851             | <i>Ady43A</i>   | -1,14      | 5,28E-09       | 0,97       | 1,67E-07       | PCR      | U+      | ADK                    |
| CG18522            | <i>CG18522</i>  | -3,82      | 5,97E-11       | 1,46       | 5,23E-04       | LD37006  | N+      | XDH                    |
| CG18543            | <i>mtrm</i>     | -1,03      | 9,80E-08       | 0,67       | 1,39E-04       | LD47919  | U=      |                        |
| CG2184             | <i>Mlc2</i>     | -0,93      | 1,83E-02       | 1,12       | 7,83E-03       | PCR      | N=      | MYL 2,5,7,9,10,12A,12B |
| CG2560             | <i>Cpr11A</i>   | -1,05      | 8,10E-05       | 0,56       | 4,27E-02       | RE57452  | U=      |                        |
| CG2909             | <i>CG2909</i>   | -1,27      | 3,74E-07       | 0,57       | 1,55E-02       | RE54994  | U+      |                        |
| CG2914             | <i>Ets21C</i>   | -1,12      | 7,01E-09       | 0,41       | 1,23E-02       | PCR      | U-      | ERG/ERF                |
| CG3074             | <i>Swim</i>     | -1,91      | 1,74E-06       | 0,79       | 4,96E-02       | PCR      | U+      | TINAG/TINAGL1          |
| CG3081             | <i>CG3081</i>   | -2,55      | 2,59E-09       | 1,67       | 5,68E-06       | PCR      | U=      |                        |
| CG31332            | <i>Unc-115b</i> | -1,52      | 1,29E-02       | 1,42       | 3,52E-02       | SD03267  | U=      | ABLIM1-3               |
| CG31875            | <i>CG31875</i>  | -1,09      | 3,10E-06       | 0,75       | 8,65E-04       | PCR      | U=      | RCOR1-3                |
| CG32475            | <i>mthl8</i>    | -1,65      | 7,80E-09       | 1,57       | 3,93E-08       | LP02895  | U=      | ELTD1/EMR1-3           |
| CG32581            | <i>CG32581</i>  | -1,22      | 7,79E-05       | 1,25       | 1,05E-04       | GH14055  | U=      | RNF185                 |
| CG32625            | <i>CG32625</i>  | -3,04      | 4,12E-11       | 0,75       | 2,61E-02       | PCR      | U+      | GTSF1/GTSF1L           |
| CG32788            | <i>Crg-1</i>    | -1,89      | 5,97E-11       | 0,74       | 1,35E-02       | PCR      | U=      |                        |
| CG33048            | <i>Mocs1</i>    | -1,02      | 6,44E-06       | 0,70       | 1,58E-03       | PCR      | U+      | MOCS1                  |
| CG33653            | <i>Caps</i>     | -1,77      | 7,01E-09       | 1,13       | 1,65E-04       | GH07283  | U=      | CADPS/CADPS2           |
| CG3397             | <i>CG3397</i>   | -2,20      | 5,85E-10       | 1,48       | 1,06E-06       | PCR      | U=      |                        |
| CG34002            | <i>CG34002</i>  | -2,30      | 1,46E-06       | 1,04       | 2,68E-02       | PCR      | U-      |                        |
| CG3448             | <i>CG3448</i>   | -1,41      | 4,36E-09       | 0,66       | 7,87E-04       | RE59279  | U+      |                        |
| CG3568             | <i>CG3568</i>   | -0,62      | 2,08E-02       | 1,10       | 1,33E-04       | AT21585  | U=      |                        |
| CG40300            | <i>ago-03</i>   | -1,21      | 4,23E-06       | 0,92       | 3,94E-04       | PCR      | N=      | PIWIL2                 |
| CG40452            | <i>Snap25</i>   | -1,42      | 3,45E-06       | 0,61       | 4,98E-02       | PCR      | N=      | SNAP23,25              |
| CG4174             | <i>CG4174</i>   | -1,55      | 2,82E-08       | 0,91       | 1,40E-05       | PCR      | U=      | P4HA1-3                |
| CG42516            | <i>CG42516</i>  | -1,01      | 1,76E-06       | 0,97       | 1,74E-04       | PCR      | U-      | GTF3C6                 |

**Spalt +**

| Name               | Symbol            | logFC (48) | adj.P.Val (48) | logFC (24) | adj.P.Val (24) | cDNA/PCR | In situ | Human            |
|--------------------|-------------------|------------|----------------|------------|----------------|----------|---------|------------------|
| <b>Age 24h/48h</b> |                   |            |                |            |                |          |         |                  |
| CG42644            | CG42644           | -3,71      | 2,78E-16       | 3,23       | 6,77E-15       | AT14183  | N=      | NEGR1/LSAMP      |
| CG43144            | CG43144           | -3,26      | 8,47E-15       | 1,84       | 3,45E-10       | PCR      | N+      |                  |
| CG43646            | CG43646           | -1,50      | 3,51E-07       | 1,22       | 1,79E-05       | PCR      | U=      |                  |
| CG43676            | CG43676           | -1,55      | 2,57E-09       | 1,31       | 8,51E-08       | PCR      | N=      |                  |
| CG4594             | CG4594            | -3,06      | 2,21E-11       | 2,96       | 7,33E-11       | PCR      | U-      | ECI1             |
| CG4920             | <i>ea</i>         | -1,01      | 1,54E-04       | 1,07       | 1,28E-04       | RE55124  | U=      | TPSG1/TPSAB1     |
| CG5022             | CG5022            | -1,25      | 2,32E-05       | 1,32       | 2,29E-05       | RE05264  | U=      | FRMD3,5          |
| CG5096             | CG5096            | -2,26      | 7,04E-09       | 2,19       | 2,21E-08       | RE59088  | U+      | SLITRK1,3-5      |
| CG5229             | <i>chm</i>        | -2,12      | 1,15E-07       | 1,75       | 5,38E-06       | PCR      | U-      | KAT7             |
| CG5966             | CG5966            | -1,19      | 1,17E-05       | 0,66       | 1,60E-02       | LD47264  | P=      |                  |
| CG6658             | <i>Ugt86Di</i>    | -1,53      | 1,14E-09       | 1,21       | 1,48E-07       | PCR      | P+      | UGT1A10          |
| CG6665             | CG6665            | -1,40      | 1,55E-09       | 1,23       | 2,87E-08       | SD03555  | U=      | C1orf43          |
| CG6794             | <i>Dif</i>        | -1,96      | 4,74E-08       | 1,12       | 4,00E-04       | RE18723  | U+      | REL/RELA,B       |
| CG6912             | CG6912            | -1,87      | 1,63E-07       | 1,76       | 1,06E-06       | LD45181  | U=      |                  |
| CG7035             | <i>Chp80</i>      | -1,17      | 1,28E-07       | 1,13       | 4,70E-07       | LD31211  | U=      | NCBP1            |
| CG7590             | <i>scyl</i>       | -0,95      | 3,61E-02       | 1,22       | 1,17E-02       | PCR      | U+      | DDIT4/DDIT4L     |
| CG7787             | CG7787            | -1,05      | 5,06E-05       | 0,86       | 1,05E-03       | RE45155  | U=      | RABIF            |
| CG8573             | <i>su(Hw)</i>     | -1,02      | 9,02E-09       | 1,03       | 1,58E-08       | PCR      | U=      | ZNF443/ZNF678    |
| CG8620             | CG8620            | -3,54      | 2,50E-13       | 0,92       | 9,84E-04       | RH55750  | U-      |                  |
| CG8799             | <i>l(2)03659</i>  | -1,56      | 1,28E-07       | 0,99       | 2,43E-04       | PCR      | U=      | ABCC1-3,5,6,8-12 |
| CG9214             | <i>Tob</i>        | -1,81      | 4,20E-05       | 1,16       | 9,79E-03       | PCR      | U=      | TOB1-2           |
| <b>Age 48h</b>     |                   |            |                |            |                |          |         |                  |
| CG10160            | <i>ImpL3</i>      | -1,18      | 4,61E-03       | -----      | -----          | -----    | -----   | LDHA-C/LDHAL6A,B |
| CG10245            | <i>Cyp6a20</i>    | -1,90      | 3,06E-10       | -----      | -----          | -----    | -----   |                  |
| CG1155             | <i>Osi14</i>      | -1,44      | 5,40E-05       | -----      | -----          | LD24139  | P=      |                  |
| CG11592            | <i>Amnionless</i> | -1,10      | 9,16E-03       | -----      | -----          | -----    | -----   | AMN              |

**Spalt+**

| Name           | Symbol         | logFC (48) | adj.P.Val (48) | logFC (24) | adj.P.Val (24) | cDNA/PCR | In situ | Human              |
|----------------|----------------|------------|----------------|------------|----------------|----------|---------|--------------------|
| <b>Age 48h</b> |                |            |                |            |                |          |         |                    |
| CG12242        | <i>GstD5</i>   | -4,15      | 9,59E-14       | -----      | -----          | -----    | -----   |                    |
| CG12505        | <i>Arc1</i>    | -3,91      | 4,31E-09       | -----      | -----          | LD41905  | N+      |                    |
| CG12846        | <i>Tsp42Ed</i> | -1,95      | 2,82E-08       | -----      | -----          | -----    | -----   | TSPAN7/CD63        |
| CG12908        | <i>Ndg</i>     | -1,26      | 1,68E-07       | -----      | -----          | -----    | -----   |                    |
| CG1299         | <i>CG1299</i>  | -1,07      | 2,60E-06       | -----      | -----          | -----    | -----   | TPSG1/TPSAB1       |
| CG13060        | <i>CG13060</i> | -1,25      | 7,94E-05       | -----      | -----          | -----    | -----   |                    |
| CG13941        | <i>Arc2</i>    | -1,55      | 2,61E-06       | -----      | -----          | -----    | -----   |                    |
| CG14059        | <i>Ilp8</i>    | -4,55      | 3,55E-08       | -----      | -----          | -----    | -----   |                    |
| CG14196        | <i>CG14196</i> | -1,30      | 9,96E-04       | -----      | -----          | -----    | -----   | SLC16A1,3,5,7,8,12 |
| CG14304        | <i>CG14304</i> | -1,09      | 1,54E-04       | -----      | -----          | -----    | -----   |                    |
| CG14545        | <i>CG14545</i> | -1,85      | 2,21E-10       | -----      | -----          | -----    | -----   |                    |
| CG14695        | <i>CG14695</i> | -1,46      | 6,54E-08       | -----      | -----          | -----    | -----   |                    |
| CG15209        | <i>CG15209</i> | -1,08      | 1,61E-03       | -----      | -----          | -----    | -----   |                    |
| CG15347        | <i>CG15347</i> | -2,15      | 1,29E-04       | -----      | -----          | -----    | -----   |                    |
| CG15623        | <i>c-cup</i>   | -1,25      | 1,19E-05       | -----      | -----          | -----    | -----   | CYB5D2             |
| CG18859        | <i>Or19a</i>   | -2,14      | 5,80E-08       | -----      | -----          | -----    | -----   |                    |
| CG2065         | <i>CG2065</i>  | -1,35      | 3,41E-04       | -----      | -----          | -----    | -----   | RDH11              |
| CG2885         | <i>RabX2</i>   | -2,13      | 6,54E-10       | -----      | -----          | -----    | -----   | RAB10,12           |
| CG30196        | <i>CG30196</i> | -1,73      | 1,53E-05       | -----      | -----          | PCR      | N+      |                    |
| CG31062        | <i>side</i>    | -1,19      | 4,27E-07       | -----      | -----          | -----    | -----   |                    |
| CG31279        | <i>CG31279</i> | -2,50      | 5,95E-12       | -----      | -----          | -----    | -----   |                    |
| CG32825        | <i>Or19b</i>   | -1,76      | 1,58E-07       | -----      | -----          | -----    | -----   |                    |
| CG34031        | <i>CG34031</i> | -1,08      | 1,93E-02       | -----      | -----          | -----    | -----   |                    |
| CG34165        | <i>CG34165</i> | -1,23      | 3,45E-09       | -----      | -----          | -----    | -----   |                    |
| CG3767         | <i>Jhl-26</i>  | -2,23      | 3,06E-10       | -----      | -----          | -----    | -----   |                    |
| CG4181         | <i>GstD2</i>   | -2,46      | 1,55E-08       | -----      | -----          | -----    | -----   |                    |

**Spalt +**

| Name           | Symbol         | logFC (48) | adj.P.Val (48) | logFC (24) | adj.P.Val (24) | cDNA/PCR | In situ | Human           |
|----------------|----------------|------------|----------------|------------|----------------|----------|---------|-----------------|
| <b>Age 48h</b> |                |            |                |            |                |          |         |                 |
| CG42255        | CG42255        | -1,50      | 2,89E-02       | -----      | -----          | -----    | -----   | CUBN            |
| CG42352        | <i>Ir40a</i>   | -2,02      | 1,01E-10       | -----      | -----          | -----    | -----   | GRIK1-4/GRID1,2 |
| CG42363        | CG42363        | -1,25      | 4,75E-03       | -----      | -----          | -----    | -----   |                 |
| CG4373         | <i>Cyp6d2</i>  | -1,81      | 4,33E-04       | -----      | -----          | RE31155  | U       |                 |
| CG4423         | <i>GstD6</i>   | -1,85      | 3,45E-09       | -----      | -----          | -----    | -----   |                 |
| CG5955         | CG5955         | -2,70      | 8,47E-15       | -----      | -----          | -----    | -----   |                 |
| CG6042         | <i>Cyp12a4</i> | -1,17      | 9,84E-04       | -----      | -----          | -----    | -----   |                 |
| CG6142         | CG6142         | -1,14      | 1,81E-02       | -----      | -----          | -----    | -----   | CHDH            |
| CG7080         | CG7080         | -1,16      | 1,19E-04       | -----      | -----          | PCR      | P-      |                 |
| CG7356         | <i>Tg</i>      | -1,27      | 1,41E-06       | -----      | -----          | -----    | -----   | TGM1-7          |
| CG8927         | CG8927         | -2,11      | 1,29E-08       | -----      | -----          | -----    | -----   |                 |
| CG9521         | CG9521         | -1,01      | 2,49E-04       | -----      | -----          | -----    | -----   | CHDH            |
| CG9877         | CG9877         | -1,33      | 1,11E-02       | -----      | -----          | -----    | -----   |                 |
| <b>Age 24h</b> |                |            |                |            |                |          |         |                 |
| CG11486        | CG11486        | -----      | -----          | 0,90       | 3,38E-02       | PCR      | U=      | PAN3            |
| CG13316        | <i>Mnt</i>     | -----      | -----          | 0,90       | 3,86E-02       | GH28809  | U-      | MNT             |
| CG30059        | CG30059        | -----      | -----          | 1,01       | 2,35E-05       | SD03412  | U=      | POLR3A          |
| CG32019        | <i>bt</i>      | -----      | -----          | 1,18       | 5,27E-03       | GH07636  | N=      | PALLD/IGFN1     |
| CG45050        | CG43674        | -----      | -----          | 0,95       | 2,15E-02       | PCR      | U+      |                 |
| CG6544         | <i>fau</i>     | -----      | -----          | 1,27       | 4,17E-02       | HL07933  | U=      |                 |
| CG7178         | <i>wupA</i>    | -----      | -----          | 1,31       | 2,16E-02       | PCR      | N=      | TNNI1-3         |
| CG8663         | <i>nrv3</i>    | -----      | -----          | 1,26       | 2,13E-03       | RH24769  | N=      | ATP1B1-4        |

**Spalt +**

Df//UAS

| Name    | Symbol        | Genotype |       |       |       | cDNA/PCR | In situ | Human                      |
|---------|---------------|----------|-------|-------|-------|----------|---------|----------------------------|
| CG10102 | CR10102/Arc3  | UAS      | ----- | ----- | ----- | PCR      | N+      |                            |
| CG10916 | CG10916       | Df//UAS  | ----- | ----- | ----- | LD46221  | U+      | TRAIP                      |
| CG1303  | agt           | Df//UAS  | ----- | ----- | ----- | PCR      | U+      |                            |
| CG14121 | (3)S147910/ve | Df//UAS  | ----- | ----- | ----- | PCR      | U+      |                            |
| CG15009 | ImpL2         | UAS      | ----- | ----- | ----- | SD07266  | P+      | IGSF9-B                    |
| CG16928 | mre11         | Df//UAS  | ----- | ----- | ----- | PCR      | N+      | MRE11A                     |
| CG18213 | CG18213       | Df//UAS  | ----- | ----- | ----- | LD11102  | N+      | SMYD1-4                    |
| CG1925  | mus205        | Df       | ----- | ----- | ----- | PCR      | U+      | POLD1/KIAA2022/POLA1/REV3L |
| CG2999  | unc-13        | Df//UAS  | ----- | ----- | ----- | PCR      | P+      | UNC13A-C                   |
| CG3008  | CG3008        | UAS      | ----- | ----- | ----- | RE33807  | U+      | RIOK1-3                    |
| CG31705 | CG31705       | UAS      | ----- | ----- | ----- | GH07269  | U+      |                            |
| CG32021 | CG32021       | Df//UAS  | ----- | ----- | ----- | SD15619  | N+      |                            |
| CG5202  | escl          | UAS      | ----- | ----- | ----- | SD02661  | U+      | EED                        |
| CG5247  | lrpb          | UAS      | ----- | ----- | ----- | RE28533  | U+      | XRCC6                      |
| CG6272  | CG6272        | Df//UAS  | ----- | ----- | ----- | GH10915  | N+      | CEBPA-B-D-E-G              |

**Spalt -**

| Name        | Symbol   | logFC (48) | adj.P.Val (48) | logFC (24) | adj.P.Val (24) | cDNA/PCR | In situ | Human   |
|-------------|----------|------------|----------------|------------|----------------|----------|---------|---------|
| Age 24h/48h |          |            |                |            |                |          |         |         |
| CG10344     | CG10344  | 1,10       | 2,79E-04       | -1,12      | 4,32E-04       | AT16443  | U=      | ZDHHC24 |
| CG10539     | S6k      | 1,03       | 1,95E-05       | -0,70      | 3,63E-03       | RE65159  | U=      | RPS6KB1 |
| CG10541     | Tektin-C | 4,93       | 1,49E-13       | -5,10      | 1,95E-13       | AT25102  | U=      | TEKT3-5 |
| CG10576     | CG10576  | 1,16       | 5,83E-07       | -1,22      | 5,02E-07       | PCR      | P-      | PA2G4   |

**Spalt -**

| Name               | Symbol  | logFC (48) | adj.P.Val (48) | logFC (24) | adj.P.Val (24) | cDNA/PCR | In situ | Human         |
|--------------------|---------|------------|----------------|------------|----------------|----------|---------|---------------|
| <b>Age 24h/48h</b> |         |            |                |            |                |          |         |               |
| CG11253            | CG11253 | 1,05       | 1,02E-04       | -1,11      | 4,86E-05       | AT27448  | U=      | ZMYND10       |
| CG11263            | CG11263 | 0,85       | 1,43E-06       | -1,03      | 1,42E-07       | PCR      | U-      | EXD1          |
| CG12182            | CG12182 | 1,07       | 8,01E-10       | -0,96      | 1,24E-08       | GH02340  | U-      |               |
| CG12275            | RpS10a  | 1,08       | 4,35E-05       | -0,43      | 3,28E-02       | LD32148  | U=      | RSP10         |
| CG12843            | Tsp42Ei | 1,27       | 1,76E-06       | -0,87      | 6,92E-04       | RE08220  | P-      | TSPAN18/CD53  |
| CG13083            | CG13083 | 1,54       | 6,09E-08       | -1,31      | 1,84E-06       | PCR      | U-      |               |
| CG1342             | Spn100A | 1,46       | 1,48E-03       | -1,44      | 2,83E-03       | LP03106  | P-      | SERPINA-I     |
| CG13890            | CG13890 | 1,07       | 1,42E-08       | -1,28      | 1,21E-09       | PCR      | U-      | CYD1-2B       |
| CG13897            | CG13897 | 1,05       | 2,23E-05       | -1,17      | 9,97E-06       | RE38876  | U-      |               |
| CG14394            | NijC    | 2,63       | 4,94E-13       | -2,34      | 8,12E-12       | PCR      | U-      | NINJ1-2       |
| CG14485            | swi2    | 0,65       | 4,96E-02       | -1,05      | 2,49E-03       | PCR      | U-      |               |
| CG14715            | CG14715 | 1,67       | 5,97E-11       | -1,84      | 2,37E-11       | RH50927  | U=      | FKBP2,7,9,14  |
| CG15236            | CG15236 | 1,33       | 3,49E-07       | -1,74      | 7,22E-09       | RE34115  | U=      |               |
| CG15707            | krimp   | 1,50       | 9,07E-05       | -1,79      | 1,51E-05       | LD30829  | U=      | TDRD7,1,6,15  |
| CG17077            | pnt     | 1,18       | 9,37E-07       | -1,26      | 6,35E-07       | PCR      | U=      | ETS1,2        |
| CG2161             | Rga     | 1,07       | 5,42E-06       | -1,19      | 1,96E-06       | GM14102  | U=      | CNOT2         |
| CG2849             | Rala    | 2,99       | 1,49E-13       | -3,04      | 1,95E-13       | LD21679  | U=      | RALA/RALB     |
| CG30104            | CG30104 | 1,04       | 2,89E-02       | -1,54      | 2,16E-03       | LP01187  | U-      | NT5E          |
| CG30488            | CG30488 | 1,37       | 4,75E-10       | -1,47      | 3,00E-10       | PCR      | U=      |               |
| CG31262            | CG31262 | 1,05       | 5,17E-04       | -1,12      | 2,61E-03       | PCR      | U=      | SLC5A5,6,8,12 |
| CG31436            | CG31436 | 2,60       | 5,86E-11       | -2,99      | 8,50E-12       | PCR      | U-      |               |
| CG31809            | CG31809 | 1,57       | 2,57E-10       | -1,76      | 6,96E-11       | RE06583  | N=      | HSDL1-17B     |
| CG31810            | CG31810 | 1,31       | 7,16E-09       | -1,54      | 8,12E-10       | RE06583  | N=      | HSDL1-17B     |
| CG32364            | CG32364 | 1,81       | 8,14E-09       | -2,31      | 2,36E-10       | PCR      | U-      |               |
| CG33140            | CG33140 | 1,61       | 1,63E-08       | -1,43      | 2,93E-07       | PCR      | U=      |               |
| CG33302            | Cpr31A  | 1,14       | 1,60E-05       | -1,46      | 6,35E-07       | PCR      | U-      |               |

**Spalt -**

| Name               | Symbol          | logFC (48) | adj.P.Val (48) | logFC (24) | adj.P.Val (24) | cDNA/PCR | In situ | Human               |
|--------------------|-----------------|------------|----------------|------------|----------------|----------|---------|---------------------|
| <b>Age 24h/48h</b> |                 |            |                |            |                |          |         |                     |
| CG34215            | CG34215         | 2,87       | 3,04E-09       | -2,83      | 5,81E-09       | PCR      | U=      |                     |
| CG3649             | CG3649          | 1,50       | 1,43E-06       | -1,61      | 9,25E-07       | PCR      | P=      | SLC17A1-5/SLC37A1-2 |
| CG40178            | CG40178         | 1,17       | 4,59E-08       | -1,14      | 1,53E-07       | PCR      | U=      | DNAJC16             |
| CG4086             | <i>Su(P)</i>    | 1,74       | 1,04E-07       | -1,58      | 1,11E-06       | RH17614  | U=      | PTGES2              |
| CG41320            | CG41320         | 1,35       | 9,32E-07       | -1,28      | 4,37E-06       | PCR      | U-      | DNAJC16             |
| CG42330            | <i>Dscam4</i>   | 3,84       | 8,40E-13       | -3,66      | 5,59E-12       | PCR      | U-      | MANY                |
| CG43079            | <i>nrm</i>      | 1,34       | 2,22E-06       | -1,13      | 1,32E-05       | PCR      | P=      | HL05969             |
| CG43103            | CG43103         | 2,02       | 3,22E-06       | -1,84      | 2,54E-05       | PCR      | U=      |                     |
| CG43117            | CG43117         | 1,34       | 3,67E-07       | -1,19      | 4,98E-05       | PCR      | U-      |                     |
| CG4570             | CG4570          | 1,82       | 7,09E-08       | -2,15      | 8,91E-09       | PCR      | U-      | SLC40A1             |
| CG5671             | <i>Pten</i>     | 4,00       | 4,75E-12       | -4,00      | 8,50E-12       | PCR      | U=      | PTEN                |
| CG6013             | CG6013          | 1,04       | 1,86E-06       | -1,18      | 5,02E-07       | GH10002  | P-      | CCDC124             |
| CG7160             | <i>Cpr78E</i>   | 1,88       | 8,30E-03       | -1,47      | 4,06E-02       | LP06027  | U-      |                     |
| CG7354             | <i>mRpS26</i>   | 0,69       | 1,28E-02       | -1,04      | 4,34E-04       | RE31184  | U=      | MRPS26              |
| CG7478             | <i>Act79B</i>   | 1,29       | 5,54E-08       | -1,26      | 1,59E-07       | GH04529  | U-      | ACT A1-C1           |
| CG7532             | <i>l(2)34Fc</i> | 0,94       | 2,07E-03       | -1,63      | 2,91E-06       | RE60882  | U-      |                     |
| CG7607             | CG7607          | 1,54       | 2,84E-07       | -1,61      | 2,98E-07       | RH68451  | U=      | CDON/BOC/TMIGD1     |
| CG7916             | CG7916          | 1,06       | 5,15E-04       | -0,83      | 1,00E-02       | RE38722  | U=      |                     |
| CG8023             | <i>eIF4E-3</i>  | 1,39       | 3,09E-07       | -1,35      | 1,10E-06       | PCR      | U-      | EIF4E               |
| CG8768             | CG8768          | 1,07       | 3,10E-06       | -0,98      | 2,20E-05       | PCR      | U-      | SDR39U1             |
| CG9333             | <i>Oseg5</i>    | 2,42       | 1,80E-09       | -2,34      | 4,67E-10       | PCR      | U-      | IFT80               |
| <b>Age 48h</b>     |                 |            |                |            |                |          |         |                     |
| CG11051            | <i>Nplp2</i>    | 1,31       | 4,82E-02       | -----      | -----          | -----    | -----   |                     |
| CG14332            | CG14332         | 2,07       | 4,57E-02       | -----      | -----          | -----    | -----   |                     |
| CG17876            | <i>Amy-d</i>    | 1,26       | 4,42E-02       | -----      | -----          | -----    | -----   | AMY1B-2B            |
| CG18363            | <i>dic-04</i>   | 1,19       | 2,52E-02       | -----      | -----          | -----    | -----   | SLC25A10            |



**Spalt -**

| Name           | Symbol  | logFC (48) | adj.P.Val (48) | logFC (24) | adj.P.Val (24) | cDNA/PCR | In situ | Human        |
|----------------|---------|------------|----------------|------------|----------------|----------|---------|--------------|
| <b>Age 48h</b> |         |            |                |            |                |          |         |              |
| CG33126        | NLaz    | 1,27       | 1,08E-02       | -----      | -----          | -----    | -----   | APOD         |
| CG42798        | CG42798 | 1,91       | 2,12E-02       | -----      | -----          | -----    | -----   |              |
| CG42834        | CG42834 | 2,27       | 1,70E-02       | -----      | -----          | -----    | -----   |              |
| CG9486         | CG9486  | 1,50       | 1,45E-02       | -----      | -----          | -----    | -----   |              |
| <b>Age 24h</b> |         |            |                |            |                |          |         |              |
| CG13053        | CG13053 | -----      | -----          | -1,07      | 2,40E-03       | LP04080  | U-      |              |
| CG17134        | CG17134 | -----      | -----          | -1,10      | 1,12E-02       | PCR      | U-      | REN          |
| CG2360         | Ccp84Aa | -----      | -----          | -1,02      | 4,56E-02       | RH13984  | U=      |              |
| CG3200         | Reg-2   | -----      | -----          | -0,99      | 8,01E-03       | PCR      | U-      | HDHD3        |
| CG32444        | CG32444 | -----      | -----          | -1,12      | 4,32E-03       | PCR      | U-      | GALM         |
| CG43114        | CG43114 | -----      | -----          | -0,95      | 4,23E-02       | PCR      | U-      |              |
| CG6579         | atilla  | -----      | -----          | -0,92      | 1,18E-02       | PCR      | N=      |              |
| CG8800         | CG8800  | -----      | -----          | -1,01      | 2,73E-02       |          | U=      | DNAL1/LRRC61 |
| <b>Df//UAS</b> |         |            |                |            |                |          |         |              |
| Name           | Symbol  | Genotype   |                |            |                | cDNA/PCR | In situ | Human        |
| CG10041        | CG10041 | UAS        | -----          | -----      | -----          | PCR      | U-      |              |
| CG10225        | RanBP3  | Df         | -----          | -----      | -----          | PCR      | U-      | RANBP3-3L    |
| CG10382        | wrapper | UAS        | -----          | -----      | -----          | PCR      | U-      | NEGR1/LSAMP  |
| CG11212        | Ptr     | UAS        | -----          | -----      | -----          | PCR      | U-      | PTCHD4,1     |
| CG11357        | CG11357 | Df         | -----          | -----      | -----          | PCR      | U-      | B3GALT5,1,2  |
| CG11607        | H2.0    | UAS        | -----          | -----      | -----          | RE37758  | U-      | HLX          |
| CG11797        | Obp56a  | UAS        | -----          | -----      | -----          | PCR      | U-      |              |
| CG11883        | CG11883 | UAS        | -----          | -----      | -----          | PCR      | U-      | NT5E         |
| CG12052        | lola    | UAS        | -----          | -----      | -----          | PCR      | U-      |              |

**Spalt -****Df//UAS**

| <b>Name</b>    | <b>Symbol</b>    | <b>Genotype</b> |       |       |       | <b>cDNA/PCR</b> | <b>In situ</b> | <b>Human</b>           |
|----------------|------------------|-----------------|-------|-------|-------|-----------------|----------------|------------------------|
| <i>CG12256</i> | <i>CG12256</i>   | UAS             | ----- | ----- | ----- | PCR             | U-             | KLK1-5,7,8,11,12,14    |
| <i>CG12287</i> | <i>pdm2</i>      | UAS             | ----- | ----- | ----- | PCR             | U-             | HDX/POU2F1-3           |
| <i>CG1273</i>  | <i>CG1273</i>    | UAS             | ----- | ----- | ----- | RE03558         | P-             | FNDC1/ABI3BP           |
| <i>CG12952</i> | <i>sage</i>      | Df              | ----- | ----- | ----- | PCR             | U-             | MESP1-2/MSGN1          |
| <i>CG13618</i> | <i>CG13618</i>   | UAS             | ----- | ----- | ----- | RE08075         | U-             |                        |
| <i>CG13848</i> | <i>pinta</i>     | Df//UAS         | ----- | ----- | ----- | PCR             | U-             | TTPAL                  |
| <i>CG14590</i> | <i>CG14590</i>   | UAS             | ----- | ----- | ----- | PCR             | U-             | SMYD1-4                |
| <i>CG14869</i> | <i>CG6107</i>    | Df              | ----- | ----- | ----- | PCR             | U-             | ADAMTS1-5,8,9,14,15,20 |
| <i>CG15369</i> | <i>CG15369</i>   | Df              | ----- | ----- | ----- | IP05946         | U-             |                        |
| <i>CG15739</i> | <i>CG15739</i>   | Df              | ----- | ----- | ----- | PCR             | U-             |                        |
| <i>CG16705</i> | <i>SPE</i>       | Df              | ----- | ----- | ----- | GH28857         | U-             |                        |
| <i>CG16712</i> | <i>CG16712</i>   | Df              | ----- | ----- | ----- | RH38008         | U-             | TFPI2/WFDC8            |
| <i>CG16756</i> | <i>CG16756</i>   | Df              | ----- | ----- | ----- | PCR             | U-             | LYZL1,2,4,6            |
| <i>CG16947</i> | <i>CG16947</i>   | Df//UAS         | ----- | ----- | ----- | PCR             | U-             | RCHY1                  |
| <i>CG1725</i>  | <i>dlg1</i>      | Df              | ----- | ----- | ----- | PCR             | U-             | DLG1-4                 |
| <i>CG1763</i>  | <i>nod</i>       | UAS             | ----- | ----- | ----- | PCR             | U-             | KIF11                  |
| <i>CG1780</i>  | <i>ldgf4</i>     | Df//UAS         | ----- | ----- | ----- | PCR             | U-             | OVGP1/CHIT1            |
| <i>CG18024</i> | <i>SoxN</i>      | Df              | ----- | ----- | ----- | PCR             | U-             | SOX1-3,14,15,24        |
| <i>CG18255</i> | <i>Strn-Mlck</i> | Df              | ----- | ----- | ----- | PCR             | U-             | NEXN                   |
| <i>CG18410</i> | <i>Ude</i>       | UAS             | ----- | ----- | ----- | PCR             | U-             |                        |
| <i>CG18657</i> | <i>NetA</i>      | UAS             | ----- | ----- | ----- | PCR             | P-             | NTN1,3/MEGF8           |
| <i>CG1869</i>  | <i>Cht7</i>      | Df              | ----- | ----- | ----- | LD45559         | P-             | OVGP1/CHIT1/CHHI3L1,2  |
| <i>CG2056</i>  | <i>spirit</i>    | Df              | ----- | ----- | ----- | PCR             | U-             |                        |
| <i>CG2488</i>  | <i>phr6-4</i>    | Df              | ----- | ----- | ----- | PCR             | U-             |                        |
| <i>CG2706</i>  | <i>fs(1)Yb</i>   | Df//UAS         | ----- | ----- | ----- | PCR             | U-             |                        |

**Spalt -**

## Df//UAS

| Name    | Symbol           | Genotype |       |       |       | cDNA/PCR | In situ | Human                   |
|---------|------------------|----------|-------|-------|-------|----------|---------|-------------------------|
| CG30069 | CG30069          | Df       | ----- | ----- | ----- | LP06813  | P-      | POLR3A                  |
| CG3097  | CG3097           | UAS      | ----- | ----- | ----- | RE43153  | U-      | CPO/CPA2-4,6/CPB1,2     |
| CG3100  | <i>b6</i>        | UAS      | ----- | ----- | ----- | PCR      | U-      |                         |
| CG31098 | CG10634          | Df//UAS  | ----- | ----- | ----- | PCR      | U-      |                         |
| CG31721 | <i>Trim9</i>     | UAS      | ----- | ----- | ----- | RE22018  | P-      |                         |
| CG31764 | <i>vir-1</i>     | Df//UAS  | ----- | ----- | ----- | GH02216  | P-      |                         |
| CG31839 | <i>nimB2</i>     | Df       | ----- | ----- | ----- | PCR      | U-      |                         |
| CG31884 | <i>Trx-2</i>     | UAS      | ----- | ----- | ----- | SD03042  | U-      | TXNDC8,2/TXN            |
| CG32029 | <i>Cpr66D</i>    | Df//UAS  | ----- | ----- | ----- | RE57183  | U-      |                         |
| CG32055 | CG32055          | Df//UAS  | ----- | ----- | ----- | PCR      | P-      | LRRN4CL/LRRN4/ISLR      |
| CG32261 | <i>Gr64a</i>     | UAS      | ----- | ----- | ----- | PCR      | U-      |                         |
| CG3240  | <i>Rad1</i>      | Df       | ----- | ----- | ----- | PCR      | U-      | RAD1                    |
| CG32491 | <i>mod(mdg4)</i> | Df       | ----- | ----- | ----- | PCR      | U-      |                         |
| CG3289  | <i>Ptpa</i>      | Df       | ----- | ----- | ----- | PCR      | U-      | PPP2R4                  |
| CG33197 | <i>mbl</i>       | Df//UAS  | ----- | ----- | ----- | RE67734  | U-      |                         |
| CG33960 | <i>Sema-2b</i>   | UAS      | ----- | ----- | ----- | PCR      | U-      | SEMA4A-D,F,G            |
| CG33970 | CG33970          | UAS      | ----- | ----- | ----- | GH14066  | P-      |                         |
| CG34406 | CG44002          | UAS      | ----- | ----- | ----- | PCR      | U-      |                         |
| CG42614 | <i>scrib</i>     | UAS      | ----- | ----- | ----- | PCR      | U-      |                         |
| CG4322  | <i>moody</i>     | UAS      | ----- | ----- | ----- | RE06985  | U-      |                         |
| CG4379  | <i>Pka-C1</i>    | UAS      | ----- | ----- | ----- | PCR      | U-      | PRKX/PRKACG,B,A/PRKG1,2 |
| CG4398  | CG4398           | UAS      | ----- | ----- | ----- | PCR      | U-      |                         |
| CG4432  | <i>PGRP-LC</i>   | Df       | ----- | ----- | ----- | PCR      | U-      | PGLYRP1-4               |
| CG4565  | CG4565           | UAS      | ----- | ----- | ----- | PCR      | U-      | SETDB1,2/ASH1L/EHMT1    |
| CG5249  | <i>Blimp-1</i>   | UAS      | ----- | ----- | ----- | PCR      | U-      |                         |
| CG6134  | <i>spz</i>       | Df       | ----- | ----- | ----- | PCR      | U-      |                         |

Spalt -

## Df//UAS

| Name   | Symbol         | Genotype |       |       |       | cDNA/PCR | In situ | Human                  |
|--------|----------------|----------|-------|-------|-------|----------|---------|------------------------|
| CG6713 | <i>Nos</i>     | Df       | ----- | ----- | ----- | PCR      | U-      | NOS1-3                 |
| CG7201 | CG7201         | UAS      | ----- | ----- | ----- | PCR      | P-      |                        |
| CG7420 | CG7420         | Df       | ----- | ----- | ----- | PCR      | U-      |                        |
| CG7577 | <i>ppk20</i>   | Df//UAS  | ----- | ----- | ----- | PCR      | U-      | ASIC5                  |
| CG7734 | <i>shn</i>     | UAS      | ----- | ----- | ----- | PCR      | U-      | HIVEP1-3/ZNF831        |
| CG7897 | <i>gp210</i>   | Df       | ----- | ----- | ----- | PCR      | U-      |                        |
| CG7906 | CG7906         | Df       | ----- | ----- | ----- | PCR      | U-      |                        |
| CG8084 | <i>ana</i>     | UAS      | ----- | ----- | ----- | GH07389  | P-      |                        |
| CG8589 | <i>tej</i>     | UAS      | ----- | ----- | ----- | PCR      | U-      | AKAP1                  |
| CG8675 | CG8675         | Df       | ----- | ----- | ----- | LD08644  | U-      | C9orf85                |
| CG8773 | CG8773         | UAS      | ----- | ----- | ----- | PCR      | U-      | ENPEP                  |
| CG8780 | <i>tey</i>     | UAS      | ----- | ----- | ----- | PCR      | U-      | RNF220                 |
| CG8945 | CG8945         | Df       | ----- | ----- | ----- | PCR      | U-      | CPO/CPA2-4,6/CPB1,2    |
| CG9355 | <i>dy</i>      | UAS      | ----- | ----- | ----- | LP04610  | U-      |                        |
| CG9460 | <i>Spn42De</i> | Df       | ----- | ----- | ----- | PCR      | U-      | SERPINC1/SERPINB1-13   |
| CG9850 | CG11169        | Df//UAS  | ----- | ----- | ----- | LP02257  | P-      | ADAMTS1-5,8,9,14,15,20 |
