# Supplementary material for: The Spalt Transcription Factors Generate the Transcriptional Landscape of the Drosophila melanogaster Wing Pouch Central Region
Source: PubMed Central journal article supplement (PMC4524721; doi:10.1371/journal.pgen.1005370), 2015-08-04
Supplement: pgen.1005370.s020.pdf [file pgen.1005370.s020.pdf]

**Spalt +**

| Name               | Symbol        | RNAi strain | Phenotype  | Molecular                                             | Molecular |
|--------------------|---------------|-------------|------------|-------------------------------------------------------|-----------|
| <b>Age 24h/48h</b> |               |             |            |                                                       |           |
| CG1058             | <i>rpk</i>    | 1058R-1     | +          | Ligand-gated sodium channel                           | Neu       |
| CG10965            | <i>Corp</i>   | 102751-KK   | wS         | Apoptotic signaling pathway in response to DNA damage | CD        |
| CG11086            | <i>Gadd45</i> | BL-35023    | +          | JNK cascade                                           | CS        |
| CG11155            | CG11155       | BL-31991    | +          | Glutamate receptor                                    | Neu       |
| CG11584            | CG11584       | -----       | -----      | -----                                                 | CG        |
| CG11897            | CG11897       | 28260-GD    | +          | ABC transporter                                       | Tra       |
| CG12177            | CG12177       | 17018-GD    | +          | Inosine/uridine-preferring nucleoside hydrolase       | M         |
| CG1221             | <i>miple</i>  | 1221R-1     | +          | Pleiotrophin/Midkine heparin-binding growth factor    | CS        |
| CG12224            | CG12224       | 26497-GD    | +          | Oxidoreductase                                        | RedOx     |
| CG12367            | <i>Hen1</i>   | 31920-GD    | +          | RNA methylation                                       | R         |
| CG13041            | CG13041       | 109222-KK   | S-P//S-P   | Retinin-like                                          | CGh       |
| CG13679            | CG13679       | 49149-GD    | V+/S       | -----                                                 | CG        |
| CG13937            | CG13937       | 3373-GD     | +          | Carbohydrate sulfotransferase                         | M         |
| CG14907            | CG14907       | 39851-GD    | +          | -----                                                 | CG        |
| CG1512             | <i>Cul-2</i>  | 100540-KK   | sS         | Ubiquitin protein ligase                              | P         |
| CG15400            | CG15400       | 7261-GD     | +          | Glucose-6-phosphatase                                 | M         |
| CG15784            | CG15784       | 15784R-3    | nW/sN//S-P | -----                                                 | CG        |
| CG15892            | CG15892       | BL-42945    | +          | -----                                                 | CG        |
| CG16857            | CG16857       | BL-31974    | +          | Fibronectin, type III; Immunoglobulin I-set           | CA        |
| CG17104            | CG17104       | 17104R-3    | +          | -----                                                 | CG        |
| CG17530            | <i>GstE6</i>  | 17530R-1    | +          | Glutathione S-transferase                             | RedOx     |
| CG17533            | <i>GstE8</i>  | 26497-GD    | PL-nW//S   | Glutathione transferase                               | RedOx     |
| CG17574            | CG17574       | 102094-KK   | +          | -----                                                 | CG        |
| CG17803            | CG17803       | BL-29367    | +          | C2H2-type/integrase DNA-binding domain                | D         |
| CG18188            | <i>Damm</i>   | 109520-KK   | sF//+      | Cysteine-type endopeptidase                           | P         |
| CG18278            | CG18278       | BL-28520    | +          | N-acetylglucosamine-6-sulfatase                       | M         |

***Spalt +***

| Name               | Symbol          | RNAi strain | Phenotype | Molecular                              | Molecular |
|--------------------|-----------------|-------------|-----------|----------------------------------------|-----------|
| <b>Age 24h/48h</b> |                 |             |           |                                        |           |
| <i>CG18455</i>     | <i>Optix</i>    | 18455R-2    | S-P       | Sequence-specific DNA binding          | D         |
| <i>CG1851</i>      | <i>Ady43A</i>   | 33133-GD    | +         | Carbohydrate kinase PfkB               | M         |
| <i>CG18522</i>     | <i>CG18522</i>  | 100330-KK   | +         | Oxidoreductase                         | RedOx     |
| <i>CG18543</i>     | <i>mtrm</i>     | BL-35430    | +         | Meiotic cell cycle                     | CDiv      |
| <i>CG2184</i>      | <i>Mlc2</i>     | BL-36694    | EPL//S-P  | Microfilament motor                    | Cyt       |
| <i>CG2560</i>      | <i>Cpr11A</i>   | 103321-KK   | V+        | Cuticle                                | Cut       |
| <i>CG2909</i>      | <i>CG2909</i>   | 100165-KK   | V+        | -----                                  | CG        |
| <i>CG2914</i>      | <i>Ets21C</i>   | 106153-KK   | +         | DNA binding transcription factor       | D         |
| <i>CG3074</i>      | <i>Swim</i>     | BL-36591    | +         | Wnt-protein binding                    | CS        |
| <i>CG3081</i>      | <i>CG3081</i>   | 102507-KK   | sF//+     | -----                                  | CG        |
| <i>CG31332</i>     | <i>Unc-115b</i> | BL-40839    | +         | Actin binding                          | Cyt       |
| <i>CG31875</i>     | <i>CG31875</i>  | 104638-KK   | +         | Chromatin binding                      | D         |
| <i>CG32475</i>     | <i>mth18</i>    | 4071-GD     | +         | G-protein coupled receptor signaling   | CS        |
| <i>CG32581</i>     | <i>CG32581</i>  | 49728-GD    | EPL//S-P  | Zinc finger, RING-type                 | CGh       |
| <i>CG32625</i>     | <i>CG32625</i>  | 103216-KK   | +         | CHHC zinc finger                       | CGh       |
| <i>CG32788</i>     | <i>Crg-1</i>    | BL-46971    | +         | Sequence-specific DNA binding          | D         |
| <i>CG33048</i>     | <i>Mocs1</i>    | -----       | -----     | Mo-molybdopterin cofactor biosynthetic | M         |
| <i>CG33653</i>     | <i>Caps</i>     | BL-31984    | +         | Phospholipid binding                   | Neu       |
| <i>CG3397</i>      | <i>CG3397</i>   | BL-25818    | +         | Oxidoreductase                         | RedOx     |
| <i>CG34002</i>     | <i>CG34002</i>  | -----       | -----     | V5/Tpx-1-related                       | CGh       |
| <i>CG3448</i>      | <i>CG3448</i>   | 26198-GD    | +         | DNA repair protein XRCC4               | D         |
| <i>CG3568</i>      | <i>CG3568</i>   | 18447-GD    | +         | -----                                  | CG        |
| <i>CG40300</i>     | <i>ago-03</i>   | 35232-GD    | +         | mRNA poly(A) tail shortening           | R         |
| <i>CG40452</i>     | <i>Snap25</i>   | BL-34377    | +         | Target SNARE                           | Neu       |
| <i>CG4174</i>      | <i>CG4174</i>   | BL-36845    | +         | Procollagen-proline 4-dioxygenase      | P         |
| <i>CG42516</i>     | <i>CG42516</i>  | -----       | -----     | Transcription factor TFIIC             | D         |

**Spalt +**

| Name               | Symbol            | RNAi strain | Phenotype | Molecular                                             | Molecular |
|--------------------|-------------------|-------------|-----------|-------------------------------------------------------|-----------|
| <b>Age 24h/48h</b> |                   |             |           |                                                       |           |
| CG42644            | CG42644           | -----       | -----     | -----                                                 | CG        |
| CG43144            | CG43144           | -----       | -----     | Non protein coding gene                               | CR        |
| CG43646            | CG43646           | -----       | -----     | -----                                                 | CG        |
| CG43676            | CG43676           | -----       | -----     | -----                                                 | CG        |
| CG4594             | CG4594            | 100448-KK   | +         | Dodecenoyl-CoA delta-isomerase                        | M         |
| CG4920             | <i>ea</i>         | BL-41961    | +         | Serine-type endopeptidase                             | P         |
| CG5022             | CG5022            | BL-33359    | +         | Ezrin/radixin/moesin like                             | Cyt       |
| CG5096             | CG5096            | 100951-KK   | +         | Leucine-rich repeat                                   | CGh       |
| CG5229             | <i>chm</i>        | BL-36869    | wS        | H4 histone acetyltransferase                          | D         |
| CG5966             | CG5966            | BL-33932    | +         | Triglyceride lipase                                   | M         |
| CG6658             | <i>Ugt86Di</i>    | 104262-KK   | +         | Glucuronosyltransferase                               | M         |
| CG6665             | CG6665            | 104625-KK   | +         | NICE-3                                                | CGh       |
| CG6794             | <i>Dif</i>        | 30579-GD    | +         | DNA binding transcription factor                      | D         |
| CG6912             | CG6912            | 102806-KK   | +         | -----                                                 | CG        |
| CG7035             | <i>Cbp80</i>      | BL-33648    | +         | RNA interference                                      | R         |
| CG7590             | <i>scyl</i>       | 25506-GD    | +         | Negative regulation of growth; response to DNA damage | CD        |
| CG7787             | CG7787            | BL-32843    | +         | Guanyl-nucleotide exchange factor                     | Tra       |
| CG8573             | <i>su(Hw)</i>     | BL-33906    | +         | Negative regulation of chromatin silencing            | D         |
| CG8620             | CG8620            | BL-42638    | +         | -----                                                 | CG        |
| CG8799             | <i>l(2)03659</i>  | 100105-KK   | +         | ATPase, transporter                                   | Tra       |
| CG9214             | <i>Tob</i>        | 108824-KK   | +         | Anti-proliferative                                    | CS        |
| <b>Age 48h</b>     |                   |             |           |                                                       |           |
| CG10160            | <i>ImpL3</i>      | 10160R-1    | S-P//S-P  | Glycolysis                                            | M         |
| CG10245            | <i>Cyp6a20</i>    | 3313-GD     | +         | Electron carrier                                      | RedOx     |
| CG1155             | <i>Osi14</i>      | 102979-KK   | +         | DUF1676                                               | CGh       |
| CG11592            | <i>Amnionless</i> | BL-41956    | +         | Amnionless                                            | CGh       |

**Spalt +**

| Name           | Symbol         | RNAi strain | Phenotype | Molecular                                               | Molecular |
|----------------|----------------|-------------|-----------|---------------------------------------------------------|-----------|
| <b>Age 48h</b> |                |             |           |                                                         |           |
| CG12242        | <i>GstD5</i>   | BL-42842    | +         | Glutathione transferase                                 | RedOx     |
| CG12505        | <i>Arc1</i>    | 48130-GD    | S/V       | Nucleic acid binding                                    | D         |
| CG12846        | <i>Tsp42Ed</i> | 105847-KK   | +         | Tetraspanin                                             | CGh       |
| CG12908        | <i>Ndg</i>     | 109625-KK   | +         | EGF-like calcium-binding                                | CA        |
| CG1299         | <i>CG1299</i>  | 108705-KK   | EPL//wV+  | Serine-type endopeptidase                               | P         |
| CG13060        | <i>CG13060</i> | 49608-GD    | +         | -----                                                   | CG        |
| CG13941        | <i>Arc2</i>    | 3464-GD     | S/Bs      | -----                                                   | CG        |
| CG14059        | <i>Ilp8</i>    | 102604-KK   | +         | Insulin                                                 | CS        |
| CG14196        | <i>CG14196</i> | -----       | -----     | Monocarboxylate transmembrane transporter               | Tra       |
| CG14304        | <i>CG14304</i> | 106221-KK   | +         | Chitin                                                  | Cut       |
| CG14545        | <i>CG14545</i> | BL-35625    | +         | -----                                                   | CG        |
| CG14695        | <i>CG14695</i> | 14695R-1    | +         | -----                                                   | CG        |
| CG15209        | <i>CG15209</i> | 5534-GD     | +         | -----                                                   | CG        |
| CG15347        | <i>CG15347</i> | 107479-KK   | +         | DUF753                                                  | CGh       |
| CG15623        | <i>c-cup</i>   | 106603-KK   | +         | Cytochrome b5-like heme/steroid binding domain          | Mit       |
| CG18859        | <i>Or19a</i>   | BL-31892    | +         | Olfactory receptor                                      | Neu       |
| CG2065         | <i>CG2065</i>  | BL-34098    | +         | Glucose/ribitol dehydrogenase                           | M         |
| CG2885         | <i>RabX2</i>   | 103311-KK   | +         | Small GTPase mediated signal transduction               | CS        |
| CG30196        | <i>CG30196</i> | 30196R-3    | +         | LPS-induced tumor necrosis factor alpha factor.         | CD        |
| CG31062        | <i>side</i>    | 1283-GD     | +         | CD80-like, immunoglobulin C2-set; Fibronectin, type III | Neu       |
| CG31279        | <i>CG31279</i> | 109930-KK   | V+        | -----                                                   | CG        |
| CG32825        | <i>Or19b</i>   | 109050-KK   | sF//+     | Olfactory receptor                                      | Neu       |
| CG34031        | <i>CG34031</i> | -----       | -----     | -----                                                   | CG        |
| CG34165        | <i>CG34165</i> | 109149-KK   | sF//+     | -----                                                   | CG        |
| CG3767         | <i>Jhl-26</i>  | 36566-GD    | +         | CHK kinase                                              | CS        |
| CG4181         | <i>GstD2</i>   | 109123-KK   | sF//+     | Glutathione transferase                                 | RedOx     |

**Spalt +**

| Name           | Symbol         | RNAi strain | Phenotype | Molecular                                     | Molecular |
|----------------|----------------|-------------|-----------|-----------------------------------------------|-----------|
| <b>Age 48h</b> |                |             |           |                                               |           |
| <i>CG42255</i> | <i>CG42255</i> | 100425-KK   | F/sS      | Metalloendopeptidase                          | P         |
| <i>CG42352</i> | <i>Ir40a</i>   | 100912-KK   | +         | Ion channel                                   | Neu       |
| <i>CG42363</i> | <i>CG42363</i> | -----       | -----     | -----                                         | CG        |
| <i>CG4373</i>  | <i>Cyp6d2</i>  | 101829-KK   | +         | Electron carrier                              | RedOx     |
| <i>CG4423</i>  | <i>GstD6</i>   | 105805-KK   | F/S//Bs   | Glutathione transferase                       | RedOx     |
| <i>CG5955</i>  | <i>CG5955</i>  | 102443-KK   | sS/F      | UDP-glucose 4-epimerase                       | M         |
| <i>CG6042</i>  | <i>Cyp12a4</i> | 107088-KK   | +         | Electron carrier                              | RedOx     |
| <i>CG6142</i>  | <i>CG6142</i>  | 100131-KK   | +         | Glucose-methanol-choline oxidoreductase       | M         |
| <i>CG7080</i>  | <i>CG7080</i>  | 104928-KK   | +         | -----                                         | CG        |
| <i>CG7356</i>  | <i>Tg</i>      | 103601-KK   | Bs/S      | Protein-glutamine gamma-glutamyltransferase   | P         |
| <i>CG8927</i>  | <i>CG8927</i>  | 14167-GD    | +         | Cuticle                                       | Cut       |
| <i>CG9521</i>  | <i>CG9521</i>  | 106710-KK   | +         | Oxidation-reduction                           | RedOx     |
| <i>CG9877</i>  | <i>CG9877</i>  | -----       | -----     | -----                                         | CG        |
| <b>Age 24h</b> |                |             |           |                                               |           |
| <i>CG11486</i> | <i>CG11486</i> | BL-42492    | +         | Protein kinase, catalytic domain              | R         |
| <i>CG13316</i> | <i>Mnt</i>     | BL-42558    | EPL/nW//+ | Sequence-specific DNA binding                 | D         |
| <i>CG30059</i> | <i>CG30059</i> | BL-28520    | +         | N-acetylglucosamine-6-sulfatase               | M         |
| <i>CG32019</i> | <i>bt</i>      | BL-31546    | +         | Fibronectin, type III; Immunoglobulin I-set   | CA        |
| <i>CG45050</i> | <i>CG43674</i> | BL-31375    | +         | DNA binding                                   | D         |
| <i>CG6544</i>  | <i>fau</i>     | 106560-KK   | +         | -----                                         | CG        |
| <i>CG7178</i>  | <i>wupA</i>    | BL-31893    | EPL       | Tropomyosin binding; actin binding            | Cyt       |
| <i>CG8663</i>  | <i>nrv3</i>    | BL-29431    | L         | Potassium ion transport; sodium ion transport | Tra       |

**Spalt +**

| Name    | Symbol                 | RNAi strain | Phenotype   | Molecular                           | Molecular |
|---------|------------------------|-------------|-------------|-------------------------------------|-----------|
|         |                        |             |             | Df//UAS                             |           |
| CG10102 | CR10102/Arc3           | -----       | -----       | Non protein coding gene             | CR        |
| CG10916 | CG10916                | 107518-KK   | PL/nW//wS-P | Zinc ion binding                    | D         |
| CG1303  | <i>agt</i>             | 104331-KK   | +           | DNA methylation                     | D         |
| CG14121 | <i>l(3)S147910/ver</i> | 14121R-1    | +           | Telomere capping                    | D         |
| CG15009 | <i>ImpL2</i>           | 15009R-3    | +           | Insulin-like growth facgtor binding | CS        |
| CG16928 | <i>mre11</i>           | 30476-GD    | +           | Nucelase activity                   | D         |
| CG18213 | CG18213                | 18213R-2    | +           | Zinc finger                         | CGh       |
| CG1925  | <i>mus205</i>          | 103775-KK   | sS/Bs//S    | DNA binding                         | D         |
| CG2999  | <i>unc-13</i>          | 33609-GD    | +           | Intracellular signal transduction   | CS        |
| CG3008  | CG3008                 | 43732-GD    | S-P         | Protein kinase activity             | P         |
| CG31705 | CG31705                | 7681-GD     | +           | -----                               | CG        |
| CG32021 | CG32021                | 102286-KK   | V-/S        | -----                               | CG        |
| CG5202  | <i>escl</i>            | 49982-GD    | +           | Histone methyltransferase activity  | D         |
| CG5247  | <i>lrbp</i>            | 5247R-2     | sS//S-P     | DNA binding                         | D         |
| CG6272  | CG6272                 | 101871-KK   | EPL         | Sequence-specific DNA binding       | D         |

**Spalt -**

| Name               | Symbol   | RNAi strain | Phenotype   | Molecular                             | Molecular |
|--------------------|----------|-------------|-------------|---------------------------------------|-----------|
| <b>Age 24h/48h</b> |          |             |             |                                       |           |
| CG10344            | CG10344  | 48026-GD    | +           | Cysteine S-palmitoleyltransferase     | P         |
| CG10539            | S6k      | 10539-R3    | wS          | Ribosomal protein S6 kinase           | CS        |
| CG10541            | Tektin-C | 100094-KK   | EPL//S-P    | Microtubule binding                   | Cyt       |
| CG10576            | CG10576  | BL-34388    | +           | Aminopeptidase                        | P         |
| CG11253            | CG11253  | 105377-KK   | +           | Sensory perception of sound           | CGh       |
| CG11263            | CG11263  | 31112-GD    | +           | Ribonuclease H-like                   | R         |
| CG12182            | CG12182  | 12182R-1    | S-V//S-P    | -----                                 | CG        |
| CG12275            | RpS10a   | 104132-KK   | EPL//sS-P   | Structural constituent of ribosome    | R         |
| CG12843            | Tsp42Ei  | 101044-KK   | sF//+       | EC2 domain                            | CGh       |
| CG13083            | CG13083  | 106400-KK   | PL/nW//wS-P | -----                                 | CG        |
| CG1342             | Spn100A  | 1342R-1     | +           | Serpin domain                         | CGh       |
| CG13890            | CG13890  | 108862-KK   | Cell Pig./+ | Dodecenoyl-CoA delta-isomerase        | M         |
| CG13897            | CG13897  | 13897R-1    | +           | DNA binding                           | D         |
| CG14394            | NijC     | 39307-GD    | Bs/S/V+     | Ninjurin                              | CA        |
| CG14485            | swi2     | BL-28530    | +           | Response to ecdysone                  | CG        |
| CG14715            | CG14715  | 104124-KK   | +           | Peptidyl-prolyl cis-trans isomerase   | P         |
| CG15236            | CG15236  | 15236R-1    | S/Bs        | -----                                 | CG        |
| CG15707            | krimp    | BL-37511    | +           | Tudor domain                          | R         |
| CG17077            | pnt      | 105390-KK   | +           | Protein binding                       | CS        |
| CG2161             | Rga      | 20826-GD    | S // S/CD   | G2/M transition DNA damage checkpoint | D         |
| CG2849             | Rala     | 43622-GD    | S-P/nW//S-P | Ras                                   | CS        |
| CG30104            | CG30104  | 106640-KK   | sF//+       | 5'-nucleotidase                       | D         |
| CG30488            | CG30488  | 100513-KK   | wV+/wBs     | Allergen V5/Tpx-1-related             | CGh       |
| CG31262            | CG31262  | 52605-GD    | +           | Sodium/solute symporter               | Tra       |
| CG31436            | CG31436  | 21344-GD    | S/V-        | CHK kinase-like                       | CGh       |
| CG31809            | CG31809  | BL-29424    | +           | Steroid dehydrogenase                 | M         |

***Spalt -***

| Name               | Symbol          | RNAi strain | Phenotype | Molecular                               | Molecular |
|--------------------|-----------------|-------------|-----------|-----------------------------------------|-----------|
| <b>Age 24h/48h</b> |                 |             |           |                                         |           |
| <i>CG31810</i>     | <i>CG31810</i>  | BL-29424    | +         | Steroid dehydrogenase                   | M         |
| <i>CG32364</i>     | <i>CG32364</i>  | 26045-GD    | +         | RNA recognition motif domain            | R         |
| <i>CG33140</i>     | <i>CG33140</i>  | 18688-GD    | EPL//S-P  | -----                                   | CG        |
| <i>CG33302</i>     | <i>Cpr31A</i>   | 45310-GD    | S/Bs      | Cuticle                                 | Cut       |
| <i>CG34215</i>     | <i>CG34215</i>  | -----       | -----     | -----                                   | CG        |
| <i>CG3649</i>      | <i>CG3649</i>   | 3649R-1     | sS-P//S-P | Phosphate:sodium symporter              | Tra       |
| <i>CG40178</i>     | <i>CG40178</i>  | 110089-KK   | sF//+     | Redox homeostasis                       | Red-Ox    |
| <i>CG4086</i>      | <i>Su(P)</i>    | BL-34955    | +         | Glutathione S-transferase               | Red-Ox    |
| <i>CG41320</i>     | <i>CG41320</i>  | 109162-KK   | sF//+     | Thioredoxin-like fold                   | Red-Ox    |
| <i>CG42330</i>     | <i>Dscam4</i>   | 42882-KK    | +         | Cell adhesion                           | CA        |
| <i>CG43079</i>     | <i>nrm</i>      | 104295-KK   | +         | CD80-like, immunoglobulin C2-set        | CA        |
| <i>CG43103</i>     | <i>CG43103</i>  | -----       | -----     | -----                                   | CG        |
| <i>CG43117</i>     | <i>CG43117</i>  | 103091-KK   | +         | -----                                   | CG        |
| <i>CG4570</i>      | <i>CG4570</i>   | 109328-KK   | sS        | Transposase, Tc1-like                   | D         |
| <i>CG5671</i>      | <i>Pten</i>     | 35731-GD    | LS        | Phosphoprotein phosphatase activity     | CS        |
| <i>CG6013</i>      | <i>CG6013</i>   | 6013R-2     | +         | HMG box domain                          | D         |
| <i>CG7160</i>      | <i>Cpr78E</i>   | 7160R-3     | sS        | Cuticle                                 | Cut       |
| <i>CG7354</i>      | <i>mRpS26</i>   | 100067-KK   | EPL//S-P  | Ribosomal protein                       | R         |
| <i>CG7478</i>      | <i>Act79B</i>   | BL-36857    | +         | Cytoskeleton                            | Cyt       |
| <i>CG7532</i>      | <i>l(2)34Fc</i> | 7532R-1     | +         | Serine-type endopeptidase               | P         |
| <i>CG7607</i>      | <i>CG7607</i>   | 9208-GD     | +         | Immunoglobulin-like domain              | CA        |
| <i>CG7916</i>      | <i>CG7916</i>   | 101195-KK   | sF//+     | Haemolymph juvenile hormone binding     | CGh       |
| <i>CG8023</i>      | <i>eIF4E-3</i>  | BL-42804    | +         | Eukaryotic initiation factor 4G binding | R         |
| <i>CG8768</i>      | <i>CG8768</i>   | 8768R-2     | sS        | NAD-dependent epimerase/dehydratase     | M         |
| <i>CG9333</i>      | <i>Oseg5</i>    | 100020-KK   | S/V+      | WD40-repeat                             | CGh       |



**Spalt -**

| Name           | Symbol         | RNAi strain | Phenotype | Molecular                                    | Molecular |
|----------------|----------------|-------------|-----------|----------------------------------------------|-----------|
| <b>Age 48h</b> |                |             |           |                                              |           |
| CG11051        | <i>Nplp2</i>   | 15305-GD    | +         | Neuropeptide hormone                         | CS        |
| CG14332        | CG14332        | 41165-GD    | +         | -----                                        | CG        |
| CG17876        | <i>Amy-d</i>   | 109082-KK   | +         | Alpha-amylase                                | M         |
| CG18363        | <i>dic-04</i>  | 8416-GD     | +         | Mitochondrial carrier                        | Tra       |
| CG33126        | <i>NLaz</i>    | 101321-KK   | sS/V+     | Lipocalin/cytosolic fatty-acid binding       | M         |
| CG42798        | CG42798        | -----       | -----     | -----                                        | CG        |
| CG42834        | CG42834        | -----       | -----     | -----                                        | CG        |
| CG9486         | CG9486         | 102802-KK   | S/Bs      | Acyl-CoA N-acyltransferase                   | M         |
| <b>Age 24h</b> |                |             |           |                                              |           |
| CG13053        | CG13053        | 9227-GD     | +         | -----                                        | CG        |
| CG17134        | CG17134        | BL-42868    | +         | Aspartic-type endopeptidase                  | P         |
| CG2360         | <i>Ccp84Aa</i> | 49694-GD    | +         | Chitin                                       | Cut       |
| CG3200         | <i>Reg-2</i>   | 3200R-3     | +         | Phosphoglycolate phosphatase                 | M         |
| CG32444        | CG32444        | 101230-KK   | +         | Aldose 1-/Glucose-6-phosphate 1-epimerase    | M         |
| CG43114        | CG43114        | -----       | -----     | -----                                        | CG        |
| CG6579         | <i>atilla</i>  | 101803-KK   | sF//+     | -----                                        | CG        |
| CG8800         | CG8800         | 107835-KK   | sF//+     | Leucine rich repeat 4                        | CGh       |
| <b>Df//UAS</b> |                |             |           |                                              |           |
| CG10041        | CG10041        | 110063-KK   | +         | Serine-type endopeptidase activity           | P         |
| CG10225        | <i>RanBP3</i>  | 104432-KK   | F//+      | Negative regulation of Wnt signaling pathway | CS        |
| CG10382        | <i>wrapper</i> | 10382R-3    | +         | Immunoglobulin subtype 2                     | CGh       |
| CG11212        | <i>Ptr</i>     | BL-28973    | +         | Hedgehog receptor activity                   | CS        |
| CG11357        | CG11357        | 108467-KK   | L/Bs      | Transferring glycosyl groups                 | P         |
| CG11607        | <i>H2.0</i>    | 15876-GD    | L//sS-P   | Sequence-specific DNA binding                | D         |
| CG11797        | <i>Obp56a</i>  | 100850-KK   | +         | Odorant binding                              | CS        |

***Spalt -***

| Name    | Symbol           | RNAi strain | Phenotype  | Molecular                                                   | Molecular |
|---------|------------------|-------------|------------|-------------------------------------------------------------|-----------|
|         |                  |             |            | <b>Df//UAS</b>                                              |           |
| CG11883 | CG11883          | 38590/GD    | S-P//S-P   | 5'-nucleotidase activity                                    | D         |
| CG12052 | <i>lola</i>      | BL-35721    | L/F        | Sequence-specific Dna binding transcription factor activity | D         |
| CG12256 | CG12256          | 12256R-4    | +          | Serine-type endopeptidase activity                          | P         |
| CG12287 | <i>pdm2</i>      | 102126-KK   | Bs         | DNA binding                                                 | D         |
| CG1273  | CG1273           | 4496-GD     | +          | -----                                                       | CG        |
| CG12952 | <i>sage</i>      | BL-25980    | +          | Sequence-specific DNA binding transcription factor activity | D         |
| CG13618 | CG13618          | 14714-GD    | +          | Haemolymph juvenile hormone binding                         | CGh       |
| CG13848 | <i>pinta</i>     | 13848R-4    | +          | Retinoid binding                                            | M         |
| CG14590 | CG14590          | 41536-GD    | +          | Histone deacetylase binding                                 | D         |
| CG14869 | CG6107           | 110157-KK   | +          | Zinc ion binding                                            | P         |
| CG15369 | CG15369          | 15369R-2    | +          | Cysteine-type endopeptidase inhibitor activity              | P         |
| CG15739 | CG15739          | 106016-KK   | F//S-P     | Phosphatase activity                                        | P         |
| CG16705 | <i>SPE</i>       | 30972-GD    | L//S-P     | Serine-type endopeptidase activity                          | P         |
| CG16712 | CG16712          | 109238-KK   | +          | Serine-type endopeptidase inhibitor activity                | P         |
| CG16756 | CG16756          | 102908-KK   | S          | Lysozyme activity                                           | P         |
| CG16947 | CG16947          | 108103-KK   | +          | Zinc finger, RING-type                                      | CGh       |
| CG1725  | <i>dlg1</i>      | 1725-R2     | L//sS-P    | Epidermal growth factor receptor binding                    | CA        |
| CG1763  | <i>nod</i>       | 48150-GD    | +          | DNA binding                                                 | D         |
| CG1780  | <i>ldgf4</i>     | 1780R-4     | +          | Imaginal disc growth factor receptor binding                | CS        |
| CG18024 | <i>SoxN</i>      | BL-25996    | +          | Chromatin DAN binding                                       | D         |
| CG18255 | <i>Strn-Mlck</i> | -----       | -----      | Protein serine/threonine kinase activity                    | P         |
| CG18410 | <i>Ude</i>       | 18410R-2    | +          | DNA binding                                                 | D         |
| CG18657 | <i>NetA</i>      | 18657R-2    | +          | Netrin domain                                               | CGh       |
| CG1869  | <i>Cht7</i>      | 42877-GD    | sS-P//sS-P | Chitinase activity                                          | Cut       |
| CG2056  | <i>spirit</i>    | 3285-GD     | +          | Serine-type endopeptidase activity                          | P         |
| CG2488  | <i>phr6-4</i>    | 2488R-3     | +          | DNA (6-4) photolyase activity                               | D         |

***Spalt -***

| Name    | Symbol           | RNAi strain | Phenotype     | Molecular                                       | Molecular |
|---------|------------------|-------------|---------------|-------------------------------------------------|-----------|
|         |                  |             |               | Df//UAS                                         |           |
| CG2706  | <i>fs(1)Yb</i>   | 110056-KK   | +             | Tudor domain                                    | D         |
| CG30069 | CG30069          | 25562-GD    | S/Bs          | -----                                           | CG        |
| CG3097  | CG3097           | -----       | -----         | Zinc ion binding                                | P         |
| CG3100  | <i>b6</i>        | 14526-GD    | +             | Neuronal pentraxin receptor activity            | CS        |
| CG31098 | CG10634          | 21300-GD    | V+            | Transferase activity                            | P         |
| CG31721 | <i>Trim9</i>     | 100767-KK   | +             | Zinc finger, B-box                              | CGh       |
| CG31764 | <i>vir-1</i>     | 102534-KK   | +             | -----                                           | CG        |
| CG31839 | <i>nimB2</i>     | 105925-KK   | +             | Insulin-like growth factor binding protein      | CS        |
| CG31884 | <i>Trx-2</i>     | 36297-GD    | +             | Disulfide oxidoreductase activity               | D         |
| CG32029 | <i>Cpr66D</i>    | 112709-KK   | S/Bs          | Structural constituent of chitin-based cuticle  | Cut       |
| CG32055 | CG32055          | 6335-GD     | wS            | Insulin-like growth factor binding              | CS        |
| CG32261 | <i>Gr64a</i>     | 103342-KK   | S/F           | Taste receptor activity                         | CS        |
| CG3240  | <i>Rad1</i>      | 12676-GD    | +             | Exonuclease activity                            | D         |
| CG32491 | <i>mod(mdg4)</i> | BL-32995    | F             | DNA binding                                     | D         |
| CG3289  | <i>Ptpa</i>      | 41913-GD    | +             | Protein tyrosine phosphatase activator activity | CS        |
| CG33197 | <i>mbl</i>       | BL-29585    | Bs/P          | DNA binding                                     | D         |
| CG33960 | <i>Sema-2b</i>   | BL-28932    | +             | Sema domain                                     | CS        |
| CG33970 | CG33970          | 33090-GD    | +             | Transporter activity                            | Tr        |
| CG34406 | CG44002          | 43767-GD    | +             | Zinc ion binding                                | D         |
| CG42614 | <i>scrib</i>     | BL29552     | PL/nW/sS-P/CD | Protein binding                                 | CA        |
| CG4322  | <i>moody</i>     | 4322R-1     | S-P//S-P      | Melatonin receptor activity                     | CS        |
| CG4379  | <i>Pka-C1</i>    | 101524-KK   | S-P           | Protein binding                                 | CS        |
| CG4398  | CG4398           | 4398R-1     | +             | -----                                           | CG        |
| CG4432  | <i>PGRP-LC</i>   | 4432R-1     | +             | Protein dimerization activity                   | D         |
| CG4565  | CG4565           | BL-32893    | +             | Histone-lysine N-methyltransferase activity     | D         |
| CG5249  | <i>Blimp-1</i>   | 5249R-2     | S-P/F         | Nucleic acid binding                            | D         |

***Spalt -***

| Name   | Symbol         | RNAi strain | Phenotype   | Molecular                                                 | Molecular |
|--------|----------------|-------------|-------------|-----------------------------------------------------------|-----------|
|        |                |             |             | <b>Df//UAS</b>                                            |           |
| CG6134 | <i>spz</i>     | BL-28538    | +           | Protein homodimerization activity                         | CS        |
| CG6713 | <i>Nos</i>     | BL-28792    | +           | Nitric-oxide synthase activity                            | D         |
| CG7201 | <i>CG7201</i>  | 101198-KK   | sF//+       | -----                                                     | CG        |
| CG7420 | <i>CG7420</i>  | BL-32510    | L           | Regulator of chromosome condensation, RCC1                | D         |
| CG7577 | <i>ppk20</i>   | 36659-GD    | S           | Sodium channel activity                                   | Tr        |
| CG7734 | <i>shn</i>     | 105643-KK   | sS-P//sS-P  | RNA polymerase II activating transcription factor binding | D         |
| CG7897 | <i>gp210</i>   | -----       | -----       | Protein import into nucleus                               | CS        |
| CG7906 | <i>CG7906</i>  | BL-30519    | +           | Kazal domain                                              | P         |
| CG8084 | <i>ana</i>     | BL-27515    | S/V+//S-P   | Growth factor activity                                    | CS        |
| CG8589 | <i>tej</i>     | 103264-KK   | +           | Tudor domain                                              | D         |
| CG8675 | <i>CG8675</i>  | 8675R-1     | S-P/nW//S-P | -----                                                     | CG        |
| CG8773 | <i>CG8773</i>  | 10203-GD    | +           | Metallopeptidase activity                                 | P         |
| CG8780 | <i>tey</i>     | 106065-KK   | Bs/S        | Negative regulation of transcription                      | D         |
| CG8945 | <i>CG8945</i>  | 46925-GD    | F           | Zinc ion binding                                          | P         |
| CG9355 | <i>dy</i>      | 9355R-1     | L//S-P      | Structural constituent of chitin-based cuticle            | Cut       |
| CG9460 | <i>Spn42De</i> | 9460R-3     | +           | Serine-type endopeptidase inhibitor activity              | P         |
| CG9850 | <i>CG11169</i> | 107199-KK   | sF//+       | Metalloendopeptidase activity                             | P         |
