# Supplementary material for: The Spalt Transcription Factors Generate the Transcriptional Landscape of the Drosophila melanogaster Wing Pouch Central Region
Source: PubMed Central journal article supplement (PMC4524721; doi:10.1371/journal.pgen.1005370), 2015-08-04
Supplement: pgen.1005370.s021.pdf [file pgen.1005370.s021.pdf]

| Concentration (ngr/ $\mu$ l)                                                                | Ratio 260/280 | Ratio 260/230 | Sample volume ( $\mu$ l) | Sample $\mu$ gr |
|---------------------------------------------------------------------------------------------|---------------|---------------|--------------------------|-----------------|
| <i>sal<sup>EPv</sup>-Gal4 UAS-GFP; tub-Gal80<sup>ts</sup> 24h</i>                           |               |               |                          |                 |
| 256,75                                                                                      | 2,09          | 0,94          | 20                       | 5,14            |
| 327,39                                                                                      | 2,08          | 0,57          | 12                       | 3,93            |
| 312,07                                                                                      | 2,08          | 0,96          | 10                       | 3,12            |
| 256,51                                                                                      | 2,10          | 0,50          | 15                       | 3,85            |
| 238,95                                                                                      | 2,10          | 0,50          | 10                       | 2,39            |
| <i>sal<sup>EPv</sup>-Gal4 UAS-GFP; tub-Gal80<sup>ts</sup> 48h</i>                           |               |               |                          |                 |
| 341,09                                                                                      | 2,08          | 0,57          | 12                       | 4,09            |
| 336,21                                                                                      | 2,05          | 1,01          | 15                       | 5,04            |
| 331,09                                                                                      | 2,09          | 0,64          | 15                       | 4,97            |
| 371,65                                                                                      | 2,09          | 0,63          | 12                       | 4,46            |
| <i>sal<sup>EPv</sup>-Gal4 UAS-GFP / UAS-salm-i; tub-Gal80<sup>ts</sup> / UAS-salr-i 24h</i> |               |               |                          |                 |
| 353,12                                                                                      | 2,08          | 0,94          | 10                       | 3,53            |
| 265,25                                                                                      | 2,08          | 1,52          | 15                       | 3,98            |
| 286,97                                                                                      | 2,09          | 1,41          | 15                       | 4,30            |
| 322,38                                                                                      | 2,09          | 0,63          | 15                       | 4,84            |
| <i>sal<sup>EPv</sup>-Gal4 UAS-GFP / UAS-salm-i; tub-Gal80<sup>ts</sup> / UAS-salr-i 48h</i> |               |               |                          |                 |
| 236,95                                                                                      | 2,00          | 0,41          | 10                       | 2,37            |
| 325,06                                                                                      | 2,08          | 0,76          | 12                       | 3,90            |
| 314,65                                                                                      | 2,09          | 1,03          | 12                       | 3,78            |
| 235,28                                                                                      | 2,10          | 0,43          | 15                       | 3,53            |
