# Supplementary material for: The Spalt Transcription Factors Generate the Transcriptional Landscape of the Drosophila melanogaster Wing Pouch Central Region
Source: PubMed Central journal article supplement (PMC4524721; doi:10.1371/journal.pgen.1005370), 2015-08-04
Supplement: pgen.1005370.s022.pdf [file pgen.1005370.s022.pdf]

| <b>Name</b> | <b>Symbol</b> | <b>Primer AS T3</b>   | <b>Primer S T7</b>    |
|-------------|---------------|-----------------------|-----------------------|
| CG10041     | CG10041       | TCAAGCGTTTTGAGGAAAAC  | CAACTGTGTGCGACCACGAAG |
| CG10225     | RanBP3        | GTTGTCGATGGCCGTTAGTC  | CAAGTGCAGGTGAAGACAGC  |
| CG10576     | CG10576       | TGCTTTGCTTTTTCGTTGC   | TTAAGCACACGGTTCTGCTC  |
| CG1058      | rpk           | GGCGCTTCAGATTGGTAAAG  | TAGGCCCCGAAAACGTTAGTG |
| CG11155     | CG11155       | CTTCGTTTTCGCGTCTATG   | TCGACAATGCTGGACTATGC  |
| CG11212     | Ptr           | CGTCGTCTAAATCGCTCCTC  | TCACCGCTCACATCTGCTAC  |
| CG11263     | CG11263       | TAAGAGTTGGAACCCGAAGC  | GATGGAAACGAGAGCTTTGC  |
| CG11486     | CG11486       | TGCGTCCATGATCAGGTTAG  | GACGCCCACTTCTATGCAC   |
| CG11584     | CG11584       | TGTAGGTCACCTGCTGTTGC  | AATTGCCATTCCAGTTCCTG  |
| CG11897     | CG11897       | AACATAATCCTGGCGCAGAC  | GCTCAGCTTTATCCCCTGC   |
| CG12052     | lola          | TGTAGGGGCGAGTAGGGACAC | TAGATCCCTCGACCATTTTCG |
| CG12224     | CG12224       | GTTAATCCGCAGCAGCTTTC  | GCCAGCTACTTTTCGTCAGG  |
| CG12367     | Hen1          | CAGCGTTCCTCCTCTTGTTT  | AAATTCTGCAGGGGAATGTG  |
| CG12952     | sage          | GGAGCGCAGTAAGTCAAAGG  | AGTTTTGGTGCCCGTATCAG  |
| CG1303      | agt           | ACTTTTCATCGGCCAGAAGC  | AAACACCCAGATTCGTTTGG  |
| CG13083     | CG13083       | TGGTGTGACGGATTTTTGTG  | TGAGGATCTGGACTCCATCC  |
| CG13848     | pinta         | CATAGAAATCGGCGTTCTCC  | CTGCTGCTAAAGCTCGATCC  |
| CG13890     | CG13890       | CAGCTGTGCGATTCATTCAC  | ATATGCTGCCCCTCATCTTG  |
| CG13937     | CG13937       | CGTAGAGCTCCAGCATTTC   | TGCGTGAGGCACAGAACTAC  |
| CG14394     | NijC          | TACAATGTGGCAAGCAAGTG  | CATTCTGTTCGTGGTCATCG  |
| CG14485     | swi2          | CACAATCCAAGGAACTCGAC  | CGGGACAATCCCCACTAC    |
| CG14590     | CG14590       | CTCCAAGCCAGCTTCGTTAC  | CACGAGTCAATGGAATGCAG  |
| CG14869     | CG6107        | ACTGGCCAATGCGATTGTAG  | GTGAGGGTGTGGAGAAGAGG  |
| CG15400     | CG15400       | ATATAGTGGCGAGGCCAAAG  | TTCTCAGCGTTCATTTGGAG  |
| CG15892     | CG15892       | AGTCATAGCGGGTGCCTTC   | ATGTCTCGGATTGGGATGAG  |
| CG17077     | pnt           | CGGTCCACGAAATGAACTC   | ACTGTCAATGGCAGCGGTAG  |
| CG17104     | CG17104       | GGCTGCCTCTTCCTTTACTG  | TGCCATTCTGCTACTGATCG  |
| CG17134     | CG17134       | GCCAGGGTGAAGACAGTACC  | GCAGTGTTAAGGCCGAGAAG  |
| CG17533     | GstE8         | TTGAGGAGGGTACCAAATC   | GAGGCTAGTCCCTCCAGTTCG |
| CG1780      | ldgf4         | GAACCTGTCGTGGCCAGTG   | TCGATGTGCCCGCTATTATC  |

| Name    | Symbol    | Primer AS T3          | Primer S T7           |
|---------|-----------|-----------------------|-----------------------|
| CG17803 | CG17803   | TGTTGCGCGTATAGAGATCG  | CTACCGCATCACATTTGCTC  |
| CG18188 | Damm      | CGTTCGACCTCAGCCTTAAC  | GCAGTTCCTCAGGATTCTC   |
| CG18255 | Strn-Mlck | GCGCTGATAGCGATAGTTCC  | TTATCGGGGTGAAAACGAAG  |
| CG18278 | CG18278   | GTGTTGTTCCATGCATCCTG  | TGGCGGGAAGTACTTGAATC  |
| CG18410 | Ude       | GTCTTCTTGCCAGCTTTTC   | CGAGATCCGGACTACCAGAG  |
| CG1851  | Ady43A    | TTGTTGTGCGCTATCTGAGG  | CTCTCGGTGCCTTACAAACC  |
| CG2056  | spirit    | GAATTCGGGACTGAACTGG   | GAGCCACCCAGTCAGGTG    |
| CG2184  | Mlc2      | TTCATCTTGCCGTGTGTAGC  | TGATCGACGACAAGAACCAG  |
| CG2488  | phr6-4    | TCTCCTCGAAAGACGACTCC  | GCATGGAGGAATCCCTAAG   |
| CG2999  | unc-13    | ACCCATAAAGCGCTTGTGAC  | GTCAAGGCCTCCAGAGACAG  |
| CG30488 | CG30488   | TGACTGTTTCATCATGCATCC | TGCGAGCTTGATAACCAGAAG |
| CG3074  | Swim      | CAACTTCACCGAGTGGAACC  | GTGGACCCAATCATCTCCTG  |
| CG3081  | CG3081    | CACCACCAGAACCCTACCAC  | CATCCAATCATGTGCGAAAC  |
| CG31098 | CG10634   | TGCTCTCAAACATGGTCAGC  | GAACCGGCAGCAAGAACTAC  |
| CG31262 | CG31262   | ACCACAACCTGCTGTGACGAC | ATCGGTGGCTTTTCATTCTG  |
| CG31436 | CG31436   | CTTCCAAAGACCCGATTGAC  | AGGCAGAGGGACACAAGAAG  |
| CG31839 | nimB2     | CTGCAGATGCAGAAGTTTGG  | CAATTCGCGGGATCAGTTC   |
| CG31875 | CG31875   | TTTTTGTTGGCATCAACAG   | CACGCAAGGAGAAAACGAGAC |
| CG3200  | Reg-2     | TCCTCGCCGTATTTCTTGAC  | TGCACAACCTTCTCCAACCAC |
| CG32055 | CG32055   | CTTTCGACGATTCCTTGAGC  | GGGAATATTTTACGCGTTGC  |
| CG3240  | Rad1      | AATCAGTGTTGAGCAAAGGAA | GCAAGTCTCCGAAGATGGTC  |
| CG32444 | CG32444   | TTGGGGGTTGGACTTTATTG  | GGGAGGTGGTACAGAAGTCG  |
| CG32491 | mod(mdg4) | AGGACTTGGTCGCATTGTTT  | GTCTTTCCGTCGAGTTGTGC  |
| CG32625 | CG32625   | TCCATTAATCGCTTGCCTTC  | TGAAGTTGACGAAGGGGAAG  |
| CG32788 | Crg-1     | AGTTGTTGCCGCTGCTTTT   | TACTTCCTCCCGCTCCTACC  |
| CG33048 | Mocs1     | CTTTGTTGCCAAACAAGCAC  | AGCCGAAAAACAACCTCCTG  |
| CG33140 | CG33140   | ATTGGCTTTGGTTGATCTGG  | AACGGGTCCGATACCTTTTC  |
| CG33302 | Cpr31A    | AGGCCGTCTTCTTGTTCTCC  | CACCTATGCCGGCTATCATC  |
| CG33397 | CG33397   | GTTAATCCGCAGCAGCTTTC  | GCCAGCTACTTTCGTC AAGG |
| CG34002 | CG34002   | TCACCTTCACCACCATCATC  | GTCACCAAAGTGCGGAAAAG  |

| Name    | Symbol         | Primer AS T3               | Primer S T7                 |
|---------|----------------|----------------------------|-----------------------------|
| CG34215 | CG34215        | GGTAATCTGCGTTTGGGTTT       | ATTTGAAGGCTCCAAGATGC        |
| CG3649  | CG3649         | TTGGTGATGCTTCTGTTTCG       | GCATCGTGTGGTGCCTTAC         |
| CG40178 | CG40178        | AAAACCAGTTGTGGCACTTC       | ATGATTACGGTGCCGAAAAG        |
| CG40300 | <i>ago-03</i>  | GTGCTTGAATGTAGGCATCG       | TTTTCTCCATTGACTCTG          |
| CG40452 | <i>Snap25</i>  | AAACCATGAGGACCGTTTTG       | TCTAATGAAGCGCGGATAGC        |
| CG41320 | CG41320        | CCAGTTGTGGCACTTCTCTG       | GACATTGCATTTTATCAGAAGTTATCA |
| CG4174  | CG4174         | AGTTTGGCAGGATTCGATTG       | GTTGTAAGTGCCTGCCTTGG        |
| CG42516 | CG42516        | TCGGTCTGATCGTCTCTTC        | TGTGCACGCACATTTCTAAC        |
| CG43079 | <i>nrm</i>     | TTTAGGGTTGCCATTTTTGG       | TGCTCAAAGACCCAAGGAAC        |
| CG43103 | CG43103        | AAACCGAATGTGTCGTATTTTT     | CCAAGCCGGAGGCTAGTAGT        |
| CG43114 | CG43114        | TTCGCCTTTATTCCGATTTG       | CTGACAACCTCATCAGCATGGA      |
| CG43117 | CG43117        | TGCCATTATTAGAAATGTGTTTT    | CGCACAATGAAGCTAAGCAC        |
| CG43144 | CG43144        | TTGTCTGTTGGTTGTCAGTCG      | GATGGCTCAGGCTTTCCTC         |
| CG43646 | CG43646        | CAGGGTTCGGGTATAGCTTG       | TTGGCACAGATTTCACTTCG        |
| CG43676 | CG43676        | TTTATTGTCCTGTAATTTCTTTCTGA | ATGCACTCCGCATCACTGTA        |
| CG4379  | <i>Pka-C1</i>  | ACTCCTTGGCACACTTCTCG       | GTGTCATGATCGTCCAGCAC        |
| CG45050 | CG43674        | CGTTCCATCTTTGCTCCTTC       | TGGACAAGAGCATTGAGCAC        |
| CG4570  | CG4570         | AGCTTGGCTAGCAGAACTCG       | CAGCTTGCTCGCCATAAAAC        |
| CG4594  | CG4594         | GCTCCCATAACCTTCTGCAC       | TGGATTGCCCTCTATGGAAC        |
| CG5229  | <i>chm</i>     | GCTGGAATCACTTCCCTCAG       | GGATCCACCAGTTCGGAAAC        |
| CG5671  | <i>Pten</i>    | ATCTTCCTCGCCATCTTCG        | CTGAAGCGTCCGAAAAAGAG        |
| CG6134  | <i>spz</i>     | GCAGCAGGAAGGGATCTTG        | CTTTGTCTTCCCCGATTCC         |
| CG6579  | <i>atilla</i>  | TTGCAGGTGTAGCAGCTCTC       | CGGCCATCAAGTGTTATCAG        |
| CG6658  | <i>Ugt86Di</i> | TGGTACTGCCACCAGTTCAG       | GTGCCCCACATAATGCTACC        |
| CG6713  | <i>Nos</i>     | GATTACGGCAGCCAAAGAAG       | TTCGCTGACTGTGAATACGG        |
| CG7178  | <i>wupA</i>    | TTCATCAAGGCGTTTCAGATG      | AGAAACCCGACTGGTCCAAG        |
| CG7420  | CG7420         | CATTTTCGGTGCTGTTGTTG       | AGCCATCACGTTGACCAAAC        |
| CG7590  | <i>scyl</i>    | CGTATACTCCGACTGATGG        | GGACCTGATGTCCAAGAAGG        |
| CG8023  | <i>eIF4E-3</i> | CCTCAACGGTGTTGAAGCTG       | AAGGTTTCGTTTATCGCATTG       |
| CG8573  | <i>su(Hw)</i>  | ATTTGTCAATGCGCAAGATG       | ATTATGGAACGCACGGATTG        |

| Name   | Symbol     | Primer AS T3         | Primer S T7             |
|--------|------------|----------------------|-------------------------|
| CG8589 | <i>tej</i> | CACAGCATAAGCTGGAATGG | CAAATGGCATGGATAACTGC    |
| CG8768 | CG8768     | TTTCGGAGGGCGTGATTC   | CGCTGTTGTGGGTCATGG      |
| CG8780 | <i>tey</i> | CAAGGCGTACTTCCTCTTGC | CTGCATAATGCGGGGAAG      |
| CG8800 | CG8800     | GAAAGTTCGCATGGAAAACC | TTGAGAAGATATTCGGCTTATCG |
| CG9214 | <i>Tob</i> | TGGCACTTATTGGCCCTATC | CAATGTGGACTGCGGTAGTG    |

| Name    | Symbol                 | Primer AS T7          | Primer S T3               |
|---------|------------------------|-----------------------|---------------------------|
| CG10102 | CR10102/ <i>Arc3</i>   | TACTCCTCGTGCTGCTCCTC  | CTCATCCGCGAACACTTCTC      |
| CG10382 | <i>wrapper</i>         | GCTCAACACTTCCGCTTTTC  | GATGTGGCTCTGGTGGACTC      |
| CG11357 | CG11357                | TCGACAGAGCATCAGATTGG  | AAATCATCGCCGATTTTAGC      |
| CG11797 | <i>Obp56a</i>          | ACTTGGAGGCGGTATCACAC  | CCCTTAATCTGAGCGACGAG      |
| CG11883 | CG11883                | AAGGGCAATGATGAGGTCAC  | CAGGGAACCTCTGACGAGAC      |
| CG12256 | CG12256                | CAAACCTTTCCAAGGCACAG  | CATGAACGGAGTAACTTATTTTGTG |
| CG12287 | <i>pdm2</i>            | GACCAGAGAGTTTGGCTTGG  | TTGAGGACATCGGGAAAGTC      |
| CG14121 | <i>l(3)S147910/ver</i> | TGCATTGTTTTATGCCTTCG  | TGGATTTTAATCAGAGTTTCGAG   |
| CG15739 | CG15739                | TCCGCATAGTAGTCCGGTATG | TCGACGTGGACTTCAATCTG      |
| CG15784 | CG15784                | AGCGCTGCTGTCTTTTCTTC  | CACCAAAAGGACCAAGAAGC      |
| CG16756 | CG16756                | CGTTTCGGCAATATCGTTG   | TGCTCTCGAATTGTGAGTGG      |
| CG16928 | <i>mre11</i>           | TCGCATTAACATGCAGGAC   | TCCTGTTTCCCTGGAGATTC      |
| CG16947 | CG16947                | GCTTGTAGTGAGCGCATCC   | CGCCGAATATCGCTAAATG       |
| CG1725  | <i>dlg1</i>            | GCTCCTCCTCATCCTGACTG  | GGATTCGGATACGGACTCG       |
| CG1763  | <i>nod</i>             | ACCTAGCAGCTCCAGCAGAG  | CAGCAGCAGCTCAAAGTACG      |
| CG18024 | <i>SoxN</i>            | CAGAGCTGTATTCCCGCTTC  | TGCATTGAGCAGCCTAACTG      |
| CG18657 | <i>NetA</i>            | GATCGAAGTGGAATGGCTTG  | GCATTCCGGACTTTGTGAAC      |
| CG1925  | <i>mus205</i>          | CACGATCATTGCCAGTATG   | ATTCGGCAAATCCAGATGAG      |
| CG2706  | <i>fs(1)Yb</i>         | CCGAATCAATCCATTTTTGG  | TGTTGCTCCAAGTCTGAAC       |
| CG2914  | <i>Ets21C</i>          | GTCGTAGTTTCCCGCAGAAG  | AATCCAGCTGTGGCAGTTTC      |
| CG30196 | CG30196                | ATTCTCATTGGAACGCTTCG  | CGAGAGTCTGGATGGCAGTG      |
| CG3100  | <i>b6</i>              | AAATTCATTGCCACAAGC    | TACAGACGCGTGGAAGATTG      |

| <b>Name</b> | <b>Symbol</b>    | <b>Primer AS T7</b>   | <b>Primer S T3</b>     |
|-------------|------------------|-----------------------|------------------------|
| CG32261     | <i>Gr64a</i>     | GTGCCACTGTCTGTGTGGTC  | CGTGCACTTTTGTGTGGAAC   |
| CG32364     | CG32364          | GAAACAGCCCTTTTGTCTGG  | CGAGGAATCACAGTTGTTCTCC |
| CG3289      | <i>Ptpa</i>      | CACTGCCCCAGATGAAGG    | GGCAATTGCGAAGAAGGTG    |
| CG33960     | <i>Sema-2b</i>   | ACACCGGCGACTGTACTACC  | AGGACGTTTCGTGATTTTTTCG |
| CG34406     | CG44002          | GATATAGCCGCGTTCTCGAC  | TATGCCACCATGTGTGAAG    |
| CG42330     | <i>Dscam4</i>    | GCATTATTGTGTGCCGTGAC  | TAGGTCCCTTCGTGGAAATG   |
| CG42614     | <i>scrib</i>     | ACTCGGTTTCGTCTTGGATG  | CGATGAGGATGATGATGACG   |
| CG4398      | CG4398           | GATTTGCGCTTGAACCTCTGC | TGAGACTGGTGTCTGCAATTC  |
| CG4432      | <i>PGRP-LC</i>   | AATGCGGGGTTATCCTGTC   | TGTTCCAATGCGAAACGTAG   |
| CG4565      | CG4565           | CGCAGCTGTGGTTCAGGTAG  | ATGGACGAATCTGAAACAGC   |
| CG5249      | <i>Blimp-1</i>   | ACACATAGGGCCTGTCTGTTT | TCCAATCTGGGACAGAATCC   |
| CG7080      | CG7080           | CTTGTAGCAGCCCTCCACTC  | CTTTGGTTAGCTGCCAGGAC   |
| CG7080      | CG7080           | CTTGTAGCAGCCCTCCACTC  | CTTTGGTTAGCTGCCAGGAC   |
| CG7201      | CG7201           | CCTCCACTACGCCATAGAGC  | AAGGTGTTAAGGCGATGCAG   |
| CG7577      | <i>ppk20</i>     | GGCCTGGCAGATACTTACG   | ATTCGGTCAAACCGACAGAG   |
| CG7734      | <i>shn</i>       | TGTTTGAGGAGAGCGATGTG  | ACGGCCAAGCATTACAAAAC   |
| CG7897      | <i>gp210</i>     | ATCAACAATGGCGAAAAAGG  | TTCGCCGAGGAAGTACAAAC   |
| CG7906      | CG7906           | GGCACAAATGGACAGTGATG  | ACTACGGAAGCCGCAACTAC   |
| CG8773      | CG8773           | TTCGTCTGTACAAAAGCGATG | ACAAGTGAACCCGGCACTAC   |
| CG8799      | <i>l(2)03659</i> | AGCCAAACTAATGCCACCTG  | CAGTCCGAAGAGCTGGGTAG   |
| CG8945      | CG8945           | ATTTGGCCTTGAAGTTGTGC  | TTGTGCTCTTGATCGTGGTC   |
| CG9333      | <i>Oseg5</i>     | AGTGGCTTGATGGATATGTGC | CGCGAATCTGCAAGAAAAAC   |
| CG9460      | <i>Spn42De</i>   | GCTGCCTGTAGAGGGACATC  | CGTGTTCACTTCTGCTGCTC   |
