# Supplementary material for: The Spalt Transcription Factors Generate the Transcriptional Landscape of the Drosophila melanogaster Wing Pouch Central Region
Source: PLoS Genet. 2015 Aug 4;11(8):e1005370. doi: 10.1371/journal.pgen.1005370 (PMC4524721; doi:10.1371/journal.pgen.1005370)
Supplement: S2 Table — (XLSX) [file pgen.1005370.s017.xlsx]

## Sheet: Data 24h
Row	Col	ControlType	ProbeName	SystematicName	Status	gene_id	Symbol	Genename	logFC	AveExpr	t	P.Value	adj.P.Val	B
159	137	0	CUST_27031_PI428323385	CG42644	Probe	10178858	CG42644	CG42644 gene product from transcript CG42644-RA	-3.22848	5.14214	-28.0397	1.61e-19	6.77e-15	31.1475
165	47	0	CUST_1181_PI428323385	CG10541	Probe	38653	Tektin-C	Tektin C	5.1041	8.02243	23.3713	9.9e-18	1.95e-13	28.2804
140	119	0	CUST_16064_PI428323385	CG2849	Probe	31332	Rala	Ras-related protein	3.03996	8.62267	23.0249	1.38e-17	1.95e-13	28.0327
58	52	0	CUST_16061_PI428323385	CG2849	Probe	31332	Rala	Ras-related protein	2.93421	8.66528	22.7115	1.88e-17	1.99e-13	27.8038
71	52	0	CUST_16063_PI428323385	CG2849	Probe	31332	Rala	Ras-related protein	3.02329	8.55139	20.3008	2.3e-16	1.94e-12	25.879
172	164	0	CUST_16062_PI428323385	CG2849	Probe	31332	Rala	Ras-related protein	2.96306	8.5146	19.3745	6.48e-16	4.56e-12	25.0541
296	93	0	CUST_26169_PI428323385	CG42330	Probe	2769008	Dscam4	Down syndrome cell adhesion molecule 4	3.65926	6.95919	19.062	9.28e-16	5.59e-12	24.7641
24	56	0	CUST_11076_PI428323385	CG15892	Probe	3772603	CG15892	CG15892 gene product from transcript CG15892-RB	-1.79796	6.12757	-18.8322	1.21e-15	6.31e-12	24.5468
254	124	0	CUST_1182_PI428323385	CG10541	Probe	38653	Tektin-C	Tektin C	5.26121	7.86789	18.743	1.35e-15	6.31e-12	24.4615
343	58	0	CUST_8483_PI428323385	CG14394	Probe	41568	CG14394	CG14394 gene product from transcript CG14394-RB	2.34065	8.37763	18.4407	1.92e-15	8.12e-12	24.1687
379	95	0	CUST_32390_PI428323385	CG5671	Probe	43991	Pten	CG5671 gene product from transcript CG5671-RB	3.99948	8.40939	18.3017	2.27e-15	8.5e-12	24.032
188	152	0	CUST_18159_PI428323385	CG31436	Probe	318734	CG31436	CG31436 gene product from transcript CG31436-RA	2.98548	8.50738	18.2503	2.42e-15	8.5e-12	23.9812
52	164	0	CUST_9080_PI428323385	CG14715	Probe	41403	CG14715	CG14715 gene product from transcript CG14715-RA	1.83534	12.398	17.3488	7.31e-15	2.37e-11	23.0588
222	122	0	CUST_3534_PI428323385	CG11584	Probe	32363	CG11584	CG11584 gene product from transcript CG11584-RB	-2.1753	6.7413	-17.0131	1.12e-14	3.37e-11	22.7003
339	59	0	CUST_8487_PI428323385	CG14394	Probe	41568	CG14394	CG14394 gene product from transcript CG14394-RB	2.42525	8.31709	16.7676	1.53e-14	4.31e-11	22.4327
257	127	0	CUST_18836_PI428323385	CG31809	Probe	318954	CG31809	CG31809 gene product from transcript CG31809-RB	1.75802	6.84728	16.3318	2.71e-14	6.96e-11	21.9461
323	16	0	CUST_9079_PI428323385	CG14715	Probe	41403	CG14715	CG14715 gene product from transcript CG14715-RA	1.85237	12.0964	16.3068	2.8e-14	6.96e-11	21.9177
273	98	0	CUST_30069_PI428323385	CG4594	Probe	34316	CG4594	CG4594 gene product from transcript CG4594-RA	-2.96185	8.21672	-16.1927	3.26e-14	7.33e-11	21.7876
157	41	0	CUST_8488_PI428323385	CG14394	Probe	41568	CG14394	CG14394 gene product from transcript CG14394-RB	2.42583	8.1707	16.1837	3.3e-14	7.33e-11	21.7773
382	95	0	CUST_32388_PI428323385	CG5671	Probe	43991	Pten	CG5671 gene product from transcript CG5671-RB	3.99001	8.42609	15.611	7.16e-14	1.51e-10	21.1074
36	49	0	CUST_19857_PI428323385	CG32364	Probe	317996	CG32364	CG32364 gene product from transcript CG32364-RA	2.30836	10.274	15.2553	1.17e-13	2.36e-10	20.6773
33	16	0	CUST_17170_PI428323385	CG30488	Probe	246647	CG30488	CG30488 gene product from transcript CG30488-RA	1.4655	5.46437	15.0512	1.56e-13	3e-10	20.4256
182	128	0	CUST_28221_PI428323385	CG43144	Probe	12798035	CG43144	CG43144 gene product from transcript CG43144-RB	-1.83713	8.5435	-14.921	1.88e-13	3.45e-10	20.2629
1	87	0	CUST_26174_PI428323385	CG42330	Probe	2769008	Dscam4	Down syndrome cell adhesion molecule 4	2.78515	6.51437	14.8733	2.01e-13	3.54e-10	20.2029
311	18	0	CUST_40664_PI428323385	CG9333	Probe	35349	Oseg5	CG9333 gene product from transcript CG9333-RB	2.33816	6.28203	14.6518	2.77e-13	4.67e-10	19.9218
249	3	0	CUST_18835_PI428323385	CG31809	Probe	318954	CG31809	CG31809 gene product from transcript CG31809-RB	1.53498	6.64584	14.4453	3.74e-13	6.07e-10	19.6555
105	146	0	CUST_18839_PI428323385	CG31810	Probe	318955	CG31810	CG31810 gene product from transcript CG31810-RA	1.54406	6.33227	14.2219	5.2e-13	8.12e-10	19.3628
228	95	0	CUST_10919_PI428323385	CG15784	Probe	31461	CG15784	CG15784 gene product from transcript CG15784-RA	-3.31471	8.78475	-14.0455	6.76e-13	9.87e-10	19.1284
102	77	0	CUST_26170_PI428323385	CG42330	Probe	2769008	Dscam4	Down syndrome cell adhesion molecule 4	2.82402	6.48281	14.0426	6.79e-13	9.87e-10	19.1245
53	70	0	CUST_7499_PI428323385	CG13890	Probe	38100	CG13890	CG13890 gene product from transcript CG13890-RA	1.27737	10.0936	13.8821	8.64e-13	1.21e-09	18.9085
171	13	0	CUST_40663_PI428323385	CG9333	Probe	35349	Oseg5	CG9333 gene product from transcript CG9333-RB	2.54994	6.30981	13.8154	9.56e-13	1.3e-09	18.8178
5	63	0	CUST_26173_PI428323385	CG42330	Probe	2769008	Dscam4	Down syndrome cell adhesion molecule 4	3.47824	7.06336	13.7375	1.08e-12	1.42e-09	18.7115
89	70	0	CUST_17168_PI428323385	CG30488	Probe	246647	CG30488	CG30488 gene product from transcript CG30488-RA	1.49724	5.55649	13.588	1.35e-12	1.73e-09	18.5057
76	22	0	CUST_23017_PI428323385	CG34215	Probe	5740170	CG34215	CG34215 gene product from transcript CG34215-RA	2.83172	6.72586	12.7985	4.68e-12	5.81e-09	17.3802
65	157	0	CUST_18160_PI428323385	CG31436	Probe	318734	CG31436	CG31436 gene product from transcript CG31436-RA	1.96041	6.60368	12.7385	5.16e-12	6.21e-09	17.292
158	119	0	CUST_8486_PI428323385	CG14394	Probe	41568	CG14394	CG14394 gene product from transcript CG14394-RB	1.55186	7.16497	12.7101	5.4e-12	6.33e-09	17.2501
342	112	0	CUST_3532_PI428323385	CG11584	Probe	32363	CG11584	CG11584 gene product from transcript CG11584-RB	-2.1557	6.80578	-12.6835	5.64e-12	6.43e-09	17.2107
178	155	0	CUST_2481_PI428323385	CG11086	Probe	35646	Gadd45	CG11086 gene product from transcript CG11086-RA	-1.63283	8.30806	-12.6156	6.29e-12	6.99e-09	17.1099
141	10	0	CUST_10112_PI428323385	CG15236	Probe	35595	CG15236	CG15236 gene product from transcript CG15236-RB	1.73993	5.22258	12.5792	6.68e-12	7.22e-09	17.0557
316	142	0	CUST_30010_PI428323385	CG4570	Probe	41306	CG4570	CG4570 gene product from transcript CG4570-RA	2.14555	7.42789	12.4357	8.45e-12	8.91e-09	16.8403
150	150	0	CUST_2482_PI428323385	CG11086	Probe	35646	Gadd45	CG11086 gene product from transcript CG11086-RA	-1.69706	8.18818	-12.2352	1.18e-11	1.21e-08	16.5356
15	58	0	CUST_4672_PI428323385	CG12182	Probe	38324	CG12182	CG12182 gene product from transcript CG12182-RA	0.958136	9.10905	12.2079	1.23e-11	1.24e-08	16.4936
56	159	0	CUST_4727_PI428323385	CG1221	Probe	38047	miple	CG1221 gene product from transcript CG1221-RA	-1.01885	11.7684	-12.1755	1.3e-11	1.28e-08	16.4439
38	126	0	CUST_38982_PI428323385	CG8573	Probe	41740	su(Hw)	suppressor of Hairy wing	-1.03237	11.1248	-12.0238	1.68e-11	1.58e-08	16.2092
167	91	0	CUST_23018_PI428323385	CG34215	Probe	5740170	CG34215	CG34215 gene product from transcript CG34215-RA	2.70919	6.64645	12.0196	1.69e-11	1.58e-08	16.2027
8	47	0	CUST_28222_PI428323385	CG43144	Probe	12798035	CG43144	CG43144 gene product from transcript CG43144-RB	-1.75491	8.65617	-11.956	1.88e-11	1.72e-08	16.1033
68	36	0	CUST_26171_PI428323385	CG42330	Probe	2769008	Dscam4	Down syndrome cell adhesion molecule 4	1.7437	5.31233	11.9185	2e-11	1.8e-08	16.0445
19	100	0	CUST_31217_PI428323385	CG5096	Probe	34410	CG5096	CG5096 gene product from transcript CG5096-RA	-2.19136	6.73261	-11.7863	2.51e-11	2.21e-08	15.8361
89	147	0	CUST_8480_PI428323385	CG14394	Probe	41568	CG14394	CG14394 gene product from transcript CG14394-RB	1.57584	6.04481	11.7307	2.76e-11	2.38e-08	15.7478
316	61	0	CUST_34550_PI428323385	CG6665	Probe	36903	CG6665	CG6665 gene product from transcript CG6665-RA	-1.23195	8.4271	-11.6098	3.4e-11	2.87e-08	15.5546
285	99	0	CUST_8489_PI428323385	CG14394	Probe	41568	CG14394	CG14394 gene product from transcript CG14394-RB	1.13824	6.01602	11.5741	3.62e-11	2.99e-08	15.4972
234	24	0	CUST_20117_PI428323385	CG32475	Probe	38013	mthl8	methuselah-like 8	-1.56877	7.48996	-11.4059	4.85e-11	3.93e-08	15.2246
88	11	0	CUST_4728_PI428323385	CG1221	Probe	38047	miple	CG1221 gene product from transcript CG1221-RA	-1.0372	11.6595	-11.3612	5.25e-11	4.18e-08	15.1516
189	23	0	CUST_8482_PI428323385	CG14394	Probe	41568	CG14394	CG14394 gene product from transcript CG14394-RB	1.74807	6.2977	11.1333	7.85e-11	6.13e-08	14.7754
262	48	0	CUST_29046_PI428323385	CG43676	Probe	NA	NA	NA	-1.3054	4.7585	-10.9405	1.11e-10	8.51e-08	14.4519
221	136	0	CUST_2859_PI428323385	CG11263	Probe	39472	CG11263	CG11263 gene product from transcript CG11263-RA	1.03005	6.43731	10.6503	1.88e-10	1.42e-07	13.9562
234	36	0	CUST_34532_PI428323385	CG6658	Probe	53502	Ugt86Di	CG6658 gene product from transcript CG6658-RA	-1.20766	10.07	-10.6175	2e-10	1.48e-07	13.8996
299	96	0	CUST_25021_PI428323385	CG40178	Probe	3354941	CG40178	CG40178 gene product from transcript CG40178-RA	1.14158	8.14155	10.5822	2.13e-10	1.53e-07	13.8383
2	122	0	CUST_4674_PI428323385	CG12182	Probe	38324	CG12182	CG12182 gene product from transcript CG12182-RA	0.947239	9.12498	10.5786	2.15e-10	1.53e-07	13.832
347	38	0	CUST_36472_PI428323385	CG7478	Probe	40444	Act79B	Actin 79B	1.26351	10.2911	10.5486	2.27e-10	1.59e-07	13.7798
47	132	0	CUST_13910_PI428323385	CG18188	Probe	36266	Damm	Death associated molecule related to Mch2	-1.55528	6.08998	-10.5344	2.33e-10	1.61e-07	13.7552
92	132	0	CUST_14383_PI428323385	CG1851	Probe	44750	Ady43A	CG1851 gene product from transcript CG1851-RA	-0.96701	9.8512	-10.5052	2.46e-10	1.67e-07	13.7041
217	23	0	CUST_13909_PI428323385	CG18188	Probe	36266	Damm	Death associated molecule related to Mch2	-1.57811	6.02327	-10.3316	3.4e-10	2.27e-07	13.399
342	111	0	CUST_25022_PI428323385	CG40178	Probe	3354941	CG40178	CG40178 gene product from transcript CG40178-RA	1.28173	8.46516	10.2856	3.7e-10	2.44e-07	13.3174
216	120	0	CUST_21262_PI428323385	CG33140	Probe	35642	CG33140	CG33140 gene product from transcript CG33140-RA	1.42604	6.63869	10.1799	4.52e-10	2.93e-07	13.129
123	39	0	CUST_36751_PI428323385	CG7607	Probe	39263	CG7607	CG7607 gene product from transcript CG7607-RA	1.61417	5.9423	10.163	4.67e-10	2.98e-07	13.0987
52	76	0	CUST_124_PI428323385	CG10067	Probe	37368	Act57B	Actin 57B	0.968042	13.7429	10.1518	4.77e-10	3e-07	13.0786
1	49	0	CUST_4335_PI428323385	CG12047	Probe	44839	mud	mushroom body defect	0.840552	6.431	10.0995	5.27e-10	3.27e-07	12.9847
5	131	0	CUST_35466_PI428323385	CG7035	Probe	44409	Cbp80	cap binding protein 80	-1.13443	10.8557	-9.90155	7.69e-10	4.7e-07	12.6255
362	116	0	CUST_10111_PI428323385	CG15236	Probe	35595	CG15236	CG15236 gene product from transcript CG15236-RB	1.50477	5.26337	9.88784	7.9e-10	4.76e-07	12.6004
245	77	0	CUST_8484_PI428323385	CG14394	Probe	41568	CG14394	CG14394 gene product from transcript CG14394-RB	2.18437	8.37146	9.86545	8.25e-10	4.9e-07	12.5594
323	145	0	CUST_1252_PI428323385	CG10576	Probe	38645	CG10576	CG10576 gene product from transcript CG10576-RA	1.21978	11.6746	9.84126	8.64e-10	5.02e-07	12.515
40	39	0	CUST_33119_PI428323385	CG6013	Probe	42286	CG6013	CG6013 gene product from transcript CG6013-RA	1.18067	10.1515	9.83797	8.69e-10	5.02e-07	12.509
267	29	0	CUST_8481_PI428323385	CG14394	Probe	41568	CG14394	CG14394 gene product from transcript CG14394-RB	1.73171	6.33519	9.74556	1.04e-09	5.93e-07	12.3387
173	123	0	CUST_11907_PI428323385	CG17077	Probe	42757	pnt	pointed	1.26213	8.32191	9.6971	1.14e-09	6.35e-07	12.2489
18	6	0	CUST_21658_PI428323385	CG33302	Probe	2768918	Cpr31A	Cuticular protein 31A	1.4644	6.93947	9.6967	1.14e-09	6.35e-07	12.2482
291	164	0	CUST_4765_PI428323385	CG12224	Probe	41453	CG12224	CG12224 gene product from transcript CG12224-RB	-1.73045	8.99589	-9.6249	1.32e-09	7.21e-07	12.1145
83	56	0	CUST_14300_PI428323385	CG18455	Probe	44108	Optix	CG18455 gene product from transcript CG18455-RA	-1.19944	6.134	-9.59318	1.4e-09	7.58e-07	12.0552
30	113	0	CUST_24200_PI428323385	CG3649	Probe	37626	CG3649	CG3649 gene product from transcript CG3649-RB	1.60806	9.96037	9.48189	1.74e-09	9.25e-07	11.8461
338	70	0	CUST_4671_PI428323385	CG12182	Probe	38324	CG12182	CG12182 gene product from transcript CG12182-RA	0.798146	10.3021	9.47905	1.75e-09	9.25e-07	11.8408
11	155	0	CUST_31218_PI428323385	CG5096	Probe	34410	CG5096	CG5096 gene product from transcript CG5096-RA	-1.75306	6.31108	-9.43696	1.91e-09	9.93e-07	11.7613
352	27	0	CUST_4673_PI428323385	CG12182	Probe	38324	CG12182	CG12182 gene product from transcript CG12182-RA	0.82826	10.2894	9.40747	2.02e-09	1.04e-06	11.7054
225	147	0	CUST_22495_PI428323385	CG3397	Probe	41454	CG3397	CG3397 gene product from transcript CG3397-RA	-1.4838	8.35543	-9.39325	2.08e-09	1.06e-06	11.6784
297	75	0	CUST_35137_PI428323385	CG6912	Probe	41820	CG6912	CG6912 gene product from transcript CG6912-RA	-1.7639	9.93502	-9.38601	2.11e-09	1.06e-06	11.6646
164	110	0	CUST_37606_PI428323385	CG8023	Probe	38923	eIF4E-3	CG8023 gene product from transcript CG8023-RA	1.34507	5.17484	9.36283	2.21e-09	1.1e-06	11.6206
143	106	0	CUST_25265_PI428323385	CG4086	Probe	39856	Su(P)	Suppressor of ref(2)P sterility	1.58021	10.0285	9.35319	2.25e-09	1.11e-06	11.6022
60	154	0	CUST_5030_PI428323385	CG12367	Probe	36301	Hen1	CG12367 gene product from transcript CG12367-RA	-1.07139	6.11424	-9.33881	2.32e-09	1.12e-06	11.5748
307	60	0	CUST_36310_PI428323385	CG7408	Probe	39991	CG7408	CG7408 gene product from transcript CG7408-RB	0.861045	8.23565	9.32363	2.39e-09	1.15e-06	11.5458
191	139	0	CUST_35465_PI428323385	CG7035	Probe	44409	Cbp80	cap binding protein 80	-1.04677	10.5966	-9.17743	3.21e-09	1.51e-06	11.2652
203	132	0	CUST_12699_PI428323385	CG17533	Probe	37113	GstE8	Glutathione S transferase E8	-1.46944	8.6557	-9.17601	3.22e-09	1.51e-06	11.2625
58	151	0	CUST_11206_PI428323385	CG1637	Probe	32019	CG1637	CG1637 gene product from transcript CG1637-RC	0.632766	9.65392	9.13462	3.5e-09	1.62e-06	11.1825
128	162	0	CUST_34531_PI428323385	CG6658	Probe	53502	Ugt86Di	CG6658 gene product from transcript CG6658-RA	-1.1204	9.24573	-9.09154	3.81e-09	1.75e-06	11.099
258	13	0	CUST_8479_PI428323385	CG14394	Probe	41568	CG14394	CG14394 gene product from transcript CG14394-RB	1.53263	5.8979	9.08345	3.88e-09	1.76e-06	11.0833
83	36	0	CUST_6148_PI428323385	CG13083	Probe	35230	CG13083	CG13083 gene product from transcript CG13083-RB	1.31002	5.00917	9.05694	4.09e-09	1.84e-06	11.0317
297	149	0	CUST_15352_PI428323385	CG2161	Probe	40683	Rga	Regena	1.18888	12.2015	9.01852	4.42e-09	1.96e-06	10.9568
107	54	0	CUST_29045_PI428323385	CG43676	Probe	NA	NA	NA	-1.08128	4.73583	-8.97227	4.86e-09	2.14e-06	10.8663
23	4	0	CUST_41533_PI428323385	CG9733	Probe	43601	CG9733	CG9733 gene product from transcript CG9733-RA	-0.759336	7.92228	-8.89492	5.7e-09	2.48e-06	10.7144
51	37	0	CUST_4766_PI428323385	CG12224	Probe	41453	CG12224	CG12224 gene product from transcript CG12224-RB	-1.72791	8.96426	-8.85577	6.18e-09	2.66e-06	10.6371
176	89	0	CUST_27032_PI428323385	CG42644	Probe	10178858	CG42644	CG42644 gene product from transcript CG42644-RA	-2.44453	5.15219	-8.83372	6.46e-09	2.73e-06	10.5935
77	124	0	CUST_32470_PI428323385	CG5704	Probe	48613	CG5704	CG5704 gene product from transcript CG5704-RA	0.877539	9.57144	8.83227	6.48e-09	2.73e-06	10.5906
195	128	0	CUST_36577_PI428323385	CG7532	Probe	34838	l(2)34Fc	lethal (2) 34Fc	1.62792	11.3591	8.79772	6.96e-09	2.91e-06	10.5222
251	115	0	CUST_21261_PI428323385	CG33140	Probe	35642	CG33140	CG33140 gene product from transcript CG33140-RA	1.36735	6.1565	8.73894	7.86e-09	3.25e-06	10.4053
158	110	0	CUST_8490_PI428323385	CG14394	Probe	41568	CG14394	CG14394 gene product from transcript CG14394-RB	1.35327	6.11705	8.7193	8.19e-09	3.35e-06	10.3661
8	114	0	CUST_35138_PI428323385	CG6912	Probe	41820	CG6912	CG6912 gene product from transcript CG6912-RA	-1.61966	9.51014	-8.69753	8.57e-09	3.48e-06	10.3227
180	61	0	CUST_5028_PI428323385	CG12367	Probe	36301	Hen1	CG12367 gene product from transcript CG12367-RA	-1.0355	6.14194	-8.63745	9.71e-09	3.9e-06	10.2023
105	63	0	CUST_25402_PI428323385	CG41320	Probe	5740635	CG41320	CG41320 gene product from transcript CG41320-RA	1.27938	9.13001	8.57928	1.1e-08	4.37e-06	10.0853
9	120	0	CUST_23139_PI428323385	CG34278	Probe	5740656	CG34278	CG34278 gene product from transcript CG34278-RA	0.962001	6.23922	8.51704	1.25e-08	4.93e-06	9.95955
59	122	0	CUST_38706_PI428323385	CG8454	Probe	41107	Vps16A	Vacuolar protein sorting 16A	-0.531685	9.83161	-8.49914	1.3e-08	5.07e-06	9.92328
111	43	0	CUST_31489_PI428323385	CG5229	Probe	43928	chm	chameau	-1.75309	6.31206	-8.46379	1.4e-08	5.38e-06	9.85151
251	122	0	CUST_28100_PI428323385	CG43117	Probe	12798272	CG43117	CG43117 gene product from transcript CG43117-RB	1.18805	7.7773	8.46234	1.4e-08	5.38e-06	9.84856
379	110	0	CUST_17258_PI428323385	CG3081	Probe	31395	CG3081	CG3081 gene product from transcript CG3081-RA	-1.66877	6.07874	-8.43244	1.49e-08	5.68e-06	9.78772
166	32	0	CUST_8485_PI428323385	CG14394	Probe	41568	CG14394	CG14394 gene product from transcript CG14394-RB	1.31374	7.34024	8.35526	1.76e-08	6.63e-06	9.63005
299	91	0	CUST_30711_PI428323385	CG4880	Probe	32680	CG4880	CG4880 gene product from transcript CG4880-RA	0.717746	10.2548	8.2229	2.33e-08	8.71e-06	9.35764
274	90	0	CUST_14384_PI428323385	CG1851	Probe	44750	Ady43A	CG1851 gene product from transcript CG1851-RA	-0.934543	9.1047	-8.17059	2.61e-08	9.66e-06	9.24929
22	158	0	CUST_14024_PI428323385	CG18278	Probe	36487	CG18278	CG18278 gene product from transcript CG18278-RA	-0.995614	10.3972	-8.15595	2.7e-08	9.89e-06	9.2189
20	119	0	CUST_7516_PI428323385	CG13897	Probe	38090	CG13897	CG13897 gene product from transcript CG13897-RA	1.16614	8.23502	8.14797	2.74e-08	9.97e-06	9.20231
30	67	0	CUST_21657_PI428323385	CG33302	Probe	2768918	Cpr31A	Cuticular protein 31A	1.12741	7.23208	8.0402	3.46e-08	1.25e-05	8.97745
76	29	0	CUST_28024_PI428323385	CG43079	Probe	40515	nrm	neuromusculin	1.12801	6.12251	8.01079	3.69e-08	1.32e-05	8.91581
319	126	0	CUST_25532_PI428323385	CG4174	Probe	40023	CG4174	CG4174 gene product from transcript CG4174-RB	-0.90631	5.26999	-7.97822	3.96e-08	1.4e-05	8.84739
25	11	0	CUST_9052_PI428323385	CG14694	Probe	41307	CG14694	CG14694 gene product from transcript CG14694-RA	0.812225	5.07544	7.96585	4.07e-08	1.42e-05	8.82136
137	134	0	CUST_4698_PI428323385	CG12199	Probe	32930	kek5	kekkon5	-0.681058	9.7207	-7.96446	4.08e-08	1.42e-05	8.81841
88	100	0	CUST_17167_PI428323385	CG30488	Probe	246647	CG30488	CG30488 gene product from transcript CG30488-RA	0.922146	5.67012	7.96113	4.11e-08	1.42e-05	8.81141
138	125	0	CUST_35803_PI428323385	CG7173	Probe	40392	CG7173	CG7173 gene product from transcript CG7173-RA	-0.899574	9.36902	-7.95161	4.2e-08	1.44e-05	8.79136
340	87	0	CUST_10816_PI428323385	CG15707	Probe	36804	krimp	krimper	1.79274	8.01914	7.92502	4.45e-08	1.51e-05	8.73528
27	148	0	CUST_26172_PI428323385	CG42330	Probe	2769008	Dscam4	Down syndrome cell adhesion molecule 4	1.54217	5.36074	7.9057	4.64e-08	1.57e-05	8.69447
111	161	0	CUST_11905_PI428323385	CG17077	Probe	42757	pnt	pointed	1.12767	8.22262	7.89089	4.79e-08	1.6e-05	8.66315
58	80	0	CUST_4336_PI428323385	CG12047	Probe	44839	mud	mushroom body defect	0.724157	6.14692	7.86075	5.12e-08	1.7e-05	8.59931
280	42	0	CUST_25046_PI428323385	CG40218	Probe	7354404	Yeti	CG40218 gene product from transcript CG40218-RA	-0.586274	13.3569	-7.85761	5.15e-08	1.7e-05	8.59265
277	48	0	CUST_36752_PI428323385	CG7607	Probe	39263	CG7607	CG7607 gene product from transcript CG7607-RA	1.2933	5.52449	7.82673	5.51e-08	1.79e-05	8.52711
28	120	0	CUST_28987_PI428323385	CG43646	Probe	NA	NA	NA	-1.22389	5.50801	-7.82139	5.58e-08	1.79e-05	8.51576
340	116	0	CUST_11908_PI428323385	CG17077	Probe	42757	pnt	pointed	1.06896	8.1841	7.8209	5.58e-08	1.79e-05	8.51472
264	103	0	CUST_36309_PI428323385	CG7408	Probe	39991	CG7408	CG7408 gene product from transcript CG7408-RB	0.753586	7.53627	7.82076	5.59e-08	1.79e-05	8.5144
262	37	0	CUST_16446_PI428323385	CG30059	Probe	246425	CG30059	CG30059 gene product from transcript CG30059-RA	-0.993782	10.5237	-7.81021	5.72e-08	1.81e-05	8.49198
29	119	0	CUST_28017_PI428323385	CG43079	Probe	40515	nrm	neuromusculin	0.960885	5.7262	7.80454	5.79e-08	1.82e-05	8.47991
206	43	0	CUST_30009_PI428323385	CG4570	Probe	41306	CG4570	CG4570 gene product from transcript CG4570-RA	1.12029	5.83113	7.72731	6.86e-08	2.14e-05	8.31511
13	102	0	CUST_39408_PI428323385	CG8768	Probe	36400	CG8768	CG8768 gene product from transcript CG8768-RA	0.982923	8.83305	7.71291	7.08e-08	2.2e-05	8.28429
155	99	0	CUST_31087_PI428323385	CG5022	Probe	34398	CG5022	CG5022 gene product from transcript CG5022-RA	-1.31594	7.7234	-7.69099	7.44e-08	2.29e-05	8.23731
14	126	0	CUST_33271_PI428323385	CG6084	Probe	39304	CG6084	CG6084 gene product from transcript CG6084-RB	-0.663581	11.8177	-7.68306	7.57e-08	2.31e-05	8.22031
149	110	0	CUST_16445_PI428323385	CG30059	Probe	246425	CG30059	CG30059 gene product from transcript CG30059-RA	-1.00558	10.3457	-7.67267	7.74e-08	2.35e-05	8.198
8	20	0	CUST_7606_PI428323385	CG13937	Probe	38249	CG13937	CG13937 gene product from transcript CG13937-RD	-1.27704	6.48493	-7.65087	8.13e-08	2.45e-05	8.15115
158	23	0	CUST_11910_PI428323385	CG17077	Probe	42757	pnt	pointed	1.16117	8.25303	7.64316	8.27e-08	2.47e-05	8.13457
65	147	0	CUST_15704_PI428323385	CG2488	Probe	35322	phr6-4	(6-4)-photolyase	0.902092	7.26811	7.62479	8.61e-08	2.54e-05	8.09502
338	121	0	CUST_28074_PI428323385	CG43103	Probe	12798325	CG43103	CG43103 gene product from transcript CG43103-RA	1.83792	8.01338	7.62427	8.62e-08	2.54e-05	8.09391
63	77	0	CUST_18989_PI428323385	CG31918	Probe	326172	CG31918	CG31918 gene product from transcript CG31918-RA	0.67374	10.4643	7.61216	8.86e-08	2.6e-05	8.0678
6	123	0	CUST_11205_PI428323385	CG1637	Probe	32019	CG1637	CG1637 gene product from transcript CG1637-RC	0.645577	9.58928	7.59794	9.14e-08	2.66e-05	8.03713
13	87	0	CUST_37605_PI428323385	CG8023	Probe	38923	eIF4E-3	CG8023 gene product from transcript CG8023-RA	1.21548	5.06367	7.59331	9.24e-08	2.67e-05	8.02715
137	55	0	CUST_28988_PI428323385	CG43646	Probe	NA	NA	NA	-1.65418	5.54217	-7.57769	9.57e-08	2.75e-05	7.99341
76	104	0	CUST_33272_PI428323385	CG6084	Probe	39304	CG6084	CG6084 gene product from transcript CG6084-RB	-0.668582	11.7815	-7.54633	1.03e-07	2.92e-05	7.92557
374	147	0	CUST_24199_PI428323385	CG3649	Probe	37626	CG3649	CG3649 gene product from transcript CG3649-RB	1.61605	9.65597	7.52767	1.07e-07	3.03e-05	7.88515
141	126	0	CUST_7601_PI428323385	CG13937	Probe	38249	CG13937	CG13937 gene product from transcript CG13937-RD	-1.43452	6.45838	-7.51235	1.11e-07	3.11e-05	7.85191
86	119	0	CUST_11807_PI428323385	CG1702	Probe	33047	CG1702	CG1702 gene product from transcript CG1702-RB	-0.92499	10.8975	-7.49099	1.16e-07	3.24e-05	7.80554
51	123	0	CUST_7603_PI428323385	CG13937	Probe	38249	CG13937	CG13937 gene product from transcript CG13937-RD	-1.47525	6.44693	-7.48503	1.18e-07	3.27e-05	7.79257
355	91	0	CUST_8241_PI428323385	CG14257	Probe	43257	CG14257	CG14257 gene product from transcript CG14257-RB	0.78004	10.4909	7.47155	1.21e-07	3.34e-05	7.76325
41	8	0	CUST_36578_PI428323385	CG7532	Probe	34838	l(2)34Fc	lethal (2) 34Fc	1.56726	11.2849	7.45069	1.27e-07	3.48e-05	7.71783
95	120	0	CUST_25528_PI428323385	CG4174	Probe	40023	CG4174	CG4174 gene product from transcript CG4174-RB	-0.919064	5.13903	-7.39962	1.43e-07	3.88e-05	7.60637
311	93	0	CUST_34526_PI428323385	CG6656	Probe	42576	CG6656	CG6656 gene product from transcript CG6656-RA	0.560321	9.93215	7.38617	1.47e-07	3.97e-05	7.57696
127	36	0	CUST_11097_PI428323385	CG15905	Probe	37257	CG15905	CG15905 gene product from transcript CG15905-RB	0.724841	13.6643	7.34415	1.62e-07	4.34e-05	7.48489
353	31	0	CUST_25031_PI428323385	CG40191	Probe	3354930	CG40191	CG40191 gene product from transcript CG40191-RC	-0.556349	11.8588	-7.32872	1.67e-07	4.47e-05	7.45104
92	87	0	CUST_31333_PI428323385	CG5164	Probe	37106	GstE1	Glutathione S transferase E1	0.81265	10.3923	7.31279	1.73e-07	4.59e-05	7.41603
199	22	0	CUST_3187_PI428323385	CG11400	Probe	36935	CG11400	CG11400 gene product from transcript CG11400-RA	0.928619	6.7934	7.31134	1.74e-07	4.59e-05	7.41284
269	32	0	CUST_2838_PI428323385	CG11253	Probe	39481	CG11253	CG11253 gene product from transcript CG11253-RA	1.11248	7.97216	7.28335	1.85e-07	4.86e-05	7.35126
65	109	0	CUST_17169_PI428323385	CG30488	Probe	246647	CG30488	CG30488 gene product from transcript CG30488-RA	0.919904	5.68864	7.27135	1.91e-07	4.96e-05	7.32482
73	111	0	CUST_28099_PI428323385	CG43117	Probe	12798272	CG43117	CG43117 gene product from transcript CG43117-RB	1.18589	7.85199	7.2663	1.93e-07	4.98e-05	7.31369
69	73	0	CUST_41534_PI428323385	CG9733	Probe	43601	CG9733	CG9733 gene product from transcript CG9733-RA	-0.717087	7.10383	-7.26455	1.93e-07	4.98e-05	7.30982
174	22	0	CUST_12696_PI428323385	CG17530	Probe	37111	GstE6	Glutathione S transferase E6	-1.36529	8.94386	-7.25687	1.97e-07	5.03e-05	7.29288
31	58	0	CUST_4697_PI428323385	CG12199	Probe	32930	kek5	kekkon5	-0.624869	9.82253	-7.23575	2.07e-07	5.25e-05	7.24626
52	152	0	CUST_7517_PI428323385	CG13897	Probe	38090	CG13897	CG13897 gene product from transcript CG13897-RA	1.10823	7.84288	7.21917	2.15e-07	5.4e-05	7.20961
204	36	0	CUST_10431_PI428323385	CG15444	Probe	33659	ine	inebriated	-0.844221	5.42652	-7.21702	2.16e-07	5.4e-05	7.20487
129	153	0	CUST_28073_PI428323385	CG43103	Probe	12798325	CG43103	CG43103 gene product from transcript CG43103-RA	1.83543	8.05596	7.2158	2.16e-07	5.4e-05	7.20217
53	94	0	CUST_12434_PI428323385	CG17332	Probe	34997	VhaSFD	Vacuolar H[+]-ATPase SFD subunit	0.529962	11.0697	7.20301	2.23e-07	5.52e-05	7.17386
101	105	0	CUST_11808_PI428323385	CG1702	Probe	33047	CG1702	CG1702 gene product from transcript CG1702-RB	-0.93765	10.5765	-7.18605	2.31e-07	5.71e-05	7.1363
32	42	0	CUST_25045_PI428323385	CG40218	Probe	7354404	Yeti	CG40218 gene product from transcript CG40218-RA	-0.582698	13.7441	-7.15115	2.5e-07	6.14e-05	7.05887
218	124	0	CUST_29998_PI428323385	CG4562	Probe	42362	CG4562	CG4562 gene product from transcript CG4562-RB	-0.796637	7.98563	-7.13961	2.57e-07	6.27e-05	7.03325
188	12	0	CUST_10350_PI428323385	CG15400	Probe	33476	CG15400	CG15400 gene product from transcript CG15400-RB	-0.983499	7.01401	-7.13442	2.6e-07	6.31e-05	7.02171
20	5	0	CUST_459_PI428323385	CG10200	Probe	36648	CG10200	CG10200 gene product from transcript CG10200-RB	0.605096	12.3683	7.12943	2.63e-07	6.35e-05	7.01061
262	157	0	CUST_11098_PI428323385	CG15905	Probe	37257	CG15905	CG15905 gene product from transcript CG15905-RB	0.759347	13.5781	7.07649	2.97e-07	7.12e-05	6.89269
323	102	0	CUST_13277_PI428323385	CG17803	Probe	42141	CG17803	CG17803 gene product from transcript CG17803-RA	-1.18746	7.40499	-7.0538	3.13e-07	7.46e-05	6.84205
96	78	0	CUST_7604_PI428323385	CG13937	Probe	38249	CG13937	CG13937 gene product from transcript CG13937-RD	-1.28129	6.44505	-7.00975	3.46e-07	8.21e-05	6.7435
50	158	0	CUST_33015_PI428323385	CG5953	Probe	34985	CG5953	CG5953 gene product from transcript CG5953-RA	-0.639266	4.98345	-7.0003	3.54e-07	8.34e-05	6.72233
76	41	0	CUST_7515_PI428323385	CG13897	Probe	38090	CG13897	CG13897 gene product from transcript CG13897-RA	1.07125	8.1037	6.99791	3.56e-07	8.34e-05	6.71698
95	149	0	CUST_16845_PI428323385	CG30323	Probe	246539	CG30323	CG30323 gene product from transcript CG30323-RB	-0.851743	4.83606	-6.98694	3.65e-07	8.48e-05	6.69239
38	8	0	CUST_11736_PI428323385	CG16979	Probe	39687	CG16979	CG16979 gene product from transcript CG16979-RA	0.570043	10.6232	6.98618	3.66e-07	8.48e-05	6.69067
132	46	0	CUST_41777_PI428323385	CG9841	Probe	37444	EfSec	CG9841 gene product from transcript CG9841-RA	-0.88429	7.90753	-6.98127	3.7e-07	8.53e-05	6.67966
346	136	0	CUST_11906_PI428323385	CG17077	Probe	42757	pnt	pointed	1.11215	8.12315	6.924	4.22e-07	9.68e-05	6.55094
74	27	0	CUST_16182_PI428323385	CG2924	Probe	31214	CG2924	CG2924 gene product from transcript CG2924-RA	-0.922834	8.26905	-6.91094	4.35e-07	9.93e-05	6.52153
379	9	0	CUST_20427_PI428323385	CG32581	Probe	318098	CG32581	CG32581 gene product from transcript CG32581-RB	-1.24673	8.87222	-6.88486	4.62e-07	0.000104707	6.4627
285	85	0	CUST_17321_PI428323385	CG31006	Probe	43683	stops	slow termination of phototransduction	-0.785842	6.03369	-6.88324	4.64e-07	0.000104707	6.45906
358	1	0	CUST_25530_PI428323385	CG4174	Probe	40023	CG4174	CG4174 gene product from transcript CG4174-RB	-0.787646	5.39563	-6.87349	4.75e-07	0.000106532	6.43705
121	93	0	CUST_7500_PI428323385	CG13890	Probe	38100	CG13890	CG13890 gene product from transcript CG13890-RA	1.28024	11.0436	6.86398	4.85e-07	0.000108333	6.41557
134	98	0	CUST_14299_PI428323385	CG18455	Probe	44108	Optix	CG18455 gene product from transcript CG18455-RA	-0.970793	6.29928	-6.85971	4.9e-07	0.000108836	6.40593
34	123	0	CUST_21443_PI428323385	CG33198	Probe	251430	pen-2	presenilin enhancer	-0.911267	9.51205	-6.85365	4.97e-07	0.000109802	6.39222
280	63	0	CUST_28022_PI428323385	CG43079	Probe	40515	nrm	neuromusculin	1.06888	6.37328	6.81269	5.47e-07	0.000120146	6.2995
132	95	0	CUST_34974_PI428323385	CG6831	Probe	38978	rhea	CG6831 gene product from transcript CG6831-RB	-0.591617	5.46952	-6.80059	5.62e-07	0.000122939	6.27208
349	19	0	CUST_21444_PI428323385	CG33198	Probe	251430	pen-2	presenilin enhancer	-0.87719	9.47641	-6.79329	5.72e-07	0.000124403	6.25552
152	113	0	CUST_30847_PI428323385	CG4920	Probe	41858	ea	easter	-1.07407	10.8905	-6.778	5.93e-07	0.000128257	6.22081
127	99	0	CUST_24030_PI428323385	CG3568	Probe	31383	CG3568	CG3568 gene product from transcript CG3568-RA	-1.09651	8.05318	-6.76184	6.16e-07	0.000132505	6.18411
159	36	0	CUST_33018_PI428323385	CG5953	Probe	34985	CG5953	CG5953 gene product from transcript CG5953-RA	-0.763766	4.79186	-6.75381	6.27e-07	0.000134329	6.16584
150	39	0	CUST_14420_PI428323385	CG18543	Probe	38958	mtrm	matrimony	-0.672099	6.18051	-6.73723	6.52e-07	0.000138929	6.12812
264	123	0	CUST_12695_PI428323385	CG17530	Probe	37111	GstE6	Glutathione S transferase E6	-1.34742	8.99247	-6.67294	7.58e-07	0.000160686	5.98154
365	110	0	CUST_22149_PI428323385	CG33653	Probe	49968	Caps	Calcium activated protein for secretion	-1.13292	6.4832	-6.66021	7.81e-07	0.000164731	5.95244
235	8	0	CUST_26626_PI428323385	CG42516	Probe	8674068	CG42516	CG42516 gene product from transcript CG42516-RB	-0.971596	6.19547	-6.63393	8.31e-07	0.000174345	5.89233
119	152	0	CUST_34278_PI428323385	CG6539	Probe	39195	Gem3	Gemin3	0.842653	9.63671	6.62954	8.39e-07	0.000175283	5.88227
371	163	0	CUST_22496_PI428323385	CG3397	Probe	41454	CG3397	CG3397 gene product from transcript CG3397-RA	-1.32873	8.30652	-6.59421	9.12e-07	0.000189535	5.80131
332	120	0	CUST_8421_PI428323385	CG1435	Probe	31669	CBP	sarcoplasmic calcium-binding protein	-0.639979	13.1156	-6.57871	9.46e-07	0.000195622	5.76572
348	32	0	CUST_12432_PI428323385	CG17332	Probe	34997	VhaSFD	Vacuolar H[+]-ATPase SFD subunit	0.577604	10.672	6.56042	9.88e-07	0.000203246	5.7237
57	64	0	CUST_34863_PI428323385	CG6785	Probe	34620	CG6785	CG6785 gene product from transcript CG6785-RA	-0.830726	6.87151	-6.55833	9.93e-07	0.000203259	5.7189
274	27	0	CUST_11735_PI428323385	CG16979	Probe	39687	CG16979	CG16979 gene product from transcript CG16979-RA	0.623766	10.6036	6.5368	1.04e-06	0.000212822	5.66938
253	121	0	CUST_36513_PI428323385	CG7506	Probe	38857	CG7506	CG7506 gene product from transcript CG7506-RA	0.708849	10.7217	6.52876	1.06e-06	0.000215862	5.65087
274	86	0	CUST_6510_PI428323385	CG1330	Probe	40821	Ccp84Ae	CG1330 gene product from transcript CG1330-RA	0.713791	5.3437	6.51806	1.09e-06	0.000220005	5.62623
67	9	0	CUST_14119_PI428323385	CG18343	Probe	36297	CG18343	CG18343 gene product from transcript CG18343-RA	0.611187	12.9538	6.51666	1.1e-06	0.000220005	5.62302
140	30	0	CUST_23577_PI428323385	CG34405	Probe	37981	NaCP60E	Na channel protein 60E	-0.486748	7.11243	-6.51118	1.11e-06	0.000221823	5.61037
152	35	0	CUST_25397_PI428323385	CG41284	Probe	5740851	CG41284	CG41284 gene product from transcript CG41284-RB	0.654446	7.46049	6.49598	1.15e-06	0.00022886	5.57533
92	64	0	CUST_12753_PI428323385	CG17574	Probe	36415	CG17574	CG17574 gene product from transcript CG17574-RA	-0.553234	9.73101	-6.49228	1.16e-06	0.000229787	5.5668
82	71	0	CUST_2837_PI428323385	CG11253	Probe	39481	CG11253	CG11253 gene product from transcript CG11253-RA	1.03141	8.05342	6.47211	1.22e-06	0.000239903	5.52025
59	121	0	CUST_39489_PI428323385	CG8799	Probe	47905	l(2)03659	lethal (2) 03659	-0.992118	6.65875	-6.46399	1.24e-06	0.000243426	5.5015
24	103	0	CUST_8242_PI428323385	CG14257	Probe	43257	CG14257	CG14257 gene product from transcript CG14257-RB	0.714242	10.4834	6.44775	1.29e-06	0.000251815	5.46396
45	1	0	CUST_35768_PI428323385	CG7154	Probe	34062	CG7154	CG7154 gene product from transcript CG7154-RA	-0.778374	8.97133	-6.42319	1.37e-06	0.000265702	5.40713
14	124	0	CUST_12739_PI428323385	CG17574	Probe	36415	CG17574	CG17574 gene product from transcript CG17574-RA	-0.501152	9.69506	-6.41081	1.41e-06	0.000272381	5.37845
269	18	0	CUST_14120_PI428323385	CG18343	Probe	36297	CG18343	CG18343 gene product from transcript CG18343-RA	0.576484	12.8349	6.40439	1.43e-06	0.000275303	5.36359
143	28	0	CUST_41646_PI428323385	CG9771	Probe	40579	Dip2	Dorsal interacting protein 2	0.593705	11.2298	6.39934	1.45e-06	0.000276677	5.35187
198	39	0	CUST_8240_PI428323385	CG14257	Probe	43257	CG14257	CG14257 gene product from transcript CG14257-RB	0.799763	8.10356	6.39848	1.45e-06	0.000276677	5.34987
288	82	0	CUST_19929_PI428323385	CG32409	Probe	318016	CG32409	CG32409 gene product from transcript CG32409-RA	0.709253	10.6642	6.39575	1.46e-06	0.000277221	5.34356
192	103	0	CUST_10815_PI428323385	CG15707	Probe	36804	krimp	krimper	1.57775	7.67632	6.36653	1.56e-06	0.000295859	5.27575
220	114	0	CUST_5319_PI428323385	CG12559	Probe	3354888	rl	rolled	-0.46644	9.67322	-6.36384	1.57e-06	0.000296428	5.26951
19	145	0	CUST_38792_PI428323385	CG8493	Probe	36339	Den1	Deneddylase 1	-0.689472	10.7497	-6.33197	1.7e-06	0.000318409	5.19543
127	133	0	CUST_26625_PI428323385	CG42516	Probe	8674068	CG42516	CG42516 gene product from transcript CG42516-RB	-0.731071	6.41599	-6.32315	1.73e-06	0.00032374	5.17492
118	18	0	CUST_31334_PI428323385	CG5164	Probe	37106	GstE1	Glutathione S transferase E1	0.870383	10.3581	6.30338	1.82e-06	0.000337898	5.12888
344	45	0	CUST_35804_PI428323385	CG7173	Probe	40392	CG7173	CG7173 gene product from transcript CG7173-RA	-0.74133	9.80761	-6.30116	1.83e-06	0.000338207	5.1237
318	11	0	CUST_5313_PI428323385	CG12559	Probe	3354888	rl	rolled	-0.765673	9.17373	-6.27696	1.94e-06	0.000356782	5.06731
123	97	0	CUST_16181_PI428323385	CG2924	Probe	31214	CG2924	CG2924 gene product from transcript CG2924-RA	-0.994723	8.00698	-6.2703	1.97e-06	0.000360937	5.05177
84	20	0	CUST_20856_PI428323385	CG32809	Probe	31121	CG32809	CG32809 gene product from transcript CG32809-RG	-0.685174	6.9467	-6.25717	2.03e-06	0.000370851	5.02111
151	113	0	CUST_20428_PI428323385	CG32581	Probe	318098	CG32581	CG32581 gene product from transcript CG32581-RB	-1.25365	8.8938	-6.24892	2.07e-06	0.000376618	5.00186
53	101	0	CUST_25401_PI428323385	CG41320	Probe	5740635	CG41320	CG41320 gene product from transcript CG41320-RA	0.828704	6.93401	6.23896	2.12e-06	0.000384057	4.97859
296	84	0	CUST_25082_PI428323385	CG40300	Probe	3355150	2003-08-01	Argonaute 3	-0.916469	6.95715	-6.22643	2.19e-06	0.000394075	4.9493
103	141	0	CUST_34879_PI428323385	CG6794	Probe	35045	Dif	Dorsal-related immunity factor	-1.12354	7.63123	-6.21849	2.23e-06	0.000399942	4.93073
314	11	0	CUST_6654_PI428323385	CG13380	Probe	40029	CG13380	CG13380 gene product from transcript CG13380-RB	-0.778817	5.40117	-6.21156	2.27e-06	0.000404926	4.91452
75	128	0	CUST_32469_PI428323385	CG5704	Probe	48613	CG5704	CG5704 gene product from transcript CG5704-RA	0.59103	9.61532	6.19978	2.33e-06	0.000414782	4.88694
92	6	0	CUST_23224_PI428323385	CG34313	Probe	5740766	CG34313	CG34313 gene product from transcript CG34313-RA	0.635253	5.11765	6.18106	2.44e-06	0.000431911	4.84308
320	121	0	CUST_39407_PI428323385	CG8768	Probe	36400	CG8768	CG8768 gene product from transcript CG8768-RA	0.910736	8.70458	6.17777	2.46e-06	0.000431911	4.83539
155	149	0	CUST_795_PI428323385	CG10344	Probe	37565	CG10344	CG10344 gene product from transcript CG10344-RA	1.11951	7.10454	6.1777	2.46e-06	0.000431911	4.83521
96	159	0	CUST_15353_PI428323385	CG2162	Probe	38360	CG2162	CG2162 gene product from transcript CG2162-RA	0.721951	9.11386	6.17156	2.49e-06	0.000433569	4.82082
61	161	0	CUST_25828_PI428323385	CG42272	Probe	318020	CG42272	CG42272 gene product from transcript CG42272-RC	0.702673	9.95622	6.17046	2.5e-06	0.000433569	4.81826
182	147	0	CUST_22147_PI428323385	CG33653	Probe	49968	Caps	Calcium activated protein for secretion	-1.08529	6.38077	-6.17025	2.5e-06	0.000433569	4.81775
124	8	0	CUST_34528_PI428323385	CG6656	Probe	42576	CG6656	CG6656 gene product from transcript CG6656-RA	0.590477	9.73149	6.16922	2.51e-06	0.000433569	4.81535
18	146	0	CUST_36179_PI428323385	CG7354	Probe	40001	mRpS26	mitochondrial ribosomal protein S26	1.03789	10.4091	6.16713	2.52e-06	0.000433978	4.81044
92	56	0	CUST_26892_PI428323385	CG42598	Probe	8674042	CG42598	CG42598 gene product from transcript CG42598-RA	0.714283	7.3154	6.16347	2.54e-06	0.000436039	4.80185
50	87	0	CUST_26780_PI428323385	CG42562	Probe	37008	CG42562	CG42562 gene product from transcript CG42562-RA	0.5672	6.47091	6.15999	2.56e-06	0.000437921	4.79369
121	160	0	CUST_7605_PI428323385	CG13937	Probe	38249	CG13937	CG13937 gene product from transcript CG13937-RD	-1.14095	6.49987	-6.13623	2.71e-06	0.000461825	4.73792
345	45	0	CUST_11845_PI428323385	CG17044	Probe	41652	yellow-e2	CG17044 gene product from transcript CG17044-RB	0.581116	10.53	6.12066	2.82e-06	0.000477546	4.70135
372	78	0	CUST_11806_PI428323385	CG1702	Probe	33047	CG1702	CG1702 gene product from transcript CG1702-RB	-0.886632	10.6056	-6.11356	2.87e-06	0.000483842	4.68467
301	103	0	CUST_15203_PI428323385	CG2086	Probe	38218	drpr	draper	-0.666771	5.54062	-6.09411	3e-06	0.000505049	4.63893
280	12	0	CUST_12436_PI428323385	CG17332	Probe	34997	VhaSFD	Vacuolar H[+]-ATPase SFD subunit	0.621803	10.3304	6.0894	3.04e-06	0.000508791	4.62785
123	79	0	CUST_10920_PI428323385	CG15784	Probe	31461	CG15784	CG15784 gene product from transcript CG15784-RA	-2.85559	10.8286	-6.08772	3.05e-06	0.000508849	4.62388
205	122	0	CUST_31915_PI428323385	CG5451	Probe	42272	CG5451	CG5451 gene product from transcript CG5451-RB	0.58641	10.8769	6.07496	3.15e-06	0.00052254	4.59385
195	157	0	CUST_14394_PI428323385	CG18522	Probe	41894	CG18522	CG18522 gene product from transcript CG18522-RA	-1.46182	6.47912	-6.07345	3.16e-06	0.00052254	4.59031
290	38	0	CUST_15356_PI428323385	CG2162	Probe	38360	CG2162	CG2162 gene product from transcript CG2162-RA	0.699078	8.93642	6.06769	3.2e-06	0.000524172	4.57673
72	75	0	CUST_8575_PI428323385	CG14434	Probe	31632	CG14434	CG14434 gene product from transcript CG14434-RA	0.540811	13.6981	6.06758	3.2e-06	0.000524172	4.57646
102	55	0	CUST_5317_PI428323385	CG12559	Probe	3354888	rl	rolled	-0.485345	9.74375	-6.06732	3.21e-06	0.000524172	4.57585
298	70	0	CUST_39824_PI428323385	CG8956	Probe	42043	Ahcy89E	Adenosylhomocysteinase 89E	0.810008	7.56609	6.04833	3.36e-06	0.000546662	4.5311
200	54	0	CUST_14023_PI428323385	CG18278	Probe	36487	CG18278	CG18278 gene product from transcript CG18278-RA	-0.998404	10.4896	-6.04406	3.39e-06	0.000550213	4.52103
148	141	0	CUST_25826_PI428323385	CG42272	Probe	318020	CG42272	CG42272 gene product from transcript CG42272-RC	0.742721	9.94173	6.04066	3.42e-06	0.000552178	4.51301
216	7	0	CUST_11805_PI428323385	CG1702	Probe	33047	CG1702	CG1702 gene product from transcript CG1702-RB	-0.909963	10.8169	-6.03942	3.43e-06	0.000552178	4.51008
79	116	0	CUST_34582_PI428323385	CG6677	Probe	42936	ash2	absent, small, or homeotic discs 2	0.413089	10.419	6.02776	3.53e-06	0.000564358	4.48259
337	30	0	CUST_12740_PI428323385	CG17574	Probe	36415	CG17574	CG17574 gene product from transcript CG17574-RA	-0.476333	9.61654	-6.02725	3.53e-06	0.000564358	4.48138
124	106	0	CUST_25387_PI428323385	CG4128	Probe	34304	nAcRalpha-30D	nicotinic Acetylcholine Receptor alpha 30D	-0.658106	4.78481	-6.00955	3.69e-06	0.000585788	4.43959
41	139	0	CUST_39487_PI428323385	CG8799	Probe	47905	l(2)03659	lethal (2) 03659	-0.917847	6.61524	-6.00868	3.69e-06	0.000585788	4.43753
226	5	0	CUST_22145_PI428323385	CG33653	Probe	49968	Caps	Calcium activated protein for secretion	-1.14028	6.3583	-6.00719	3.71e-06	0.000585788	4.43401
271	83	0	CUST_1000_PI428323385	CG10460	Probe	37229	cer	crammer	-0.820618	11.5904	-5.99957	3.78e-06	0.000594461	4.41602
241	103	0	CUST_37168_PI428323385	CG7831	Probe	43517	ncd	non-claret disjunctional	-0.497667	10.5829	-5.99711	3.8e-06	0.000595799	4.4102
73	104	0	CUST_1269_PI428323385	CG1058	Probe	40580	rpk	ripped pocket	-0.985797	8.19835	-5.98496	3.91e-06	0.000611327	4.38148
61	151	0	CUST_31916_PI428323385	CG5451	Probe	42272	CG5451	CG5451 gene product from transcript CG5451-RB	0.682869	10.7753	5.96052	4.15e-06	0.000646255	4.32368
136	72	0	CUST_7518_PI428323385	CG13897	Probe	38090	CG13897	CG13897 gene product from transcript CG13897-RA	1.00176	7.92594	5.95338	4.22e-06	0.000655133	4.30677
336	59	0	CUST_3816_PI428323385	CG11765	Probe	36098	Prx2540-2	Peroxiredoxin 2540-2	0.967215	8.74508	5.92835	4.49e-06	0.000691717	4.24747
285	123	0	CUST_5731_PI428323385	CG12843	Probe	35618	Tsp42Ei	Tetraspanin 42Ei	0.866637	7.80857	5.92799	4.49e-06	0.000691717	4.24662
320	74	0	CUST_3804_PI428323385	CG11759	Probe	32071	Kap3	Kinesin associated protein 3	0.500356	7.39256	5.90798	4.72e-06	0.00072355	4.19918
74	53	0	CUST_10762_PI428323385	CG15661	Probe	37421	CG15661	CG15661 gene product from transcript CG15661-RA	-0.616588	6.26235	-5.90152	4.79e-06	0.000732348	4.18385
242	157	0	CUST_22146_PI428323385	CG33653	Probe	49968	Caps	Calcium activated protein for secretion	-0.980004	5.87387	-5.89744	4.84e-06	0.000735696	4.17416
315	82	0	CUST_38227_PI428323385	CG8249	Probe	36742	CG8249	CG8249 gene product from transcript CG8249-RC	0.688441	7.97476	5.89668	4.85e-06	0.000735696	4.17236
9	100	0	CUST_6848_PI428323385	CG1349	Probe	43652	dj-1beta	CG1349 gene product from transcript CG1349-RA	0.509944	12.7564	5.8788	5.06e-06	0.000765646	4.12993
168	114	0	CUST_22148_PI428323385	CG33653	Probe	49968	Caps	Calcium activated protein for secretion	-1.00905	5.93525	-5.87194	5.15e-06	0.000775777	4.11362
57	77	0	CUST_23815_PI428323385	CG3448	Probe	39094	CG3448	CG3448 gene product from transcript CG3448-RB	-0.661624	9.3456	-5.86472	5.24e-06	0.00078672	4.09648
349	47	0	CUST_34527_PI428323385	CG6656	Probe	42576	CG6656	CG6656 gene product from transcript CG6656-RA	0.531579	9.32375	5.85613	5.35e-06	0.000800511	4.07606
334	74	0	CUST_22150_PI428323385	CG33653	Probe	49968	Caps	Calcium activated protein for secretion	-1.01279	5.89724	-5.84992	5.43e-06	0.000807433	4.06129
57	149	0	CUST_24590_PI428323385	CG3848	Probe	31149	trr	trithorax-related	0.655305	7.50931	5.8485	5.45e-06	0.000807433	4.05791
19	156	0	CUST_675_PI428323385	CG10287	Probe	40745	Gasp	CG10287 gene product from transcript CG10287-RB	0.769706	10.8108	5.8482	5.46e-06	0.000807433	4.0572
103	95	0	CUST_8696_PI428323385	CG14502	Probe	37092	CG14502	CG14502 gene product from transcript CG14502-RC	-0.804625	5.08338	-5.84682	5.47e-06	0.000807433	4.05392
287	70	0	CUST_23874_PI428323385	CG3492	Probe	37902	CG3492	CG3492 gene product from transcript CG3492-RA	1.04483	5.63945	5.84086	5.55e-06	0.000816401	4.03974
313	62	0	CUST_33874_PI428323385	CG6339	Probe	37564	rad50	CG6339 gene product from transcript CG6339-RE	-0.55291	11.6336	-5.83768	5.6e-06	0.000819899	4.03218
23	148	0	CUST_34523_PI428323385	CG6654	Probe	41831	CG6654	CG6654 gene product from transcript CG6654-RA	-0.63733	8.00749	-5.82654	5.75e-06	0.000839569	4.00567
148	3	0	CUST_28248_PI428323385	CG43161	Probe	3772559	Skeletor	CG43161 gene product from transcript CG43161-RD	0.712171	9.64829	5.82439	5.78e-06	0.000839873	4.00056
226	109	0	CUST_20847_PI428323385	CG32809	Probe	31121	CG32809	CG32809 gene product from transcript CG32809-RG	-0.535078	7.03433	-5.82356	5.79e-06	0.000839873	3.99859
7	125	0	CUST_38251_PI428323385	CG8262	Probe	35878	ana2	anastral spindle 2	0.525355	10.882	5.81557	5.91e-06	0.000853482	3.97956
320	92	0	CUST_22684_PI428323385	CG34057	Probe	3885645	CG34057	CG34057 gene product from transcript CG34057-RA	-0.618523	5.72527	-5.81309	5.94e-06	0.000855738	3.97365
135	12	0	CUST_4642_PI428323385	CG12163	Probe	40628	CG12163	CG12163 gene product from transcript CG12163-RB	0.582421	8.4001	5.80919	6e-06	0.000859962	3.96437
206	42	0	CUST_28027_PI428323385	CG43079	Probe	40515	nrm	neuromusculin	1.04039	6.21723	5.80829	6.01e-06	0.000859962	3.96221
215	138	0	CUST_16854_PI428323385	CG3033	Probe	31517	CG3033	CG3033 gene product from transcript CG3033-RA	0.550677	12.0172	5.8042	6.07e-06	0.000864953	3.95247
18	37	0	CUST_18938_PI428323385	CG31875	Probe	318996	CG31875	CG31875 gene product from transcript CG31875-RD	-0.750745	7.25843	-5.80315	6.09e-06	0.000864953	3.94998
255	1	0	CUST_4049_PI428323385	CG11897	Probe	43450	CG11897	CG11897 gene product from transcript CG11897-RA	-0.797617	7.80183	-5.79806	6.17e-06	0.000872828	3.93786
159	12	0	CUST_12607_PI428323385	CG17470	Probe	35321	CG17470	CG17470 gene product from transcript CG17470-RA	0.834976	5.50758	5.78758	6.33e-06	0.00089247	3.91288
288	106	0	CUST_131_PI428323385	CG1007	Probe	38091	emc	extra macrochaetae	-0.509088	11.7028	-5.78418	6.38e-06	0.000896921	3.90477
323	47	0	CUST_6478_PI428323385	CG13284	Probe	35021	CG13284	CG13284 gene product from transcript CG13284-RA	0.609666	7.89948	5.7798	6.45e-06	0.000903568	3.89432
383	25	0	CUST_30713_PI428323385	CG4880	Probe	32680	CG4880	CG4880 gene product from transcript CG4880-RA	0.719458	10.1741	5.77805	6.47e-06	0.000904418	3.89017
355	27	0	CUST_28028_PI428323385	CG43079	Probe	40515	nrm	neuromusculin	1.13489	6.30907	5.7593	6.78e-06	0.000943731	3.84544
249	60	0	CUST_18449_PI428323385	CG31641	Probe	33863	stai	stathmin	-0.651271	5.48734	-5.75595	6.83e-06	0.000946348	3.83745
45	115	0	CUST_5510_PI428323385	CG12703	Probe	32992	CG12703	CG12703 gene product from transcript CG12703-RA	0.410025	9.93145	5.75548	6.84e-06	0.000946348	3.83632
131	111	0	CUST_33296_PI428323385	CG6098	Probe	34449	Lrr47	Leucine-rich repeat 47	0.431495	10.2445	5.7492	6.95e-06	0.000957867	3.82133
248	67	0	CUST_28983_PI428323385	CG4364	Probe	34287	CG4364	CG4364 gene product from transcript CG4364-RA	-0.393	13.2132	-5.7411	7.09e-06	0.000973865	3.80199
27	63	0	CUST_15703_PI428323385	CG2488	Probe	35322	phr6-4	(6-4)-photolyase	0.760349	7.13277	5.73712	7.16e-06	0.000980199	3.79249
194	10	0	CUST_39099_PI428323385	CG8620	Probe	50310	CG8620	CG8620 gene product from transcript CG8620-RA	-0.918937	5.24726	-5.73442	7.2e-06	0.000983515	3.78603
322	118	0	CUST_774_PI428323385	CG10339	Probe	37854	CG10339	CG10339 gene product from transcript CG10339-RA	-0.673933	5.65755	-5.72148	7.44e-06	0.0010119	3.75513
41	12	0	CUST_12905_PI428323385	CG17681	Probe	35086	CG17681	CG17681 gene product from transcript CG17681-RA	0.86348	4.77283	5.71777	7.5e-06	0.00101786	3.74626
199	127	0	CUST_22582_PI428323385	CG33991	Probe	39572	nuf	nuclear fallout	-0.523495	6.73834	-5.70584	7.73e-06	0.00104469	3.71775
113	19	0	CUST_37091_PI428323385	CG7787	Probe	34142	CG7787	CG7787 gene product from transcript CG7787-RA	-0.859176	8.04378	-5.703	7.78e-06	0.0010474	3.71095
227	143	0	CUST_17150_PI428323385	CG3048	Probe	33638	Traf4	TNF-receptor-associated factor 4	-0.39646	9.01139	-5.70218	7.8e-06	0.0010474	3.70899
8	81	0	CUST_6845_PI428323385	CG13488	Probe	37496	CG13488	CG13488 gene product from transcript CG13488-RB	-0.799737	4.95817	-5.69492	7.94e-06	0.00106281	3.69164
317	26	0	CUST_25531_PI428323385	CG4174	Probe	40023	CG4174	CG4174 gene product from transcript CG4174-RB	-0.867827	4.99938	-5.6831	8.17e-06	0.00109062	3.66336
304	33	0	CUST_28018_PI428323385	CG43079	Probe	40515	nrm	neuromusculin	1.00228	6.13861	5.67835	8.27e-06	0.00109994	3.65197
185	14	0	CUST_21559_PI428323385	CG3326	Probe	33544	CG3326	CG3326 gene product from transcript CG3326-RA	0.709818	8.94396	5.67583	8.32e-06	0.00110269	3.64596
371	87	0	CUST_12608_PI428323385	CG17470	Probe	35321	CG17470	CG17470 gene product from transcript CG17470-RA	0.812457	5.67565	5.67476	8.34e-06	0.00110269	3.6434
238	154	0	CUST_5809_PI428323385	CG12896	Probe	36101	CG12896	CG12896 gene product from transcript CG12896-RA	0.859413	9.19589	5.66068	8.63e-06	0.00113791	3.60969
145	115	0	CUST_13568_PI428323385	CG17975	Probe	44269	sut2	sugar transporter 2	-0.710409	5.08666	-5.65717	8.71e-06	0.00114419	3.60127
302	73	0	CUST_17319_PI428323385	CG31006	Probe	43683	stops	slow termination of phototransduction	-0.606967	5.85423	-5.6447	8.98e-06	0.0011761	3.57141
108	91	0	CUST_23574_PI428323385	CG34405	Probe	37981	NaCP60E	Na channel protein 60E	-0.520952	7.17564	-5.64012	9.08e-06	0.00118574	3.56043
288	90	0	CUST_9984_PI428323385	CG1516	Probe	36020	CG1516	CG1516 gene product from transcript CG1516-RP	0.596238	10.3423	5.63456	9.2e-06	0.00119835	3.54709
202	122	0	CUST_4641_PI428323385	CG12163	Probe	40628	CG12163	CG12163 gene product from transcript CG12163-RB	0.546979	8.34673	5.62818	9.35e-06	0.0012123	3.53181
46	3	0	CUST_34525_PI428323385	CG6656	Probe	42576	CG6656	CG6656 gene product from transcript CG6656-RA	0.616945	9.10503	5.62734	9.37e-06	0.0012123	3.5298
336	105	0	CUST_24156_PI428323385	CG3630	Probe	31189	CG3630	CG3630 gene product from transcript CG3630-RA	-0.522244	8.10337	-5.61622	9.63e-06	0.00124211	3.50312
226	164	0	CUST_205_PI428323385	CG10091	Probe	41502	GstD9	Glutathione S transferase D9	0.74068	11.6004	5.60952	9.79e-06	0.0012589	3.48704
143	69	0	CUST_12700_PI428323385	CG17533	Probe	37113	GstE8	Glutathione S transferase E8	-1.52187	8.80729	-5.60253	9.96e-06	0.00127683	3.47028
195	153	0	CUST_12435_PI428323385	CG17332	Probe	34997	VhaSFD	Vacuolar H[+]-ATPase SFD subunit	0.563068	10.4639	5.5923	1.02e-05	0.00130541	3.44574
332	3	0	CUST_838_PI428323385	CG10363	Probe	35248	TepIV	Thiolester containing protein IV	0.595725	12.1256	5.57357	1.07e-05	0.00136289	3.40076
97	134	0	CUST_15989_PI428323385	CG2788	Probe	44058	Dot	Dorothy	-0.47093	7.994	-5.5667	1.09e-05	0.00138198	3.38425
307	136	0	CUST_836_PI428323385	CG10363	Probe	35248	TepIV	Thiolester containing protein IV	0.566369	12.1487	5.56091	1.1e-05	0.00139011	3.37034
20	66	0	CUST_33628_PI428323385	CG6214	Probe	34686	MRP	Multidrug-Resistance like Protein 1	-0.476902	9.91078	-5.56083	1.1e-05	0.00139011	3.37014
32	116	0	CUST_30646_PI428323385	CG4849	Probe	43358	CG4849	CG4849 gene product from transcript CG4849-RA	0.377699	12.0442	5.56067	1.1e-05	0.00139011	3.36975
105	32	0	CUST_833_PI428323385	CG10363	Probe	35248	TepIV	Thiolester containing protein IV	0.574859	12.2493	5.54947	1.13e-05	0.00142173	3.34284
210	159	0	CUST_36218_PI428323385	CG7367	Probe	34094	CG7367	CG7367 gene product from transcript CG7367-RB	0.960024	9.88957	5.54913	1.14e-05	0.00142173	3.34202
79	68	0	CUST_36331_PI428323385	CG7421	Probe	40433	Nopp140	CG7421 gene product from transcript CG7421-RB	0.416128	8.38823	5.52365	1.21e-05	0.00150946	3.28074
132	33	0	CUST_676_PI428323385	CG10287	Probe	40745	Gasp	CG10287 gene product from transcript CG10287-RB	0.777286	11.4725	5.51292	1.24e-05	0.00154536	3.25493
40	136	0	CUST_4314_PI428323385	CG12028	Probe	45282	dib	disembodied	0.759352	5.59305	5.51116	1.25e-05	0.00154753	3.25069
103	159	0	CUST_21030_PI428323385	CG33048	Probe	39238	Mocs1	Molybdenum cofactor synthesis 1 ortholog	-0.70164	6.80562	-5.50247	1.27e-05	0.00157645	3.22977
52	36	0	CUST_31_PI428323385	CG10021	Probe	33602	bowl	brother of odd with entrails limited	-0.7341	9.44269	-5.49233	1.31e-05	0.00161167	3.20537
381	54	0	CUST_30622_PI428323385	CG4839	Probe	34348	CG4839	CG4839 gene product from transcript CG4839-RB	0.799355	5.46646	5.47766	1.35e-05	0.00166629	3.17002
288	48	0	CUST_727_PI428323385	CG10311	Probe	41984	CG10311	CG10311 gene product from transcript CG10311-RA	0.647606	7.87717	5.46649	1.39e-05	0.00170797	3.1431
27	22	0	CUST_11277_PI428323385	CG16705	Probe	42791	SPE	Spatzle-Processing Enzyme	0.718265	7.10157	5.46322	1.4e-05	0.00171436	3.13524
161	3	0	CUST_4798_PI428323385	CG12241	Probe	41834	CG12241	CG12241 gene product from transcript CG12241-RA	0.598329	6.77545	5.46158	1.41e-05	0.00171436	3.13127
264	73	0	CUST_12581_PI428323385	CG1745	Probe	32090	HP5	Heterochromatin protein 5	0.745553	9.22502	5.46146	1.41e-05	0.00171436	3.13099
170	143	0	CUST_4344_PI428323385	CG12047	Probe	44839	mud	mushroom body defect	0.503012	6.08943	5.44429	1.47e-05	0.00178052	3.08959
61	87	0	CUST_343_PI428323385	CG10151	Probe	36639	CG10151	CG10151 gene product from transcript CG10151-RA	-0.477525	7.57178	-5.44382	1.47e-05	0.00178052	3.08846
204	152	0	CUST_2150_PI428323385	CG10932	Probe	31695	CG10932	CG10932 gene product from transcript CG10932-RA	0.835753	12.1408	5.4379	1.49e-05	0.00180165	3.07417
79	87	0	CUST_20025_PI428323385	CG32448	Probe	318032	CG32448	CG32448 gene product from transcript CG32448-RC	0.587967	10.283	5.43507	1.51e-05	0.00180914	3.06735
248	100	0	CUST_6147_PI428323385	CG13083	Probe	35230	CG13083	CG13083 gene product from transcript CG13083-RB	1.13402	4.93101	5.41523	1.58e-05	0.0018948	3.01947
34	80	0	CUST_18403_PI428323385	CG31628	Probe	33986	ade3	adenosine 3	0.536968	12.19	5.41074	1.6e-05	0.00191054	3.00864
18	101	0	CUST_17149_PI428323385	CG3048	Probe	33638	Traf4	TNF-receptor-associated factor 4	-0.373755	9.41645	-5.40863	1.61e-05	0.00191511	3.00355
280	92	0	CUST_1267_PI428323385	CG1058	Probe	40580	rpk	ripped pocket	-0.888469	8.20135	-5.40319	1.63e-05	0.00193284	2.99041
347	39	0	CUST_907_PI428323385	CG10392	Probe	35486	sxc	super sex combs	0.591205	11.7792	5.40264	1.63e-05	0.00193284	2.98907
356	116	0	CUST_22720_PI428323385	CG3409	Probe	35578	CG3409	CG3409 gene product from transcript CG3409-RB	-0.631143	8.04743	-5.39753	1.65e-05	0.00195195	2.97675
342	16	0	CUST_34440_PI428323385	CG6610	Probe	38693	CG6610	CG6610 gene product from transcript CG6610-RA	0.77969	12.0205	5.39087	1.68e-05	0.00197892	2.96064
57	48	0	CUST_16368_PI428323385	CG30016	Probe	246393	CG30016	CG30016 gene product from transcript CG30016-RA	0.738646	7.7472	5.3834	1.71e-05	0.00201024	2.94262
75	6	0	CUST_2860_PI428323385	CG11263	Probe	39472	CG11263	CG11263 gene product from transcript CG11263-RA	0.837592	6.04661	5.37849	1.73e-05	0.00202921	2.93075
170	45	0	CUST_24876_PI428323385	CG3980	Probe	33610	Cep97	CG3980 gene product from transcript CG3980-RC	-0.409183	9.70835	-5.37492	1.75e-05	0.00203675	2.92213
282	131	0	CUST_12747_PI428323385	CG17574	Probe	36415	CG17574	CG17574 gene product from transcript CG17574-RA	-0.704546	7.30865	-5.37377	1.75e-05	0.00203675	2.91935
126	131	0	CUST_33626_PI428323385	CG6214	Probe	34686	MRP	Multidrug-Resistance like Protein 1	-0.481488	9.94849	-5.37364	1.75e-05	0.00203675	2.91904
3	6	0	CUST_22142_PI428323385	CG33653	Probe	49968	Caps	Calcium activated protein for secretion	-0.781408	6.0071	-5.36891	1.77e-05	0.00205422	2.90759
365	106	0	CUST_6653_PI428323385	CG13380	Probe	40029	CG13380	CG13380 gene product from transcript CG13380-RB	-0.922614	5.39407	-5.36783	1.78e-05	0.00205422	2.905
209	45	0	CUST_34378_PI428323385	CG6584	Probe	41309	SelR	CG6584 gene product from transcript CG6584-RI	0.47869	8.76687	5.36688	1.78e-05	0.00205422	2.90269
105	115	0	CUST_206_PI428323385	CG10091	Probe	41502	GstD9	Glutathione S transferase D9	0.665328	10.8458	5.36253	1.8e-05	0.00207083	2.89218
237	126	0	CUST_6106_PI428323385	CG13062	Probe	39799	CG13062	CG13062 gene product from transcript CG13062-RB	-0.604439	5.68957	-5.35702	1.83e-05	0.0020936	2.87887
205	58	0	CUST_2649_PI428323385	CG11155	Probe	43822	CG11155	CG11155 gene product from transcript CG11155-RA	-0.708998	6.3459	-5.35262	1.85e-05	0.00211086	2.86822
257	117	0	CUST_40384_PI428323385	CG9212	Probe	32573	Nipsnap	CG9212 gene product from transcript CG9212-RC	0.740915	7.15787	5.34918	1.86e-05	0.0021232	2.8599
70	153	0	CUST_2427_PI428323385	CG11061	Probe	37524	GM130	CG11061 gene product from transcript CG11061-RB	0.448025	10.8011	5.34765	1.87e-05	0.00212385	2.8562
40	129	0	CUST_2149_PI428323385	CG10932	Probe	31695	CG10932	CG10932 gene product from transcript CG10932-RA	0.79887	12.1951	5.34688	1.87e-05	0.00212385	2.85435
290	61	0	CUST_14940_PI428323385	CG1966	Probe	43751	Acf1	ATP-dependent chromatin assembly factor large subunit	0.747875	11.2226	5.34418	1.89e-05	0.00213239	2.84782
358	100	0	CUST_39191_PI428323385	CG8663	Probe	35408	nrv3	nervana 3	-1.25816	4.98534	-5.34237	1.89e-05	0.00213273	2.84344
188	144	0	CUST_1426_PI428323385	CG10638	Probe	39424	CG10638	CG10638 gene product from transcript CG10638-RA	-0.689241	8.09832	-5.34196	1.9e-05	0.00213273	2.84245
206	50	0	CUST_16563_PI428323385	CG30104	Probe	246458	CG30104	CG30104 gene product from transcript CG30104-RB	1.54273	5.70551	5.33492	1.93e-05	0.00216455	2.82542
143	12	0	CUST_37899_PI428323385	CG8120	Probe	41108	HP1e	CG8120 gene product from transcript CG8120-RA	0.844038	5.1171	5.33265	1.94e-05	0.00216701	2.81993
348	134	0	CUST_21916_PI428323385	CG33521	Probe	3346141	CG33521	CG33521 gene product from transcript CG33521-RF	-0.670731	5.00306	-5.33233	1.94e-05	0.00216701	2.81914
94	131	0	CUST_15968_PI428323385	CG2759	Probe	31271	w	white	-0.82649	9.21919	-5.32732	1.97e-05	0.00218833	2.80702
281	135	0	CUST_27320_PI428323385	CG42694	Probe	10178792	CG42694	CG42694 gene product from transcript CG42694-RA	0.694284	5.56762	5.32339	1.99e-05	0.00220396	2.79752
62	154	0	CUST_33285_PI428323385	CG6094	Probe	34446	CG6094	CG6094 gene product from transcript CG6094-RA	0.580882	11.2884	5.31647	2.02e-05	0.00223625	2.78078
47	98	0	CUST_831_PI428323385	CG10363	Probe	35248	TepIV	Thiolester containing protein IV	0.544573	12.4528	5.31005	2.05e-05	0.00226627	2.76523
167	125	0	CUST_37755_PI428323385	CG8083	Probe	35914	CG8083	CG8083 gene product from transcript CG8083-RA	0.641266	5.51744	5.3069	2.07e-05	0.0022781	2.75761
297	21	0	CUST_6446_PI428323385	CG13258	Probe	34959	CG13258	CG13258 gene product from transcript CG13258-RA	-0.844483	7.06782	-5.30085	2.1e-05	0.00230657	2.74296
78	114	0	CUST_1640_PI428323385	CG10704	Probe	39418	toe	twin of eyg	-0.39316	11.5309	-5.2993	2.11e-05	0.00230946	2.73921
183	36	0	CUST_34261_PI428323385	CG6530	Probe	36961	mthl3	methuselah-like 3	-0.638497	11.171	-5.29466	2.13e-05	0.00233014	2.72799
220	42	0	CUST_6087_PI428323385	CG13053	Probe	50274	CG13053	CG13053 gene product from transcript CG13053-RA	1.07449	10.0006	5.28142	2.2e-05	0.0024019	2.69591
84	14	0	CUST_36180_PI428323385	CG7354	Probe	40001	mRpS26	mitochondrial ribosomal protein S26	0.966305	10.312	5.27634	2.23e-05	0.0024247	2.68362
242	150	0	CUST_15355_PI428323385	CG2162	Probe	38360	CG2162	CG2162 gene product from transcript CG2162-RA	0.665709	9.06891	5.27464	2.24e-05	0.0024247	2.6795
368	128	0	CUST_22143_PI428323385	CG33653	Probe	49968	Caps	Calcium activated protein for secretion	-1.04268	6.44827	-5.27451	2.24e-05	0.0024247	2.67918
113	8	0	CUST_15040_PI428323385	CG2004	Probe	31809	CG2004	CG2004 gene product from transcript CG2004-RA	0.722979	10.7984	5.26834	2.28e-05	0.00245591	2.66422
335	15	0	CUST_8669_PI428323385	CG14485	Probe	37010	swi2	CG14485 gene product from transcript CG14485-RA	1.04698	7.03288	5.26219	2.31e-05	0.00248735	2.64933
147	136	0	CUST_23572_PI428323385	CG34405	Probe	37981	NaCP60E	Na channel protein 60E	-0.447907	7.174	-5.26083	2.32e-05	0.00248944	2.64603
175	119	0	CUST_23816_PI428323385	CG3448	Probe	39094	CG3448	CG3448 gene product from transcript CG3448-RB	-0.543501	7.13171	-5.25762	2.34e-05	0.00250302	2.63825
118	117	0	CUST_33286_PI428323385	CG6094	Probe	34446	CG6094	CG6094 gene product from transcript CG6094-RA	0.550107	11.2713	5.25658	2.34e-05	0.00250317	2.63572
214	53	0	CUST_17322_PI428323385	CG31006	Probe	43683	stops	slow termination of phototransduction	-0.700074	5.82315	-5.25533	2.35e-05	0.00250459	2.63271
233	1	0	CUST_460_PI428323385	CG10200	Probe	36648	CG10200	CG10200 gene product from transcript CG10200-RB	0.661078	12.2788	5.24809	2.39e-05	0.00254373	2.61514
11	62	0	CUST_37092_PI428323385	CG7787	Probe	34142	CG7787	CG7787 gene product from transcript CG7787-RA	-0.80036	8.15924	-5.24625	2.4e-05	0.00254896	2.61069
31	123	0	CUST_3974_PI428323385	CG11856	Probe	43041	Nup358	Nucleoporin 358	-0.488388	10.5539	-5.23815	2.45e-05	0.0025943	2.59106
169	141	0	CUST_8082_PI428323385	CG14183	Probe	40192	CG14183	CG14183 gene product from transcript CG14183-RA	-0.871848	6.49535	-5.23439	2.48e-05	0.0026107	2.58193
360	31	0	CUST_28347_PI428323385	CG4320	Probe	31543	raptor	CG4320 gene product from transcript CG4320-RA	0.569183	7.30581	5.23361	2.48e-05	0.0026107	2.58005
95	159	0	CUST_17902_PI428323385	CG31262	Probe	318649	CG31262	CG31262 gene product from transcript CG31262-RB	1.12124	5.0454	5.23261	2.49e-05	0.00261073	2.57761
131	137	0	CUST_21123_PI428323385	CG33105	Probe	318890	p24-2	p24-related-2	-0.808774	6.77925	-5.22342	2.55e-05	0.00266451	2.55532
213	49	0	CUST_20000_PI428323385	CG32441	Probe	40396	CG32441	CG32441 gene product from transcript CG32441-RD	0.530553	12.6892	5.22099	2.56e-05	0.002674	2.54944
20	19	0	CUST_16805_PI428323385	CG30291	Probe	246534	CG30291	CG30291 gene product from transcript CG30291-RA	0.740632	11.4683	5.21869	2.58e-05	0.00267996	2.54386
146	2	0	CUST_15204_PI428323385	CG2086	Probe	38218	drpr	draper	-0.521565	5.53378	-5.21811	2.58e-05	0.00267996	2.54246
346	133	0	CUST_6479_PI428323385	CG13284	Probe	35021	CG13284	CG13284 gene product from transcript CG13284-RA	0.555321	7.54926	5.20378	2.67e-05	0.00277054	2.50768
6	107	0	CUST_25827_PI428323385	CG42272	Probe	318020	CG42272	CG42272 gene product from transcript CG42272-RC	0.671053	10.0422	5.20215	2.68e-05	0.00277497	2.50373
100	61	0	CUST_31311_PI428323385	CG5149	Probe	34013	CG5149	CG5149 gene product from transcript CG5149-RA	-0.784816	9.8092	-5.20086	2.69e-05	0.00277712	2.50059
167	132	0	CUST_39097_PI428323385	CG8620	Probe	50310	CG8620	CG8620 gene product from transcript CG8620-RA	-0.852188	5.39723	-5.19875	2.71e-05	0.00278493	2.49548
158	37	0	CUST_11546_PI428323385	CG16857	Probe	33635	CG16857	CG16857 gene product from transcript CG16857-RA	-1.09034	7.05567	-5.19542	2.73e-05	0.00280125	2.48741
339	32	0	CUST_6729_PI428323385	CG1342	Probe	43642	Spn100A	Serpin 100A	1.44408	9.49309	5.19034	2.76e-05	0.00282696	2.47507
245	46	0	CUST_23578_PI428323385	CG34405	Probe	37981	NaCP60E	Na channel protein 60E	-0.46623	7.13501	-5.18981	2.77e-05	0.00282696	2.47378
6	37	0	CUST_15990_PI428323385	CG2788	Probe	44058	Dot	Dorothy	-0.468012	7.36065	-5.18575	2.8e-05	0.00284878	2.46394
257	129	0	CUST_9907_PI428323385	CG1512	Probe	35420	Cul-2	Cullin-2	-0.440526	11.7526	-5.18181	2.82e-05	0.00287	2.45436
27	121	0	CUST_26891_PI428323385	CG42598	Probe	8674042	CG42598	CG42598 gene product from transcript CG42598-RA	0.583928	7.61361	5.17802	2.85e-05	0.00289025	2.44516
92	50	0	CUST_32068_PI428323385	CG5519	Probe	37123	Prp19	CG5519 gene product from transcript CG5519-RA	0.36998	12.735	5.17427	2.88e-05	0.00289472	2.43606
100	27	0	CUST_14393_PI428323385	CG18522	Probe	41894	CG18522	CG18522 gene product from transcript CG18522-RA	-1.21144	6.47023	-5.17397	2.88e-05	0.00289472	2.43533
6	91	0	CUST_8804_PI428323385	CG14567	Probe	40420	CG14567	CG14567 gene product from transcript CG14567-RA	0.647254	8.71814	5.17394	2.88e-05	0.00289472	2.43526
142	158	0	CUST_25825_PI428323385	CG42272	Probe	318020	CG42272	CG42272 gene product from transcript CG42272-RC	0.591995	9.96121	5.17356	2.88e-05	0.00289472	2.43434
187	4	0	CUST_18649_PI428323385	CG31728	Probe	34731	CG31728	CG31728 gene product from transcript CG31728-RC	-0.69574	12.2854	-5.17157	2.9e-05	0.00290219	2.42951
297	116	0	CUST_28021_PI428323385	CG43079	Probe	40515	nrm	neuromusculin	0.915629	6.24381	5.1621	2.97e-05	0.00296447	2.40651
193	140	0	CUST_25034_PI428323385	CG40191	Probe	3354930	CG40191	CG40191 gene product from transcript CG40191-RC	-0.471546	10.5152	-5.15876	2.99e-05	0.00297031	2.39839
168	146	0	CUST_30712_PI428323385	CG4880	Probe	32680	CG4880	CG4880 gene product from transcript CG4880-RA	0.676723	9.11855	5.15864	2.99e-05	0.00297031	2.39812
298	34	0	CUST_9000_PI428323385	CG14670	Probe	40659	Hcs	Holocarboxylase synthetase	0.464844	8.56265	5.15847	2.99e-05	0.00297031	2.3977
304	103	0	CUST_5895_PI428323385	CG12947	Probe	41201	CG12947	CG12947 gene product from transcript CG12947-RB	-0.648513	6.60268	-5.1538	3.03e-05	0.00299803	2.38636
144	2	0	CUST_33610_PI428323385	CG6214	Probe	34686	MRP	Multidrug-Resistance like Protein 1	-0.448574	9.79935	-5.15089	3.05e-05	0.00300818	2.37929
127	87	0	CUST_5097_PI428323385	CG12405	Probe	246663	Prx2540-1	Peroxiredoxin 2540-1	0.823004	9.84821	5.15057	3.05e-05	0.00300818	2.3785
43	52	0	CUST_17901_PI428323385	CG31262	Probe	318649	CG31262	CG31262 gene product from transcript CG31262-RB	0.937006	5.06934	5.14958	3.06e-05	0.00300856	2.37611
327	74	0	CUST_12870_PI428323385	CG17657	Probe	33349	frtz	fritz	0.411795	9.78571	5.14413	3.1e-05	0.00304266	2.36286
261	148	0	CUST_36619_PI428323385	CG7546	Probe	38844	CG7546	CG7546 gene product from transcript CG7546-RD	-0.420035	10.0957	-5.13897	3.14e-05	0.00307492	2.35033
229	160	0	CUST_31490_PI428323385	CG5229	Probe	43928	chm	chameau	-0.460442	9.26672	-5.13114	3.2e-05	0.00312834	2.3313
29	85	0	CUST_1270_PI428323385	CG1058	Probe	40580	rpk	ripped pocket	-0.815939	8.36465	-5.1219	3.28e-05	0.00319388	2.30885
215	133	0	CUST_20860_PI428323385	CG32809	Probe	31121	CG32809	CG32809 gene product from transcript CG32809-RG	-0.475796	6.92419	-5.11941	3.3e-05	0.00319644	2.3028
138	45	0	CUST_28989_PI428323385	CG43647	Probe	NA	NA	NA	-0.574293	4.98083	-5.11903	3.3e-05	0.00319644	2.30188
231	46	0	CUST_39512_PI428323385	CG8808	Probe	35970	Pdk	Pyruvate dehydrogenase kinase	0.472212	11.2424	5.11881	3.3e-05	0.00319644	2.30135
250	45	0	CUST_364_PI428323385	CG10158	Probe	33971	CG10158	CG10158 gene product from transcript CG10158-RA	0.443468	8.75756	5.11458	3.34e-05	0.00322298	2.29106
139	144	0	CUST_1081_PI428323385	CG10497	Probe	37447	Sdc	Syndecan	-0.615995	11.5197	-5.10696	3.4e-05	0.00327739	2.27253
84	109	0	CUST_36782_PI428323385	CG7627	Probe	34148	CG7627	CG7627 gene product from transcript CG7627-RB	-0.536378	10.6245	-5.10507	3.42e-05	0.00328541	2.26793
320	133	0	CUST_15967_PI428323385	CG2759	Probe	31271	w	white	-0.722346	9.427	-5.10239	3.44e-05	0.00329995	2.26142
357	112	0	CUST_12925_PI428323385	CG17686	Probe	43981	DIP1	DISCO Interacting Protein 1	-0.701555	10.0089	-5.09353	3.52e-05	0.00336606	2.23989
213	153	0	CUST_33612_PI428323385	CG6214	Probe	34686	MRP	Multidrug-Resistance like Protein 1	-0.439408	9.90051	-5.09222	3.53e-05	0.00336944	2.2367
384	131	0	CUST_34275_PI428323385	CG6538	Probe	41290	TfIIFbeta	Transcription factor TFIIFbeta	-0.535498	10.3272	-5.08013	3.64e-05	0.00346495	2.20729
101	11	0	CUST_32_PI428323385	CG10021	Probe	33602	bowl	brother of odd with entrails limited	-0.69803	9.42957	-5.07758	3.66e-05	0.0034792	2.2011
55	125	0	CUST_1178_PI428323385	CG10539	Probe	38654	S6k	RPS6-p70-protein kinase	0.70147	9.38585	5.0598	3.83e-05	0.00362906	2.15784
41	68	0	CUST_29982_PI428323385	CG4558	Probe	31631	CG4558	CG4558 gene product from transcript CG4558-RA	0.503337	7.38109	5.05839	3.84e-05	0.00363373	2.15441
318	132	0	CUST_36514_PI428323385	CG7506	Probe	38857	CG7506	CG7506 gene product from transcript CG7506-RA	0.712829	10.6377	5.05661	3.86e-05	0.00364175	2.15008
257	46	0	CUST_17387_PI428323385	CG31033	Probe	326115	CG31033	CG31033 gene product from transcript CG31033-RC	-0.32716	8.28085	-5.05209	3.9e-05	0.00366746	2.13909
111	114	0	CUST_16564_PI428323385	CG30104	Probe	246458	CG30104	CG30104 gene product from transcript CG30104-RB	1.25901	5.32651	5.05172	3.91e-05	0.00366746	2.13817
209	120	0	CUST_39100_PI428323385	CG8620	Probe	50310	CG8620	CG8620 gene product from transcript CG8620-RA	-1.01315	5.31981	-5.04955	3.93e-05	0.00366746	2.1329
7	65	0	CUST_19592_PI428323385	CG32195	Probe	317907	CG32195	CG32195 gene product from transcript CG32195-RA	0.532883	7.04081	5.04954	3.93e-05	0.00366746	2.13287
169	123	0	CUST_33634_PI428323385	CG6214	Probe	34686	MRP	Multidrug-Resistance like Protein 1	-0.454205	9.86372	-5.04934	3.93e-05	0.00366746	2.1324
190	41	0	CUST_5656_PI428323385	CG12792	Probe	46662	l(2)09851	lethal (2) 09851	0.379069	11.6971	5.04056	4.02e-05	0.0037406	2.11102
122	12	0	CUST_25080_PI428323385	CG40300	Probe	3355150	2003-08-01	Argonaute 3	-0.824418	6.82851	-5.03081	4.12e-05	0.00382447	2.08729
37	146	0	CUST_34581_PI428323385	CG6677	Probe	42936	ash2	absent, small, or homeotic discs 2	0.462482	10.3102	5.02943	4.13e-05	0.003827	2.08393
247	73	0	CUST_17088_PI428323385	CG30457	Probe	36940	CG30457	CG30457 gene product from transcript CG30457-RA	-0.621383	6.17462	-5.02879	4.14e-05	0.003827	2.08237
144	133	0	CUST_19544_PI428323385	CG32172	Probe	43918	noe	CG32172 gene product from transcript CG32172-RC	-0.677818	10.6578	-5.02172	4.21e-05	0.00387537	2.06517
325	40	0	CUST_36623_PI428323385	CG7546	Probe	38844	CG7546	CG7546 gene product from transcript CG7546-RD	-0.393683	10.2745	-5.02116	4.22e-05	0.00387537	2.06379
239	105	0	CUST_4731_PI428323385	CG12210	Probe	36080	Syb	Synaptobrevin	-0.496598	8.32082	-5.02114	4.22e-05	0.00387537	2.06376
24	21	0	CUST_11075_PI428323385	CG15892	Probe	3772603	CG15892	CG15892 gene product from transcript CG15892-RB	-0.944115	5.10991	-5.01458	4.29e-05	0.00392805	2.04778
256	148	0	CUST_24478_PI428323385	CG3782	Probe	33715	mRpL28	mitochondrial ribosomal protein L28	0.560211	12.2175	5.01401	4.29e-05	0.00392805	2.04638
320	127	0	CUST_33640_PI428323385	CG6214	Probe	34686	MRP	Multidrug-Resistance like Protein 1	-0.437127	9.91482	-5.0101	4.33e-05	0.00395807	2.03687
368	71	0	CUST_20002_PI428323385	CG32441	Probe	40396	CG32441	CG32441 gene product from transcript CG32441-RD	0.632863	12.6657	5.00915	4.35e-05	0.00395893	2.03455
12	127	0	CUST_999_PI428323385	CG10460	Probe	37229	cer	crammer	-0.753096	11.4811	-5.0012	4.43e-05	0.00402974	2.01519
6	57	0	CUST_16367_PI428323385	CG30016	Probe	246393	CG30016	CG30016 gene product from transcript CG30016-RA	0.696607	7.79471	4.99582	4.49e-05	0.00407554	2.0021
176	119	0	CUST_16853_PI428323385	CG3033	Probe	31517	CG3033	CG3033 gene product from transcript CG3033-RA	0.506196	12.2684	4.99053	4.55e-05	0.00412096	1.98922
35	5	0	CUST_21560_PI428323385	CG3326	Probe	33544	CG3326	CG3326 gene product from transcript CG3326-RA	0.649182	7.9346	4.98849	4.58e-05	0.00413316	1.98426
357	65	0	CUST_3921_PI428323385	CG11825	Probe	36099	CG11825	CG11825 gene product from transcript CG11825-RB	0.853249	5.891	4.9851	4.61e-05	0.00415953	1.97599
49	76	0	CUST_38682_PI428323385	CG8444	Probe	41104	VhaM8.9	CG8444 gene product from transcript CG8444-RA	0.440574	12.5756	4.98251	4.64e-05	0.00417761	1.96969
46	39	0	CUST_9728_PI428323385	CG15046	Probe	32833	CG15046	CG15046 gene product from transcript CG15046-RA	0.557327	6.59295	4.97974	4.68e-05	0.00419769	1.96295
80	91	0	CUST_7170_PI428323385	CG13679	Probe	38919	CG13679	CG13679 gene product from transcript CG13679-RA	-1.07716	6.59297	-4.97745	4.7e-05	0.00420442	1.95736
339	135	0	CUST_8670_PI428323385	CG14485	Probe	37010	swi2	CG14485 gene product from transcript CG14485-RA	0.97212	6.44453	4.97741	4.7e-05	0.00420442	1.95726
85	140	0	CUST_33816_PI428323385	CG6311	Probe	39957	Edc3	Enhancer of decapping 3	-0.746998	10.3153	-4.97422	4.74e-05	0.00422911	1.9495
18	106	0	CUST_9981_PI428323385	CG1516	Probe	36020	CG1516	CG1516 gene product from transcript CG1516-RP	0.567167	10.3797	4.96921	4.8e-05	0.00427353	1.93728
186	151	0	CUST_11644_PI428323385	CG16928	Probe	34565	mre11	meiotic recombination 11	-0.509732	10.9251	-4.96297	4.88e-05	0.00432389	1.92209
157	50	0	CUST_20011_PI428323385	CG32444	Probe	40406	CG32444	CG32444 gene product from transcript CG32444-RA	1.12288	6.41775	4.96284	4.88e-05	0.00432389	1.92178
178	150	0	CUST_33620_PI428323385	CG6214	Probe	34686	MRP	Multidrug-Resistance like Protein 1	-0.462644	9.79357	-4.96102	4.9e-05	0.00433452	1.91735
245	8	0	CUST_36627_PI428323385	CG7546	Probe	38844	CG7546	CG7546 gene product from transcript CG7546-RD	-0.424802	10.13	-4.9589	4.93e-05	0.00434847	1.91218
315	69	0	CUST_30435_PI428323385	CG4757	Probe	41330	CG4757	CG4757 gene product from transcript CG4757-RA	-0.855653	4.61267	-4.95238	5.01e-05	0.00441086	1.89629
63	116	0	CUST_34447_PI428323385	CG6612	Probe	41318	Adk3	Adenylate kinase-3	0.385575	10.5245	4.95151	5.02e-05	0.00441131	1.89416
59	86	0	CUST_14405_PI428323385	CG18536	Probe	37093	CG18536	CG18536 gene product from transcript CG18536-RA	-0.455603	5.25753	-4.94451	5.11e-05	0.00447993	1.87712
54	52	0	CUST_17320_PI428323385	CG31006	Probe	43683	stops	slow termination of phototransduction	-0.611328	5.75495	-4.93992	5.17e-05	0.00452235	1.86593
235	10	0	CUST_33017_PI428323385	CG5953	Probe	34985	CG5953	CG5953 gene product from transcript CG5953-RA	-0.501903	4.96456	-4.93209	5.27e-05	0.00460236	1.84685
128	49	0	CUST_33624_PI428323385	CG6214	Probe	34686	MRP	Multidrug-Resistance like Protein 1	-0.443536	9.90181	-4.92859	5.32e-05	0.00463329	1.83832
188	16	0	CUST_34880_PI428323385	CG6794	Probe	35045	Dif	Dorsal-related immunity factor	-0.940023	6.8995	-4.92578	5.35e-05	0.00465645	1.83146
201	156	0	CUST_20626_PI428323385	CG32685	Probe	31942	CG32685	CG32685 gene product from transcript CG32685-RC	-0.442063	9.87291	-4.91968	5.44e-05	0.00471841	1.8166
52	91	0	CUST_36098_PI428323385	CG7314	Probe	39322	Bmcp	CG7314 gene product from transcript CG7314-RB	-0.681209	7.32223	-4.91806	5.46e-05	0.00472791	1.81264
208	114	0	CUST_4733_PI428323385	CG12210	Probe	36080	Syb	Synaptobrevin	-0.506419	8.27873	-4.91516	5.5e-05	0.00475263	1.80557
273	63	0	CUST_20845_PI428323385	CG32809	Probe	31121	CG32809	CG32809 gene product from transcript CG32809-RG	-0.521041	7.01212	-4.90632	5.62e-05	0.00484909	1.78403
310	72	0	CUST_835_PI428323385	CG10363	Probe	35248	TepIV	Thiolester containing protein IV	0.537364	12.4597	4.90131	5.69e-05	0.00490033	1.77182
208	140	0	CUST_33611_PI428323385	CG6214	Probe	34686	MRP	Multidrug-Resistance like Protein 1	-0.462248	10.5369	-4.90034	5.71e-05	0.00490224	1.76946
193	6	0	CUST_42084_PI428323385	CG9948	Probe	38757	CG9948	CG9948 gene product from transcript CG9948-RA	0.745792	10.0285	4.89861	5.73e-05	0.00491362	1.76522
11	148	0	CUST_30232_PI428323385	CG4670	Probe	36464	CG4670	CG4670 gene product from transcript CG4670-RA	0.450549	11.0906	4.89637	5.76e-05	0.00493122	1.75977
77	76	0	CUST_33622_PI428323385	CG6214	Probe	34686	MRP	Multidrug-Resistance like Protein 1	-0.487089	9.9125	-4.8942	5.79e-05	0.00494813	1.75447
35	18	0	CUST_13278_PI428323385	CG17803	Probe	42141	CG17803	CG17803 gene product from transcript CG17803-RA	-0.948001	6.16142	-4.89304	5.81e-05	0.00495241	1.75166
67	33	0	CUST_34579_PI428323385	CG6677	Probe	42936	ash2	absent, small, or homeotic discs 2	0.489836	10.3104	4.88721	5.9e-05	0.00499778	1.73743
298	94	0	CUST_33636_PI428323385	CG6214	Probe	34686	MRP	Multidrug-Resistance like Protein 1	-0.475111	9.96745	-4.88716	5.9e-05	0.00499778	1.73733
78	122	0	CUST_16049_PI428323385	CG2841	Probe	44529	ptr	proximal to raf	0.485836	5.36061	4.887	5.9e-05	0.00499778	1.73692
328	131	0	CUST_15354_PI428323385	CG2162	Probe	38360	CG2162	CG2162 gene product from transcript CG2162-RA	0.576303	8.78574	4.88306	5.96e-05	0.00503004	1.72731
73	63	0	CUST_14417_PI428323385	CG18542	Probe	41176	CG18542	CG18542 gene product from transcript CG18542-RA	-0.426592	10.1947	-4.88283	5.96e-05	0.00503004	1.72676
245	28	0	CUST_33616_PI428323385	CG6214	Probe	34686	MRP	Multidrug-Resistance like Protein 1	-0.469217	9.91133	-4.87875	6.02e-05	0.00507165	1.7168
263	78	0	CUST_4050_PI428323385	CG11897	Probe	43450	CG11897	CG11897 gene product from transcript CG11897-RA	-0.950916	7.94759	-4.87743	6.04e-05	0.00507834	1.71358
89	30	0	CUST_2221_PI428323385	CG10965	Probe	31764	Corp	Companion of reaper	-0.432385	5.84445	-4.87344	6.1e-05	0.00511921	1.70385
14	64	0	CUST_9908_PI428323385	CG1512	Probe	35420	Cul-2	Cullin-2	-0.438338	11.3119	-4.86251	6.27e-05	0.00525101	1.6772
226	102	0	CUST_19165_PI428323385	CG32019	Probe	43814	bt	bent	-1.1812	5.75668	-4.86021	6.31e-05	0.00526766	1.67159
188	15	0	CUST_38134_PI428323385	CG8213	Probe	35902	CG8213	CG8213 gene product from transcript CG8213-RB	0.434757	5.47748	4.85966	6.32e-05	0.00526766	1.67027
353	87	0	CUST_33618_PI428323385	CG6214	Probe	34686	MRP	Multidrug-Resistance like Protein 1	-0.443134	9.9397	-4.85859	6.34e-05	0.00527147	1.66765
123	131	0	CUST_32526_PI428323385	CG5727	Probe	34356	CG5727	CG5727 gene product from transcript CG5727-RA	0.499944	10.484	4.85621	6.37e-05	0.00529259	1.66184
100	95	0	CUST_377_PI428323385	CG10165	Probe	35242	CG10165	CG10165 gene product from transcript CG10165-RC	0.366322	8.8947	4.85476	6.4e-05	0.00530142	1.65831
225	126	0	CUST_15350_PI428323385	CG2161	Probe	40683	Rga	Regena	0.536744	12.4244	4.85224	6.44e-05	0.00531587	1.65216
102	15	0	CUST_26619_PI428323385	CG42514	Probe	8674108	CG42514	CG42514 gene product from transcript CG42514-RA	0.648214	11.5732	4.85211	6.44e-05	0.00531587	1.65185
163	26	0	CUST_20850_PI428323385	CG32809	Probe	31121	CG32809	CG32809 gene product from transcript CG32809-RG	-0.572078	6.91386	-4.84454	6.56e-05	0.00540256	1.63339
157	135	0	CUST_18595_PI428323385	CG31705	Probe	34577	CG31705	CG31705 gene product from transcript CG31705-RA	0.521473	10.6735	4.84411	6.57e-05	0.00540256	1.63232
287	68	0	CUST_6476_PI428323385	CG13284	Probe	35021	CG13284	CG13284 gene product from transcript CG13284-RA	0.606871	7.97788	4.83771	6.68e-05	0.00547802	1.61673
39	51	0	CUST_21031_PI428323385	CG33048	Probe	39238	Mocs1	Molybdenum cofactor synthesis 1 ortholog	-0.656989	8.87148	-4.83703	6.69e-05	0.00547802	1.61505
291	126	0	CUST_20862_PI428323385	CG32809	Probe	31121	CG32809	CG32809 gene product from transcript CG32809-RG	-0.464419	7.00841	-4.83141	6.78e-05	0.00554496	1.60136
109	107	0	CUST_30277_PI428323385	CG4686	Probe	42361	CG4686	CG4686 gene product from transcript CG4686-RA	-0.385641	12.0133	-4.82923	6.82e-05	0.00555343	1.59603
372	108	0	CUST_796_PI428323385	CG10344	Probe	37565	CG10344	CG10344 gene product from transcript CG10344-RA	0.829555	6.59707	4.82864	6.83e-05	0.00555343	1.5946
141	116	0	CUST_794_PI428323385	CG10344	Probe	37565	CG10344	CG10344 gene product from transcript CG10344-RA	0.866972	7.05473	4.82849	6.83e-05	0.00555343	1.59424
279	60	0	CUST_40233_PI428323385	CG9147	Probe	33855	CG9147	CG9147 gene product from transcript CG9147-RB	-0.49829	10.6415	-4.82061	6.97e-05	0.00565348	1.575
253	137	0	CUST_9062_PI428323385	CG14704	Probe	41379	PGRP-LB	Peptidoglycan recognition protein LB	-0.604289	5.05138	-4.80538	7.24e-05	0.00586241	1.53786
142	150	0	CUST_19930_PI428323385	CG32409	Probe	318016	CG32409	CG32409 gene product from transcript CG32409-RA	0.609928	10.385	4.80335	7.28e-05	0.00587817	1.5329
201	31	0	CUST_21826_PI428323385	CG33486	Probe	2768965	asparagine-synthetase	asparagine synthetase	0.800125	6.45873	4.80279	7.29e-05	0.00587817	1.53153
250	46	0	CUST_16559_PI428323385	CG30101	Probe	36950	CG30101	CG30101 gene product from transcript CG30101-RA	-0.745516	5.36883	-4.79251	7.48e-05	0.00602024	1.50646
93	53	0	CUST_20844_PI428323385	CG32809	Probe	31121	CG32809	CG32809 gene product from transcript CG32809-RG	-0.46503	6.99925	-4.78453	7.63e-05	0.00613033	1.48699
154	36	0	CUST_22576_PI428323385	CG33991	Probe	39572	nuf	nuclear fallout	-0.582191	6.71761	-4.78271	7.66e-05	0.0061467	1.48255
36	35	0	CUST_10429_PI428323385	CG15444	Probe	33659	ine	inebriated	-0.614445	5.52875	-4.77592	7.8e-05	0.00621012	1.46597
43	5	0	CUST_41260_PI428323385	CG9614	Probe	40104	pip	pipe	0.548868	6.52868	4.77579	7.8e-05	0.00621012	1.46566
44	75	0	CUST_19145_PI428323385	CG32016	Probe	43836	CG32016	CG32016 gene product from transcript CG32016-RB	-0.532995	11.3695	-4.77562	7.8e-05	0.00621012	1.46524
192	49	0	CUST_3925_PI428323385	CG11825	Probe	36099	CG11825	CG11825 gene product from transcript CG11825-RB	0.751987	7.20534	4.7756	7.8e-05	0.00621012	1.46521
114	141	0	CUST_2222_PI428323385	CG10965	Probe	31764	Corp	Companion of reaper	-0.419529	5.86332	-4.77326	7.85e-05	0.00623465	1.45948
374	76	0	CUST_24517_PI428323385	CG3810	Probe	31154	Edem1	CG3810 gene product from transcript CG3810-RC	0.656693	7.8444	4.77253	7.86e-05	0.00623465	1.45772
33	71	0	CUST_41603_PI428323385	CG9761	Probe	40588	Nep2	Neprilysin 2	0.355581	12.0777	4.76262	8.06e-05	0.00637978	1.43353
255	157	0	CUST_40301_PI428323385	CG9170	Probe	32563	CG9170	CG9170 gene product from transcript CG9170-RB	-0.521927	10.2016	-4.76185	8.08e-05	0.00638014	1.43165
142	139	0	CUST_33512_PI428323385	CG6175	Probe	39271	CG6175	CG6175 gene product from transcript CG6175-RB	-0.558725	7.68445	-4.7599	8.12e-05	0.00639952	1.42689
47	110	0	CUST_7143_PI428323385	CG13663	Probe	43029	CG13663	CG13663 gene product from transcript CG13663-RA	-0.457544	10.0392	-4.75841	8.15e-05	0.00641156	1.42325
39	140	0	CUST_39826_PI428323385	CG8956	Probe	42043	Ahcy89E	Adenosylhomocysteinase 89E	0.639527	6.08816	4.75399	8.24e-05	0.00647103	1.41246
248	23	0	CUST_28025_PI428323385	CG43079	Probe	40515	nrm	neuromusculin	0.507219	5.38374	4.75312	8.26e-05	0.00647316	1.41034
228	5	0	CUST_23110_PI428323385	CG34261	Probe	5740205	CG34261	CG34261 gene product from transcript CG34261-RB	0.360365	9.23691	4.74775	8.37e-05	0.00653817	1.39725
121	49	0	CUST_24155_PI428323385	CG3630	Probe	31189	CG3630	CG3630 gene product from transcript CG3630-RA	-0.458222	8.26676	-4.74766	8.37e-05	0.00653817	1.39702
92	120	0	CUST_2322_PI428323385	CG11009	Probe	39460	CG11009	CG11009 gene product from transcript CG11009-RB	0.567512	8.16978	4.74599	8.4e-05	0.0065536	1.39293
274	58	0	CUST_21029_PI428323385	CG33048	Probe	39238	Mocs1	Molybdenum cofactor synthesis 1 ortholog	-0.648564	6.70308	-4.74089	8.51e-05	0.00662254	1.3805
300	136	0	CUST_39823_PI428323385	CG8956	Probe	42043	Ahcy89E	Adenosylhomocysteinase 89E	0.846422	6.91629	4.74035	8.52e-05	0.00662254	1.37918
281	116	0	CUST_34213_PI428323385	CG6503	Probe	50079	CG6503	CG6503 gene product from transcript CG6503-RA	0.673384	4.51958	4.73792	8.58e-05	0.00665086	1.37325
187	116	0	CUST_14856_PI428323385	CG1915	Probe	44013	sls	sallimus	-0.664291	5.28858	-4.73542	8.63e-05	0.00668038	1.36716
99	118	0	CUST_27752_PI428323385	CG42827	Probe	42763	CG42827	CG42827 gene product from transcript CG42827-RC	0.56455	4.46971	4.73462	8.65e-05	0.00668164	1.3652
357	158	0	CUST_29997_PI428323385	CG4562	Probe	42362	CG4562	CG4562 gene product from transcript CG4562-RB	-0.799984	7.98326	-4.73324	8.68e-05	0.00668633	1.36184
384	15	0	CUST_14939_PI428323385	CG1966	Probe	43751	Acf1	ATP-dependent chromatin assembly factor large subunit	0.819082	11.1705	4.73288	8.69e-05	0.00668633	1.36096
136	115	0	CUST_16473_PI428323385	CG3008	Probe	33693	CG3008	CG3008 gene product from transcript CG3008-RA	-0.436599	10.3977	-4.71797	9.02e-05	0.00692899	1.32456
24	72	0	CUST_33614_PI428323385	CG6214	Probe	34686	MRP	Multidrug-Resistance like Protein 1	-0.447838	9.94949	-4.71685	9.04e-05	0.00693581	1.32184
302	19	0	CUST_22685_PI428323385	CG34057	Probe	3885645	CG34057	CG34057 gene product from transcript CG34057-RA	-0.655562	5.50422	-4.70568	9.3e-05	0.00712035	1.29456
290	65	0	CUST_10187_PI428323385	CG15284	Probe	34845	pburs	partner of burs	0.637228	6.07647	4.70292	9.36e-05	0.0071568	1.28784
247	139	0	CUST_4334_PI428323385	CG12047	Probe	44839	mud	mushroom body defect	-0.646181	7.29742	-4.70093	9.41e-05	0.00717967	1.28299
4	137	0	CUST_26779_PI428323385	CG42562	Probe	37008	CG42562	CG42562 gene product from transcript CG42562-RA	0.547141	6.84031	4.69707	9.5e-05	0.00723662	1.27356
334	122	0	CUST_6448_PI428323385	CG13258	Probe	34959	CG13258	CG13258 gene product from transcript CG13258-RA	-0.757811	7.57459	-4.69592	9.53e-05	0.0072445	1.27075
199	3	0	CUST_41088_PI428323385	CG9523	Probe	33897	l(2)k11101	lethal (2) k11101	0.457229	9.97633	4.69029	9.67e-05	0.00732563	1.25701
5	64	0	CUST_18596_PI428323385	CG31705	Probe	34577	CG31705	CG31705 gene product from transcript CG31705-RA	0.482651	10.7647	4.69005	9.67e-05	0.00732563	1.25644
100	53	0	CUST_31511_PI428323385	CG5247	Probe	117419	Irbp	Inverted repeat-binding protein	-0.429874	10.315	-4.68923	9.69e-05	0.00732766	1.25443
176	136	0	CUST_40489_PI428323385	CG9252	Probe	35380	del	deadlock	-0.652026	9.83269	-4.68838	9.71e-05	0.00733017	1.25236
234	71	0	CUST_677_PI428323385	CG10287	Probe	40745	Gasp	CG10287 gene product from transcript CG10287-RB	0.610989	7.95726	4.68602	9.77e-05	0.00735677	1.2466
321	159	0	CUST_36626_PI428323385	CG7546	Probe	38844	CG7546	CG7546 gene product from transcript CG7546-RD	-0.354548	10.0608	-4.68508	9.79e-05	0.00735677	1.24429
108	102	0	CUST_37313_PI428323385	CG7900	Probe	40957	CG7900	CG7900 gene product from transcript CG7900-RB	-0.560545	9.91826	-4.68439	9.81e-05	0.00735677	1.24261
48	13	0	CUST_6475_PI428323385	CG13284	Probe	35021	CG13284	CG13284 gene product from transcript CG13284-RA	0.528076	7.56673	4.6841	9.82e-05	0.00735677	1.24192
164	162	0	CUST_40487_PI428323385	CG9252	Probe	35380	del	deadlock	-0.595488	9.76805	-4.68275	9.85e-05	0.00736116	1.23863
12	102	0	CUST_132_PI428323385	CG1007	Probe	38091	emc	extra macrochaetae	-0.464128	11.7198	-4.68158	9.88e-05	0.00736116	1.23576
32	11	0	CUST_21124_PI428323385	CG33105	Probe	318890	p24-2	p24-related-2	-0.780731	6.63649	-4.6815	9.88e-05	0.00736116	1.23558
343	111	0	CUST_18404_PI428323385	CG31628	Probe	33986	ade3	adenosine 3	0.646403	10.7912	4.68088	9.9e-05	0.00736116	1.23405
260	46	0	CUST_17263_PI428323385	CG3083	Probe	33493	Prx6005	Peroxiredoxin 6005	0.459158	11.6658	4.68035	9.91e-05	0.00736116	1.23275
350	44	0	CUST_19357_PI428323385	CG32100	Probe	39400	CG32100	CG32100 gene product from transcript CG32100-RA	-0.506025	6.79992	-4.67443	0.000100596	0.00745826	1.21832
309	120	0	CUST_12748_PI428323385	CG17574	Probe	36415	CG17574	CG17574 gene product from transcript CG17574-RA	-0.75567	7.3415	-4.66431	0.000103189	0.00761682	1.19361
133	133	0	CUST_32443_PI428323385	CG5690	Probe	38258	CG5690	CG5690 gene product from transcript CG5690-RA	-0.465384	10.7744	-4.66428	0.000103195	0.00761682	1.19355
335	62	0	CUST_39563_PI428323385	CG8833	Probe	39535	CG8833	CG8833 gene product from transcript CG8833-RA	-0.773581	8.21674	-4.66397	0.000103277	0.00761682	1.19278
276	123	0	CUST_22578_PI428323385	CG33991	Probe	39572	nuf	nuclear fallout	-0.518199	6.76793	-4.66315	0.000103491	0.00761929	1.19077
140	160	0	CUST_773_PI428323385	CG10339	Probe	37854	CG10339	CG10339 gene product from transcript CG10339-RA	-0.542792	5.64495	-4.66187	0.000103822	0.00763037	1.18767
223	114	0	CUST_4343_PI428323385	CG12047	Probe	44839	mud	mushroom body defect	0.615613	6.42933	4.65606	0.00010535	0.00772923	1.17348
198	149	0	CUST_6774_PI428323385	CG13436	Probe	37334	CG13436	CG13436 gene product from transcript CG13436-RA	-0.578111	6.98066	-4.65383	0.000105943	0.00775925	1.16803
186	107	0	CUST_532_PI428323385	CG10236	Probe	38723	LanA	Laminin A	-0.511379	12.3636	-4.64957	0.000107084	0.00782919	1.15763
118	68	0	CUST_15398_PI428323385	CG2184	Probe	43587	Mlc2	Myosin light chain 2	-1.11855	10.771	-4.64845	0.000107384	0.00783459	1.15492
312	137	0	CUST_18528_PI428323385	CG31673	Probe	35348	CG31673	CG31673 gene product from transcript CG31673-RA	0.69438	10.7611	4.64791	0.000107529	0.00783459	1.1536
30	4	0	CUST_30231_PI428323385	CG4670	Probe	36464	CG4670	CG4670 gene product from transcript CG4670-RA	0.517933	10.9075	4.64515	0.000108278	0.00786561	1.14687
262	118	0	CUST_36157_PI428323385	CG7341	Probe	40004	CG7341	CG7341 gene product from transcript CG7341-RB	0.469582	8.98662	4.6447	0.000108402	0.00786561	1.14575
173	126	0	CUST_33609_PI428323385	CG6214	Probe	34686	MRP	Multidrug-Resistance like Protein 1	-0.449781	10.4808	-4.64429	0.000108514	0.00786561	1.14475
218	52	0	CUST_23460_PI428323385	CG34383	Probe	5740131	CG34383	CG34383 gene product from transcript CG34383-RE	-0.575621	8.85806	-4.64299	0.000108869	0.00787778	1.14158
42	36	0	CUST_41602_PI428323385	CG9761	Probe	40588	Nep2	Neprilysin 2	0.360985	11.9431	4.64177	0.000109202	0.00788837	1.13862
233	30	0	CUST_34439_PI428323385	CG6610	Probe	38693	CG6610	CG6610 gene product from transcript CG6610-RA	0.717613	12.0356	4.63805	0.000110228	0.00794562	1.12954
42	14	0	CUST_33052_PI428323385	CG5973	Probe	34023	CG5973	CG5973 gene product from transcript CG5973-RA	0.702803	8.08657	4.63754	0.000110372	0.00794562	1.12828
155	155	0	CUST_19120_PI428323385	CG3200	Probe	38075	Reg-2	Rhythmically expressed gene 2	0.992789	10.29	4.63355	0.000111483	0.00801193	1.11856
153	118	0	CUST_3976_PI428323385	CG11856	Probe	43041	Nup358	Nucleoporin 358	-0.441894	10.5071	-4.61287	0.000117432	0.00842517	1.06809
260	154	0	CUST_41135_PI428323385	CG9542	Probe	33907	CG9542	CG9542 gene product from transcript CG9542-RA	0.623731	6.89794	4.61158	0.000117812	0.00843809	1.06495
102	131	0	CUST_1071_PI428323385	CG10494	Probe	37453	CG10494	CG10494 gene product from transcript CG10494-RA	0.470299	8.44647	4.6097	0.000118373	0.00846388	1.06035
18	25	0	CUST_22141_PI428323385	CG33653	Probe	49968	Caps	Calcium activated protein for secretion	-0.987705	6.44238	-4.60832	0.000118784	0.00846904	1.05698
98	19	0	CUST_6847_PI428323385	CG1349	Probe	43652	dj-1beta	CG1349 gene product from transcript CG1349-RA	0.486324	12.7035	4.60811	0.000118847	0.00846904	1.05647
181	98	0	CUST_19858_PI428323385	CG32364	Probe	317996	CG32364	CG32364 gene product from transcript CG32364-RA	2.00279	8.75246	4.60652	0.000119321	0.0084752	1.05261
130	56	0	CUST_2650_PI428323385	CG11155	Probe	43822	CG11155	CG11155 gene product from transcript CG11155-RA	-0.696784	5.89231	-4.60648	0.000119335	0.0084752	1.05249
262	145	0	CUST_12611_PI428323385	CG17472	Probe	35320	CG17472	CG17472 gene product from transcript CG17472-RA	-0.628287	4.53791	-4.60161	0.000120805	0.0085652	1.04061
19	144	0	CUST_35330_PI428323385	CG6986	Probe	31408	Proc-R	Proctolin receptor	-0.473711	5.0092	-4.59866	0.000121703	0.00861434	1.03343
273	5	0	CUST_30714_PI428323385	CG4880	Probe	32680	CG4880	CG4880 gene product from transcript CG4880-RA	0.675474	9.0908	4.59799	0.00012191	0.00861456	1.03177
317	88	0	CUST_33885_PI428323385	CG6342	Probe	41269	Irp-1B	Iron regulatory protein 1B	0.380789	12.4963	4.59558	0.000122649	0.00865229	1.02591
140	159	0	CUST_25015_PI428323385	CG40160	Probe	3354965	CG40160	CG40160 gene product from transcript CG40160-RE	-0.37683	13.137	-4.59352	0.000123288	0.00868282	1.02087
245	128	0	CUST_18833_PI428323385	CG31808	Probe	10178782	CG31808	CG31808 gene product from transcript CG31808-RC	-0.397012	6.45163	-4.58727	0.000125241	0.00879143	1.00562
88	10	0	CUST_17076_PI428323385	CG30448	Probe	246667	Obp56i	Odorant-binding protein 56i	0.363264	5.11214	4.58725	0.000125247	0.00879143	1.00558
156	115	0	CUST_14606_PI428323385	CG18731	Probe	59246	CG18731	CG18731 gene product from transcript CG18731-RA	0.351339	12.0303	4.58487	0.000125996	0.00882938	0.999783
95	49	0	CUST_9155_PI428323385	CG14757	Probe	35797	CG14757	CG14757 gene product from transcript CG14757-RA	0.379953	6.96826	4.58404	0.00012626	0.00883317	0.997756
10	109	0	CUST_9727_PI428323385	CG15046	Probe	32833	CG15046	CG15046 gene product from transcript CG15046-RA	0.515805	6.75012	4.58225	0.000126829	0.00885832	0.99339
211	133	0	CUST_3926_PI428323385	CG11825	Probe	36099	CG11825	CG11825 gene product from transcript CG11825-RB	0.789656	7.0565	4.57682	0.000128574	0.00896531	0.980137
115	19	0	CUST_11183_PI428323385	CG1628	Probe	31990	CG1628	CG1628 gene product from transcript CG1628-RB	-0.557656	6.73969	-4.56535	0.000132337	0.00921247	0.952152
187	125	0	CUST_39972_PI428323385	CG9027	Probe	36232	CG9027	CG9027 gene product from transcript CG9027-RD	0.325752	12.9233	4.56258	0.000133262	0.0092616	0.945392
61	140	0	CUST_24434_PI428323385	CG3759	Probe	34258	CG3759	CG3759 gene product from transcript CG3759-RB	0.592144	5.16822	4.55981	0.000134194	0.00931103	0.938633
267	53	0	CUST_27330_PI428323385	CG42699	Probe	31507	CG42699	CG42699 gene product from transcript CG42699-RC	0.455725	6.66213	4.55798	0.000134813	0.00933865	0.934166
122	49	0	CUST_4662_PI428323385	CG12177	Probe	32326	CG12177	CG12177 gene product from transcript CG12177-RA	-0.718093	7.79899	-4.55592	0.000135513	0.0093717	0.929148
231	112	0	CUST_34414_PI428323385	CG6598	Probe	41311	Fdh	Formaldehyde dehydrogenase	0.420913	12.7537	4.55268	0.000136621	0.0094329	0.921245
9	22	0	CUST_41601_PI428323385	CG9761	Probe	40588	Nep2	Neprilysin 2	0.361502	12.0652	4.54521	0.000139211	0.00959599	0.903033
98	106	0	CUST_539_PI428323385	CG10238	Probe	43017	Mocs2	Molybdopterin synthase 2	0.375348	9.14415	4.54257	0.000140139	0.00964422	0.896587
67	87	0	CUST_33511_PI428323385	CG6175	Probe	39271	CG6175	CG6175 gene product from transcript CG6175-RB	-0.471576	7.6838	-4.53513	0.000142786	0.00979158	0.878442
181	143	0	CUST_40390_PI428323385	CG9214	Probe	32574	Tob	CG9214 gene product from transcript CG9214-RA	-1.16278	5.69995	-4.53495	0.000142852	0.00979158	0.877991
228	150	0	CUST_29981_PI428323385	CG4558	Probe	31631	CG4558	CG4558 gene product from transcript CG4558-RA	0.473607	7.18507	4.53451	0.000143008	0.00979158	0.87693
88	45	0	CUST_363_PI428323385	CG10158	Probe	33971	CG10158	CG10158 gene product from transcript CG10158-RA	0.455359	8.77543	4.53396	0.000143209	0.00979158	0.875573
13	164	0	CUST_18990_PI428323385	CG31918	Probe	326172	CG31918	CG31918 gene product from transcript CG31918-RA	0.668544	9.19613	4.53269	0.000143666	0.00980692	0.872485
59	67	0	CUST_24210_PI428323385	CG3653	Probe	31292	kirre	kin of irre	-0.368656	8.83472	-4.52567	0.000146226	0.00996493	0.855357
96	130	0	CUST_13699_PI428323385	CG18069	Probe	43828	CaMKII	Calcium/calmodulin-dependent protein kinase II	-0.473249	10.8425	-4.52505	0.000146453	0.00996493	0.853851
74	86	0	CUST_37355_PI428323385	CG7916	Probe	34800	CG7916	CG7916 gene product from transcript CG7916-RA	0.832988	5.2983	4.52294	0.000147231	0.0100017	0.848716
196	117	0	CUST_20134_PI428323385	CG32486	Probe	38367	CG32486	CG32486 gene product from transcript CG32486-RD	-0.438586	9.32164	-4.5218	0.000147655	0.0100022	0.845926
247	17	0	CUST_30484_PI428323385	CG4781	Probe	37943	CG4781	CG4781 gene product from transcript CG4781-RA	0.674845	4.28765	4.52165	0.000147711	0.0100022	0.845555
292	22	0	CUST_10349_PI428323385	CG15400	Probe	33476	CG15400	CG15400 gene product from transcript CG15400-RB	-0.839372	6.01605	-4.51969	0.00014844	0.0100354	0.840786
287	92	0	CUST_10544_PI428323385	CG15529	Probe	43584	CG15529	CG15529 gene product from transcript CG15529-RA	-0.664561	7.61164	-4.51629	0.000149715	0.0101054	0.832493
151	120	0	CUST_23581_PI428323385	CG34405	Probe	37981	NaCP60E	Na channel protein 60E	-0.537411	9.75803	-4.5138	0.000150657	0.0101527	0.826411
22	93	0	CUST_32892_PI428323385	CG5896	Probe	43273	grass	Gram-positive Specific Serine protease	0.556554	8.92594	4.51035	0.000151968	0.0102248	0.818005
218	111	0	CUST_33871_PI428323385	CG6339	Probe	37564	rad50	CG6339 gene product from transcript CG6339-RE	-0.475609	11.9191	-4.50086	0.00015564	0.0104551	0.794861
310	79	0	CUST_39192_PI428323385	CG8663	Probe	35408	nrv3	nervana 3	-0.546259	4.63509	-4.49965	0.000156114	0.0104703	0.791915
114	53	0	CUST_20843_PI428323385	CG32809	Probe	31121	CG32809	CG32809 gene product from transcript CG32809-RG	-0.470907	7.02493	-4.49843	0.000156591	0.010477	0.788953
258	156	0	CUST_21825_PI428323385	CG33486	Probe	2768965	asparagine-synthetase	asparagine synthetase	0.826675	7.24538	4.49813	0.000156711	0.010477	0.788216
93	7	0	CUST_3815_PI428323385	CG11765	Probe	36098	Prx2540-2	Peroxiredoxin 2540-2	0.935515	8.68028	4.49557	0.000157723	0.010528	0.781972
356	109	0	CUST_1268_PI428323385	CG1058	Probe	40580	rpk	ripped pocket	-0.906792	8.19354	-4.4928	0.000158828	0.010585	0.775208
286	9	0	CUST_21788_PI428323385	CG33475	Probe	2768724	CG33475	CG33475 gene product from transcript CG33475-RA	-0.451462	4.5318	-4.49034	0.000159813	0.0106339	0.769211
210	125	0	CUST_33341_PI428323385	CG6117	Probe	39733	Pka-C3	cAMP-dependent protein kinase 3	-0.419023	9.06108	-4.4862	0.000161485	0.0107282	0.759125
21	86	0	CUST_29606_PI428323385	CG43946	Probe	NA	NA	NA	0.375374	7.66239	4.47979	0.00016411	0.0108849	0.743493
164	147	0	CUST_9425_PI428323385	CG14907	Probe	42031	CG14907	CG14907 gene product from transcript CG14907-RB	-0.524231	8.36382	-4.47918	0.000164359	0.0108849	0.742023
102	45	0	CUST_17281_PI428323385	CG3095	Probe	31120	hfw	halfway	0.413416	10.0973	4.47773	0.000164962	0.0109077	0.738475
204	58	0	CUST_33815_PI428323385	CG6311	Probe	39957	Edc3	Enhancer of decapping 3	-0.86647	9.83154	-4.4761	0.00016564	0.0109354	0.7345
3	94	0	CUST_31108_PI428323385	CG5029	Probe	34396	SamDC	S-adenosylmethionine decarboxylase	-0.502109	8.87499	-4.47463	0.000166253	0.0109587	0.730923
36	58	0	CUST_2313_PI428323385	CG11009	Probe	39460	CG11009	CG11009 gene product from transcript CG11009-RB	0.544872	8.17406	4.46999	0.000168205	0.0110584	0.719606
377	54	0	CUST_38491_PI428323385	CG8366	Probe	36754	CG8366	CG8366 gene product from transcript CG8366-RA	0.445037	10.5114	4.46979	0.00016829	0.0110584	0.71912
216	51	0	CUST_3801_PI428323385	CG11759	Probe	32071	Kap3	Kinesin associated protein 3	0.607261	7.34572	4.46793	0.00016908	0.011093	0.714581
127	113	0	CUST_24153_PI428323385	CG3630	Probe	31189	CG3630	CG3630 gene product from transcript CG3630-RA	-0.411604	8.30818	-4.46613	0.000169844	0.0111258	0.710212
77	128	0	CUST_12015_PI428323385	CG17134	Probe	34494	CG17134	CG17134 gene product from transcript CG17134-RA	1.10447	4.96029	4.46273	0.000171303	0.0111752	0.701921
109	23	0	CUST_7169_PI428323385	CG13679	Probe	38919	CG13679	CG13679 gene product from transcript CG13679-RA	-1.07419	6.61802	-4.46236	0.000171463	0.0111752	0.70102
97	103	0	CUST_20348_PI428323385	CG32549	Probe	32822	CG32549	CG32549 gene product from transcript CG32549-RD	-0.568512	5.46571	-4.46209	0.000171579	0.0111752	0.70036
18	35	0	CUST_19591_PI428323385	CG32195	Probe	317907	CG32195	CG32195 gene product from transcript CG32195-RA	0.423858	7.72497	4.46191	0.000171657	0.0111752	0.699922
214	159	0	CUST_24121_PI428323385	CG3619	Probe	42313	Dl	Delta	-0.610019	11.2178	-4.46075	0.00017216	0.0111907	0.697086
11	100	0	CUST_36416_PI428323385	CG7447	Probe	38540	slow	slowdown	0.325535	10.0836	4.45469	0.000174804	0.0113451	0.682317
14	87	0	CUST_37839_PI428323385	CG8104	Probe	39169	nudE	CG8104 gene product from transcript CG8104-RB	-0.415267	9.28708	-4.45116	0.000176362	0.0114286	0.67372
278	1	0	CUST_12688_PI428323385	CG17527	Probe	37110	GstE5	Glutathione S transferase E5	0.784393	8.57564	4.44951	0.000177095	0.0114487	0.669703
303	42	0	CUST_1868_PI428323385	CG10805	Probe	33960	l(2)k09022	lethal (2) k09022	0.391854	10.5399	4.44886	0.000177383	0.0114487	0.668125
373	64	0	CUST_25286_PI428323385	CG4094	Probe	31605	l(1)G0255	lethal (1) G0255	0.549041	13.3742	4.44833	0.000177622	0.0114487	0.666822
20	83	0	CUST_7378_PI428323385	CG13800	Probe	38305	CG13800	CG13800 gene product from transcript CG13800-RB	0.433529	7.67283	4.44803	0.000177758	0.0114487	0.666082
173	13	0	CUST_33637_PI428323385	CG6214	Probe	34686	MRP	Multidrug-Resistance like Protein 1	-0.476792	10.5167	-4.44532	0.000178971	0.0115093	0.659491
69	101	0	CUST_6730_PI428323385	CG1342	Probe	43642	Spn100A	Serpin 100A	1.32188	9.48101	4.43944	0.000181637	0.0116509	0.645166
317	106	0	CUST_14844_PI428323385	CG1915	Probe	44013	sls	sallimus	-0.678197	5.26383	-4.43925	0.000181727	0.0116509	0.644689
377	52	0	CUST_36721_PI428323385	CG7590	Probe	39270	scyl	scylla	-1.21662	14.3961	-4.43831	0.000182155	0.0116607	0.642406
9	123	0	CUST_30124_PI428323385	CG4615	Probe	31656	CG4615	CG4615 gene product from transcript CG4615-RA	0.678769	7.94521	4.43578	0.000183318	0.0117173	0.636243
380	108	0	CUST_12918_PI428323385	CG17686	Probe	43981	DIP1	DISCO Interacting Protein 1	-0.485618	10.2553	-4.43358	0.000184337	0.0117647	0.630873
264	37	0	CUST_34363_PI428323385	CG6579	Probe	34647	atilla	CG6579 gene product from transcript CG6579-RB	0.91577	7.12609	4.43104	0.000185515	0.0118219	0.624703
16	34	0	CUST_2133_PI428323385	CG10922	Probe	35305	La	La autoantigen-like	0.548257	13.152	4.4271	0.000187363	0.0119217	0.615098
126	160	0	CUST_15273_PI428323385	CG2120	Probe	31737	CG2120	CG2120 gene product from transcript CG2120-RB	0.513192	5.4422	4.42554	0.000188099	0.0119505	0.611305
60	31	0	CUST_12754_PI428323385	CG17574	Probe	36415	CG17574	CG17574 gene product from transcript CG17574-RA	-0.443068	9.53701	-4.42314	0.000189238	0.0119922	0.605456
194	121	0	CUST_20012_PI428323385	CG32444	Probe	40406	CG32444	CG32444 gene product from transcript CG32444-RA	0.847362	6.29303	4.42296	0.000189324	0.0119922	0.605017
157	48	0	CUST_33509_PI428323385	CG6175	Probe	39271	CG6175	CG6175 gene product from transcript CG6175-RB	-0.450733	7.65908	-4.41332	0.000193971	0.0122682	0.581528
137	22	0	CUST_728_PI428323385	CG10311	Probe	41984	CG10311	CG10311 gene product from transcript CG10311-RA	0.614307	7.82082	4.41046	0.000195371	0.0123279	0.574566
40	38	0	CUST_16163_PI428323385	CG2914	Probe	33229	Ets21C	Ets at 21C	-0.407303	5.50428	-4.4102	0.000195499	0.0123279	0.573928
336	144	0	CUST_35888_PI428323385	CG7203	Probe	34055	CG7203	CG7203 gene product from transcript CG7203-RB	0.499455	5.4982	4.40808	0.000196542	0.0123751	0.568778
288	116	0	CUST_14893_PI428323385	CG1944	Probe	35946	Cyp4p2	CG1944 gene product from transcript CG1944-RA	0.527906	11.379	4.40102	0.000200067	0.0125783	0.551563
32	39	0	CUST_39027_PI428323385	CG8588	Probe	38818	pst	pastrel	-0.695139	10.8618	-4.39673	0.000202233	0.0126955	0.541136
294	119	0	CUST_40652_PI428323385	CG9328	Probe	35344	CG9328	CG9328 gene product from transcript CG9328-RB	-0.615518	9.61848	-4.39248	0.000204407	0.012813	0.530779
66	27	0	CUST_26620_PI428323385	CG42514	Probe	8674108	CG42514	CG42514 gene product from transcript CG42514-RA	0.659743	11.5659	4.38755	0.000206958	0.012935	0.518772
175	114	0	CUST_36722_PI428323385	CG7590	Probe	39270	scyl	scylla	-1.35101	14.2935	-4.38753	0.000206967	0.012935	0.518731
344	87	0	CUST_32890_PI428323385	CG5896	Probe	43273	grass	Gram-positive Specific Serine protease	0.557227	8.85983	4.38668	0.000207409	0.0129435	0.516663
302	129	0	CUST_5581_PI428323385	CG12750	Probe	35099	ncm	nucampholin	-0.423595	10.5798	-4.38562	0.000207965	0.0129589	0.514075
69	146	0	CUST_16007_PI428323385	CG2807	Probe	33235	CG2807	CG2807 gene product from transcript CG2807-RA	-0.278494	12.0545	-4.38042	0.000210704	0.0131032	0.501406
193	113	0	CUST_24592_PI428323385	CG3848	Probe	31149	trr	trithorax-related	0.505264	7.53386	4.38004	0.000210901	0.0131032	0.500503
67	3	0	CUST_14419_PI428323385	CG18543	Probe	38958	mtrm	matrimony	-0.564235	6.23785	-4.37913	0.000211387	0.0131141	0.498272
13	39	0	CUST_20846_PI428323385	CG32809	Probe	31121	CG32809	CG32809 gene product from transcript CG32809-RG	-0.456722	7.02112	-4.37723	0.0002124	0.0131576	0.493645
69	90	0	CUST_29429_PI428323385	CG4381	Probe	48336	GstD3	Glutathione S transferase D3	-0.411035	12.8185	-4.37662	0.000212724	0.0131583	0.49217
74	160	0	CUST_16660_PI428323385	CG30170	Probe	47873	bgcn	benign gonial cell neoplasm	-0.42351	5.89275	-4.37573	0.000213201	0.0131685	0.490001
32	104	0	CUST_40302_PI428323385	CG9170	Probe	32563	CG9170	CG9170 gene product from transcript CG9170-RB	-0.489841	10.3337	-4.37244	0.000214971	0.0132584	0.481995
326	37	0	CUST_27443_PI428323385	CG42732	Probe	5740325	CG42732	CG42732 gene product from transcript CG42732-RH	-0.491216	4.44479	-4.3632	0.000220027	0.0135227	0.459492
251	104	0	CUST_28026_PI428323385	CG43079	Probe	40515	nrm	neuromusculin	0.718014	5.64408	4.36288	0.000220205	0.0135227	0.458713
77	93	0	CUST_27899_PI428323385	CG43051	Probe	12798168	CG43051	CG43051 gene product from transcript CG43051-RB	-0.55989	11.186	-4.36285	0.000220217	0.0135227	0.45866
366	151	0	CUST_20799_PI428323385	CG32788	Probe	43900	Crg-1	Circadianly Regulated Gene	-0.735512	5.64397	-4.36129	0.000221085	0.0135322	0.454849
20	107	0	CUST_12917_PI428323385	CG17686	Probe	43981	DIP1	DISCO Interacting Protein 1	-0.593241	10.1318	-4.36124	0.000221111	0.0135322	0.454736
307	33	0	CUST_12815_PI428323385	CG17612	Probe	33639	CG17612	CG17612 gene product from transcript CG17612-RB	-0.477604	9.55311	-4.36084	0.000221335	0.0135322	0.453758
142	39	0	CUST_7491_PI428323385	CG13888	Probe	38098	Gr61a	Gustatory receptor 61a	0.501125	8.03641	4.3582	0.000222808	0.0136026	0.447338
209	155	0	CUST_2442_PI428323385	CG11066	Probe	35505	scaf	scarface	-0.555008	8.949	-4.35726	0.000223337	0.0136152	0.445043
356	162	0	CUST_6327_PI428323385	CG13194	Probe	36255	pyr	pyramus	0.547221	5.32117	4.3556	0.000224268	0.0136522	0.441016
292	6	0	CUST_3639_PI428323385	CG11655	Probe	32472	CG11655	CG11655 gene product from transcript CG11655-RA	0.557956	7.15179	4.35339	0.000225518	0.0137034	0.435638
299	139	0	CUST_18079_PI428323385	CG31370	Probe	43060	CG31370	CG31370 gene product from transcript CG31370-RB	0.66242	6.21457	4.35297	0.000225759	0.0137034	0.434604
253	20	0	CUST_18943_PI428323385	CG31883	Probe	326169	CG31883	CG31883 gene product from transcript CG31883-RA	-0.439381	5.39517	-4.35125	0.000226736	0.0137429	0.430424
97	31	0	CUST_16166_PI428323385	CG2914	Probe	33229	Ets21C	Ets at 21C	-0.424755	5.56915	-4.34909	0.000227971	0.013798	0.425166
12	39	0	CUST_39048_PI428323385	CG8596	Probe	38813	CG8596	CG8596 gene product from transcript CG8596-RA	0.393508	10.8682	4.34742	0.00022893	0.0138362	0.421103
87	102	0	CUST_18834_PI428323385	CG31808	Probe	10178782	CG31808	CG31808 gene product from transcript CG31808-RC	-0.430759	6.32147	-4.33889	0.00023389	0.0141157	0.400363
134	19	0	CUST_34578_PI428323385	CG6677	Probe	42936	ash2	absent, small, or homeotic discs 2	0.463383	10.3106	4.33703	0.000234991	0.0141619	0.395816
322	21	0	CUST_6445_PI428323385	CG13258	Probe	34959	CG13258	CG13258 gene product from transcript CG13258-RA	-0.722047	7.62218	-4.33517	0.000236089	0.0141847	0.391306
295	135	0	CUST_34784_PI428323385	CG6756	Probe	34618	Tom70	Translocase of outer membrane 70	0.525356	9.33155	4.33473	0.000236352	0.0141847	0.390232
102	110	0	CUST_27349_PI428323385	CG42702	Probe	36609	Oaz	O/E-associated zinc finger protein	0.516751	6.86361	4.33468	0.000236378	0.0141847	0.390122
214	49	0	CUST_11961_PI428323385	CG17104	Probe	34465	CG17104	CG17104 gene product from transcript CG17104-RA	-0.469082	8.16661	-4.33355	0.000237052	0.014192	0.38737
86	160	0	CUST_31680_PI428323385	CG5341	Probe	37142	sec6	CG5341 gene product from transcript CG5341-RA	0.292721	9.68865	4.33335	0.000237172	0.014192	0.386878
337	119	0	CUST_12920_PI428323385	CG17686	Probe	43981	DIP1	DISCO Interacting Protein 1	-0.606663	9.95158	-4.33183	0.000238083	0.0142263	0.383171
197	37	0	CUST_17926_PI428323385	CG31274	Probe	318655	CG31274	CG31274 gene product from transcript CG31274-RA	0.807158	4.79059	4.32949	0.000239487	0.01429	0.37748
274	18	0	CUST_41604_PI428323385	CG9761	Probe	40588	Nep2	Neprilysin 2	0.333719	11.9951	4.3238	0.000242939	0.0144754	0.363637
134	86	0	CUST_5098_PI428323385	CG12405	Probe	246663	Prx2540-1	Peroxiredoxin 2540-1	0.809208	9.92381	4.32227	0.000243872	0.0144994	0.359927
122	8	0	CUST_20859_PI428323385	CG32809	Probe	31121	CG32809	CG32809 gene product from transcript CG32809-RG	-0.568944	7.01203	-4.32146	0.000244368	0.0144994	0.357963
278	119	0	CUST_1084_PI428323385	CG10497	Probe	37447	Sdc	Syndecan	-0.5579	11.4822	-4.32145	0.000244372	0.0144994	0.357946
267	158	0	CUST_19601_PI428323385	CG32201	Probe	317911	CG32201	CG32201 gene product from transcript CG32201-RB	-0.492332	4.56484	-4.31793	0.000246548	0.0145963	0.349369
90	111	0	CUST_10367_PI428323385	CG15415	Probe	33578	Spindly	CG15415 gene product from transcript CG15415-RB	-0.352347	11.151	-4.31769	0.000246697	0.0145963	0.348784
308	134	0	CUST_39507_PI428323385	CG8808	Probe	35970	Pdk	Pyruvate dehydrogenase kinase	0.555569	10.9704	4.31248	0.000249946	0.0147555	0.336128
318	160	0	CUST_40034_PI428323385	CG9059	Probe	32688	CG9059	CG9059 gene product from transcript CG9059-RD	-0.739513	5.00897	-4.31208	0.000250198	0.0147555	0.335154
359	116	0	CUST_15447_PI428323385	CG2210	Probe	43739	awd	abnormal wing discs	0.595522	12.0092	4.3117	0.000250436	0.0147555	0.334232
378	150	0	CUST_1177_PI428323385	CG10539	Probe	38654	S6k	RPS6-p70-protein kinase	0.590938	9.75494	4.30951	0.000251821	0.0148164	0.328898
359	156	0	CUST_1082_PI428323385	CG10497	Probe	37447	Sdc	Syndecan	-0.546612	11.3838	-4.30841	0.00025252	0.0148368	0.326218
194	25	0	CUST_23569_PI428323385	CG34405	Probe	37981	NaCP60E	Na channel protein 60E	-0.392503	7.08744	-4.30506	0.000254655	0.0149414	0.318076
234	29	0	CUST_16986_PI428323385	CG3040	Probe	31642	CG3040	CG3040 gene product from transcript CG3040-RA	0.461153	10.9955	4.30401	0.000255328	0.0149601	0.315522
65	24	0	CUST_18906_PI428323385	CG31864	Probe	318990	Qtzl	Quetzalcoatl	-0.345866	10.9808	-4.29819	0.000259086	0.0151403	0.301389
59	91	0	CUST_16560_PI428323385	CG30101	Probe	36950	CG30101	CG30101 gene product from transcript CG30101-RA	-0.854261	6.37005	-4.29814	0.000259122	0.0151403	0.301257
157	32	0	CUST_3957_PI428323385	CG11847	Probe	43018	Clbn	Caliban	-0.360028	12.4959	-4.29639	0.000260262	0.0151859	0.29701
261	45	0	CUST_28019_PI428323385	CG43079	Probe	40515	nrm	neuromusculin	0.623811	5.52784	4.29291	0.000262551	0.0152983	0.288543
124	34	0	CUST_33342_PI428323385	CG6117	Probe	39733	Pka-C3	cAMP-dependent protein kinase 3	-0.386553	8.47307	-4.28692	0.000266532	0.0154941	0.273988
35	11	0	CUST_26622_PI428323385	CG42514	Probe	8674108	CG42514	CG42514 gene product from transcript CG42514-RA	0.666614	11.6248	4.2864	0.000266881	0.0154941	0.272723
187	24	0	CUST_25998_PI428323385	CG42311	Probe	37038	grh	grainy head	0.601391	12.9222	4.2862	0.000267013	0.0154941	0.272248
19	44	0	CUST_39029_PI428323385	CG8588	Probe	38818	pst	pastrel	-0.691419	10.8096	-4.28498	0.000267835	0.0155204	0.269274
91	46	0	CUST_1911_PI428323385	CG10833	Probe	33749	Cyp28d1	CG10833 gene product from transcript CG10833-RA	-0.771235	5.07304	-4.28437	0.000268247	0.015523	0.267789
180	52	0	CUST_20849_PI428323385	CG32809	Probe	31121	CG32809	CG32809 gene product from transcript CG32809-RG	-0.500117	7.03467	-4.28372	0.00026868	0.0155267	0.266229
119	117	0	CUST_16151_PI428323385	CG2909	Probe	31958	CG2909	CG2909 gene product from transcript CG2909-RA	-0.568061	6.75237	-4.28303	0.000269151	0.0155296	0.264533
218	143	0	CUST_344_PI428323385	CG10151	Probe	36639	CG10151	CG10151 gene product from transcript CG10151-RA	-0.474823	7.33956	-4.28233	0.000269624	0.0155296	0.262836
117	54	0	CUST_37643_PI428323385	CG8038	Probe	38889	CG8038	CG8038 gene product from transcript CG8038-RA	-0.295404	11.2627	-4.28202	0.000269834	0.0155296	0.262085
68	2	0	CUST_16593_PI428323385	CG30118	Probe	37119	CG30118	CG30118 gene product from transcript CG30118-RB	-0.335373	10.5302	-4.28115	0.000270421	0.0155422	0.259983
66	38	0	CUST_31303_PI428323385	CG5144	Probe	39040	CG5144	CG5144 gene product from transcript CG5144-RA	0.877058	5.83067	4.2734	0.000275739	0.0158199	0.241154
50	157	0	CUST_2441_PI428323385	CG11066	Probe	35505	scaf	scarface	-0.585464	8.97083	-4.27302	0.000276002	0.0158199	0.240232
250	117	0	CUST_12566_PI428323385	CG17436	Probe	3354896	vtd	verthandi	-0.323659	12.1229	-4.2694	0.000278524	0.01594	0.231437
186	15	0	CUST_40391_PI428323385	CG9214	Probe	32574	Tob	CG9214 gene product from transcript CG9214-RA	-1.08225	5.81681	-4.26893	0.000278853	0.01594	0.230295
245	120	0	CUST_531_PI428323385	CG10236	Probe	38723	LanA	Laminin A	-0.495038	13.5406	-4.26781	0.000279639	0.0159607	0.227574
177	57	0	CUST_12585_PI428323385	CG1745	Probe	32090	HP5	Heterochromatin protein 5	0.565144	10.2858	4.26552	0.000281254	0.0159607	0.22201
37	113	0	CUST_7230_PI428323385	CG1371	Probe	36053	CG1371	CG1371 gene product from transcript CG1371-RA	0.345147	9.76814	4.26543	0.000281316	0.0159607	0.221794
98	39	0	CUST_29897_PI428323385	CG4495	Probe	33999	CG4495	CG4495 gene product from transcript CG4495-RA	0.525311	9.6143	4.26513	0.000281528	0.0159607	0.221066
101	120	0	CUST_20848_PI428323385	CG32809	Probe	31121	CG32809	CG32809 gene product from transcript CG32809-RG	-0.460861	6.99417	-4.26507	0.000281572	0.0159607	0.220916
89	148	0	CUST_23932_PI428323385	CG3523	Probe	33524	CG3523	CG3523 gene product from transcript CG3523-RA	0.772723	9.77354	4.26489	0.000281703	0.0159607	0.220466
118	149	0	CUST_36332_PI428323385	CG7421	Probe	40433	Nopp140	CG7421 gene product from transcript CG7421-RB	0.451996	8.31292	4.26466	0.000281863	0.0159607	0.219916
257	111	0	CUST_837_PI428323385	CG10363	Probe	35248	TepIV	Thiolester containing protein IV	0.478539	12.3432	4.26325	0.000282868	0.015996	0.216478
30	69	0	CUST_33040_PI428323385	CG5966	Probe	31532	CG5966	CG5966 gene product from transcript CG5966-RA	-0.659197	6.68037	-4.26269	0.000283264	0.015997	0.215123
15	129	0	CUST_137_PI428323385	CG10073	Probe	37225	CG10073	CG10073 gene product from transcript CG10073-RB	0.383336	4.96323	4.26084	0.000284579	0.0160242	0.210647
89	164	0	CUST_21032_PI428323385	CG33048	Probe	39238	Mocs1	Molybdenum cofactor synthesis 1 ortholog	-0.584015	7.15941	-4.26067	0.000284701	0.0160242	0.210234
212	30	0	CUST_1026_PI428323385	CG10473	Probe	35173	Acn	Acinus	-0.374514	11.4177	-4.26042	0.000284885	0.0160242	0.209607
244	6	0	CUST_15197_PI428323385	CG2086	Probe	38218	drpr	draper	-0.477519	5.32782	-4.25591	0.000288128	0.016185	0.198667
314	26	0	CUST_23880_PI428323385	CG3495	Probe	37638	Gmer	GDP-4-keto-6-deoxy-D-mannose 3,5-epimerase/4-reductase	0.433948	11.6451	4.2473	0.00029443	0.016517	0.177755
153	121	0	CUST_11468_PI428323385	CG16790	Probe	41155	CG16790	CG16790 gene product from transcript CG16790-RA	0.41888	8.81929	4.24608	0.000295335	0.016529	0.174788
316	22	0	CUST_7200_PI428323385	CG13695	Probe	50263	gk	geko	0.428615	8.43215	4.24498	0.00029615	0.016529	0.172126
304	116	0	CUST_40327_PI428323385	CG9186	Probe	38150	CG9186	CG9186 gene product from transcript CG9186-RB	-0.375985	11.4314	-4.24491	0.000296203	0.016529	0.171951
21	127	0	CUST_26621_PI428323385	CG42514	Probe	8674108	CG42514	CG42514 gene product from transcript CG42514-RA	0.572554	11.6723	4.2449	0.000296211	0.016529	0.171927
36	37	0	CUST_18574_PI428323385	CG31692	Probe	35265	fbp	fructose-1,6-bisphosphatase	0.32231	11.9819	4.24348	0.000297266	0.016546	0.168489
89	74	0	CUST_37756_PI428323385	CG8083	Probe	35914	CG8083	CG8083 gene product from transcript CG8083-RA	0.566533	5.67967	4.24344	0.0002973	0.016546	0.168381
211	30	0	CUST_22144_PI428323385	CG33653	Probe	49968	Caps	Calcium activated protein for secretion	-0.86849	5.77999	-4.24109	0.000299055	0.0166218	0.162691
11	6	0	CUST_31052_PI428323385	CG5018	Probe	39774	l(3)72Dn	lethal (3) 72Dn	0.374843	9.88159	4.23491	0.000303736	0.0168598	0.147683
4	90	0	CUST_25266_PI428323385	CG4086	Probe	39856	Su(P)	Suppressor of ref(2)P sterility	0.586611	10.891	4.23406	0.000304383	0.0168734	0.145628
15	117	0	CUST_40996_PI428323385	CG9480	Probe	37419	Glycogenin	CG9480 gene product from transcript CG9480-RB	-0.769884	9.21659	-4.23111	0.000306652	0.0169769	0.138451
82	129	0	CUST_33639_PI428323385	CG6214	Probe	34686	MRP	Multidrug-Resistance like Protein 1	-0.42536	10.4453	-4.22711	0.000309742	0.0171255	0.128763
121	17	0	CUST_20026_PI428323385	CG32448	Probe	318032	CG32448	CG32448 gene product from transcript CG32448-RC	0.661297	10.1898	4.22636	0.000310332	0.0171357	0.126924
131	120	0	CUST_16189_PI428323385	CG2928	Probe	37968	Reg-5	Rhythmically expressed gene 5	-0.361924	10.5397	-4.22346	0.000312601	0.0172384	0.119887
96	144	0	CUST_13195_PI428323385	CG17800I	Probe	NA	NA	NA	0.452456	5.54059	4.22019	0.000315177	0.0173578	0.111957
11	121	0	CUST_25759_PI428323385	CG42256	Probe	38788	Dscam2	Down syndrome cell adhesion molecule 2	0.430628	4.80873	4.21584	0.000318633	0.0175253	0.10142
16	72	0	CUST_15995_PI428323385	CG2791	Probe	40941	CD98hc	CD98 heavy chain	-0.258794	13.8566	-4.21137	0.000322234	0.0177002	0.0905654
373	66	0	CUST_3501_PI428323385	CG11563	Probe	43735	CG11563	CG11563 gene product from transcript CG11563-RA	0.333105	12.4237	4.20826	0.000324764	0.017816	0.0830125
122	24	0	CUST_8803_PI428323385	CG14567	Probe	40420	CG14567	CG14567 gene product from transcript CG14567-RA	0.71666	8.655	4.206	0.000326608	0.0178939	0.0775411
257	21	0	CUST_33016_PI428323385	CG5953	Probe	34985	CG5953	CG5953 gene product from transcript CG5953-RA	-0.398985	4.96239	-4.202	0.0003299	0.0180508	0.0678543
192	135	0	CUST_28789_PI428323385	CG43395	Probe	32468	cngl	CNG channel-like	0.354095	4.66277	4.19938	0.000332083	0.0181467	0.0614858
70	107	0	CUST_22469_PI428323385	CG3396	Probe	39621	Ocho	CG3396 gene product from transcript CG3396-RB	-0.343916	9.99809	-4.19663	0.000334382	0.0182487	0.0548232
229	109	0	CUST_39028_PI428323385	CG8588	Probe	38818	pst	pastrel	-0.74727	10.7727	-4.19172	0.000338531	0.0184513	0.0429125
289	37	0	CUST_33621_PI428323385	CG6214	Probe	34686	MRP	Multidrug-Resistance like Protein 1	-0.448568	10.5763	-4.18798	0.000341719	0.0185859	0.0338621
317	97	0	CUST_14839_PI428323385	CG1915	Probe	44013	sls	sallimus	-0.848202	5.20679	-4.18779	0.000341882	0.0185859	0.0334002
75	157	0	CUST_11749_PI428323385	CG16986	Probe	38325	CG16986	CG16986 gene product from transcript CG16986-RA	0.46442	8.97329	4.18722	0.000342373	0.0185886	0.0320164
9	60	0	CUST_23223_PI428323385	CG34313	Probe	5740766	CG34313	CG34313 gene product from transcript CG34313-RA	0.59641	5.20513	4.18228	0.000346648	0.0187965	0.0200325
89	54	0	CUST_13706_PI428323385	CG18069	Probe	43828	CaMKII	Calcium/calmodulin-dependent protein kinase II	-0.451041	11.1176	-4.18087	0.000347879	0.0188391	0.0166097
41	81	0	CUST_22282_PI428323385	CG33772	Probe	3772205	CG33772	CG33772 gene product from transcript CG33772-RC	0.668651	4.42507	4.17382	0.000354088	0.0191507	-0.000470398
12	146	0	CUST_20625_PI428323385	CG32685	Probe	31942	CG32685	CG32685 gene product from transcript CG32685-RC	-0.39019	10.4105	-4.17075	0.000356826	0.0192474	-0.00790562
92	1	0	CUST_20889_PI428323385	CG32822	Probe	318230	CG32822	CG32822 gene product from transcript CG32822-RA	0.387034	5.39015	4.17051	0.000357043	0.0192474	-0.00849353
304	96	0	CUST_27075_PI428323385	CG42663	Probe	36403	CG42663	CG42663 gene product from transcript CG42663-RB	0.377889	5.99825	4.17028	0.000357244	0.0192474	-0.00903585
20	37	0	CUST_33531_PI428323385	CG6185	Probe	39269	Ir68a	Ionotropic receptor 68a	-0.512493	6.7163	-4.16684	0.000360346	0.0193898	-0.0173846
267	148	0	CUST_9056_PI428323385	CG14696	Probe	41317	CG14696	CG14696 gene product from transcript CG14696-RA	0.543407	9.8006	4.16597	0.00036113	0.0194072	-0.0194808
116	101	0	CUST_1763_PI428323385	CG10741	Probe	39521	CG10741	CG10741 gene product from transcript CG10741-RB	-0.306158	11.3942	-4.16431	0.000362639	0.0194635	-0.0235059
199	136	0	CUST_16245_PI428323385	CG2962	Probe	31952	CG2962	CG2962 gene product from transcript CG2962-RA	0.45443	5.60286	4.16011	0.000366478	0.0196445	-0.0336718
229	25	0	CUST_27169_PI428323385	CG42671	Probe	39268	CG42671	CG42671 gene product from transcript CG42671-RG	-0.41222	9.74214	-4.15919	0.000367329	0.0196651	-0.0359104
65	56	0	CUST_38228_PI428323385	CG8249	Probe	36742	CG8249	CG8249 gene product from transcript CG8249-RC	0.59427	7.79222	4.1571	0.000369263	0.0197436	-0.0409793
125	101	0	CUST_20800_PI428323385	CG32788	Probe	43900	Crg-1	Circadianly Regulated Gene	-0.495558	5.79583	-4.15584	0.000370426	0.0197808	-0.0440147
130	6	0	CUST_12412_PI428323385	CG17323	Probe	35138	CG17323	CG17323 gene product from transcript CG17323-RD	0.444943	9.33229	4.1534	0.000372702	0.0198772	-0.0499279
286	74	0	CUST_1712_PI428323385	CG10731	Probe	3772305	CG10731	CG10731 gene product from transcript CG10731-RA	0.436648	9.25969	4.1528	0.000373265	0.019882	-0.0513824
29	32	0	CUST_20395_PI428323385	CG32571	Probe	318094	TwdlX	TweedleX	0.493218	4.50455	4.15028	0.000375636	0.0199831	-0.0574945
173	142	0	CUST_8576_PI428323385	CG14434	Probe	31632	CG14434	CG14434 gene product from transcript CG14434-RA	0.505439	13.3221	4.1497	0.000376181	0.0199869	-0.058895
34	69	0	CUST_33619_PI428323385	CG6214	Probe	34686	MRP	Multidrug-Resistance like Protein 1	-0.488291	10.6078	-4.14886	0.000376968	0.0200035	-0.0609115
185	47	0	CUST_36014_PI428323385	CG7266	Probe	39675	Eip71CD	Ecdysone-induced protein 28/29kD	-0.362414	10.4707	-4.14787	0.000377908	0.0200282	-0.0633147
257	87	0	CUST_25309_PI428323385	CG4103	Probe	34876	l(2)35Bc	lethal (2) 35Bc	0.503615	9.30041	4.1461	0.000379596	0.0200776	-0.0676148
328	114	0	CUST_3147_PI428323385	CG11382	Probe	31069	CG11382	CG11382 gene product from transcript CG11382-RB	-0.44739	4.49446	-4.14589	0.000379792	0.0200776	-0.0681141
19	124	0	CUST_8800_PI428323385	CG14565	Probe	40423	CG14565	CG14565 gene product from transcript CG14565-RA	0.584211	5.92303	4.14421	0.000381395	0.0201371	-0.0721779
268	70	0	CUST_33630_PI428323385	CG6214	Probe	34686	MRP	Multidrug-Resistance like Protein 1	-0.42672	10.0047	-4.1432	0.00038236	0.0201628	-0.0746173
195	131	0	CUST_12324_PI428323385	CG17267	Probe	42454	CG17267	CG17267 gene product from transcript CG17267-RA	0.477922	4.52501	4.13987	0.000385569	0.0203067	-0.0826827
86	141	0	CUST_36628_PI428323385	CG7546	Probe	38844	CG7546	CG7546 gene product from transcript CG7546-RD	-0.323928	10.1178	-4.13875	0.000386653	0.0203383	-0.0853898
77	33	0	CUST_18080_PI428323385	CG31370	Probe	43060	CG31370	CG31370 gene product from transcript CG31370-RB	0.85265	7.28087	4.13377	0.000391518	0.0205465	-0.0974562
159	122	0	CUST_3774_PI428323385	CG11738	Probe	33033	l(1)G0004	lethal (1) G0004	0.392208	10.7165	4.13345	0.000391828	0.0205465	-0.0982193
199	58	0	CUST_37900_PI428323385	CG8120	Probe	41108	HP1e	CG8120 gene product from transcript CG8120-RA	0.80956	4.97289	4.1332	0.000392071	0.0205465	-0.0988176
327	34	0	CUST_1639_PI428323385	CG10704	Probe	39418	toe	twin of eyg	-0.38416	11.5077	-4.13173	0.00039352	0.0205968	-0.102378
276	36	0	CUST_41053_PI428323385	CG9503	Probe	32424	CG9503	CG9503 gene product from transcript CG9503-RA	0.619722	8.3871	4.12963	0.000395597	0.0206799	-0.107457
149	65	0	CUST_41645_PI428323385	CG9771	Probe	40579	Dip2	Dorsal interacting protein 2	0.612226	10.6674	4.12851	0.000396717	0.0207128	-0.110184
351	116	0	CUST_25997_PI428323385	CG42311	Probe	37038	grh	grainy head	0.599829	13.0664	4.12708	0.000398136	0.0207459	-0.113628
258	114	0	CUST_6477_PI428323385	CG13284	Probe	35021	CG13284	CG13284 gene product from transcript CG13284-RA	0.499668	7.67242	4.12688	0.000398335	0.0207459	-0.11411
9	146	0	CUST_9708_PI428323385	CG1503	Probe	33090	CG1503	CG1503 gene product from transcript CG1503-RA	0.552829	5.89761	4.12334	0.000401887	0.0209051	-0.122676
215	145	0	CUST_10580_PI428323385	CG15545	Probe	43658	CG15545	CG15545 gene product from transcript CG15545-RA	0.523723	5.97853	4.12228	0.000402961	0.0209351	-0.12525
68	161	0	CUST_11111_PI428323385	CG15917	Probe	36936	CG15917	CG15917 gene product from transcript CG15917-RA	0.673682	5.60938	4.12078	0.000404477	0.020988	-0.128872
170	116	0	CUST_25976_PI428323385	CG42308	Probe	7354414	CG42308	CG42308 gene product from transcript CG42308-RA	0.389	11.4752	4.11893	0.000406361	0.0210444	-0.133356
13	30	0	CUST_20826_PI428323385	CG3280	Probe	39117	CG3280	CG3280 gene product from transcript CG3280-RD	-0.61799	7.43857	-4.11873	0.000406561	0.0210444	-0.13383
117	113	0	CUST_33510_PI428323385	CG6175	Probe	39271	CG6175	CG6175 gene product from transcript CG6175-RB	-0.443944	7.72966	-4.11526	0.000410119	0.0212026	-0.142236
259	95	0	CUST_6088_PI428323385	CG13053	Probe	50274	CG13053	CG13053 gene product from transcript CG13053-RA	0.982616	10.1307	4.11461	0.000410785	0.021211	-0.1438
285	49	0	CUST_2577_PI428323385	CG11133	Probe	40512	CG11133	CG11133 gene product from transcript CG11133-RA	0.566103	5.35017	4.10886	0.00041675	0.0214927	-0.157706
31	32	0	CUST_14687_PI428323385	CG18789	Probe	317813	CG18789	CG18789 gene product from transcript CG18789-RA	-0.307866	9.01762	-4.10735	0.000418332	0.0215225	-0.16136
57	95	0	CUST_3115_PI428323385	CG11372	Probe	33162	galectin	CG11372 gene product from transcript CG11372-RD	-0.386132	11.7073	-4.10698	0.00041872	0.0215225	-0.162255
39	84	0	CUST_29041_PI428323385	CG43674	Probe	NA	NA	NA	-0.948355	12.0942	-4.10685	0.000418858	0.0215225	-0.162573
47	106	0	CUST_13279_PI428323385	CG17806	Probe	42142	CG17806	CG17806 gene product from transcript CG17806-RA	-0.373851	9.04297	-4.10589	0.00041987	0.0215482	-0.1649
327	44	0	CUST_34448_PI428323385	CG6612	Probe	41318	Adk3	Adenylate kinase-3	0.341399	10.5005	4.10524	0.000420546	0.0215567	-0.16645
347	6	0	CUST_35830_PI428323385	CG7178	Probe	32794	wupA	wings up A	-1.31283	5.24831	-4.10369	0.000422183	0.0216143	-0.170198
224	44	0	CUST_35108_PI428323385	CG6898	Probe	41975	Zip3	Zinc/iron regulated transporter-related protein 3	0.371532	8.78716	4.10268	0.00042326	0.0216432	-0.172654
28	104	0	CUST_2093_PI428323385	CG10904	Probe	37817	CG10904	CG10904 gene product from transcript CG10904-RA	-0.379228	10.6863	-4.10197	0.000424011	0.0216554	-0.174364
25	21	0	CUST_29895_PI428323385	CG4495	Probe	33999	CG4495	CG4495 gene product from transcript CG4495-RA	0.558155	9.61399	4.09766	0.000428619	0.0218642	-0.184789
31	114	0	CUST_4481_PI428323385	CG12090	Probe	38176	CG12090	CG12090 gene product from transcript CG12090-RB	-0.468488	8.39142	-4.09486	0.000431634	0.0219773	-0.191548
294	60	0	CUST_24356_PI428323385	CG3714	Probe	33626	CG3714	CG3714 gene product from transcript CG3714-RC	-0.375058	8.17022	-4.09464	0.000431878	0.0219773	-0.192093
14	36	0	CUST_25081_PI428323385	CG40300	Probe	3355150	2003-08-01	Argonaute 3	-0.589933	5.49799	-4.09397	0.0004326	0.0219876	-0.193704
191	101	0	CUST_18937_PI428323385	CG31875	Probe	318996	CG31875	CG31875 gene product from transcript CG31875-RD	-0.72869	7.77155	-4.09201	0.000434727	0.0220691	-0.198434
40	54	0	CUST_11467_PI428323385	CG16790	Probe	41155	CG16790	CG16790 gene product from transcript CG16790-RA	0.420272	8.82639	4.09141	0.000435386	0.022076	-0.199893
78	20	0	CUST_33355_PI428323385	CG6122	Probe	34521	piwi	CG6122 gene product from transcript CG6122-RA	-0.571697	6.49223	-4.09044	0.000436449	0.0221033	-0.202244
2	114	0	CUST_11278_PI428323385	CG16705	Probe	42791	SPE	Spatzle-Processing Enzyme	0.575734	7.26078	4.08924	0.000437755	0.0221428	-0.205125
315	67	0	CUST_4055_PI428323385	CG11900	Probe	43456	Mesh1	Metazoan SpoT homolog-1	0.422944	9.30335	4.08616	0.000441149	0.022252	-0.212573
169	161	0	CUST_26004_PI428323385	CG42311	Probe	37038	grh	grainy head	0.578663	12.8513	4.08605	0.000441274	0.022252	-0.212845
125	162	0	CUST_36266_PI428323385	CG7391	Probe	38872	Clk	Clock	-0.512401	4.89882	-4.08585	0.000441495	0.022252	-0.213327
124	114	0	CUST_2109_PI428323385	CG10911	Probe	37058	CG10911	CG10911 gene product from transcript CG10911-RA	0.420508	4.3583	4.08354	0.00044406	0.0223437	-0.218912
11	20	0	CUST_19596_PI428323385	CG32196	Probe	317908	CG32196	CG32196 gene product from transcript CG32196-RB	-0.330126	5.32788	-4.08302	0.000444639	0.0223437	-0.22017
282	36	0	CUST_29993_PI428323385	CG4562	Probe	42362	CG4562	CG4562 gene product from transcript CG4562-RB	-0.614761	6.41056	-4.08248	0.000445237	0.0223437	-0.221465
191	17	0	CUST_34580_PI428323385	CG6677	Probe	42936	ash2	absent, small, or homeotic discs 2	0.415872	10.3145	4.08231	0.000445434	0.0223437	-0.221891
6	130	0	CUST_26003_PI428323385	CG42311	Probe	37038	grh	grainy head	0.58098	13.0018	4.08176	0.000446042	0.0223477	-0.223206
211	125	0	CUST_16237_PI428323385	CG2957	Probe	40932	mRpS9	mitochondrial ribosomal protein S9	0.335992	10.8526	4.07766	0.000450649	0.0225517	-0.233114
70	57	0	CUST_21506_PI428323385	CG33230	Probe	2768998	CG33230	CG33230 gene product from transcript CG33230-RA	0.356724	9.45803	4.07557	0.000453016	0.0226298	-0.238163
185	142	0	CUST_37369_PI428323385	CG7922	Probe	42543	CG7922	CG7922 gene product from transcript CG7922-RA	-0.35289	9.86535	-4.07515	0.000453496	0.0226298	-0.239183
206	12	0	CUST_11890_PI428323385	CG17061	Probe	38057	mthl10	methuselah-like 10	0.498842	7.82442	4.07486	0.000453819	0.0226298	-0.239871
280	98	0	CUST_1352_PI428323385	CG10618	Probe	43067	CHKov1	CG10618 gene product from transcript CG10618-RB	-0.541089	10.4685	-4.07213	0.000456941	0.0227586	-0.246479
300	45	0	CUST_25777_PI428323385	CG4226	Probe	33275	GluRIIC	Glutamate receptor IIC	-0.496361	4.68903	-4.07129	0.000457895	0.0227792	-0.248489
226	146	0	CUST_38147_PI428323385	CG8222	Probe	34127	Pvr	PDGF- and VEGF-receptor related	-0.352656	8.51955	-4.07027	0.000459074	0.0227965	-0.250968
249	41	0	CUST_8446_PI428323385	CG14362	Probe	41695	CG14362	CG14362 gene product from transcript CG14362-RA	-0.529782	4.27272	-4.07005	0.000459323	0.0227965	-0.251491
29	124	0	CUST_12450_PI428323385	CG17342	Probe	44672	Lk6	CG17342 gene product from transcript CG17342-RA	-0.477397	10.6843	-4.06544	0.000464654	0.023034	-0.262613
10	153	0	CUST_37952_PI428323385	CG8153	Probe	36697	mus210	mutagen-sensitive 210	-0.320794	11.9575	-4.06467	0.000465554	0.0230479	-0.264478
45	91	0	CUST_24154_PI428323385	CG3630	Probe	31189	CG3630	CG3630 gene product from transcript CG3630-RA	-0.375501	8.18527	-4.06427	0.000466028	0.0230479	-0.265459
2	112	0	CUST_40567_PI428323385	CG9288	Probe	41689	CG9288	CG9288 gene product from transcript CG9288-RA	-0.391467	11.136	-4.06317	0.000467304	0.023084	-0.268095
31	132	0	CUST_40394_PI428323385	CG9214	Probe	32574	Tob	CG9214 gene product from transcript CG9214-RA	-1.05686	5.91934	-4.06126	0.000469547	0.0231676	-0.27271
52	119	0	CUST_6197_PI428323385	CG1311	Probe	38523	CG1311	CG1311 gene product from transcript CG1311-RA	-0.272897	12.21	-4.05874	0.000472528	0.0232875	-0.278809
155	9	0	CUST_3803_PI428323385	CG11759	Probe	32071	Kap3	Kinesin associated protein 3	0.480743	7.21872	4.05538	0.000476519	0.0234567	-0.286913
23	50	0	CUST_27350_PI428323385	CG42702	Probe	36609	Oaz	O/E-associated zinc finger protein	0.526159	6.86836	4.05421	0.000477915	0.023479	-0.289733
51	107	0	CUST_4862_PI428323385	CG12279	Probe	41570	CG12279	CG12279 gene product from transcript CG12279-RA	0.466714	11.8229	4.05301	0.000479351	0.023479	-0.292624
68	12	0	CUST_12923_PI428323385	CG17686	Probe	43981	DIP1	DISCO Interacting Protein 1	-0.565501	9.89437	-4.05281	0.000479595	0.023479	-0.293115
242	112	0	CUST_30123_PI428323385	CG4615	Probe	31656	CG4615	CG4615 gene product from transcript CG4615-RA	0.761664	7.76351	4.0528	0.0004796	0.023479	-0.293123
219	146	0	CUST_14196_PI428323385	CG1840	Probe	32150	CG1840	CG1840 gene product from transcript CG1840-RA	0.431348	8.27666	4.05265	0.000479786	0.023479	-0.293497
178	114	0	CUST_4955_PI428323385	CG12338	Probe	36128	CG12338	CG12338 gene product from transcript CG12338-RA	0.434136	8.30269	4.05221	0.00048031	0.023479	-0.294549
3	98	0	CUST_19054_PI428323385	CG31955	Probe	319045	CG31955	CG31955 gene product from transcript CG31955-RB	0.488183	8.6103	4.04883	0.000484391	0.0236511	-0.302703
186	141	0	CUST_23568_PI428323385	CG34405	Probe	37981	NaCP60E	Na channel protein 60E	-0.357513	7.09909	-4.04604	0.000487787	0.0237894	-0.309435
379	19	0	CUST_34413_PI428323385	CG6598	Probe	41311	Fdh	Formaldehyde dehydrogenase	0.461589	14.7994	4.04555	0.000488386	0.0237911	-0.310617
365	140	0	CUST_32274_PI428323385	CG5626	Probe	39397	CG5626	CG5626 gene product from transcript CG5626-RA	0.49349	8.26191	4.04057	0.000494515	0.0240378	-0.322632
81	145	0	CUST_40906_PI428323385	CG9438	Probe	35587	Cyp6a2	Cytochrome P450-6a2	0.562425	4.96661	4.04051	0.000494592	0.0240378	-0.322782
61	119	0	CUST_31304_PI428323385	CG5144	Probe	39040	CG5144	CG5144 gene product from transcript CG5144-RA	0.786796	5.7215	4.03931	0.000496087	0.0240827	-0.325689
271	120	0	CUST_9982_PI428323385	CG1516	Probe	36020	CG1516	CG1516 gene product from transcript CG1516-RP	0.488637	10.215	4.03758	0.000498238	0.0241594	-0.329857
74	84	0	CUST_33317_PI428323385	CG6105	Probe	46069	l(2)06225	lethal (2) 06225	0.260229	15.4004	4.03658	0.000499483	0.024192	-0.332263
61	127	0	CUST_11484_PI428323385	CG16800	Probe	34693	CG16800	CG16800 gene product from transcript CG16800-RB	-0.499642	6.22184	-4.03475	0.000501778	0.0242726	-0.336678
64	128	0	CUST_36622_PI428323385	CG7546	Probe	38844	CG7546	CG7546 gene product from transcript CG7546-RD	-0.332282	10.1852	-4.03433	0.0005023	0.0242726	-0.33768
59	116	0	CUST_7494_PI428323385	CG13889	Probe	38099	CG13889	CG13889 gene product from transcript CG13889-RA	0.286222	5.86866	4.03245	0.000504676	0.0243596	-0.342226
39	148	0	CUST_13823_PI428323385	CG18131	Probe	33331	CG18131	CG18131 gene product from transcript CG18131-RF	0.404037	5.00193	4.03177	0.000505537	0.0243733	-0.343869
53	90	0	CUST_33295_PI428323385	CG6098	Probe	34449	Lrr47	Leucine-rich repeat 47	0.367855	10.4504	4.03119	0.000506274	0.0243809	-0.345271
95	92	0	CUST_33613_PI428323385	CG6214	Probe	34686	MRP	Multidrug-Resistance like Protein 1	-0.498899	10.619	-4.02768	0.000510743	0.0245681	-0.353736
14	79	0	CUST_33631_PI428323385	CG6214	Probe	34686	MRP	Multidrug-Resistance like Protein 1	-0.454532	10.6731	-4.02412	0.000515311	0.0247596	-0.362313
32	82	0	CUST_40488_PI428323385	CG9252	Probe	35380	del	deadlock	-0.6136	9.34951	-4.02293	0.000516848	0.0248052	-0.365181
54	83	0	CUST_29042_PI428323385	CG43674	Probe	NA	NA	NA	-0.889982	11.9519	-4.02082	0.000519576	0.0249077	-0.370251
376	163	0	CUST_12414_PI428323385	CG17323	Probe	35138	CG17323	CG17323 gene product from transcript CG17323-RD	0.42129	9.31491	4.01868	0.000522366	0.0250131	-0.375409
13	118	0	CUST_37849_PI428323385	CG8108	Probe	39161	CG8108	CG8108 gene product from transcript CG8108-RA	-0.311493	11.0743	-4.01808	0.000523157	0.0250226	-0.376868
176	36	0	CUST_5896_PI428323385	CG12947	Probe	41201	CG12947	CG12947 gene product from transcript CG12947-RB	-0.502952	6.52221	-4.0165	0.000525231	0.0250933	-0.380678
269	62	0	CUST_16591_PI428323385	CG30118	Probe	37119	CG30118	CG30118 gene product from transcript CG30118-RB	-0.32705	10.5603	-4.01273	0.00053021	0.0253025	-0.389764
310	26	0	CUST_39508_PI428323385	CG8808	Probe	35970	Pdk	Pyruvate dehydrogenase kinase	0.518803	11.1198	4.01186	0.000531369	0.0253034	-0.391866
313	31	0	CUST_12016_PI428323385	CG17134	Probe	34494	CG17134	CG17134 gene product from transcript CG17134-RA	1.03141	4.89559	4.01181	0.000531428	0.0253034	-0.391974
133	150	0	CUST_9983_PI428323385	CG1516	Probe	36020	CG1516	CG1516 gene product from transcript CG1516-RP	0.577504	10.2087	4.0056	0.000539746	0.0256705	-0.406928
10	70	0	CUST_3419_PI428323385	CG11516	Probe	43469	Ptp99A	Protein tyrosine phosphatase 99A	-0.493221	9.04469	-4.00489	0.000540714	0.0256876	-0.408654
129	38	0	CUST_36215_PI428323385	CG7367	Probe	34094	CG7367	CG7367 gene product from transcript CG7367-RB	0.48728	5.56278	4.00387	0.000542086	0.0257238	-0.411092
192	159	0	CUST_12315_PI428323385	CG17264	Probe	33511	CG17264	CG17264 gene product from transcript CG17264-RA	0.473301	5.4569	4.0028	0.00054354	0.0257638	-0.413672
241	151	0	CUST_7171_PI428323385	CG1368	Probe	32361	CG1368	CG1368 gene product from transcript CG1368-RA	0.81276	7.94572	4.00211	0.000544481	0.0257794	-0.415338
293	52	0	CUST_15070_PI428323385	CG2023	Probe	40724	CG2023	CG2023 gene product from transcript CG2023-RA	-0.484539	6.53897	-3.99909	0.000548607	0.0259153	-0.422605
218	159	0	CUST_36630_PI428323385	CG7546	Probe	38844	CG7546	CG7546 gene product from transcript CG7546-RD	-0.338306	10.0943	-3.99887	0.000548912	0.0259153	-0.423141
64	140	0	CUST_31495_PI428323385	CG5235	Probe	39758	CG5235	CG5235 gene product from transcript CG5235-RA	-0.32808	9.73179	-3.99863	0.000549239	0.0259153	-0.423713
115	147	0	CUST_28452_PI428323385	CG43244	Probe	12798420	CG43244	CG43244 gene product from transcript CG43244-RA	0.354426	4.39255	3.99789	0.00055026	0.0259153	-0.425502
90	139	0	CUST_26810_PI428323385	CG42572	Probe	36272	MCPH1	Microcephalin	0.339521	7.71253	3.99777	0.000550423	0.0259153	-0.425786
102	125	0	CUST_36012_PI428323385	CG7266	Probe	39675	Eip71CD	Ecdysone-induced protein 28/29kD	-0.365312	10.3569	-3.99574	0.000553223	0.0260181	-0.430671
98	95	0	CUST_20493_PI428323385	CG32625	Probe	318128	CG32625	CG32625 gene product from transcript CG32625-RA	-0.749833	6.25207	-3.99352	0.000556316	0.0261345	-0.436039
191	6	0	CUST_25992_PI428323385	CG42311	Probe	37038	grh	grainy head	0.577477	12.9174	3.98996	0.000561286	0.0263386	-0.444601
34	135	0	CUST_7172_PI428323385	CG1368	Probe	32361	CG1368	CG1368 gene product from transcript CG1368-RA	0.860873	8.34898	3.98756	0.000564661	0.0264652	-0.450372
223	157	0	CUST_24628_PI428323385	CG3861	Probe	31579	kdn	knockdown	0.436442	9.27883	3.98715	0.000565239	0.0264652	-0.451357
151	66	0	CUST_15396_PI428323385	CG2184	Probe	43587	Mlc2	Myosin light chain 2	-1.04137	10.758	-3.98475	0.00056865	0.0265954	-0.457148
56	62	0	CUST_29473_PI428323385	CG43867	Probe	NA	NA	NA	0.277508	5.89046	3.9838	0.00057	0.026629	-0.45943
7	70	0	CUST_23894_PI428323385	CG3501	Probe	37635	CG3501	CG3501 gene product from transcript CG3501-RA	0.448828	10.9163	3.9817	0.000572991	0.0267192	-0.464467
331	25	0	CUST_3122_PI428323385	CG11372	Probe	33162	galectin	CG11372 gene product from transcript CG11372-RD	-0.314066	11.3776	-3.98156	0.000573197	0.0267192	-0.464813
303	118	0	CUST_13414_PI428323385	CG17888	Probe	45588	Pdp1	PAR-domain protein 1	-0.680285	8.55813	-3.98028	0.000575031	0.0267751	-0.467887
235	99	0	CUST_22602_PI428323385	CG34002	Probe	3885644	CG34002	CG34002 gene product from transcript CG34002-RB	-1.03571	6.6302	-3.97927	0.000576491	0.0268067	-0.470327
109	72	0	CUST_33638_PI428323385	CG6214	Probe	34686	MRP	Multidrug-Resistance like Protein 1	-0.49319	10.0247	-3.97893	0.000576981	0.0268067	-0.471145
98	49	0	CUST_36781_PI428323385	CG7627	Probe	34148	CG7627	CG7627 gene product from transcript CG7627-RB	-0.42997	10.7102	-3.9779	0.000578475	0.0268466	-0.473634
36	117	0	CUST_6066_PI428323385	CG13041	Probe	39801	CG13041	CG13041 gene product from transcript CG13041-RA	-0.569916	8.93245	-3.97515	0.000582462	0.0270019	-0.480243
341	130	0	CUST_11894_PI428323385	CG17064	Probe	36498	mars	CG17064 gene product from transcript CG17064-RB	-0.494862	10.3958	-3.97109	0.000588396	0.0272329	-0.489997
65	153	0	CUST_33676_PI428323385	CG6232	Probe	34435	CG6232	CG6232 gene product from transcript CG6232-RB	0.354085	5.2205	3.97086	0.000588735	0.0272329	-0.490552
231	3	0	CUST_11888_PI428323385	CG17061	Probe	38057	mthl10	methuselah-like 10	0.585405	6.52208	3.96894	0.000591566	0.0272997	-0.495168
66	121	0	CUST_11481_PI428323385	CG16799	Probe	37340	CG16799	CG16799 gene product from transcript CG16799-RA	0.880692	5.85144	3.96892	0.000591594	0.0272997	-0.495213
229	21	0	CUST_39491_PI428323385	CG8800	Probe	35962	CG8800	CG8800 gene product from transcript CG8800-RA	1.00923	7.61613	3.96857	0.000592122	0.0272997	-0.496072
200	45	0	CUST_27352_PI428323385	CG42702	Probe	36609	Oaz	O/E-associated zinc finger protein	0.589883	6.86978	3.96782	0.000593232	0.0273211	-0.497874
33	123	0	CUST_13328_PI428323385	CG17834	Probe	34191	CG17834	CG17834 gene product from transcript CG17834-RA	-0.585294	8.10221	-3.96651	0.000595181	0.0273809	-0.50103
261	142	0	CUST_35655_PI428323385	CG7107	Probe	32314	up	upheld	-0.837192	5.08668	-3.96578	0.000596266	0.027401	-0.502783
49	79	0	CUST_25993_PI428323385	CG42311	Probe	37038	grh	grainy head	0.556652	13.0406	3.96406	0.000598833	0.027489	-0.506916
55	17	0	CUST_4357_PI428323385	CG12052	Probe	44548	lola	longitudinals lacking	-0.498769	10.4813	-3.96334	0.000599913	0.0275086	-0.50865
174	62	0	CUST_37842_PI428323385	CG8104	Probe	39169	nudE	CG8104 gene product from transcript CG8104-RB	-0.531693	9.45716	-3.96215	0.000601693	0.0275603	-0.511501
19	71	0	CUST_8076_PI428323385	CG14181	Probe	39051	Use1	CG14181 gene product from transcript CG14181-RA	0.295636	11.2846	3.95959	0.000605565	0.0277075	-0.517671
122	37	0	CUST_30545_PI428323385	CG4818	Probe	39814	Cpr72Ea	Cuticular protein 72Ea	0.675254	6.73705	3.95888	0.000606639	0.0277266	-0.519377
166	24	0	CUST_9051_PI428323385	CG14694	Probe	41307	CG14694	CG14694 gene product from transcript CG14694-RA	0.356001	4.64031	3.9566	0.000610095	0.0278544	-0.524841
317	121	0	CUST_29737_PI428323385	CG4415	Probe	33279	CG4415	CG4415 gene product from transcript CG4415-RA	0.614659	5.34168	3.95326	0.000615214	0.0280578	-0.532879
276	97	0	CUST_33479_PI428323385	CG6169	Probe	39722	Dcp2	Decapping protein 2	-0.533219	11.7751	-3.95271	0.000616057	0.0280659	-0.534197
79	73	0	CUST_39996_PI428323385	CG9040	Probe	39546	CG9040	CG9040 gene product from transcript CG9040-RA	0.780018	4.59903	3.95124	0.000618316	0.0281384	-0.537718
308	57	0	CUST_26002_PI428323385	CG42311	Probe	37038	grh	grainy head	0.581586	13.0556	3.94997	0.000620289	0.0281978	-0.540782
27	37	0	CUST_20861_PI428323385	CG32809	Probe	31121	CG32809	CG32809 gene product from transcript CG32809-RG	-0.470474	6.96137	-3.9489	0.000621948	0.0282427	-0.543351
298	109	0	CUST_8422_PI428323385	CG1435	Probe	31669	CBP	sarcoplasmic calcium-binding protein	-0.424996	12.4071	-3.94784	0.000623593	0.028287	-0.545892
163	86	0	CUST_14523_PI428323385	CG1864	Probe	35332	Hr38	Hormone receptor-like in 38	-0.330632	4.6965	-3.94709	0.000624773	0.0282941	-0.547711
304	138	0	CUST_30290_PI428323385	CG4694	Probe	34992	her	hermaphrodite	-0.401635	11.134	-3.94688	0.000625092	0.0282941	-0.548201
159	155	0	CUST_10140_PI428323385	CG15258	Probe	34904	CG15258	CG15258 gene product from transcript CG15258-RA	0.696641	5.02711	3.94357	0.000630284	0.0284986	-0.556157
303	140	0	CUST_11885_PI428323385	CG17061	Probe	38057	mthl10	methuselah-like 10	0.534887	7.31153	3.93984	0.000636177	0.0287342	-0.565107
134	21	0	CUST_33873_PI428323385	CG6339	Probe	37564	rad50	CG6339 gene product from transcript CG6339-RE	-0.43093	11.8248	-3.93906	0.00063743	0.0287433	-0.566999
51	75	0	CUST_258_PI428323385	CG10112	Probe	36613	Cpr51A	Cuticular protein 51A	0.82538	11.6936	3.93886	0.000637741	0.0287433	-0.567469
342	99	0	CUST_25382_PI428323385	CG41265	Probe	5740691	l(2)41Ab	lethal (2) 41Ab	-0.608177	6.49861	-3.93354	0.000646271	0.0290787	-0.580245
21	120	0	CUST_12433_PI428323385	CG17332	Probe	34997	VhaSFD	Vacuolar H[+]-ATPase SFD subunit	0.568625	7.37431	3.93336	0.00064656	0.0290787	-0.580676
92	111	0	CUST_36269_PI428323385	CG7391	Probe	38872	Clk	Clock	-0.572017	4.89815	-3.93278	0.000647504	0.0290901	-0.582078
100	51	0	CUST_13702_PI428323385	CG18069	Probe	43828	CaMKII	Calcium/calmodulin-dependent protein kinase II	-0.421909	11.1224	-3.93195	0.000648851	0.0290947	-0.584077
50	48	0	CUST_40868_PI428323385	CG9427	Probe	41164	CG9427	CG9427 gene product from transcript CG9427-RA	0.375154	12.7224	3.93134	0.000649838	0.0290947	-0.585538
43	55	0	CUST_23153_PI428323385	CG34283	Probe	5740817	CG34283	CG34283 gene product from transcript CG34283-RA	0.40651	4.79465	3.93127	0.000649944	0.0290947	-0.585695
341	127	0	CUST_27482_PI428323385	CG42734	Probe	38863	Ank2	Ankyrin 2	-0.538536	4.51051	-3.93101	0.000650366	0.0290947	-0.58632
15	140	0	CUST_25994_PI428323385	CG42311	Probe	37038	grh	grainy head	0.560913	12.9156	3.93014	0.000651778	0.0291218	-0.588405
234	116	0	CUST_39705_PI428323385	CG8902	Probe	33992	Nuf2	CG8902 gene product from transcript CG8902-RA	-0.271822	11.6837	-3.92979	0.000652352	0.0291218	-0.589252
8	112	0	CUST_17893_PI428323385	CG31251	Probe	318645	CG31251	CG31251 gene product from transcript CG31251-RA	-0.35406	10.7943	-3.92511	0.000660018	0.0294329	-0.600485
281	25	0	CUST_23571_PI428323385	CG34405	Probe	37981	NaCP60E	Na channel protein 60E	-0.350113	7.1189	-3.92393	0.00066197	0.0294781	-0.603323
220	29	0	CUST_38236_PI428323385	CG8253	Probe	36743	tun	tungus	0.355952	9.01535	3.92365	0.000662429	0.0294781	-0.60399
34	150	0	CUST_41273_PI428323385	CG9614	Probe	40104	pip	pipe	0.547133	7.5732	3.92312	0.000663307	0.029486	-0.605263
194	146	0	CUST_8136_PI428323385	CG14211	Probe	32963	MKP-4	MAPK Phosphatase 4	0.527523	8.09781	3.92151	0.000665982	0.0295413	-0.609133
268	157	0	CUST_20825_PI428323385	CG3280	Probe	39117	CG3280	CG3280 gene product from transcript CG3280-RD	-0.729294	7.42049	-3.92115	0.00066658	0.0295413	-0.609996
381	28	0	CUST_12922_PI428323385	CG17686	Probe	43981	DIP1	DISCO Interacting Protein 1	-0.576799	10.0467	-3.92111	0.00066665	0.0295413	-0.610096
311	10	0	CUST_17577_PI428323385	CG31100	Probe	41075	CG31100	CG31100 gene product from transcript CG31100-RA	0.801649	6.39956	3.92051	0.000667637	0.029554	-0.61152
90	21	0	CUST_6105_PI428323385	CG13062	Probe	39799	CG13062	CG13062 gene product from transcript CG13062-RB	-0.545417	5.5342	-3.9187	0.00067067	0.0296283	-0.615877
28	39	0	CUST_30478_PI428323385	CG4778	Probe	34336	obst-B	obstructor-B	0.521611	10.9208	3.91867	0.000670721	0.0296283	-0.615949
180	119	0	CUST_3210_PI428323385	CG11409	Probe	31078	CG11409	CG11409 gene product from transcript CG11409-RB	0.375826	8.417	3.91737	0.000672898	0.0296698	-0.619065
339	1	0	CUST_12687_PI428323385	CG17527	Probe	37110	GstE5	Glutathione S transferase E5	0.636492	8.54338	3.91727	0.000673066	0.0296698	-0.619305
53	112	0	CUST_20809_PI428323385	CG32792	Probe	318213	CG32792	CG32792 gene product from transcript CG32792-RG	-0.376289	4.88169	-3.91541	0.00067619	0.0297764	-0.623756
183	117	0	CUST_33623_PI428323385	CG6214	Probe	34686	MRP	Multidrug-Resistance like Protein 1	-0.43406	10.6045	-3.91278	0.000680644	0.0299412	-0.630067
250	15	0	CUST_10876_PI428323385	CG15745	Probe	32283	CG15745	CG15745 gene product from transcript CG15745-RB	-0.321708	5.95706	-3.90847	0.000688007	0.0302201	-0.640409
248	45	0	CUST_16448_PI428323385	CG3006	Probe	37814	Fmo-1	Flavin-containing monooxygenase 1	0.448336	4.67558	3.90771	0.000689309	0.0302201	-0.642227
101	53	0	CUST_18582_PI428323385	CG31694	Probe	33489	CG31694	CG31694 gene product from transcript CG31694-RA	-0.422152	9.36589	-3.90745	0.000689767	0.0302201	-0.642864
251	43	0	CUST_25319_PI428323385	CG4108	Probe	40036	Chmp1	CG4108 gene product from transcript CG4108-RA	0.280812	11.511	3.9074	0.000689848	0.0302201	-0.642978
266	44	0	CUST_25180_PI428323385	CG40498	Probe	3354890	CG40498	CG40498 gene product from transcript CG40498-RF	-0.407163	4.51014	-3.90559	0.000692974	0.0303255	-0.647323
375	128	0	CUST_5314_PI428323385	CG12559	Probe	3354888	rl	rolled	-0.498624	8.17568	-3.90317	0.000697172	0.0304776	-0.653127
203	146	0	CUST_27222_PI428323385	CG42677	Probe	43946	wb	wing blister	0.420454	8.33583	3.90232	0.000698652	0.0305107	-0.655165
350	77	0	CUST_32019_PI428323385	CG5504	Probe	48844	l(2)tid	lethal (2) tumorous imaginal discs	0.441781	9.91518	3.90117	0.000700663	0.0305669	-0.657927
234	25	0	CUST_36097_PI428323385	CG7314	Probe	39322	Bmcp	CG7314 gene product from transcript CG7314-RB	-0.536405	7.06627	-3.90044	0.000701925	0.0305903	-0.659657
138	46	0	CUST_10004_PI428323385	CG15170	Probe	35160	CG15170	CG15170 gene product from transcript CG15170-RA	0.613124	4.56078	3.89974	0.000703157	0.0306124	-0.661343
307	127	0	CUST_29292_PI428323385	CG43751	Probe	NA	NA	NA	-0.413169	5.21855	-3.89756	0.00070699	0.0307475	-0.666566
133	102	0	CUST_33570_PI428323385	CG6199	Probe	39265	Plod	procollagen lysyl hydroxylase	0.384301	8.2695	3.89713	0.000707756	0.0307491	-0.667606
81	152	0	CUST_29978_PI428323385	CG4554	Probe	37570	CG4554	CG4554 gene product from transcript CG4554-RA	0.483993	9.36629	3.89653	0.000708811	0.0307633	-0.669039
111	27	0	CUST_7376_PI428323385	CG13800	Probe	38305	CG13800	CG13800 gene product from transcript CG13800-RB	0.469669	7.5649	3.89367	0.000713896	0.0309521	-0.675907
304	142	0	CUST_10153_PI428323385	CG15267	Probe	34891	dao	down and out	-0.559664	4.41425	-3.8902	0.000720085	0.0311884	-0.684202
251	80	0	CUST_36237_PI428323385	CG7378	Probe	32888	CG7378	CG7378 gene product from transcript CG7378-RB	-0.489525	4.69104	-3.88887	0.000722477	0.0312599	-0.687388
23	104	0	CUST_34098_PI428323385	CG6447	Probe	43203	TwdlL	TweedleL	0.684967	6.53325	3.88788	0.00072428	0.0313058	-0.689782
106	32	0	CUST_7199_PI428323385	CG13695	Probe	50263	gk	geko	0.343541	8.46888	3.88299	0.000733154	0.031657	-0.701482
357	142	0	CUST_30621_PI428323385	CG4839	Probe	34348	CG4839	CG4839 gene product from transcript CG4839-RB	0.56899	6.15249	3.8825	0.000734048	0.0316631	-0.702652
33	156	0	CUST_17085_PI428323385	CG30456	Probe	36929	CG30456	CG30456 gene product from transcript CG30456-RB	0.509357	5.1909	3.88177	0.000735383	0.0316769	-0.704398
166	8	0	CUST_22686_PI428323385	CG34057	Probe	3885645	CG34057	CG34057 gene product from transcript CG34057-RA	-0.406003	6.01373	-3.88151	0.000735868	0.0316769	-0.705031
295	57	0	CUST_33633_PI428323385	CG6214	Probe	34686	MRP	Multidrug-Resistance like Protein 1	-0.459377	10.5615	-3.87797	0.000742398	0.0319254	-0.713518
283	26	0	CUST_32333_PI428323385	CG5653	Probe	39024	CG5653	CG5653 gene product from transcript CG5653-RA	-0.619946	4.48141	-3.87676	0.000744632	0.0319671	-0.716405
315	65	0	CUST_15691_PI428323385	CG2469	Probe	38149	CG2469	CG2469 gene product from transcript CG2469-RB	0.473483	9.08095	3.87663	0.000744883	0.0319671	-0.716728
134	151	0	CUST_3423_PI428323385	CG11516	Probe	43469	Ptp99A	Protein tyrosine phosphatase 99A	-0.489783	8.85401	-3.8745	0.000748842	0.0321043	-0.72182
40	21	0	CUST_2508_PI428323385	CG11100	Probe	40514	Mes2	CG11100 gene product from transcript CG11100-RB	0.461396	8.74315	3.87373	0.000750273	0.032133	-0.723654
355	77	0	CUST_24798_PI428323385	CG3944	Probe	44207	ND23	NADH:ubiquinone reductase 23kD subunit precursor	0.343404	10.3481	3.87247	0.000752646	0.032202	-0.726687
199	16	0	CUST_25909_PI428323385	CG42281	Probe	34665	bun	bunched	-0.443311	7.11121	-3.87066	0.000756042	0.0323145	-0.73101
78	160	0	CUST_21854_PI428323385	CG33498	Probe	2768887	CG33498	CG33498 gene product from transcript CG33498-RA	0.606585	10.4514	3.86991	0.000757449	0.0323419	-0.732797
248	11	0	CUST_12812_PI428323385	CG17610	Probe	34171	grk	gurken	-0.467666	4.50549	-3.86925	0.0007587	0.0323625	-0.734381
5	149	0	CUST_9426_PI428323385	CG14907	Probe	42031	CG14907	CG14907 gene product from transcript CG14907-RB	-0.491666	9.03583	-3.86795	0.000761177	0.0324354	-0.737511
138	39	0	CUST_3833_PI428323385	CG11779	Probe	42298	CG11779	CG11779 gene product from transcript CG11779-RB	0.548526	7.13513	3.86709	0.000762793	0.0324714	-0.739548
163	58	0	CUST_14450_PI428323385	CG1857	Probe	45908	nec	necrotic	0.578168	6.49452	3.86595	0.000764974	0.0325286	-0.742291
3	77	0	CUST_2507_PI428323385	CG11100	Probe	40514	Mes2	CG11100 gene product from transcript CG11100-RB	0.408951	8.96684	3.86558	0.000765679	0.0325286	-0.743174
85	105	0	CUST_14310_PI428323385	CG18468	Probe	36957	Lhr	Lethal hybrid rescue	-0.333555	9.34166	-3.86139	0.00077371	0.0328263	-0.753196
209	96	0	CUST_4856_PI428323385	CG12275	Probe	43321	RpS10a	Ribosomal protein S10a	0.426664	5.20843	3.86074	0.000774958	0.0328263	-0.754743
31	11	0	CUST_6814_PI428323385	CG13465	Probe	50282	CG13465	CG13465 gene product from transcript CG13465-RA	0.332585	4.73473	3.86071	0.00077502	0.0328263	-0.754819
179	46	0	CUST_18435_PI428323385	CG31638	Probe	33910	CG31638	CG31638 gene product from transcript CG31638-RA	0.535199	7.33978	3.8598	0.000776789	0.0328682	-0.757008
176	142	0	CUST_28744_PI428323385	CG43374	Probe	31935	Cht6	CG43374 gene product from transcript CG43374-RC	-0.694584	9.60233	-3.85932	0.00077772	0.0328747	-0.758159
287	26	0	CUST_25586_PI428323385	CG4210	Probe	41832	CG4210	CG4210 gene product from transcript CG4210-RC	0.545858	10.5727	3.85881	0.000778696	0.0328829	-0.759363
284	108	0	CUST_12565_PI428323385	CG17436	Probe	3354896	vtd	verthandi	-0.304068	12.5279	-3.85713	0.000781965	0.0329588	-0.763386
276	138	0	CUST_5534_PI428323385	CG12725	Probe	32298	CG12725	CG12725 gene product from transcript CG12725-RA	-0.444672	4.83061	-3.85709	0.000782055	0.0329588	-0.763496
279	79	0	CUST_22470_PI428323385	CG3396	Probe	39621	Ocho	CG3396 gene product from transcript CG3396-RB	-0.326908	9.54761	-3.85331	0.000789439	0.0332368	-0.77252
137	109	0	CUST_10761_PI428323385	CG15661	Probe	37421	CG15661	CG15661 gene product from transcript CG15661-RA	-0.434828	5.99405	-3.84989	0.000796206	0.0334792	-0.780714
149	24	0	CUST_17463_PI428323385	CG31057	Probe	326116	tau	CG31057 gene product from transcript CG31057-RA	-0.604965	5.27808	-3.8496	0.000796783	0.0334792	-0.781409
114	54	0	CUST_4338_PI428323385	CG12047	Probe	44839	mud	mushroom body defect	-0.551225	7.36224	-3.84868	0.000798612	0.0335227	-0.783611
203	10	0	CUST_27403_PI428323385	CG42720	Probe	10178794	CG42720	CG42720 gene product from transcript CG42720-RA	-0.499273	4.38243	-3.84809	0.000799785	0.0335385	-0.78502
254	4	0	CUST_6908_PI428323385	CG13532	Probe	37632	CG13532	CG13532 gene product from transcript CG13532-RA	-0.340884	4.91627	-3.84563	0.000804691	0.0337107	-0.790891
44	6	0	CUST_36542_PI428323385	CG7514	Probe	38571	CG7514	CG7514 gene product from transcript CG7514-RA	0.617874	4.30938	3.84493	0.000806096	0.0337361	-0.792565
270	113	0	CUST_3342_PI428323385	CG11486	Probe	38369	CG11486	CG11486 gene product from transcript CG11486-RG	-0.903508	11.6012	-3.84397	0.000808035	0.0337837	-0.794872
102	157	0	CUST_12926_PI428323385	CG17686	Probe	43981	DIP1	DISCO Interacting Protein 1	-0.45649	10.2246	-3.83965	0.00081676	0.0341147	-0.805181
184	52	0	CUST_19736_PI428323385	CG3227	Probe	33441	CG3227	CG3227 gene product from transcript CG3227-RA	-0.291178	10.6886	-3.83814	0.000819846	0.0342097	-0.8088
207	133	0	CUST_10722_PI428323385	CG15629	Probe	33679	CG15629	CG15629 gene product from transcript CG15629-RA	-0.490119	5.61244	-3.83726	0.000821645	0.0342174	-0.810904
334	132	0	CUST_39846_PI428323385	CG8967	Probe	36283	otk	off-track	-0.53134	8.90795	-3.8372	0.00082177	0.0342174	-0.81105
148	132	0	CUST_39905_PI428323385	CG9003	Probe	36244	CG9003	CG9003 gene product from transcript CG9003-RD	-0.576446	6.5896	-3.83686	0.000822462	0.0342174	-0.811858
165	59	0	CUST_2886_PI428323385	CG11279	Probe	39486	CG11279	CG11279 gene product from transcript CG11279-RA	0.418331	10.6233	3.83521	0.000825843	0.0343006	-0.815796
303	90	0	CUST_33627_PI428323385	CG6214	Probe	34686	MRP	Multidrug-Resistance like Protein 1	-0.42811	10.5156	-3.83509	0.000826089	0.0343006	-0.816081
201	158	0	CUST_25990_PI428323385	CG42311	Probe	37038	grh	grainy head	0.561482	12.8958	3.83337	0.000829633	0.0343902	-0.82019
27	52	0	CUST_39954_PI428323385	CG9023	Probe	36236	Drip	CG9023 gene product from transcript CG9023-RA	0.396857	9.46355	3.83305	0.000830296	0.0343902	-0.820956
156	132	0	CUST_6652_PI428323385	CG1338	Probe	33058	hydra	CG1338 gene product from transcript CG1338-RA	-0.515965	5.7693	-3.83286	0.000830693	0.0343902	-0.821415
189	130	0	CUST_29522_PI428323385	CG43897	Probe	NA	NA	NA	-0.611612	8.09794	-3.8321	0.000832266	0.0344216	-0.823231
40	93	0	CUST_25527_PI428323385	CG4174	Probe	40023	CG4174	CG4174 gene product from transcript CG4174-RB	-0.533464	5.26422	-3.83139	0.000833737	0.0344486	-0.824925
14	7	0	CUST_7300_PI428323385	CG13749	Probe	35894	CG13749	CG13749 gene product from transcript CG13749-RB	0.889974	7.31149	3.83041	0.000835768	0.0344808	-0.82726
173	132	0	CUST_27600_PI428323385	CG42774	Probe	10178960	pre-mod(mdg4)-AE	CG42774 gene product from transcript CG42774-RA	0.302382	9.35411	3.83023	0.00083615	0.0344808	-0.827699
92	104	0	CUST_33635_PI428323385	CG6214	Probe	34686	MRP	Multidrug-Resistance like Protein 1	-0.430707	10.6035	-3.82403	0.000849155	0.0349694	-0.842509
116	154	0	CUST_31088_PI428323385	CG5022	Probe	34398	CG5022	CG5022 gene product from transcript CG5022-RA	-0.468862	5.08481	-3.82379	0.000849658	0.0349694	-0.843077
253	62	0	CUST_30645_PI428323385	CG4849	Probe	43358	CG4849	CG4849 gene product from transcript CG4849-RA	0.335756	12.1925	3.82301	0.000851299	0.0350028	-0.844929
60	13	0	CUST_31512_PI428323385	CG5247	Probe	117419	Irbp	Inverted repeat-binding protein	-0.403136	10.1473	-3.82137	0.000854798	0.0351125	-0.848865
296	8	0	CUST_18014_PI428323385	CG31332	Probe	41178	Unc-115b	CG31332 gene product from transcript CG31332-RD	-1.42154	10.5048	-3.81937	0.000859056	0.0352324	-0.853632
335	84	0	CUST_36629_PI428323385	CG7546	Probe	38844	CG7546	CG7546 gene product from transcript CG7546-RD	-0.363422	10.3113	-3.81921	0.000859387	0.0352324	-0.854002
145	153	0	CUST_13405_PI428323385	CG17888	Probe	45588	Pdp1	PAR-domain protein 1	-0.637543	8.42967	-3.81671	0.000864766	0.0354185	-0.859988
355	37	0	CUST_27706_PI428323385	CG42806	Probe	10178814	CG42806	CG42806 gene product from transcript CG42806-RB	-0.362557	12.6681	-3.81564	0.000867072	0.0354785	-0.862543
184	3	0	CUST_14418_PI428323385	CG18542	Probe	41176	CG18542	CG18542 gene product from transcript CG18542-RA	-0.43877	10.4143	-3.81307	0.000872625	0.0356711	-0.868668
366	11	0	CUST_21805_PI428323385	CG33483	Probe	2768693	CG33483	CG33483 gene product from transcript CG33483-RB	-0.541435	4.05935	-3.81233	0.000874236	0.0357023	-0.870437
371	33	0	CUST_3421_PI428323385	CG11516	Probe	43469	Ptp99A	Protein tyrosine phosphatase 99A	-0.455829	9.00874	-3.80791	0.000883888	0.0360616	-0.88097
190	149	0	CUST_14195_PI428323385	CG1840	Probe	32150	CG1840	CG1840 gene product from transcript CG1840-RA	0.424289	8.24794	3.80597	0.000888181	0.0362017	-0.885617
68	103	0	CUST_10212_PI428323385	CG15309	Probe	31949	CG15309	CG15309 gene product from transcript CG15309-RA	-0.433947	9.55087	-3.80452	0.00089138	0.0362971	-0.889065
115	35	0	CUST_14683_PI428323385	CG18787	Probe	59163	CG18787	CG18787 gene product from transcript CG18787-RA	-0.275144	8.98911	-3.8035	0.000893644	0.0363542	-0.891499
325	84	0	CUST_39958_PI428323385	CG9023	Probe	36236	Drip	CG9023 gene product from transcript CG9023-RA	0.372425	9.80559	3.80237	0.000896168	0.0364217	-0.894204
356	85	0	CUST_12449_PI428323385	CG17342	Probe	44672	Lk6	CG17342 gene product from transcript CG17342-RA	-0.45728	10.7952	-3.80003	0.000901389	0.0365987	-0.899775
187	6	0	CUST_19543_PI428323385	CG32172	Probe	43918	noe	CG32172 gene product from transcript CG32172-RC	-0.616734	10.4581	-3.79913	0.000903409	0.0366454	-0.901922
317	96	0	CUST_40128_PI428323385	CG9098	Probe	33840	CG9098	CG9098 gene product from transcript CG9098-RA	-0.592139	4.79004	-3.79368	0.000915737	0.0371098	-0.91492
50	5	0	CUST_12408_PI428323385	CG17321	Probe	35144	CG17321	CG17321 gene product from transcript CG17321-RA	0.491154	4.31898	3.79262	0.000918144	0.0371716	-0.917437
165	130	0	CUST_14291_PI428323385	CG18446	Probe	36023	CG18446	CG18446 gene product from transcript CG18446-RA	0.365462	4.85137	3.79145	0.000920821	0.0372443	-0.920229
234	53	0	CUST_37155_PI428323385	CG7824	Probe	43530	CG7824	CG7824 gene product from transcript CG7824-RC	0.295742	10.8662	3.78955	0.000925186	0.0373523	-0.924764
204	12	0	CUST_40393_PI428323385	CG9214	Probe	32574	Tob	CG9214 gene product from transcript CG9214-RA	-1.0909	5.78401	-3.78952	0.000925263	0.0373523	-0.924843
24	122	0	CUST_11483_PI428323385	CG16800	Probe	34693	CG16800	CG16800 gene product from transcript CG16800-RB	-0.484713	6.35483	-3.78723	0.000930533	0.0375291	-0.930288
355	40	0	CUST_27599_PI428323385	CG42774	Probe	10178960	pre-mod(mdg4)-AE	CG42774 gene product from transcript CG42774-RA	0.332518	9.35213	3.7859	0.000933615	0.0376175	-0.93346
255	62	0	CUST_13695_PI428323385	CG18069	Probe	43828	CaMKII	Calcium/calmodulin-dependent protein kinase II	-0.43912	11.0024	-3.78444	0.00093701	0.0377182	-0.936939
22	105	0	CUST_35730_PI428323385	CG7137	Probe	37204	CG7137	CG7137 gene product from transcript CG7137-RA	0.316875	11.3663	3.78393	0.000938199	0.0377301	-0.938155
147	20	0	CUST_12928_PI428323385	CG17686	Probe	43981	DIP1	DISCO Interacting Protein 1	-0.422407	10.2141	-3.78071	0.000945724	0.0379965	-0.945814
144	90	0	CUST_16152_PI428323385	CG2909	Probe	31958	CG2909	CG2909 gene product from transcript CG2909-RA	-0.700556	6.70216	-3.77952	0.00094853	0.038073	-0.948654
120	10	0	CUST_9279_PI428323385	CG14823	Probe	38772	CG14823	CG14823 gene product from transcript CG14823-RD	0.511918	5.19071	3.778	0.000952114	0.0381805	-0.95227
318	44	0	CUST_10204_PI428323385	CG15304	Probe	50417	Neb-cGP	CG15304 gene product from transcript CG15304-RA	0.366102	13.5138	3.7749	0.000959493	0.0384104	-0.95967
92	2	0	CUST_28348_PI428323385	CG4320	Probe	31543	raptor	CG4320 gene product from transcript CG4320-RA	0.465712	7.58576	3.77434	0.000960834	0.0384104	-0.961009
85	155	0	CUST_34776_PI428323385	CG6754	Probe	44259	nbs	CG6754 gene product from transcript CG6754-RD	-0.254799	11.083	-3.77412	0.00096134	0.0384104	-0.961514
38	110	0	CUST_15998_PI428323385	CG2791	Probe	40941	CD98hc	CD98 heavy chain	-0.255311	13.7475	-3.7738	0.000962105	0.0384104	-0.962275
26	31	0	CUST_35591_PI428323385	CG7097	Probe	37203	hppy	happyhour	-0.407092	8.01945	-3.77368	0.0009624	0.0384104	-0.96257
297	29	0	CUST_2147_PI428323385	CG10931	Probe	37024	CG10931	CG10931 gene product from transcript CG10931-RA	-0.547263	4.39758	-3.7712	0.000968345	0.0385532	-0.968472
49	107	0	CUST_1912_PI428323385	CG10833	Probe	33749	Cyp28d1	CG10833 gene product from transcript CG10833-RA	-0.620691	4.95524	-3.77118	0.000968403	0.0385532	-0.96853
379	101	0	CUST_10627_PI428323385	CG15579	Probe	50380	CG15579	CG15579 gene product from transcript CG15579-RA	0.393371	6.71685	3.77104	0.00096872	0.0385532	-0.968843
176	127	0	CUST_3124_PI428323385	CG11372	Probe	33162	galectin	CG11372 gene product from transcript CG11372-RD	-0.293272	11.3652	-3.77061	0.000969756	0.0385581	-0.969868
62	72	0	CUST_33478_PI428323385	CG6169	Probe	39722	Dcp2	Decapping protein 2	-0.541379	11.8415	-3.76942	0.000972643	0.0386261	-0.972717
1	42	0	CUST_4734_PI428323385	CG12210	Probe	36080	Syb	Synaptobrevin	-0.405963	8.42405	-3.76915	0.000973298	0.0386261	-0.973362
120	158	0	CUST_6546_PI428323385	CG13316	Probe	31331	Mnt	CG13316 gene product from transcript CG13316-RD	-0.904163	8.72426	-3.76855	0.000974743	0.0386471	-0.974784
82	147	0	CUST_9055_PI428323385	CG14696	Probe	41317	CG14696	CG14696 gene product from transcript CG14696-RA	0.625158	9.85487	3.76705	0.000978388	0.0387552	-0.978361
269	122	0	CUST_25380_PI428323385	CG41265	Probe	5740691	l(2)41Ab	lethal (2) 41Ab	-0.551759	6.50723	-3.7655	0.000982142	0.0388674	-0.982031
378	111	0	CUST_33128_PI428323385	CG6016	Probe	36496	bbc	bb in a boxcar	0.698385	8.3524	3.76419	0.000985353	0.0389579	-0.985159
252	54	0	CUST_2044_PI428323385	CG10882	Probe	33409	gho	ghost	0.325961	9.36185	3.76315	0.000987902	0.0390099	-0.987636
176	96	0	CUST_26849_PI428323385	CG42581	Probe	8673991	CG42581	CG42581 gene product from transcript CG42581-RA	-0.309458	4.30447	-3.76268	0.000989066	0.0390099	-0.988764
217	46	0	CUST_3634_PI428323385	CG11652	Probe	39317	CG11652	CG11652 gene product from transcript CG11652-RA	-0.631996	8.33109	-3.76211	0.000990458	0.0390099	-0.990112
105	59	0	CUST_36338_PI428323385	CG7421	Probe	40433	Nopp140	CG7421 gene product from transcript CG7421-RB	0.300739	9.01376	3.76198	0.000990767	0.0390099	-0.990411
327	66	0	CUST_33129_PI428323385	CG6016	Probe	36496	bbc	bb in a boxcar	0.3564	9.22887	3.76177	0.000991291	0.0390099	-0.990917
50	111	0	CUST_34864_PI428323385	CG6785	Probe	34620	CG6785	CG6785 gene product from transcript CG6785-RA	-0.443434	5.81607	-3.75639	0.00100462	0.0394976	-1.00372
358	24	0	CUST_834_PI428323385	CG10363	Probe	35248	TepIV	Thiolester containing protein IV	0.496702	12.2511	3.75479	0.00100861	0.0396176	-1.00752
46	99	0	CUST_35107_PI428323385	CG6898	Probe	41975	Zip3	Zinc/iron regulated transporter-related protein 3	0.354722	8.04714	3.75368	0.00101141	0.0396907	-1.01017
357	135	0	CUST_38252_PI428323385	CG8262	Probe	35878	ana2	anastral spindle 2	0.475714	10.6305	3.7467	0.00102907	0.0403461	-1.02675
113	61	0	CUST_16238_PI428323385	CG2957	Probe	40932	mRpS9	mitochondrial ribosomal protein S9	0.288565	10.864	3.74615	0.00103048	0.0403639	-1.02807
177	153	0	CUST_6843_PI428323385	CG13488	Probe	37496	CG13488	CG13488 gene product from transcript CG13488-RB	-0.519239	4.82551	-3.7453	0.00103266	0.0403766	-1.03009
346	164	0	CUST_35943_PI428323385	CG7228	Probe	34087	pes	peste	0.459421	6.62618	3.74528	0.00103272	0.0403766	-1.03015
303	9	0	CUST_1337_PI428323385	CG10605	Probe	39440	caup	caupolican	-0.472137	10.3493	-3.74263	0.00103952	0.0405744	-1.03643
281	152	0	CUST_30289_PI428323385	CG4694	Probe	34992	her	hermaphrodite	-0.403329	11.131	-3.74256	0.0010397	0.0405744	-1.0366
128	23	0	CUST_30663_PI428323385	CG4859	Probe	37949	Mmp1	Matrix metalloproteinase 1	-0.295742	9.33866	-3.74162	0.00104212	0.0405998	-1.03883
66	68	0	CUST_35777_PI428323385	CG7160	Probe	40408	Cpr78E	Cuticular protein 78E	1.47269	11.3126	3.74156	0.00104228	0.0405998	-1.03897
58	2	0	CUST_10882_PI428323385	CG1575	Probe	31731	CG1575	CG1575 gene product from transcript CG1575-RA	0.555564	10.5022	3.74013	0.001046	0.0407072	-1.04238
1	101	0	CUST_3415_PI428323385	CG11516	Probe	43469	Ptp99A	Protein tyrosine phosphatase 99A	-0.439892	9.10645	-3.73941	0.00104785	0.0407417	-1.04408
51	137	0	CUST_20908_PI428323385	CG32843	Probe	36475	Dh31-R1	Diuretic hormone 31 receptor 1	-0.284711	5.84428	-3.7366	0.00105519	0.0409355	-1.05076
39	155	0	CUST_20855_PI428323385	CG32809	Probe	31121	CG32809	CG32809 gene product from transcript CG32809-RG	-0.39592	6.94891	-3.73651	0.00105541	0.0409355	-1.05096
242	111	0	CUST_9063_PI428323385	CG14704	Probe	41379	PGRP-LB	Peptidoglycan recognition protein LB	-0.475568	5.108	-3.73639	0.00105575	0.0409355	-1.05127
208	111	0	CUST_19751_PI428323385	CG3228	Probe	31205	kz	kurz	0.429711	7.89329	3.734	0.00106201	0.0411405	-1.05693
98	115	0	CUST_32538_PI428323385	CG5731	Probe	34355	CG5731	CG5731 gene product from transcript CG5731-RA	0.383639	10.1039	3.73341	0.00106356	0.0411627	-1.05833
22	152	0	CUST_38153_PI428323385	CG8222	Probe	34127	Pvr	PDGF- and VEGF-receptor related	-0.343644	8.54149	-3.72955	0.0010738	0.0414902	-1.06751
273	75	0	CUST_20911_PI428323385	CG32843	Probe	36475	Dh31-R1	Diuretic hormone 31 receptor 1	-0.414859	5.89521	-3.72939	0.00107424	0.0414902	-1.06789
338	108	0	CUST_28776_PI428323385	CG43389	Probe	12798574	CG43389	CG43389 gene product from transcript CG43389-RA	0.418116	5.67613	3.72911	0.00107497	0.0414902	-1.06855
167	130	0	CUST_1338_PI428323385	CG10605	Probe	39440	caup	caupolican	-0.408943	10.2642	-3.72707	0.00108044	0.041663	-1.07341
83	152	0	CUST_20331_PI428323385	CG3254	Probe	33556	pgant2	polypeptide GalNAc transferase 2	0.330623	5.22536	3.72643	0.00108215	0.0416908	-1.07492
36	102	0	CUST_14322_PI428323385	CG18471	Probe	36862	gprs	CG18471 gene product from transcript CG18471-RA	0.355025	4.54212	3.72544	0.00108479	0.0416995	-1.07726
187	132	0	CUST_11502_PI428323385	CG16824	Probe	5740834	CG16824	CG16824 gene product from transcript CG16824-RA	0.453318	6.04876	3.7252	0.00108544	0.0416995	-1.07783
223	102	0	CUST_34301_PI428323385	CG6544	Probe	41291	fau	CG6544 gene product from transcript CG6544-RG	-1.26849	5.83677	-3.72504	0.00108588	0.0416995	-1.07822
15	6	0	CUST_257_PI428323385	CG10112	Probe	36613	Cpr51A	Cuticular protein 51A	0.845034	11.7013	3.72487	0.00108633	0.0416995	-1.07861
185	157	0	CUST_19164_PI428323385	CG32019	Probe	43814	bt	bent	-0.919072	5.26506	-3.72338	0.00109037	0.0418165	-1.08216
170	42	0	CUST_18233_PI428323385	CG31495	Probe	261626	CG31495	CG31495 gene product from transcript CG31495-RA	0.469562	9.18699	3.72282	0.00109188	0.0418365	-1.08349
56	72	0	CUST_3796_PI428323385	CG11759	Probe	32071	Kap3	Kinesin associated protein 3	0.433431	7.38262	3.72236	0.00109311	0.0418457	-1.08457
240	30	0	CUST_33157_PI428323385	CG6026	Probe	42287	CG6026	CG6026 gene product from transcript CG6026-RB	-0.591735	5.39115	-3.72033	0.00109864	0.0420192	-1.0894
340	43	0	CUST_27192_PI428323385	CG42673	Probe	39111	CG42673	CG42673 gene product from transcript CG42673-RD	-0.479095	7.11145	-3.71966	0.00110047	0.042051	-1.09099
189	117	0	CUST_20332_PI428323385	CG3254	Probe	33556	pgant2	polypeptide GalNAc transferase 2	0.435366	5.21861	3.71841	0.00110387	0.0421229	-1.09395
284	137	0	CUST_20841_PI428323385	CG32809	Probe	31121	CG32809	CG32809 gene product from transcript CG32809-RG	-0.762982	5.8073	-3.71823	0.00110437	0.0421229	-1.09438
363	37	0	CUST_3640_PI428323385	CG11655	Probe	32472	CG11655	CG11655 gene product from transcript CG11655-RA	0.529399	7.27374	3.71718	0.00110725	0.0421229	-1.09687
58	38	0	CUST_15660_PI428323385	CG2374	Probe	35623	lbm	late bloomer	-0.639961	7.98038	-3.71698	0.00110779	0.0421229	-1.09734
51	124	0	CUST_13708_PI428323385	CG18069	Probe	43828	CaMKII	Calcium/calmodulin-dependent protein kinase II	-0.429777	11.0995	-3.71687	0.00110809	0.0421229	-1.0976
111	72	0	CUST_28531_PI428323385	CG43293	Probe	12798363	CG43293	CG43293 gene product from transcript CG43293-RA	-0.42069	7.07042	-3.71678	0.00110834	0.0421229	-1.09782
274	50	0	CUST_25238_PI428323385	CG4070	Probe	32222	Tis11	Tis11 homolog	-0.680949	11.961	-3.71427	0.00111527	0.0423286	-1.10378
159	34	0	CUST_28093_PI428323385	CG43114	Probe	12798406	CG43114	CG43114 gene product from transcript CG43114-RA	0.953801	5.69294	3.71409	0.00111576	0.0423286	-1.1042
15	5	0	CUST_39030_PI428323385	CG8588	Probe	38818	pst	pastrel	-0.646296	10.5925	-3.71362	0.00111706	0.0423399	-1.10532
278	155	0	CUST_4065_PI428323385	CG11905	Probe	39895	CG11905	CG11905 gene product from transcript CG11905-RB	0.571359	7.09647	3.71027	0.00112636	0.042654	-1.11326
70	5	0	CUST_15759_PI428323385	CG2560	Probe	32198	Cpr11A	Cuticular protein 11A	-0.556964	5.70632	-3.70912	0.00112958	0.0427377	-1.11599
77	103	0	CUST_35645_PI428323385	CG7107	Probe	32314	up	upheld	-0.822062	5.1633	-3.70845	0.00113146	0.0427703	-1.11758
178	134	0	CUST_36217_PI428323385	CG7367	Probe	34094	CG7367	CG7367 gene product from transcript CG7367-RB	0.548045	5.9761	3.7072	0.00113496	0.0428644	-1.12054
249	146	0	CUST_39065_PI428323385	CG8604	Probe	36383	Amph	Amphiphysin	0.664357	5.98742	3.70617	0.00113788	0.0429363	-1.123
205	156	0	CUST_39492_PI428323385	CG8800	Probe	35962	CG8800	CG8800 gene product from transcript CG8800-RA	0.92977	7.04347	3.70421	0.00114342	0.0430685	-1.12765
123	112	0	CUST_25995_PI428323385	CG42311	Probe	37038	grh	grainy head	0.529325	13.0307	3.7037	0.00114485	0.0430685	-1.12884
210	122	0	CUST_40490_PI428323385	CG9252	Probe	35380	del	deadlock	-0.546382	9.15422	-3.70327	0.00114608	0.0430685	-1.12986
371	104	0	CUST_14855_PI428323385	CG1915	Probe	44013	sls	sallimus	-0.641754	5.18721	-3.7031	0.00114657	0.0430685	-1.13027
163	130	0	CUST_36213_PI428323385	CG7366	Probe	38918	CG7366	CG7366 gene product from transcript CG7366-RA	0.452995	4.74535	3.70306	0.00114668	0.0430685	-1.13037
21	18	0	CUST_18010_PI428323385	CG31332	Probe	41178	Unc-115b	CG31332 gene product from transcript CG31332-RD	-1.38496	10.5463	-3.70219	0.00114913	0.0430685	-1.13241
311	146	0	CUST_11923_PI428323385	CG17081	Probe	39647	Cep135	CG17081 gene product from transcript CG17081-RB	-0.589152	5.68887	-3.70215	0.00114924	0.0430685	-1.13251
300	65	0	CUST_3472_PI428323385	CG11537	Probe	38373	CG11537	CG11537 gene product from transcript CG11537-RB	0.329029	7.87776	3.70205	0.00114955	0.0430685	-1.13276
201	120	0	CUST_1206_PI428323385	CG1056	Probe	40575	5-HT2	Serotonin receptor 2	-0.583339	5.0257	-3.69919	0.00115771	0.0433134	-1.13953
114	5	0	CUST_25236_PI428323385	CG4070	Probe	32222	Tis11	Tis11 homolog	-0.657563	11.7771	-3.69904	0.00115815	0.0433134	-1.13989
22	35	0	CUST_41882_PI428323385	CG9899	Probe	37676	CG9899	CG9899 gene product from transcript CG9899-RA	0.61847	4.37824	3.69804	0.00116102	0.0433824	-1.14226
241	24	0	CUST_14567_PI428323385	CG18661	Probe	50438	CG18661	CG18661 gene product from transcript CG18661-RA	0.367112	10.1917	3.69678	0.00116464	0.0434793	-1.14524
328	47	0	CUST_20189_PI428323385	CG32491	Probe	49228	mod(mdg4)	modifier of mdg4	-0.328815	11.0934	-3.69582	0.00116742	0.0435444	-1.14752
213	7	0	CUST_12316_PI428323385	CG17264	Probe	33511	CG17264	CG17264 gene product from transcript CG17264-RA	0.460905	5.31893	3.6954	0.00116862	0.0435508	-1.14851
32	36	0	CUST_32067_PI428323385	CG5519	Probe	37123	Prp19	CG5519 gene product from transcript CG5519-RA	0.34718	12.6807	3.69457	0.00117104	0.0436001	-1.15049
54	77	0	CUST_3346_PI428323385	CG11486	Probe	38369	CG11486	CG11486 gene product from transcript CG11486-RG	-0.89892	11.7454	-3.69423	0.00117201	0.0436001	-1.15128
227	18	0	CUST_37004_PI428323385	CG7748	Probe	43005	OstStt3	Oligosaccharyl transferase 3	0.335223	14.5032	3.69311	0.00117528	0.043661	-1.15394
359	151	0	CUST_11846_PI428323385	CG17044	Probe	41652	yellow-e2	CG17044 gene product from transcript CG17044-RB	0.481139	10.5822	3.69296	0.00117572	0.043661	-1.1543
56	94	0	CUST_915_PI428323385	CG10399	Probe	33978	CG10399	CG10399 gene product from transcript CG10399-RA	-0.341829	10.4567	-3.69226	0.00117776	0.043694	-1.15596
201	58	0	CUST_30196_PI428323385	CG4650	Probe	34859	CG4650	CG4650 gene product from transcript CG4650-RB	-0.472021	4.56913	-3.69194	0.00117868	0.043694	-1.15671
229	118	0	CUST_4825_PI428323385	CG12256	Probe	41483	CG12256	CG12256 gene product from transcript CG12256-RA	0.422949	7.35381	3.69066	0.00118244	0.0437949	-1.15975
233	131	0	CUST_1025_PI428323385	CG10473	Probe	35173	Acn	Acinus	-0.34232	11.4455	-3.69021	0.00118375	0.0438003	-1.16081
184	160	0	CUST_40392_PI428323385	CG9214	Probe	32574	Tob	CG9214 gene product from transcript CG9214-RA	-1.05751	5.80276	-3.6899	0.00118466	0.0438003	-1.16155
375	76	0	CUST_14107_PI428323385	CG18335	Probe	36202	CG18335	CG18335 gene product from transcript CG18335-RA	0.491123	5.72839	3.68806	0.00119005	0.0439612	-1.16589
172	126	0	CUST_37423_PI428323385	CG7943	Probe	43574	CG7943	CG7943 gene product from transcript CG7943-RB	0.323146	9.31347	3.68715	0.00119274	0.044022	-1.16805
8	23	0	CUST_28990_PI428323385	CG43647	Probe	NA	NA	NA	-0.51893	5.4098	-3.68646	0.00119479	0.0440587	-1.16969
235	3	0	CUST_26996_PI428323385	CG42626	Probe	8673957	Mst36Fb	Male-specific transcript 36Fb	-0.601467	6.4314	-3.68528	0.0011983	0.0441497	-1.1725
178	54	0	CUST_25813_PI428323385	CG42268	Probe	39145	CG42268	CG42268 gene product from transcript CG42268-RD	-0.366198	9.46921	-3.68341	0.00120385	0.0442865	-1.17692
70	62	0	CUST_4352_PI428323385	CG12050	Probe	35374	CG12050	CG12050 gene product from transcript CG12050-RB	0.281388	8.47559	3.68332	0.00120411	0.0442865	-1.17713
289	83	0	CUST_14306_PI428323385	CG18466	Probe	47895	Nmdmc	NAD-dependent methylenetetrahydrofolate dehydrogenase	0.340382	11.6278	3.68231	0.00120712	0.0443585	-1.17952
303	36	0	CUST_21912_PI428323385	CG33521	Probe	3346141	CG33521	CG33521 gene product from transcript CG33521-RF	-0.850425	4.93237	-3.67633	0.00122511	0.0449804	-1.19367
127	117	0	CUST_19166_PI428323385	CG32019	Probe	43814	bt	bent	-0.793555	5.29522	-3.67581	0.0012267	0.0449995	-1.1949
101	2	0	CUST_15198_PI428323385	CG2086	Probe	38218	drpr	draper	-0.441106	5.51787	-3.67386	0.00123264	0.0451712	-1.19952
198	112	0	CUST_11120_PI428323385	CG15920	Probe	36880	resilin	CG15920 gene product from transcript CG15920-RA	0.308248	4.68459	3.67357	0.00123352	0.0451712	-1.20021
152	56	0	CUST_345_PI428323385	CG10151	Probe	36639	CG10151	CG10151 gene product from transcript CG10151-RA	-0.360046	7.4921	-3.67239	0.00123712	0.045243	-1.20299
243	147	0	CUST_29629_PI428323385	CG43946	Probe	NA	NA	NA	0.376681	8.7237	3.67223	0.00123762	0.045243	-1.20338
54	162	0	CUST_16353_PI428323385	CG30011	Probe	36064	gem	gemini	-0.415889	9.45609	-3.66909	0.00124727	0.0455562	-1.21081
94	52	0	CUST_5807_PI428323385	CG12895	Probe	36103	CG12895	CG12895 gene product from transcript CG12895-RA	0.355467	10.6022	3.66825	0.00124987	0.0456117	-1.2128
360	91	0	CUST_15643_PI428323385	CG2360	Probe	40825	Ccp84Aa	CG2360 gene product from transcript CG2360-RA	1.0173	7.48487	3.66776	0.00125139	0.0456274	-1.21396
25	155	0	CUST_9276_PI428323385	CG14821	Probe	38755	tow	target of wingless	-0.31585	5.63726	-3.66623	0.00125613	0.0457237	-1.21758
259	58	0	CUST_36625_PI428323385	CG7546	Probe	38844	CG7546	CG7546 gene product from transcript CG7546-RD	-0.390445	10.3531	-3.66621	0.00125619	0.0457237	-1.21762
17	98	0	CUST_17759_PI428323385	CG31174	Probe	318616	CG31174	CG31174 gene product from transcript CG31174-RA	-0.41092	5.71315	-3.66582	0.00125738	0.0457275	-1.21853
77	108	0	CUST_9750_PI428323385	CG1506	Probe	35419	Ac3	CG1506 gene product from transcript CG1506-RA	-0.46114	6.77906	-3.66169	0.0012703	0.0461576	-1.2283
255	105	0	CUST_27880_PI428323385	CG4300	Probe	39403	CG4300	CG4300 gene product from transcript CG4300-RB	-0.435769	5.28141	-3.6602	0.001275	0.0462833	-1.23183
383	49	0	CUST_36535_PI428323385	CG7510	Probe	39965	CG7510	CG7510 gene product from transcript CG7510-RA	0.376866	8.22384	3.65989	0.00127596	0.0462833	-1.23255
228	139	0	CUST_41868_PI428323385	CG9889	Probe	37703	yellow-d	CG9889 gene product from transcript CG9889-RA	0.432519	8.63364	3.65909	0.00127849	0.0463352	-1.23444
143	8	0	CUST_31157_PI428323385	CG5059	Probe	40278	CG5059	CG5059 gene product from transcript CG5059-RD	-0.374023	12.0627	-3.65819	0.00128134	0.0463988	-1.23658
66	90	0	CUST_1083_PI428323385	CG10497	Probe	37447	Sdc	Syndecan	-0.635208	11.7354	-3.65773	0.00128279	0.0464113	-1.23765
378	60	0	CUST_36335_PI428323385	CG7421	Probe	40433	Nopp140	CG7421 gene product from transcript CG7421-RB	0.445962	10.3862	3.65725	0.00128434	0.0464276	-1.23881
308	112	0	CUST_13410_PI428323385	CG17888	Probe	45588	Pdp1	PAR-domain protein 1	-0.630598	8.50435	-3.65615	0.00128783	0.046514	-1.24141
364	152	0	CUST_29994_PI428323385	CG4562	Probe	42362	CG4562	CG4562 gene product from transcript CG4562-RB	-0.605577	6.30509	-3.65551	0.00128985	0.046524	-1.24291
183	133	0	CUST_25985_PI428323385	CG42310	Probe	246493	prom	prominin	-0.354047	4.46636	-3.65537	0.00129031	0.046524	-1.24325
88	29	0	CUST_3341_PI428323385	CG11486	Probe	38369	CG11486	CG11486 gene product from transcript CG11486-RG	-0.888038	11.4329	-3.65261	0.00129914	0.0468023	-1.24976
250	69	0	CUST_28481_PI428323385	CG4326	Probe	37872	mRpS17	mitochondrial ribosomal protein S17	0.350438	10.0527	3.65155	0.00130254	0.0468476	-1.25226
324	161	0	CUST_18012_PI428323385	CG31332	Probe	41178	Unc-115b	CG31332 gene product from transcript CG31332-RD	-1.40658	10.5133	-3.65153	0.00130262	0.0468476	-1.25232
37	29	0	CUST_33617_PI428323385	CG6214	Probe	34686	MRP	Multidrug-Resistance like Protein 1	-0.438795	10.5658	-3.64748	0.00131571	0.0472533	-1.26188
250	124	0	CUST_40033_PI428323385	CG9059	Probe	32688	CG9059	CG9059 gene product from transcript CG9059-RD	-0.402512	5.23731	-3.64735	0.00131614	0.0472533	-1.26219
14	49	0	CUST_6541_PI428323385	CG13316	Probe	31331	Mnt	CG13316 gene product from transcript CG13316-RD	-0.933323	8.81574	-3.64629	0.00131958	0.0473365	-1.26468
208	58	0	CUST_5315_PI428323385	CG12559	Probe	3354888	rl	rolled	-0.453726	9.86167	-3.64492	0.00132408	0.0473664	-1.26794
19	155	0	CUST_37757_PI428323385	CG8083	Probe	35914	CG8083	CG8083 gene product from transcript CG8083-RA	0.603273	5.45779	3.64482	0.00132438	0.0473664	-1.26816
40	159	0	CUST_2627_PI428323385	CG11148	Probe	43842	CG11148	CG11148 gene product from transcript CG11148-RD	-0.461569	12.8718	-3.64472	0.00132471	0.0473664	-1.26839
171	146	0	CUST_7962_PI428323385	CG14121	Probe	39432	ver	verrocchio	-0.456982	10.575	-3.64463	0.00132503	0.0473664	-1.26862
285	104	0	CUST_28020_PI428323385	CG43079	Probe	40515	nrm	neuromusculin	0.541393	5.64242	3.64432	0.00132602	0.0473664	-1.26934
49	150	0	CUST_20726_PI428323385	CG32718	Probe	318168	CG32718	CG32718 gene product from transcript CG32718-RB	0.504331	4.46896	3.64211	0.0013333	0.0475859	-1.27457
183	138	0	CUST_2505_PI428323385	CG11100	Probe	40514	Mes2	CG11100 gene product from transcript CG11100-RB	0.444277	8.87562	3.64155	0.00133514	0.0476113	-1.27589
176	155	0	CUST_40234_PI428323385	CG9147	Probe	33855	CG9147	CG9147 gene product from transcript CG9147-RB	-0.470985	10.4829	-3.63954	0.00134178	0.0477743	-1.28063
75	99	0	CUST_14570_PI428323385	CG18661	Probe	50438	CG18661	CG18661 gene product from transcript CG18661-RA	0.367323	10.2473	3.63895	0.00134375	0.0477743	-1.28203
48	154	0	CUST_4865_PI428323385	CG12283	Probe	34688	kek1	kekkon-1	-0.413951	10.0245	-3.63879	0.00134427	0.0477743	-1.2824
15	3	0	CUST_1061_PI428323385	CG10491	Probe	38657	vn	vein	-0.490171	9.88948	-3.63854	0.00134509	0.0477743	-1.28298
226	25	0	CUST_16158_PI428323385	CG2913	Probe	31340	yin	CG2913 gene product from transcript CG2913-RA	0.395541	6.60828	3.63846	0.00134537	0.0477743	-1.28318
132	126	0	CUST_654_PI428323385	CG1028	Probe	40835	Antp	Antennapedia	-0.454168	10.1213	-3.63695	0.00135039	0.0478808	-1.28674
46	88	0	CUST_15051_PI428323385	CG2013	Probe	40610	UbcD6	Ubiquitin conjugating enzyme	-0.267006	11.1293	-3.63687	0.00135064	0.0478808	-1.28692
66	73	0	CUST_39696_PI428323385	CG8891	Probe	33718	CG8891	CG8891 gene product from transcript CG8891-RA	-0.413447	11.6074	-3.63599	0.00135361	0.0479456	-1.28901
276	89	0	CUST_2725_PI428323385	CG11188	Probe	33943	CG11188	CG11188 gene product from transcript CG11188-RA	0.303707	10.06	3.63521	0.00135621	0.0479976	-1.29085
341	116	0	CUST_6542_PI428323385	CG13316	Probe	31331	Mnt	CG13316 gene product from transcript CG13316-RD	-0.945589	8.72458	-3.63382	0.00136088	0.048108	-1.29413
301	138	0	CUST_9561_PI428323385	CG14985	Probe	38470	CG14985	CG14985 gene product from transcript CG14985-RB	0.348949	10.4589	3.6336	0.00136161	0.048108	-1.29465
284	6	0	CUST_3930_PI428323385	CG11833	Probe	43424	Ssl2	Strictosidine synthase-like 2	-0.558179	5.36641	-3.63279	0.00136435	0.0481645	-1.29657
265	153	0	CUST_37758_PI428323385	CG8083	Probe	35914	CG8083	CG8083 gene product from transcript CG8083-RA	0.515588	5.54703	3.63043	0.0013723	0.0484045	-1.30212
52	154	0	CUST_540_PI428323385	CG10238	Probe	43017	Mocs2	Molybdopterin synthase 2	0.4246	9.44441	3.62956	0.00137527	0.0484689	-1.30418
64	97	0	CUST_33027_PI428323385	CG5961	Probe	41541	CG5961	CG5961 gene product from transcript CG5961-RB	0.51971	6.95222	3.62917	0.00137657	0.0484742	-1.30509
192	160	0	CUST_13018_PI428323385	CG17725	Probe	37131	Pepck	Phosphoenolpyruvate carboxykinase	-0.779995	9.02499	-3.62876	0.00137799	0.0484836	-1.30607
113	63	0	CUST_23047_PI428323385	CG3423	Probe	33974	SA	Stromalin	-0.273788	11.3238	-3.62787	0.00138102	0.0485498	-1.30817
243	127	0	CUST_12452_PI428323385	CG17342	Probe	44672	Lk6	CG17342 gene product from transcript CG17342-RA	-0.394195	10.5725	-3.6266	0.00138536	0.0486202	-1.31117
6	108	0	CUST_16898_PI428323385	CG3036	Probe	33695	CG3036	CG3036 gene product from transcript CG3036-RA	-0.521355	7.56093	-3.62629	0.0013864	0.0486202	-1.31188
3	110	0	CUST_19989_PI428323385	CG32438	Probe	326215	Smc5	CG32438 gene product from transcript CG32438-RE	-0.414883	11.4025	-3.62627	0.00138648	0.0486202	-1.31194
335	162	0	CUST_2120_PI428323385	CG10916	Probe	37081	CG10916	CG10916 gene product from transcript CG10916-RA	-0.459652	7.54881	-3.6219	0.00140151	0.049059	-1.32224
309	105	0	CUST_22194_PI428323385	CG33694	Probe	3771934	cana	CENP-ana	-0.352449	8.47203	-3.62168	0.00140229	0.049059	-1.32277
93	22	0	CUST_2883_PI428323385	CG11278	Probe	39485	Syx13	Syntaxin 13	0.250331	10.8929	3.62162	0.00140248	0.049059	-1.3229
267	75	0	CUST_17249_PI428323385	CG3074	Probe	37537	CG3074	CG3074 gene product from transcript CG3074-RB	-0.790349	7.29665	-3.61702	0.00141851	0.0495784	-1.33375
181	147	0	CUST_40651_PI428323385	CG9328	Probe	35344	CG9328	CG9328 gene product from transcript CG9328-RB	-0.504237	9.87756	-3.61633	0.0014209	0.049621	-1.33536
383	83	0	CUST_41745_PI428323385	CG9821	Probe	41058	CG9821	CG9821 gene product from transcript CG9821-RB	-0.731226	11.9226	-3.61516	0.00142501	0.0496753	-1.33812
190	147	0	CUST_17121_PI428323385	CG30464	Probe	36716	Ir52d	Ionotropic receptor 52d	0.336854	4.35808	3.61516	0.00142501	0.0496753	-1.33812
34	97	0	CUST_8940_PI428323385	CG1464	Probe	43812	ey	eyeless	-0.423103	5.3943	-3.61488	0.00142599	0.0496753	-1.33878
83	143	0	CUST_36319_PI428323385	CG7414	Probe	40431	CG7414	CG7414 gene product from transcript CG7414-RC	-0.389231	9.30096	-3.61392	0.00142938	0.0497524	-1.34104
134	114	0	CUST_33608_PI428323385	CG6213	Probe	42341	Vha13	Vacuolar H[+] ATPase G-subunit	0.275647	13.9276	3.613	0.00143264	0.0497941	-1.34322
298	17	0	CUST_15997_PI428323385	CG2791	Probe	40941	CD98hc	CD98 heavy chain	-0.248563	13.7124	-3.61251	0.00143435	0.0497941	-1.34436
40	70	0	CUST_12872_PI428323385	CG17657	Probe	33349	frtz	fritz	0.268532	9.79142	3.61251	0.00143436	0.0497941	-1.34437
82	161	0	CUST_37437_PI428323385	CG7950	Probe	43579	CG7950	CG7950 gene product from transcript CG7950-RB	0.416649	10.472	3.61217	0.00143556	0.0497941	-1.34516
372	134	0	CUST_25151_PI428323385	CG40452	Probe	3355084	Snap25	Synapse protein 25	-0.613717	5.13383	-3.61191	0.00143648	0.0497941	-1.34578

## Sheet: Genes 24h
SystematicName	Symbol	Genename	logFC	AveExpr	t	P.Value	adj.P.Val	B
CG15784	CG15784	CG15784 gene product from transcript CG15784-RA	-3.31471	8.78475	-14.0455	6.75693e-13	9.87295e-10	19.1284
CG42644	CG42644	CG42644 gene product from transcript CG42644-RA	-3.22848	5.14214	-28.0397	1.60534e-19	6.7723e-15	31.1475
CG4594	CG4594	CG4594 gene product from transcript CG4594-RA	-2.96185	8.21672	-16.1927	3.26201e-14	7.32945e-11	21.7876
CG5096	CG5096	CG5096 gene product from transcript CG5096-RA	-2.19136	6.73261	-11.7863	2.5103e-11	2.20624e-08	15.8361
CG11584	CG11584	CG11584 gene product from transcript CG11584-RB	-2.1753	6.7413	-17.0131	1.11895e-14	3.37173e-11	22.7003
CG43144	CG43144	CG43144 gene product from transcript CG43144-RB	-1.83713	8.5435	-14.921	1.88108e-13	3.45022e-10	20.2629
CG15892	CG15892	CG15892 gene product from transcript CG15892-RB	-1.79796	6.12757	-18.8322	1.21242e-15	6.3094e-12	24.5468
CG6912	CG6912	CG6912 gene product from transcript CG6912-RA	-1.7639	9.93502	-9.38601	2.1107e-09	1.06002e-06	11.6646
CG5229	chm	chameau	-1.75309	6.31206	-8.46379	1.39848e-08	5.37975e-06	9.85151
CG12224	CG12224	CG12224 gene product from transcript CG12224-RB	-1.73045	8.99589	-9.6249	1.3166e-09	7.21327e-07	12.1145
CG3081	CG3081	CG3081 gene product from transcript CG3081-RA	-1.66877	6.07874	-8.43244	1.49425e-08	5.67895e-06	9.78772
CG11086	Gadd45	CG11086 gene product from transcript CG11086-RA	-1.63283	8.30806	-12.6156	6.29196e-12	6.98507e-09	17.1099
CG32475	mthl8	methuselah-like 8	-1.56877	7.48996	-11.4059	4.84941e-11	3.93418e-08	15.2246
CG18188	Damm	Death associated molecule related to Mch2	-1.55528	6.08998	-10.5344	2.32844e-10	1.61029e-07	13.7552
CG3397	CG3397	CG3397 gene product from transcript CG3397-RA	-1.4838	8.35543	-9.39325	2.08051e-09	1.05745e-06	11.6784
CG17533	GstE8	Glutathione S transferase E8	-1.46944	8.6557	-9.17601	3.21522e-09	1.50708e-06	11.2625
CG18522	CG18522	CG18522 gene product from transcript CG18522-RA	-1.46182	6.47912	-6.07345	3.15857e-06	0.00052254	4.59031
CG31332	Unc-115b	CG31332 gene product from transcript CG31332-RD	-1.42154	10.5048	-3.81937	0.000859056	0.0352324	-0.853632
CG17530	GstE6	Glutathione S transferase E6	-1.36529	8.94386	-7.25687	1.96879e-07	5.03367e-05	7.29288
CG5022	CG5022	CG5022 gene product from transcript CG5022-RA	-1.31594	7.7234	-7.69099	7.43689e-08	2.29002e-05	8.23731
CG7178	wupA	wings up A	-1.31283	5.24831	-4.10369	0.000422183	0.0216143	-0.170198
CG43676	NA	NA	-1.3054	4.7585	-10.9405	1.10908e-10	8.50683e-08	14.4519
CG13937	CG13937	CG13937 gene product from transcript CG13937-RD	-1.27704	6.48493	-7.65087	8.1286e-08	2.44938e-05	8.15115
CG6544	fau	CG6544 gene product from transcript CG6544-RG	-1.26849	5.83677	-3.72504	0.00108588	0.0416995	-1.07822
CG8663	nrv3	nervana 3	-1.25816	4.98534	-5.34237	1.89391e-05	0.00213273	2.84344
CG32581	CG32581	CG32581 gene product from transcript CG32581-RB	-1.24673	8.87222	-6.88486	4.62403e-07	0.000104707	6.4627
CG6665	CG6665	CG6665 gene product from transcript CG6665-RA	-1.23195	8.4271	-11.6098	3.40062e-11	2.86917e-08	15.5546
CG43646	NA	NA	-1.22389	5.50801	-7.82139	5.57835e-08	1.78529e-05	8.51576
CG7590	scyl	scylla	-1.21662	14.3961	-4.43831	0.000182155	0.0116607	0.642406
CG6658	Ugt86Di	CG6658 gene product from transcript CG6658-RA	-1.20766	10.07	-10.6175	1.99738e-10	1.47827e-07	13.8996
CG18455	Optix	CG18455 gene product from transcript CG18455-RA	-1.19944	6.134	-9.59318	1.40116e-09	7.57814e-07	12.0552
CG17803	CG17803	CG17803 gene product from transcript CG17803-RA	-1.18746	7.40499	-7.0538	3.13083e-07	7.46198e-05	6.84205
CG32019	bt	bent	-1.1812	5.75668	-4.86021	6.3097e-05	0.00526766	1.67159
CG9214	Tob	CG9214 gene product from transcript CG9214-RA	-1.16278	5.69995	-4.53495	0.000142852	0.00979158	0.877991
CG7035	Cbp80	cap binding protein 80	-1.13443	10.8557	-9.90155	7.69069e-10	4.70202e-07	12.6255
CG33653	Caps	Calcium activated protein for secretion	-1.13292	6.4832	-6.66021	7.80973e-07	0.000164731	5.95244
CG6794	Dif	Dorsal-related immunity factor	-1.12354	7.63123	-6.21849	2.2279e-06	0.000399942	4.93073
CG2184	Mlc2	Myosin light chain 2	-1.11855	10.771	-4.64845	0.000107384	0.00783459	1.15492
CG3568	CG3568	CG3568 gene product from transcript CG3568-RA	-1.09651	8.05318	-6.76184	6.15628e-07	0.000132505	6.18411
CG16857	CG16857	CG16857 gene product from transcript CG16857-RA	-1.09034	7.05567	-5.19542	2.72914e-05	0.00280125	2.48741
CG13679	CG13679	CG13679 gene product from transcript CG13679-RA	-1.07716	6.59297	-4.97745	4.70362e-05	0.00420442	1.95736
CG4920	ea	easter	-1.07407	10.8905	-6.778	5.92856e-07	0.000128257	6.22081
CG12367	Hen1	CG12367 gene product from transcript CG12367-RA	-1.07139	6.11424	-9.33881	2.31897e-09	1.12446e-06	11.5748
CG1221	miple	CG1221 gene product from transcript CG1221-RA	-1.0372	11.6595	-11.3612	5.24525e-11	4.17502e-08	15.1516
CG34002	CG34002	CG34002 gene product from transcript CG34002-RB	-1.03571	6.6302	-3.97927	0.000576491	0.0268067	-0.470327
CG8573	su(Hw)	suppressor of Hairy wing	-1.03237	11.1248	-12.0238	1.67681e-11	1.5831e-08	16.2092
CG30059	CG30059	CG30059 gene product from transcript CG30059-RA	-1.00558	10.3457	-7.67267	7.74485e-08	2.35053e-05	8.198
CG18278	CG18278	CG18278 gene product from transcript CG18278-RA	-0.995614	10.3972	-8.15595	2.69527e-08	9.88718e-06	9.2189
CG8799	l(2)03659	lethal (2) 03659	-0.992118	6.65875	-6.46399	1.24061e-06	0.000243426	5.5015
CG1058	rpk	ripped pocket	-0.985797	8.19835	-5.98496	3.91263e-06	0.000611327	4.38148
CG15400	CG15400	CG15400 gene product from transcript CG15400-RB	-0.983499	7.01401	-7.13442	2.60257e-07	6.30989e-05	7.02171
CG42516	CG42516	CG42516 gene product from transcript CG42516-RB	-0.971596	6.19547	-6.63393	8.30688e-07	0.000174345	5.89233
CG1851	Ady43A	CG1851 gene product from transcript CG1851-RA	-0.96701	9.8512	-10.5052	2.45819e-10	1.6726e-07	13.7041
CG11897	CG11897	CG11897 gene product from transcript CG11897-RA	-0.950916	7.94759	-4.87743	6.04306e-05	0.00507834	1.71358
CG43674	NA	NA	-0.948355	12.0942	-4.10685	0.000418858	0.0215225	-0.162573
CG1702	CG1702	CG1702 gene product from transcript CG1702-RB	-0.92499	10.8975	-7.49099	1.161e-07	3.24359e-05	7.80554
CG2924	CG2924	CG2924 gene product from transcript CG2924-RA	-0.922834	8.26905	-6.91094	4.35278e-07	9.92576e-05	6.52153
CG8620	CG8620	CG8620 gene product from transcript CG8620-RA	-0.918937	5.24726	-5.73442	7.20396e-06	0.000983515	3.78603
CG40300	2003-08-01	Argonaute 3	-0.916469	6.95715	-6.22643	2.18588e-06	0.000394075	4.9493
CG33198	pen-2	presenilin enhancer	-0.911267	9.51205	-6.85365	4.97136e-07	0.000109802	6.39222
CG4174	CG4174	CG4174 gene product from transcript CG4174-RB	-0.90631	5.26999	-7.97822	3.95924e-08	1.40357e-05	8.84739
CG13316	Mnt	CG13316 gene product from transcript CG13316-RD	-0.904163	8.72426	-3.76855	0.000974743	0.0386471	-0.974784
CG11486	CG11486	CG11486 gene product from transcript CG11486-RG	-0.903508	11.6012	-3.84397	0.000808035	0.0337837	-0.794872
CG7173	CG7173	CG7173 gene product from transcript CG7173-RA	-0.899574	9.36902	-7.95161	4.19545e-08	1.43894e-05	8.79136
CG9841	EfSec	CG9841 gene product from transcript CG9841-RA	-0.88429	7.90753	-6.98127	3.6998e-07	8.52895e-05	6.67966
CG14183	CG14183	CG14183 gene product from transcript CG14183-RA	-0.871848	6.49535	-5.23439	2.47681e-05	0.0026107	2.58193
CG7787	CG7787	CG7787 gene product from transcript CG7787-RA	-0.859176	8.04378	-5.703	7.78042e-06	0.0010474	3.71095
CG4757	CG4757	CG4757 gene product from transcript CG4757-RA	-0.855653	4.61267	-4.95238	5.0083e-05	0.00441086	1.89629
CG30323	CG30323	CG30323 gene product from transcript CG30323-RB	-0.851743	4.83606	-6.98694	3.65167e-07	8.47924e-05	6.69239
CG13258	CG13258	CG13258 gene product from transcript CG13258-RA	-0.844483	7.06782	-5.30085	2.09957e-05	0.00230657	2.74296
CG15444	ine	inebriated	-0.844221	5.42652	-7.21702	2.1555e-07	5.39556e-05	7.20487
CG7107	up	upheld	-0.837192	5.08668	-3.96578	0.000596266	0.027401	-0.502783
CG6785	CG6785	CG6785 gene product from transcript CG6785-RA	-0.830726	6.87151	-6.55833	9.92541e-07	0.000203259	5.7189
CG2759	w	white	-0.82649	9.21919	-5.32732	1.966e-05	0.00218833	2.80702
CG10460	cer	crammer	-0.820618	11.5904	-5.99957	3.7765e-06	0.000594461	4.41602
CG33105	p24-2	p24-related-2	-0.808774	6.77925	-5.22342	2.54539e-05	0.00266451	2.55532
CG14502	CG14502	CG14502 gene product from transcript CG14502-RC	-0.804625	5.08338	-5.84682	5.47399e-06	0.000807433	4.05392
CG13488	CG13488	CG13488 gene product from transcript CG13488-RB	-0.799737	4.95817	-5.69492	7.93594e-06	0.00106281	3.69164
CG4562	CG4562	CG4562 gene product from transcript CG4562-RB	-0.796637	7.98563	-7.13961	2.57184e-07	6.27143e-05	7.03325
CG3074	CG3074	CG3074 gene product from transcript CG3074-RB	-0.790349	7.29665	-3.61702	0.00141851	0.0495784	-1.33375
CG31006	stops	slow termination of phototransduction	-0.785842	6.03369	-6.88324	4.64138e-07	0.000104707	6.45906
CG5149	CG5149	CG5149 gene product from transcript CG5149-RA	-0.784816	9.8092	-5.20086	2.69246e-05	0.00277712	2.50059
CG17725	Pepck	Phosphoenolpyruvate carboxykinase	-0.779995	9.02499	-3.62876	0.00137799	0.0484836	-1.30607
CG13380	CG13380	CG13380 gene product from transcript CG13380-RB	-0.778817	5.40117	-6.21156	2.26526e-06	0.000404926	4.91452
CG7154	CG7154	CG7154 gene product from transcript CG7154-RA	-0.778374	8.97133	-6.42319	1.36674e-06	0.000265702	5.40713
CG8833	CG8833	CG8833 gene product from transcript CG8833-RA	-0.773581	8.21674	-4.66397	0.000103277	0.00761682	1.19278
CG10833	Cyp28d1	CG10833 gene product from transcript CG10833-RA	-0.771235	5.07304	-4.28437	0.000268247	0.015523	0.267789
CG9480	Glycogenin	CG9480 gene product from transcript CG9480-RB	-0.769884	9.21659	-4.23111	0.000306652	0.0169769	0.138451
CG9733	CG9733	CG9733 gene product from transcript CG9733-RA	-0.759336	7.92228	-8.89492	5.69829e-09	2.47823e-06	10.7144
CG31875	CG31875	CG31875 gene product from transcript CG31875-RD	-0.750745	7.25843	-5.80315	6.08949e-06	0.000864953	3.94998
CG32625	CG32625	CG32625 gene product from transcript CG32625-RA	-0.749833	6.25207	-3.99352	0.000556316	0.0261345	-0.436039
CG6311	Edc3	Enhancer of decapping 3	-0.746998	10.3153	-4.97422	4.74179e-05	0.00422911	1.9495
CG30101	CG30101	CG30101 gene product from transcript CG30101-RA	-0.745516	5.36883	-4.79251	7.47785e-05	0.00602024	1.50646
CG9059	CG9059	CG9059 gene product from transcript CG9059-RD	-0.739513	5.00897	-4.31208	0.000250198	0.0147555	0.335154
CG32788	Crg-1	Circadianly Regulated Gene	-0.735512	5.64397	-4.36129	0.000221085	0.0135322	0.454849
CG10021	bowl	brother of odd with entrails limited	-0.7341	9.44269	-5.49233	1.30657e-05	0.00161167	3.20537
CG9821	CG9821	CG9821 gene product from transcript CG9821-RB	-0.731226	11.9226	-3.61516	0.00142501	0.0496753	-1.33812
CG12177	CG12177	CG12177 gene product from transcript CG12177-RA	-0.718093	7.79899	-4.55592	0.000135513	0.0093717	0.929148
CG17975	sut2	sugar transporter 2	-0.710409	5.08666	-5.65717	8.70632e-06	0.00114419	3.60127
CG11155	CG11155	CG11155 gene product from transcript CG11155-RA	-0.708998	6.3459	-5.35262	1.84636e-05	0.00211086	2.86822
CG33048	Mocs1	Molybdenum cofactor synthesis 1 ortholog	-0.70164	6.80562	-5.50247	1.27428e-05	0.00157645	3.22977
CG17686	DIP1	DISCO Interacting Protein 1	-0.701555	10.0089	-5.09353	3.51878e-05	0.00336606	2.23989
CG31728	CG31728	CG31728 gene product from transcript CG31728-RC	-0.69574	12.2854	-5.17157	2.89627e-05	0.00290219	2.42951
CG8588	pst	pastrel	-0.695139	10.8618	-4.39673	0.000202233	0.0126955	0.541136
CG43374	Cht6	CG43374 gene product from transcript CG43374-RC	-0.694584	9.60233	-3.85932	0.00077772	0.0328747	-0.758159
CG8493	Den1	Deneddylase 1	-0.689472	10.7497	-6.33197	1.69824e-06	0.000318409	5.19543
CG10638	CG10638	CG10638 gene product from transcript CG10638-RA	-0.689241	8.09832	-5.34196	1.89583e-05	0.00213273	2.84245
CG32809	CG32809	CG32809 gene product from transcript CG32809-RG	-0.685174	6.9467	-6.25717	2.03069e-06	0.000370851	5.02111
CG7314	Bmcp	CG7314 gene product from transcript CG7314-RB	-0.681209	7.32223	-4.91806	5.45795e-05	0.0047279	1.81264
CG12199	kek5	kekkon5	-0.681058	9.7207	-7.96446	4.07968e-08	1.42095e-05	8.81841
CG4070	Tis11	Tis11 homolog	-0.680949	11.961	-3.71427	0.00111527	0.0423286	-1.10378
CG17888	Pdp1	PAR-domain protein 1	-0.680285	8.55813	-3.98028	0.000575031	0.0267751	-0.467887
CG32172	noe	CG32172 gene product from transcript CG32172-RC	-0.677818	10.6578	-5.02172	4.21043e-05	0.00387537	2.06517
CG10339	CG10339	CG10339 gene product from transcript CG10339-RA	-0.673933	5.65755	-5.72148	7.43585e-06	0.0010119	3.75513
CG18543	mtrm	matrimony	-0.672099	6.18051	-6.73723	6.52064e-07	0.000138929	6.12812
CG33521	CG33521	CG33521 gene product from transcript CG33521-RF	-0.670731	5.00306	-5.33233	1.94171e-05	0.00216701	2.81914
CG2086	drpr	draper	-0.666771	5.54062	-6.09411	3.00496e-06	0.000505049	4.63893
CG15529	CG15529	CG15529 gene product from transcript CG15529-RA	-0.664561	7.61164	-4.51629	0.000149715	0.0101054	0.832493
CG1915	sls	sallimus	-0.664291	5.28858	-4.73542	8.63037e-05	0.00668038	1.36716
CG6084	CG6084	CG6084 gene product from transcript CG6084-RB	-0.663581	11.8177	-7.68306	7.56857e-08	2.31368e-05	8.22031
CG3448	CG3448	CG3448 gene product from transcript CG3448-RB	-0.661624	9.3456	-5.86472	5.24033e-06	0.00078672	4.09648
CG5966	CG5966	CG5966 gene product from transcript CG5966-RA	-0.659197	6.68037	-4.26269	0.000283264	0.015997	0.215123
CG4128	nAcRalpha-30D	nicotinic Acetylcholine Receptor alpha 30D	-0.658106	4.78481	-6.00955	3.68635e-06	0.000585788	4.43959
CG9252	del	deadlock	-0.652026	9.83269	-4.68838	9.71309e-05	0.00733017	1.25236
CG31641	stai	stathmin	-0.651271	5.48734	-5.75595	6.83405e-06	0.000946348	3.83745
CG12947	CG12947	CG12947 gene product from transcript CG12947-RB	-0.648513	6.60268	-5.1538	3.02745e-05	0.00299803	2.38636
CG1435	CBP	sarcoplasmic calcium-binding protein	-0.639979	13.1156	-6.57871	9.45975e-07	0.000195622	5.76572
CG2374	lbm	late bloomer	-0.639961	7.98038	-3.71698	0.00110779	0.0421229	-1.09734
CG5953	CG5953	CG5953 gene product from transcript CG5953-RA	-0.639266	4.98345	-7.0003	3.541e-07	8.34466e-05	6.72233
CG6530	mthl3	methuselah-like 3	-0.638497	11.171	-5.29466	2.13207e-05	0.00233014	2.72799
CG6654	CG6654	CG6654 gene product from transcript CG6654-RA	-0.63733	8.00749	-5.82654	5.75156e-06	0.000839569	4.00567
CG11652	CG11652	CG11652 gene product from transcript CG11652-RA	-0.631996	8.33109	-3.76211	0.000990458	0.0390099	-0.990112
CG3409	CG3409	CG3409 gene product from transcript CG3409-RB	-0.631143	8.04743	-5.39753	1.65184e-05	0.00195195	2.97675
CG17472	CG17472	CG17472 gene product from transcript CG17472-RA	-0.628287	4.53791	-4.60161	0.000120805	0.0085652	1.04061
CG30457	CG30457	CG30457 gene product from transcript CG30457-RA	-0.621383	6.17462	-5.02879	4.13671e-05	0.003827	2.08237
CG5653	CG5653	CG5653 gene product from transcript CG5653-RA	-0.619946	4.48141	-3.87676	0.000744632	0.0319671	-0.716405
CG34057	CG34057	CG34057 gene product from transcript CG34057-RA	-0.618523	5.72527	-5.81309	5.94347e-06	0.000855738	3.97365
CG3280	CG3280	CG3280 gene product from transcript CG3280-RD	-0.61799	7.43857	-4.11873	0.000406561	0.0210444	-0.13383
CG15661	CG15661	CG15661 gene product from transcript CG15661-RA	-0.616588	6.26235	-5.90152	4.79135e-06	0.000732348	4.18385
CG10497	Sdc	Syndecan	-0.615995	11.5197	-5.10696	3.40278e-05	0.00327739	2.27253
CG9328	CG9328	CG9328 gene product from transcript CG9328-RB	-0.615518	9.61848	-4.39248	0.000204407	0.012813	0.530779
CG40452	Snap25	Synapse protein 25	-0.613717	5.13383	-3.61191	0.00143648	0.0497941	-1.34578
CG43897	NA	NA	-0.611612	8.09794	-3.8321	0.000832266	0.0344216	-0.823231
CG3619	Dl	Delta	-0.610019	11.2178	-4.46075	0.00017216	0.0111907	0.697086
CG41265	l(2)41Ab	lethal (2) 41Ab	-0.608177	6.49861	-3.93354	0.000646271	0.0290787	-0.580245
CG31057	tau	CG31057 gene product from transcript CG31057-RA	-0.604965	5.27808	-3.8496	0.000796783	0.0334792	-0.781409
CG13062	CG13062	CG13062 gene product from transcript CG13062-RB	-0.604439	5.68957	-5.35702	1.82631e-05	0.0020936	2.87887
CG14704	PGRP-LB	Peptidoglycan recognition protein LB	-0.604289	5.05138	-4.80538	7.24012e-05	0.00586241	1.53786
CG42626	Mst36Fb	Male-specific transcript 36Fb	-0.601467	6.4314	-3.68528	0.0011983	0.0441497	-1.1725
CG9098	CG9098	CG9098 gene product from transcript CG9098-RA	-0.592139	4.79004	-3.79368	0.000915737	0.0371098	-0.91492
CG6026	CG6026	CG6026 gene product from transcript CG6026-RB	-0.591735	5.39115	-3.72033	0.00109864	0.0420192	-1.0894
CG6831	rhea	CG6831 gene product from transcript CG6831-RB	-0.591617	5.46952	-6.80059	5.62441e-07	0.000122939	6.27208
CG17081	Cep135	CG17081 gene product from transcript CG17081-RB	-0.589152	5.68887	-3.70215	0.00114925	0.0430685	-1.13251
CG40218	Yeti	CG40218 gene product from transcript CG40218-RA	-0.586274	13.3569	-7.85761	5.15226e-08	1.69807e-05	8.59265
CG17834	CG17834	CG17834 gene product from transcript CG17834-RA	-0.585294	8.10221	-3.96651	0.000595181	0.0273809	-0.50103
CG1056	5-HT2	Serotonin receptor 2	-0.583339	5.0257	-3.69919	0.00115771	0.0433134	-1.13953
CG13436	CG13436	CG13436 gene product from transcript CG13436-RA	-0.578111	6.98066	-4.65383	0.000105943	0.00775925	1.16803
CG9003	CG9003	CG9003 gene product from transcript CG9003-RD	-0.576446	6.5896	-3.83686	0.000822462	0.0342174	-0.811858
CG34383	CG34383	CG34383 gene product from transcript CG34383-RE	-0.575621	8.85806	-4.64299	0.000108869	0.00787778	1.14158
CG43647	NA	NA	-0.574293	4.98083	-5.11903	3.30176e-05	0.00319644	2.30188
CG6122	piwi	CG6122 gene product from transcript CG6122-RA	-0.571697	6.49223	-4.09044	0.000436449	0.0221033	-0.202244
CG13041	CG13041	CG13041 gene product from transcript CG13041-RA	-0.569916	8.93245	-3.97515	0.000582462	0.0270019	-0.480243
CG32549	CG32549	CG32549 gene product from transcript CG32549-RD	-0.568512	5.46571	-4.46209	0.000171579	0.0111752	0.70036
CG2909	CG2909	CG2909 gene product from transcript CG2909-RA	-0.568061	6.75237	-4.28303	0.000269151	0.0155296	0.264533
CG7900	CG7900	CG7900 gene product from transcript CG7900-RB	-0.560545	9.91826	-4.68439	9.8111e-05	0.00735677	1.24261
CG43051	CG43051	CG43051 gene product from transcript CG43051-RB	-0.55989	11.186	-4.36285	0.000220217	0.0135227	0.45866
CG15267	dao	down and out	-0.559664	4.41425	-3.8902	0.000720085	0.0311884	-0.684202
CG6175	CG6175	CG6175 gene product from transcript CG6175-RB	-0.558725	7.68445	-4.7599	8.11582e-05	0.00639952	1.42689
CG11833	Ssl2	Strictosidine synthase-like 2	-0.558179	5.36641	-3.63279	0.00136435	0.0481645	-1.29657
CG1628	CG1628	CG1628 gene product from transcript CG1628-RB	-0.557656	6.73969	-4.56535	0.000132337	0.00921247	0.952152
CG2560	Cpr11A	Cuticular protein 11A	-0.556964	5.70632	-3.70912	0.00112958	0.0427377	-1.11599
CG40191	CG40191	CG40191 gene product from transcript CG40191-RC	-0.556349	11.8588	-7.32872	1.67292e-07	4.46669e-05	7.45104
CG11066	scaf	scarface	-0.555008	8.949	-4.35726	0.000223337	0.0136152	0.445043
CG17574	CG17574	CG17574 gene product from transcript CG17574-RA	-0.553234	9.73101	-6.49228	1.16021e-06	0.000229787	5.5668
CG6339	rad50	CG6339 gene product from transcript CG6339-RE	-0.55291	11.6336	-5.83768	5.59738e-06	0.000819899	4.03218
CG10931	CG10931	CG10931 gene product from transcript CG10931-RA	-0.547263	4.39758	-3.7712	0.000968345	0.0385532	-0.968472
CG33483	CG33483	CG33483 gene product from transcript CG33483-RB	-0.541435	4.05935	-3.81233	0.000874236	0.0357023	-0.870437
CG10618	CHKov1	CG10618 gene product from transcript CG10618-RB	-0.541089	10.4685	-4.07213	0.000456941	0.0227586	-0.246479
CG42734	Ank2	Ankyrin 2	-0.538536	4.51051	-3.93101	0.000650366	0.0290947	-0.58632
CG6538	TfIIFbeta	Transcription factor TFIIFbeta	-0.535498	10.3272	-5.08013	3.63858e-05	0.00346495	2.20729
CG6169	Dcp2	Decapping protein 2	-0.533219	11.7751	-3.95271	0.000616057	0.0280659	-0.534197
CG32016	CG32016	CG32016 gene product from transcript CG32016-RB	-0.532995	11.3695	-4.77562	7.80175e-05	0.00621012	1.46524
CG8454	Vps16A	Vacuolar protein sorting 16A	-0.531685	9.83161	-8.49914	1.29803e-08	5.07025e-06	9.92328
CG8967	otk	off-track	-0.53134	8.90795	-3.8372	0.00082177	0.0342174	-0.81105
CG14362	CG14362	CG14362 gene product from transcript CG14362-RA	-0.529782	4.27272	-4.07005	0.000459323	0.0227965	-0.251491
CG14907	CG14907	CG14907 gene product from transcript CG14907-RB	-0.524231	8.36382	-4.47918	0.000164359	0.0108849	0.742023
CG33991	nuf	nuclear fallout	-0.523495	6.73834	-5.70584	7.72636e-06	0.00104469	3.71775
CG3630	CG3630	CG3630 gene product from transcript CG3630-RA	-0.522244	8.10337	-5.61622	9.62809e-06	0.00124211	3.50312
CG9170	CG9170	CG9170 gene product from transcript CG9170-RB	-0.521927	10.2016	-4.76185	8.07613e-05	0.00638014	1.43165
CG3036	CG3036	CG3036 gene product from transcript CG3036-RA	-0.521355	7.56093	-3.62629	0.0013864	0.0486202	-1.31188
CG1338	hydra	CG1338 gene product from transcript CG1338-RA	-0.515965	5.7693	-3.83286	0.000830693	0.0343902	-0.821415
CG6185	Ir68a	Ionotropic receptor 68a	-0.512493	6.7163	-4.16684	0.000360346	0.0193898	-0.0173846
CG7391	Clk	Clock	-0.512401	4.89882	-4.08585	0.000441495	0.022252	-0.213327
CG10236	LanA	Laminin A	-0.511379	12.3636	-4.64957	0.000107084	0.00782918	1.15763
CG16928	mre11	meiotic recombination 11	-0.509732	10.9251	-4.96297	4.87727e-05	0.00432389	1.92209
CG1007	emc	extra macrochaetae	-0.509088	11.7028	-5.78418	6.37833e-06	0.000896921	3.90477
CG32100	CG32100	CG32100 gene product from transcript CG32100-RA	-0.506025	6.79992	-4.67443	0.000100596	0.00745826	1.21832
CG5029	SamDC	S-adenosylmethionine decarboxylase	-0.502109	8.87499	-4.47463	0.000166253	0.0109587	0.730923
CG16800	CG16800	CG16800 gene product from transcript CG16800-RB	-0.499642	6.22184	-4.03475	0.000501778	0.0242726	-0.336678
CG42720	CG42720	CG42720 gene product from transcript CG42720-RA	-0.499273	4.38243	-3.84809	0.000799785	0.0335385	-0.78502
CG12052	lola	longitudinals lacking	-0.498769	10.4813	-3.96334	0.000599913	0.0275086	-0.50865
CG9147	CG9147	CG9147 gene product from transcript CG9147-RB	-0.49829	10.6415	-4.82061	6.96869e-05	0.00565348	1.575
CG7831	ncd	non-claret disjunctional	-0.497667	10.5829	-5.99711	3.79912e-06	0.000595799	4.4102
CG12210	Syb	Synaptobrevin	-0.496598	8.32082	-5.02114	4.21656e-05	0.00387537	2.06376
CG4226	GluRIIC	Glutamate receptor IIC	-0.496361	4.68903	-4.07129	0.000457895	0.0227792	-0.248489
CG17064	mars	CG17064 gene product from transcript CG17064-RB	-0.494862	10.3958	-3.97109	0.000588396	0.0272329	-0.489997
CG11516	Ptp99A	Protein tyrosine phosphatase 99A	-0.493221	9.04469	-4.00489	0.000540714	0.0256876	-0.408654
CG32201	CG32201	CG32201 gene product from transcript CG32201-RB	-0.492332	4.56484	-4.31793	0.000246548	0.0145963	0.349369
CG42732	CG42732	CG42732 gene product from transcript CG42732-RH	-0.491216	4.44479	-4.3632	0.000220027	0.0135227	0.459492
CG10491	vn	vein	-0.490171	9.88948	-3.63854	0.00134509	0.0477743	-1.28298
CG15629	CG15629	CG15629 gene product from transcript CG15629-RA	-0.490119	5.61244	-3.83726	0.000821645	0.0342174	-0.810904
CG7378	CG7378	CG7378 gene product from transcript CG7378-RB	-0.489525	4.69104	-3.88887	0.000722477	0.0312599	-0.687388
CG11856	Nup358	Nucleoporin 358	-0.488388	10.5539	-5.23815	2.45372e-05	0.0025943	2.59106
CG34405	NaCP60E	Na channel protein 60E	-0.486748	7.11243	-6.51118	1.10948e-06	0.000221823	5.61037
CG2023	CG2023	CG2023 gene product from transcript CG2023-RA	-0.484539	6.53897	-3.99909	0.000548607	0.0259153	-0.422605
CG42673	CG42673	CG42673 gene product from transcript CG42673-RD	-0.479095	7.11145	-3.71966	0.00110047	0.042051	-1.09099
CG17612	CG17612	CG17612 gene product from transcript CG17612-RB	-0.477604	9.55311	-4.36084	0.000221335	0.0135322	0.453758
CG10151	CG10151	CG10151 gene product from transcript CG10151-RA	-0.477525	7.57178	-5.44382	1.47301e-05	0.00178052	3.08846
CG17342	Lk6	CG17342 gene product from transcript CG17342-RA	-0.477397	10.6843	-4.06544	0.000464654	0.023034	-0.262613
CG6214	MRP	Multidrug-Resistance like Protein 1	-0.476902	9.91078	-5.56083	1.10346e-05	0.00139011	3.37014
CG6986	Proc-R	Proctolin receptor	-0.473711	5.0092	-4.59866	0.000121703	0.00861434	1.03343
CG18069	CaMKII	Calcium/calmodulin-dependent protein kinase II	-0.473249	10.8425	-4.52505	0.000146453	0.00996493	0.853851
CG10605	caup	caupolican	-0.472137	10.3493	-3.74263	0.00103952	0.0405744	-1.03643
CG4650	CG4650	CG4650 gene product from transcript CG4650-RB	-0.472021	4.56913	-3.69194	0.00117868	0.043694	-1.15671
CG2788	Dot	Dorothy	-0.47093	7.994	-5.5667	1.0876e-05	0.00138198	3.38425
CG17104	CG17104	CG17104 gene product from transcript CG17104-RA	-0.469082	8.16661	-4.33355	0.000237052	0.014192	0.38737
CG12090	CG12090	CG12090 gene product from transcript CG12090-RB	-0.468488	8.39142	-4.09486	0.000431634	0.0219773	-0.191548
CG17610	grk	gurken	-0.467666	4.50549	-3.86925	0.0007587	0.0323625	-0.734381
CG12559	rl	rolled	-0.46644	9.67322	-6.36384	1.57398e-06	0.000296428	5.26951
CG5690	CG5690	CG5690 gene product from transcript CG5690-RA	-0.465384	10.7744	-4.66428	0.000103195	0.00761682	1.19355
CG11148	CG11148	CG11148 gene product from transcript CG11148-RD	-0.461569	12.8718	-3.64472	0.00132471	0.0473664	-1.26839
CG1506	Ac3	CG1506 gene product from transcript CG1506-RA	-0.46114	6.77906	-3.66169	0.0012703	0.0461576	-1.2283
CG10916	CG10916	CG10916 gene product from transcript CG10916-RA	-0.459652	7.54881	-3.6219	0.00140151	0.049059	-1.32224
CG13663	CG13663	CG13663 gene product from transcript CG13663-RA	-0.457544	10.0392	-4.75841	8.1463e-05	0.00641156	1.42325
CG14121	ver	verrocchio	-0.456982	10.575	-3.64463	0.00132503	0.0473664	-1.26862
CG18536	CG18536	CG18536 gene product from transcript CG18536-RA	-0.455603	5.25753	-4.94451	5.10796e-05	0.00447993	1.87712
CG1028	Antp	Antennapedia	-0.454168	10.1213	-3.63695	0.00135039	0.0478808	-1.28674
CG33475	CG33475	CG33475 gene product from transcript CG33475-RA	-0.451462	4.5318	-4.49034	0.000159813	0.0106339	0.769211
CG11382	CG11382	CG11382 gene product from transcript CG11382-RB	-0.44739	4.49446	-4.14589	0.000379792	0.0200776	-0.0681141
CG12725	CG12725	CG12725 gene product from transcript CG12725-RA	-0.444672	4.83061	-3.85709	0.000782055	0.0329588	-0.763496
CG42281	bun	bunched	-0.443311	7.11121	-3.87066	0.000756042	0.0323145	-0.73101
CG32685	CG32685	CG32685 gene product from transcript CG32685-RC	-0.442063	9.87291	-4.91968	5.4358e-05	0.00471841	1.8166
CG1512	Cul-2	Cullin-2	-0.440526	11.7526	-5.18181	2.82333e-05	0.00287	2.45436
CG31883	CG31883	CG31883 gene product from transcript CG31883-RA	-0.439381	5.39517	-4.35125	0.000226736	0.0137429	0.430424
CG32486	CG32486	CG32486 gene product from transcript CG32486-RD	-0.438586	9.32164	-4.5218	0.000147655	0.0100022	0.845926
CG3008	CG3008	CG3008 gene product from transcript CG3008-RA	-0.436599	10.3977	-4.71797	9.01725e-05	0.00692899	1.32456
CG4300	CG4300	CG4300 gene product from transcript CG4300-RB	-0.435769	5.28141	-3.6602	0.001275	0.0462833	-1.23183
CG15309	CG15309	CG15309 gene product from transcript CG15309-RA	-0.433947	9.55087	-3.80452	0.00089138	0.0362971	-0.889065
CG10965	Corp	Companion of reaper	-0.432385	5.84445	-4.87344	6.10384e-05	0.00511921	1.70385
CG7627	CG7627	CG7627 gene product from transcript CG7627-RB	-0.42997	10.7102	-3.9779	0.000578475	0.0268466	-0.473634
CG5247	Irbp	Inverted repeat-binding protein	-0.429874	10.315	-4.68923	9.6924e-05	0.00732766	1.25443
CG18542	CG18542	CG18542 gene product from transcript CG18542-RA	-0.426592	10.1947	-4.88283	5.96174e-05	0.00503004	1.72676
CG12750	ncm	nucampholin	-0.423595	10.5798	-4.38562	0.000207965	0.0129589	0.514075
CG30170	bgcn	benign gonial cell neoplasm	-0.42351	5.89275	-4.37573	0.000213201	0.0131685	0.490001
CG1464	ey	eyeless	-0.423103	5.3943	-3.61488	0.00142599	0.0496753	-1.33878
CG31694	CG31694	CG31694 gene product from transcript CG31694-RA	-0.422152	9.36589	-3.90745	0.000689767	0.0302201	-0.642864
CG43293	CG43293	CG43293 gene product from transcript CG43293-RA	-0.42069	7.07042	-3.71678	0.00110834	0.0421229	-1.09782
CG7546	CG7546	CG7546 gene product from transcript CG7546-RD	-0.420035	10.0957	-5.13897	3.14154e-05	0.00307492	2.35033
CG6117	Pka-C3	cAMP-dependent protein kinase 3	-0.419023	9.06108	-4.4862	0.000161485	0.0107282	0.759125
CG30011	gem	gemini	-0.415889	9.45609	-3.66909	0.00124727	0.0455562	-1.21081
CG8104	nudE	CG8104 gene product from transcript CG8104-RB	-0.415267	9.28708	-4.45116	0.000176362	0.0114286	0.67372
CG32438	Smc5	CG32438 gene product from transcript CG32438-RE	-0.414883	11.4025	-3.62627	0.00138648	0.0486202	-1.31194
CG12283	kek1	kekkon-1	-0.413951	10.0245	-3.63879	0.00134427	0.0477743	-1.2824
CG8891	CG8891	CG8891 gene product from transcript CG8891-RA	-0.413447	11.6074	-3.63599	0.00135361	0.0479456	-1.28901
CG43751	NA	NA	-0.413169	5.21855	-3.89756	0.00070699	0.0307475	-0.666566
CG42671	CG42671	CG42671 gene product from transcript CG42671-RG	-0.41222	9.74214	-4.15919	0.000367329	0.0196651	-0.0359104
CG4381	GstD3	Glutathione S transferase D3	-0.411035	12.8185	-4.37662	0.000212724	0.0131583	0.49217
CG31174	CG31174	CG31174 gene product from transcript CG31174-RA	-0.41092	5.71315	-3.66582	0.00125738	0.0457275	-1.21853
CG3980	Cep97	CG3980 gene product from transcript CG3980-RC	-0.409183	9.70835	-5.37492	1.74703e-05	0.00203675	2.92213
CG2914	Ets21C	Ets at 21C	-0.407303	5.50428	-4.4102	0.000195499	0.0123279	0.573928
CG40498	CG40498	CG40498 gene product from transcript CG40498-RF	-0.407163	4.51014	-3.90559	0.000692974	0.0303255	-0.647323
CG7097	hppy	happyhour	-0.407092	8.01945	-3.77368	0.0009624	0.0384104	-0.96257
CG4694	her	hermaphrodite	-0.401635	11.134	-3.94688	0.000625092	0.0282941	-0.548201
CG31808	CG31808	CG31808 gene product from transcript CG31808-RC	-0.397012	6.45163	-4.58727	0.000125241	0.00879143	1.00562
CG3048	Traf4	TNF-receptor-associated factor 4	-0.39646	9.01139	-5.70218	7.79606e-06	0.0010474	3.70899
CG10704	toe	twin of eyg	-0.39316	11.5309	-5.2993	2.10767e-05	0.00230946	2.73921
CG4364	CG4364	CG4364 gene product from transcript CG4364-RA	-0.393	13.2132	-5.7411	7.08711e-06	0.000973865	3.80199
CG9288	CG9288	CG9288 gene product from transcript CG9288-RA	-0.391467	11.136	-4.06317	0.000467304	0.023084	-0.268095
CG7414	CG7414	CG7414 gene product from transcript CG7414-RC	-0.389231	9.30096	-3.61392	0.00142938	0.0497524	-1.34104
CG11372	galectin	CG11372 gene product from transcript CG11372-RD	-0.386132	11.7073	-4.10698	0.00041872	0.0215225	-0.162255
CG4686	CG4686	CG4686 gene product from transcript CG4686-RA	-0.385641	12.0133	-4.82923	6.81958e-05	0.00555343	1.59603
CG10904	CG10904	CG10904 gene product from transcript CG10904-RA	-0.379228	10.6863	-4.10197	0.000424011	0.0216553	-0.174364
CG40160	CG40160	CG40160 gene product from transcript CG40160-RE	-0.37683	13.137	-4.59352	0.000123288	0.00868282	1.02087
CG32792	CG32792	CG32792 gene product from transcript CG32792-RG	-0.376289	4.88169	-3.91541	0.00067619	0.0297764	-0.623756
CG9186	CG9186	CG9186 gene product from transcript CG9186-RB	-0.375985	11.4314	-4.24491	0.000296203	0.016529	0.171951
CG3714	CG3714	CG3714 gene product from transcript CG3714-RC	-0.375058	8.17022	-4.09464	0.000431878	0.0219773	-0.192093
CG10473	Acn	Acinus	-0.374514	11.4177	-4.26042	0.000284885	0.0160242	0.209607
CG5059	CG5059	CG5059 gene product from transcript CG5059-RD	-0.374023	12.0627	-3.65819	0.00128134	0.0463988	-1.23658
CG17806	CG17806	CG17806 gene product from transcript CG17806-RA	-0.373851	9.04297	-4.10589	0.00041987	0.0215482	-0.1649
CG3653	kirre	kin of irre	-0.368656	8.83472	-4.52567	0.000146226	0.00996493	0.855357
CG42268	CG42268	CG42268 gene product from transcript CG42268-RD	-0.366198	9.46921	-3.68341	0.00120385	0.0442865	-1.17692
CG42806	CG42806	CG42806 gene product from transcript CG42806-RB	-0.362557	12.6681	-3.81564	0.000867072	0.0354785	-0.862543
CG7266	Eip71CD	Ecdysone-induced protein 28/29kD	-0.362414	10.4707	-4.14787	0.000377908	0.0200282	-0.0633147
CG2928	Reg-5	Rhythmically expressed gene 5	-0.361924	10.5397	-4.22346	0.000312601	0.0172384	0.119887
CG11847	Clbn	Caliban	-0.360028	12.4959	-4.29639	0.000260262	0.0151859	0.29701
CG31251	CG31251	CG31251 gene product from transcript CG31251-RA	-0.35406	10.7943	-3.92511	0.000660018	0.0294329	-0.600485
CG42310	prom	prominin	-0.354047	4.46636	-3.65537	0.00129031	0.046524	-1.24325
CG7922	CG7922	CG7922 gene product from transcript CG7922-RA	-0.35289	9.86535	-4.07515	0.000453496	0.0226298	-0.239183
CG8222	Pvr	PDGF- and VEGF-receptor related	-0.352656	8.51955	-4.07027	0.000459074	0.0227965	-0.250968
CG33694	cana	CENP-ana	-0.352449	8.47203	-3.62168	0.00140229	0.049059	-1.32277
CG15415	Spindly	CG15415 gene product from transcript CG15415-RB	-0.352347	11.151	-4.31769	0.000246697	0.0145963	0.348784
CG31864	Qtzl	Quetzalcoatl	-0.345866	10.9808	-4.29819	0.000259086	0.0151403	0.301389
CG3396	Ocho	CG3396 gene product from transcript CG3396-RB	-0.343916	9.99809	-4.19663	0.000334382	0.0182487	0.0548232
CG10399	CG10399	CG10399 gene product from transcript CG10399-RA	-0.341829	10.4567	-3.69226	0.00117776	0.043694	-1.15596
CG13532	CG13532	CG13532 gene product from transcript CG13532-RA	-0.340884	4.91627	-3.84563	0.000804691	0.0337107	-0.790891
CG30118	CG30118	CG30118 gene product from transcript CG30118-RB	-0.335373	10.5302	-4.28115	0.000270421	0.0155422	0.259983
CG18468	Lhr	Lethal hybrid rescue	-0.333555	9.34166	-3.86139	0.00077371	0.0328263	-0.753196
CG1864	Hr38	Hormone receptor-like in 38	-0.330632	4.6965	-3.94709	0.000624773	0.0282941	-0.547711
CG32196	CG32196	CG32196 gene product from transcript CG32196-RB	-0.330126	5.32788	-4.08302	0.000444639	0.0223437	-0.22017
CG32491	mod(mdg4)	modifier of mdg4	-0.328815	11.0934	-3.69582	0.00116742	0.0435444	-1.14752
CG5235	CG5235	CG5235 gene product from transcript CG5235-RA	-0.32808	9.73179	-3.99863	0.000549239	0.0259153	-0.423713
CG31033	CG31033	CG31033 gene product from transcript CG31033-RC	-0.32716	8.28085	-5.05209	3.90258e-05	0.00366746	2.13909
CG17436	vtd	verthandi	-0.323659	12.1229	-4.2694	0.000278524	0.01594	0.231437
CG15745	CG15745	CG15745 gene product from transcript CG15745-RB	-0.321708	5.95706	-3.90847	0.000688007	0.0302201	-0.640409
CG8153	mus210	mutagen-sensitive 210	-0.320794	11.9575	-4.06467	0.000465554	0.0230479	-0.264478
CG14821	tow	target of wingless	-0.31585	5.63726	-3.66623	0.00125613	0.0457237	-1.21758
CG8108	CG8108	CG8108 gene product from transcript CG8108-RA	-0.311493	11.0743	-4.01808	0.000523157	0.0250226	-0.376868
CG42581	CG42581	CG42581 gene product from transcript CG42581-RA	-0.309458	4.30447	-3.76268	0.000989066	0.0390099	-0.988764
CG18789	CG18789	CG18789 gene product from transcript CG18789-RA	-0.307866	9.01762	-4.10735	0.000418332	0.0215225	-0.16136
CG10741	CG10741	CG10741 gene product from transcript CG10741-RB	-0.306158	11.3942	-4.16431	0.000362639	0.0194635	-0.0235059
CG4859	Mmp1	Matrix metalloproteinase 1	-0.295742	9.33866	-3.74162	0.00104212	0.0405998	-1.03883
CG8038	CG8038	CG8038 gene product from transcript CG8038-RA	-0.295404	11.2627	-4.28202	0.000269834	0.0155296	0.262085
CG3227	CG3227	CG3227 gene product from transcript CG3227-RA	-0.291178	10.6886	-3.83814	0.000819846	0.0342097	-0.8088
CG32843	Dh31-R1	Diuretic hormone 31 receptor 1	-0.284711	5.84428	-3.7366	0.00105519	0.0409355	-1.05076
CG2807	CG2807	CG2807 gene product from transcript CG2807-RA	-0.278494	12.0545	-4.38042	0.000210704	0.0131032	0.501406
CG18787	CG18787	CG18787 gene product from transcript CG18787-RA	-0.275144	8.98911	-3.8035	0.000893644	0.0363542	-0.891499
CG3423	SA	Stromalin	-0.273788	11.3238	-3.62787	0.00138102	0.0485498	-1.30817
CG1311	CG1311	CG1311 gene product from transcript CG1311-RA	-0.272897	12.21	-4.05874	0.000472528	0.0232875	-0.278809
CG8902	Nuf2	CG8902 gene product from transcript CG8902-RA	-0.271822	11.6837	-3.92979	0.000652352	0.0291218	-0.589252
CG2013	UbcD6	Ubiquitin conjugating enzyme	-0.267006	11.1293	-3.63687	0.00135064	0.0478808	-1.28692
CG2791	CD98hc	CD98 heavy chain	-0.258794	13.8566	-4.21137	0.000322234	0.0177002	0.0905654
CG6754	nbs	CG6754 gene product from transcript CG6754-RD	-0.254799	11.083	-3.77412	0.00096134	0.0384104	-0.961514
CG11278	Syx13	Syntaxin 13	0.250331	10.8929	3.62162	0.00140248	0.049059	-1.3229
CG6105	l(2)06225	lethal (2) 06225	0.260229	15.4004	4.03658	0.000499483	0.024192	-0.332263
CG6213	Vha13	Vacuolar H[+] ATPase G-subunit	0.275647	13.9276	3.613	0.00143264	0.0497941	-1.34322
CG43867	NA	NA	0.277508	5.89046	3.9838	0.00057	0.026629	-0.45943
CG4108	Chmp1	CG4108 gene product from transcript CG4108-RA	0.280812	11.511	3.9074	0.000689848	0.0302201	-0.642978
CG12050	CG12050	CG12050 gene product from transcript CG12050-RB	0.281388	8.47559	3.68332	0.00120411	0.0442865	-1.17713
CG13889	CG13889	CG13889 gene product from transcript CG13889-RA	0.286222	5.86866	4.03245	0.000504676	0.0243596	-0.342226
CG5341	sec6	CG5341 gene product from transcript CG5341-RA	0.292721	9.68865	4.33335	0.000237172	0.014192	0.386878
CG14181	Use1	CG14181 gene product from transcript CG14181-RA	0.295636	11.2846	3.95959	0.000605565	0.0277075	-0.517671
CG7824	CG7824	CG7824 gene product from transcript CG7824-RC	0.295742	10.8662	3.78955	0.000925186	0.0373523	-0.924764
CG42774	pre-mod(mdg4)-AE	CG42774 gene product from transcript CG42774-RA	0.302382	9.35411	3.83023	0.00083615	0.0344808	-0.827699
CG11188	CG11188	CG11188 gene product from transcript CG11188-RA	0.303707	10.06	3.63521	0.00135621	0.0479976	-1.29085
CG15920	resilin	CG15920 gene product from transcript CG15920-RA	0.308248	4.68459	3.67357	0.00123352	0.0451712	-1.20021
CG7137	CG7137	CG7137 gene product from transcript CG7137-RA	0.316875	11.3663	3.78393	0.000938199	0.0377301	-0.938155
CG31692	fbp	fructose-1,6-bisphosphatase	0.32231	11.9819	4.24348	0.000297266	0.016546	0.168489
CG7943	CG7943	CG7943 gene product from transcript CG7943-RB	0.323146	9.31347	3.68715	0.00119274	0.044022	-1.16805
CG7447	slow	slowdown	0.325535	10.0836	4.45469	0.000174804	0.0113451	0.682317
CG9027	CG9027	CG9027 gene product from transcript CG9027-RD	0.325752	12.9233	4.56258	0.000133262	0.0092616	0.945392
CG10882	gho	ghost	0.325961	9.36185	3.76315	0.000987902	0.0390099	-0.987636
CG11537	CG11537	CG11537 gene product from transcript CG11537-RB	0.329029	7.87776	3.70205	0.00114955	0.0430685	-1.13276
CG3254	pgant2	polypeptide GalNAc transferase 2	0.330623	5.22536	3.72643	0.00108215	0.0416908	-1.07492
CG13465	CG13465	CG13465 gene product from transcript CG13465-RA	0.332585	4.73473	3.86071	0.00077502	0.0328263	-0.754819
CG11563	CG11563	CG11563 gene product from transcript CG11563-RA	0.333105	12.4237	4.20826	0.000324764	0.017816	0.0830125
CG7748	OstStt3	Oligosaccharyl transferase 3	0.335223	14.5032	3.69311	0.00117528	0.043661	-1.15394
CG2957	mRpS9	mitochondrial ribosomal protein S9	0.335992	10.8526	4.07766	0.000450649	0.0225517	-0.233114
CG30464	Ir52d	Ionotropic receptor 52d	0.336854	4.35808	3.61516	0.00142501	0.0496753	-1.33812
CG42572	MCPH1	Microcephalin	0.339521	7.71253	3.99777	0.000550423	0.0259153	-0.425786
CG18466	Nmdmc	NAD-dependent methylenetetrahydrofolate dehydrogenase	0.340382	11.6278	3.68231	0.00120712	0.0443585	-1.17952
CG3944	ND23	NADH:ubiquinone reductase 23kD subunit precursor	0.343404	10.3481	3.87247	0.000752646	0.032202	-0.726687
CG13695	gk	geko	0.343541	8.46888	3.88299	0.000733154	0.031657	-0.701482
CG1371	CG1371	CG1371 gene product from transcript CG1371-RA	0.345147	9.76814	4.26543	0.000281316	0.0159607	0.221794
CG14985	CG14985	CG14985 gene product from transcript CG14985-RB	0.348949	10.4589	3.6336	0.00136161	0.048108	-1.29465
CG4326	mRpS17	mitochondrial ribosomal protein S17	0.350438	10.0527	3.65155	0.00130254	0.0468476	-1.25226
CG18731	CG18731	CG18731 gene product from transcript CG18731-RA	0.351339	12.0303	4.58487	0.000125996	0.00882938	0.999783
CG6232	CG6232	CG6232 gene product from transcript CG6232-RB	0.354085	5.2205	3.97086	0.000588735	0.0272329	-0.490552
CG43395	cngl	CNG channel-like	0.354095	4.66277	4.19938	0.000332083	0.0181467	0.0614858
CG43244	CG43244	CG43244 gene product from transcript CG43244-RA	0.354426	4.39255	3.99789	0.00055026	0.0259153	-0.425502
CG18471	gprs	CG18471 gene product from transcript CG18471-RA	0.355025	4.54212	3.72544	0.0010848	0.0416995	-1.07726
CG12895	CG12895	CG12895 gene product from transcript CG12895-RA	0.355467	10.6022	3.66825	0.00124987	0.0456117	-1.2128
CG9761	Nep2	Neprilysin 2	0.355581	12.0777	4.76262	8.06055e-05	0.00637978	1.43353
CG8253	tun	tungus	0.355952	9.01535	3.92365	0.000662429	0.0294781	-0.60399
CG33230	CG33230	CG33230 gene product from transcript CG33230-RA	0.356724	9.45803	4.07557	0.000453016	0.0226298	-0.238163
CG34261	CG34261	CG34261 gene product from transcript CG34261-RB	0.360365	9.23691	4.74775	8.36722e-05	0.00653817	1.39725
CG30448	Obp56i	Odorant-binding protein 56i	0.363264	5.11214	4.58725	0.000125247	0.00879143	1.00558
CG18446	CG18446	CG18446 gene product from transcript CG18446-RA	0.365462	4.85137	3.79145	0.000920821	0.0372443	-0.920229
CG15304	Neb-cGP	CG15304 gene product from transcript CG15304-RA	0.366102	13.5138	3.7749	0.000959493	0.0384104	-0.95967
CG10165	CG10165	CG10165 gene product from transcript CG10165-RC	0.366322	8.8947	4.85476	6.39649e-05	0.00530142	1.65831
CG18661	CG18661	CG18661 gene product from transcript CG18661-RA	0.367112	10.1917	3.69678	0.00116464	0.0434793	-1.14524
CG5519	Prp19	CG5519 gene product from transcript CG5519-RA	0.36998	12.735	5.17427	2.87686e-05	0.00289472	2.43606
CG6898	Zip3	Zinc/iron regulated transporter-related protein 3	0.371532	8.78716	4.10268	0.00042326	0.0216432	-0.172654
CG5018	l(3)72Dn	lethal (3) 72Dn	0.374843	9.88159	4.23491	0.000303736	0.0168598	0.147683
CG9427	CG9427	CG9427 gene product from transcript CG9427-RA	0.375154	12.7224	3.93134	0.000649838	0.0290947	-0.585538
CG10238	Mocs2	Molybdopterin synthase 2	0.375348	9.14415	4.54257	0.000140139	0.00964422	0.896587
CG43946	NA	NA	0.375374	7.66239	4.47979	0.00016411	0.0108849	0.743493
CG11409	CG11409	CG11409 gene product from transcript CG11409-RB	0.375826	8.417	3.91737	0.000672898	0.0296698	-0.619065
CG7510	CG7510	CG7510 gene product from transcript CG7510-RA	0.376866	8.22384	3.65989	0.00127596	0.0462833	-1.23255
CG4849	CG4849	CG4849 gene product from transcript CG4849-RA	0.377699	12.0442	5.56067	1.10389e-05	0.00139011	3.36975
CG42663	CG42663	CG42663 gene product from transcript CG42663-RB	0.377889	5.99825	4.17028	0.000357244	0.0192474	-0.00903585
CG12792	l(2)09851	lethal (2) 09851	0.379069	11.6971	5.04056	4.01672e-05	0.0037406	2.11102
CG14757	CG14757	CG14757 gene product from transcript CG14757-RA	0.379953	6.96826	4.58404	0.00012626	0.00883317	0.997756
CG6342	Irp-1B	Iron regulatory protein 1B	0.380789	12.4963	4.59558	0.000122649	0.00865229	1.02591
CG10073	CG10073	CG10073 gene product from transcript CG10073-RB	0.383336	4.96323	4.26084	0.000284579	0.0160242	0.210647
CG5731	CG5731	CG5731 gene product from transcript CG5731-RA	0.383639	10.1039	3.73341	0.00106356	0.0411627	-1.05833
CG6199	Plod	procollagen lysyl hydroxylase	0.384301	8.2695	3.89713	0.000707756	0.0307491	-0.667606
CG6612	Adk3	Adenylate kinase-3	0.385575	10.5245	4.95151	5.01927e-05	0.00441131	1.89416
CG32822	CG32822	CG32822 gene product from transcript CG32822-RA	0.387034	5.39015	4.17051	0.000357043	0.0192474	-0.00849353
CG42308	CG42308	CG42308 gene product from transcript CG42308-RA	0.389	11.4752	4.11893	0.000406361	0.0210444	-0.133356
CG10805	l(2)k09022	lethal (2) k09022	0.391854	10.5399	4.44886	0.000177383	0.0114487	0.668125
CG11738	l(1)G0004	lethal (1) G0004	0.392208	10.7165	4.13345	0.000391828	0.0205465	-0.0982193
CG15579	CG15579	CG15579 gene product from transcript CG15579-RA	0.393371	6.71685	3.77104	0.00096872	0.0385532	-0.968843
CG8596	CG8596	CG8596 gene product from transcript CG8596-RA	0.393508	10.8682	4.34742	0.00022893	0.0138362	0.421103
CG2913	yin	CG2913 gene product from transcript CG2913-RA	0.395541	6.60828	3.63846	0.00134537	0.0477743	-1.28318
CG9023	Drip	CG9023 gene product from transcript CG9023-RA	0.396857	9.46355	3.83305	0.000830296	0.0343902	-0.820956
CG18131	CG18131	CG18131 gene product from transcript CG18131-RF	0.404037	5.00193	4.03177	0.000505537	0.0243733	-0.343869
CG34283	CG34283	CG34283 gene product from transcript CG34283-RA	0.40651	4.79465	3.93127	0.000649944	0.0290947	-0.585695
CG12703	CG12703	CG12703 gene product from transcript CG12703-RA	0.410025	9.93145	5.75548	6.84199e-06	0.000946348	3.83632
CG17657	frtz	fritz	0.411795	9.78571	5.14413	3.10137e-05	0.00304266	2.36286
CG6677	ash2	absent, small, or homeotic discs 2	0.413089	10.419	6.02776	3.52736e-06	0.000564358	4.48259
CG3095	hfw	halfway	0.413416	10.0973	4.47773	0.000164962	0.0109077	0.738475
CG7421	Nopp140	CG7421 gene product from transcript CG7421-RB	0.416128	8.38823	5.52365	1.2094e-05	0.00150946	3.28074
CG7950	CG7950	CG7950 gene product from transcript CG7950-RB	0.416649	10.472	3.61217	0.00143556	0.0497941	-1.34516
CG43389	CG43389	CG43389 gene product from transcript CG43389-RA	0.418116	5.67613	3.72911	0.00107497	0.0414902	-1.06855
CG11279	CG11279	CG11279 gene product from transcript CG11279-RA	0.418331	10.6233	3.83521	0.000825843	0.0343006	-0.815796
CG16790	CG16790	CG16790 gene product from transcript CG16790-RA	0.41888	8.81929	4.24608	0.000295335	0.016529	0.174788
CG42677	wb	wing blister	0.420454	8.33583	3.90232	0.000698652	0.0305107	-0.655165
CG10911	CG10911	CG10911 gene product from transcript CG10911-RA	0.420508	4.3583	4.08354	0.00044406	0.0223437	-0.218912
CG6598	Fdh	Formaldehyde dehydrogenase	0.420913	12.7537	4.55268	0.000136621	0.00943289	0.921245
CG11900	Mesh1	Metazoan SpoT homolog-1	0.422944	9.30335	4.08616	0.000441149	0.022252	-0.212573
CG12256	CG12256	CG12256 gene product from transcript CG12256-RA	0.422949	7.35381	3.69066	0.00118244	0.0437949	-1.15975
CG12275	RpS10a	Ribosomal protein S10a	0.426664	5.20843	3.86074	0.000774958	0.0328263	-0.754743
CG3228	kz	kurz	0.429711	7.89329	3.734	0.00106201	0.0411405	-1.05693
CG42256	Dscam2	Down syndrome cell adhesion molecule 2	0.430628	4.80873	4.21584	0.000318633	0.0175253	0.10142
CG1840	CG1840	CG1840 gene product from transcript CG1840-RA	0.431348	8.27666	4.05265	0.000479786	0.023479	-0.293497
CG6098	Lrr47	Leucine-rich repeat 47	0.431495	10.2445	5.7492	6.94797e-06	0.000957867	3.82133
CG9889	yellow-d	CG9889 gene product from transcript CG9889-RA	0.432519	8.63364	3.65909	0.00127849	0.0463352	-1.23444
CG13800	CG13800	CG13800 gene product from transcript CG13800-RB	0.433529	7.67283	4.44803	0.000177758	0.0114487	0.666082
CG3495	Gmer	GDP-4-keto-6-deoxy-D-mannose 3,5-epimerase/4-reductase	0.433948	11.6451	4.2473	0.00029443	0.0165171	0.177755
CG12338	CG12338	CG12338 gene product from transcript CG12338-RA	0.434136	8.30269	4.05221	0.00048031	0.023479	-0.294549
CG8213	CG8213	CG8213 gene product from transcript CG8213-RB	0.434757	5.47748	4.85966	6.31829e-05	0.00526766	1.67027
CG3861	kdn	knockdown	0.436442	9.27883	3.98715	0.000565239	0.0264652	-0.451357
CG10731	CG10731	CG10731 gene product from transcript CG10731-RA	0.436648	9.25969	4.1528	0.000373265	0.019882	-0.0513824
CG8444	VhaM8.9	CG8444 gene product from transcript CG8444-RA	0.440574	12.5756	4.98251	4.64443e-05	0.00417761	1.96969
CG5504	l(2)tid	lethal (2) tumorous imaginal discs	0.441781	9.91518	3.90117	0.000700663	0.0305669	-0.657927
CG10158	CG10158	CG10158 gene product from transcript CG10158-RA	0.443468	8.75756	5.11458	3.33864e-05	0.00322298	2.29106
CG17323	CG17323	CG17323 gene product from transcript CG17323-RD	0.444943	9.33229	4.1534	0.000372702	0.0198772	-0.0499279
CG8366	CG8366	CG8366 gene product from transcript CG8366-RA	0.445037	10.5114	4.46979	0.00016829	0.0110584	0.71912
CG11061	GM130	CG11061 gene product from transcript CG11061-RB	0.448025	10.8011	5.34765	1.86927e-05	0.00212385	2.8562
CG3006	Fmo-1	Flavin-containing monooxygenase 1	0.448336	4.67558	3.90771	0.000689309	0.0302201	-0.642227
CG3501	CG3501	CG3501 gene product from transcript CG3501-RA	0.448828	10.9163	3.9817	0.000572991	0.0267192	-0.464467
CG4670	CG4670	CG4670 gene product from transcript CG4670-RA	0.450549	11.0906	4.89637	5.7628e-05	0.00493122	1.75977
CG17800I	NA	NA	0.452456	5.54059	4.22019	0.000315177	0.0173578	0.111957
CG7366	CG7366	CG7366 gene product from transcript CG7366-RA	0.452995	4.74535	3.70306	0.00114668	0.0430685	-1.13037
CG16824	CG16824	CG16824 gene product from transcript CG16824-RA	0.453318	6.04876	3.7252	0.00108544	0.0416995	-1.07783
CG2962	CG2962	CG2962 gene product from transcript CG2962-RA	0.45443	5.60286	4.16011	0.000366478	0.0196445	-0.0336718
CG42699	CG42699	CG42699 gene product from transcript CG42699-RC	0.455725	6.66213	4.55798	0.000134813	0.00933865	0.934166
CG9523	l(2)k11101	lethal (2) k11101	0.457229	9.97633	4.69029	9.66672e-05	0.00732563	1.25701
CG3083	Prx6005	Peroxiredoxin 6005	0.459158	11.6658	4.68035	9.9112e-05	0.00736116	1.23275
CG7228	pes	peste	0.459421	6.62618	3.74528	0.00103272	0.0403766	-1.03015
CG3040	CG3040	CG3040 gene product from transcript CG3040-RA	0.461153	10.9955	4.30401	0.000255328	0.0149601	0.315522
CG11100	Mes2	CG11100 gene product from transcript CG11100-RB	0.461396	8.74315	3.87373	0.000750273	0.032133	-0.723654
CG16986	CG16986	CG16986 gene product from transcript CG16986-RA	0.46442	8.97329	4.18722	0.000342373	0.0185886	0.0320164
CG14670	Hcs	Holocarboxylase synthetase	0.464844	8.56265	5.15847	2.99242e-05	0.00297031	2.3977
CG12279	CG12279	CG12279 gene product from transcript CG12279-RA	0.466714	11.8229	4.05301	0.000479351	0.023479	-0.292624
CG31495	CG31495	CG31495 gene product from transcript CG31495-RA	0.469562	9.18699	3.72282	0.00109188	0.0418365	-1.08349
CG7341	CG7341	CG7341 gene product from transcript CG7341-RB	0.469582	8.98662	4.6447	0.000108402	0.00786561	1.14575
CG10494	CG10494	CG10494 gene product from transcript CG10494-RA	0.470299	8.44647	4.6097	0.000118373	0.00846388	1.06035
CG8808	Pdk	Pyruvate dehydrogenase kinase	0.472212	11.2424	5.11881	3.30358e-05	0.00319644	2.30135
CG17264	CG17264	CG17264 gene product from transcript CG17264-RA	0.473301	5.4569	4.0028	0.00054354	0.0257638	-0.413672
CG2469	CG2469	CG2469 gene product from transcript CG2469-RB	0.473483	9.08095	3.87663	0.000744883	0.0319671	-0.716728
CG17267	CG17267	CG17267 gene product from transcript CG17267-RA	0.477922	4.52501	4.13987	0.000385569	0.0203067	-0.0826827
CG6584	SelR	CG6584 gene product from transcript CG6584-RI	0.47869	8.76687	5.36688	1.78222e-05	0.00205422	2.90269
CG31705	CG31705	CG31705 gene product from transcript CG31705-RA	0.482651	10.7647	4.69005	9.67235e-05	0.00732563	1.25644
CG4554	CG4554	CG4554 gene product from transcript CG4554-RA	0.483993	9.36629	3.89653	0.000708811	0.0307633	-0.669039
CG2841	ptr	proximal to raf	0.485836	5.36061	4.887	5.89982e-05	0.00499778	1.73692
CG31955	CG31955	CG31955 gene product from transcript CG31955-RB	0.488183	8.6103	4.04883	0.000484391	0.0236511	-0.302703
CG18335	CG18335	CG18335 gene product from transcript CG18335-RA	0.491123	5.72839	3.68806	0.00119005	0.0439612	-1.16589
CG17321	CG17321	CG17321 gene product from transcript CG17321-RA	0.491154	4.31898	3.79262	0.000918144	0.0371716	-0.917437
CG32571	TwdlX	TweedleX	0.493218	4.50455	4.15028	0.000375636	0.0199831	-0.0574945
CG5626	CG5626	CG5626 gene product from transcript CG5626-RA	0.49349	8.26191	4.04057	0.000494515	0.0240378	-0.322632
CG17061	mthl10	methuselah-like 10	0.498842	7.82442	4.07486	0.000453819	0.0226298	-0.239871
CG7203	CG7203	CG7203 gene product from transcript CG7203-RB	0.499455	5.4982	4.40808	0.000196542	0.0123751	0.568778
CG5727	CG5727	CG5727 gene product from transcript CG5727-RA	0.499944	10.484	4.85621	6.37329e-05	0.00529259	1.66184
CG11759	Kap3	Kinesin associated protein 3	0.500356	7.39256	5.90798	4.71664e-06	0.00072355	4.19918
CG13888	Gr61a	Gustatory receptor 61a	0.501125	8.03641	4.3582	0.000222808	0.0136026	0.447338
CG4558	CG4558	CG4558 gene product from transcript CG4558-RA	0.503337	7.38109	5.05839	3.84166e-05	0.00363373	2.15441
CG4103	l(2)35Bc	lethal (2) 35Bc	0.503615	9.30041	4.1461	0.000379596	0.0200776	-0.0676148
CG32718	CG32718	CG32718 gene product from transcript CG32718-RB	0.504331	4.46896	3.64211	0.0013333	0.0475859	-1.27457
CG14434	CG14434	CG14434 gene product from transcript CG14434-RA	0.505439	13.3221	4.1497	0.000376181	0.0199869	-0.058895
CG30456	CG30456	CG30456 gene product from transcript CG30456-RB	0.509357	5.1909	3.88177	0.000735383	0.0316769	-0.704398
CG1349	dj-1beta	CG1349 gene product from transcript CG1349-RA	0.509944	12.7564	5.8788	5.06365e-06	0.000765646	4.12993
CG14823	CG14823	CG14823 gene product from transcript CG14823-RD	0.511918	5.19071	3.778	0.000952114	0.0381805	-0.95227
CG2120	CG2120	CG2120 gene product from transcript CG2120-RB	0.513192	5.4422	4.42554	0.000188099	0.0119505	0.611305
CG42702	Oaz	O/E-associated zinc finger protein	0.516751	6.86361	4.33468	0.000236378	0.0141847	0.390122
CG5961	CG5961	CG5961 gene product from transcript CG5961-RB	0.51971	6.95222	3.62917	0.00137657	0.0484742	-1.30509
CG4778	obst-B	obstructor-B	0.521611	10.9208	3.91867	0.000670721	0.0296283	-0.615949
CG15545	CG15545	CG15545 gene product from transcript CG15545-RA	0.523723	5.97853	4.12228	0.000402961	0.0209351	-0.12525
CG4495	CG4495	CG4495 gene product from transcript CG4495-RA	0.525311	9.6143	4.26513	0.000281528	0.0159607	0.221066
CG8262	ana2	anastral spindle 2	0.525355	10.882	5.81557	5.90757e-06	0.000853482	3.97956
CG6756	Tom70	Translocase of outer membrane 70	0.525356	9.33155	4.33473	0.000236352	0.0141847	0.390232
CG14211	MKP-4	MAPK Phosphatase 4	0.527523	8.09781	3.92151	0.000665982	0.0295413	-0.609133
CG1944	Cyp4p2	CG1944 gene product from transcript CG1944-RA	0.527906	11.379	4.40102	0.000200067	0.0125783	0.551563
CG11655	CG11655	CG11655 gene product from transcript CG11655-RA	0.529399	7.27374	3.71718	0.00110725	0.0421229	-1.09687
CG17332	VhaSFD	Vacuolar H[+]-ATPase SFD subunit	0.529962	11.0697	7.20301	2.2254e-07	5.52241e-05	7.17386
CG32441	CG32441	CG32441 gene product from transcript CG32441-RD	0.530553	12.6892	5.22099	2.5608e-05	0.002674	2.54944
CG32195	CG32195	CG32195 gene product from transcript CG32195-RA	0.532883	7.04081	5.04954	3.92761e-05	0.00366746	2.13287
CG31638	CG31638	CG31638 gene product from transcript CG31638-RA	0.535199	7.33978	3.8598	0.000776789	0.0328682	-0.757008
CG31628	ade3	adenosine 3	0.536968	12.19	5.41074	1.59868e-05	0.00191054	3.00864
CG14696	CG14696	CG14696 gene product from transcript CG14696-RA	0.543407	9.8006	4.16597	0.00036113	0.0194072	-0.0194808
CG4210	CG4210	CG4210 gene product from transcript CG4210-RC	0.545858	10.5727	3.85881	0.000778696	0.0328829	-0.759363
CG13194	pyr	pyramus	0.547221	5.32117	4.3556	0.000224268	0.0136522	0.441016
CG10922	La	La autoantigen-like	0.548257	13.152	4.4271	0.000187363	0.0119217	0.615098
CG11779	CG11779	CG11779 gene product from transcript CG11779-RB	0.548526	7.13513	3.86709	0.000762793	0.0324714	-0.739548
CG9614	pip	pipe	0.548868	6.52868	4.77579	7.79838e-05	0.00621012	1.46566
CG4094	l(1)G0255	lethal (1) G0255	0.549041	13.3742	4.44833	0.000177622	0.0114487	0.666822
CG3033	CG3033	CG3033 gene product from transcript CG3033-RA	0.550677	12.0172	5.8042	6.07392e-06	0.000864953	3.95247
CG1503	CG1503	CG1503 gene product from transcript CG1503-RA	0.552829	5.89761	4.12334	0.000401887	0.0209051	-0.122676
CG1575	CG1575	CG1575 gene product from transcript CG1575-RA	0.555564	10.5022	3.74013	0.001046	0.0407072	-1.04238
CG5896	grass	Gram-positive Specific Serine protease	0.556554	8.92594	4.51035	0.000151968	0.0102248	0.818005
CG15046	CG15046	CG15046 gene product from transcript CG15046-RA	0.557327	6.59295	4.97974	4.6767e-05	0.00419769	1.96295
CG3782	mRpL28	mitochondrial ribosomal protein L28	0.560211	12.2175	5.01401	4.2925e-05	0.00392805	2.04638
CG6656	CG6656	CG6656 gene product from transcript CG6656-RA	0.560321	9.93215	7.38617	1.46941e-07	3.97361e-05	7.57696
CG9438	Cyp6a2	Cytochrome P450-6a2	0.562425	4.96661	4.04051	0.000494592	0.0240378	-0.322782
CG42827	CG42827	CG42827 gene product from transcript CG42827-RC	0.56455	4.46971	4.73462	8.64783e-05	0.00668164	1.3652
CG11133	CG11133	CG11133 gene product from transcript CG11133-RA	0.566103	5.35017	4.10886	0.00041675	0.0214927	-0.157706
CG42562	CG42562	CG42562 gene product from transcript CG42562-RA	0.5672	6.47091	6.15999	2.56404e-06	0.000437921	4.79369
CG11009	CG11009	CG11009 gene product from transcript CG11009-RB	0.567512	8.16978	4.74599	8.40444e-05	0.0065536	1.39293
CG4320	raptor	CG4320 gene product from transcript CG4320-RA	0.569183	7.30581	5.23361	2.48161e-05	0.0026107	2.58005
CG16979	CG16979	CG16979 gene product from transcript CG16979-RA	0.570043	10.6232	6.98618	3.65814e-07	8.47924e-05	6.69067
CG11905	CG11905	CG11905 gene product from transcript CG11905-RB	0.571359	7.09647	3.71027	0.00112636	0.042654	-1.11326
CG1857	nec	necrotic	0.578168	6.49452	3.86595	0.000764974	0.0325286	-0.742291
CG6094	CG6094	CG6094 gene product from transcript CG6094-RA	0.580882	11.2884	5.31647	2.01965e-05	0.00223625	2.78078
CG17044	yellow-e2	CG17044 gene product from transcript CG17044-RB	0.581116	10.53	6.12066	2.81868e-06	0.000477546	4.70135
CG12163	CG12163	CG12163 gene product from transcript CG12163-RB	0.582421	8.4001	5.80919	6.00031e-06	0.000859962	3.96437
CG14565	CG14565	CG14565 gene product from transcript CG14565-RA	0.584211	5.92303	4.14421	0.000381395	0.0201371	-0.0721779
CG5451	CG5451	CG5451 gene product from transcript CG5451-RB	0.58641	10.8769	6.07496	3.14713e-06	0.00052254	4.59385
CG32448	CG32448	CG32448 gene product from transcript CG32448-RC	0.587967	10.283	5.43507	1.50526e-05	0.00180914	3.06735
CG10392	sxc	super sex combs	0.591205	11.7792	5.40264	1.63109e-05	0.00193284	2.98907
CG3759	CG3759	CG3759 gene product from transcript CG3759-RB	0.592144	5.16822	4.55981	0.000134194	0.00931103	0.938633
CG9771	Dip2	Dorsal interacting protein 2	0.593705	11.2298	6.39934	1.44645e-06	0.000276677	5.35187
CG2210	awd	abnormal wing discs	0.595522	12.0092	4.3117	0.000250436	0.0147555	0.334232
CG10363	TepIV	Thiolester containing protein IV	0.595725	12.1256	5.57357	1.06935e-05	0.00136289	3.40076
CG1516	CG1516	CG1516 gene product from transcript CG1516-RP	0.596238	10.3423	5.63456	9.20364e-06	0.00119835	3.54709
CG12241	CG12241	CG12241 gene product from transcript CG12241-RA	0.598329	6.77545	5.46158	1.40973e-05	0.00171436	3.13127
CG42311	grh	grainy head	0.601391	12.9222	4.2862	0.000267013	0.0154941	0.272248
CG10200	CG10200	CG10200 gene product from transcript CG10200-RB	0.605096	12.3683	7.12943	2.63246e-07	6.34588e-05	7.01061
CG33498	CG33498	CG33498 gene product from transcript CG33498-RA	0.606585	10.4514	3.86991	0.000757449	0.0323419	-0.732797
CG13284	CG13284	CG13284 gene product from transcript CG13284-RA	0.609666	7.89948	5.7798	6.44702e-06	0.000903568	3.89432
CG18343	CG18343	CG18343 gene product from transcript CG18343-RA	0.611187	12.9538	6.51666	1.09518e-06	0.000220005	5.62302
CG15170	CG15170	CG15170 gene product from transcript CG15170-RA	0.613124	4.56078	3.89974	0.000703157	0.0306124	-0.661343
CG4415	CG4415	CG4415 gene product from transcript CG4415-RA	0.614659	5.34167	3.95326	0.000615214	0.0280578	-0.532879
CG7514	CG7514	CG7514 gene product from transcript CG7514-RA	0.617874	4.30938	3.84493	0.000806096	0.0337361	-0.792565
CG9899	CG9899	CG9899 gene product from transcript CG9899-RA	0.61847	4.37824	3.69804	0.00116102	0.0433824	-1.14226
CG9503	CG9503	CG9503 gene product from transcript CG9503-RA	0.619722	8.3871	4.12963	0.000395597	0.0206799	-0.107457
CG9542	CG9542	CG9542 gene product from transcript CG9542-RA	0.623731	6.89794	4.61158	0.000117812	0.00843809	1.06495
CG1637	CG1637	CG1637 gene product from transcript CG1637-RC	0.632766	9.65392	9.13462	3.4957e-09	1.62054e-06	11.1825
CG34313	CG34313	CG34313 gene product from transcript CG34313-RA	0.635253	5.11765	6.18106	2.43742e-06	0.000431911	4.84308
CG15284	pburs	partner of burs	0.637228	6.07647	4.70292	9.36461e-05	0.0071568	1.28784
CG8083	CG8083	CG8083 gene product from transcript CG8083-RA	0.641266	5.51744	5.3069	2.06825e-05	0.0022781	2.75761
CG14567	CG14567	CG14567 gene product from transcript CG14567-RA	0.647254	8.71814	5.17394	2.87923e-05	0.00289472	2.43526
CG10311	CG10311	CG10311 gene product from transcript CG10311-RA	0.647606	7.87717	5.46649	1.39274e-05	0.00170797	3.1431
CG42514	CG42514	CG42514 gene product from transcript CG42514-RA	0.648214	11.5732	4.85211	6.43912e-05	0.00531587	1.65185
CG41284	CG41284	CG41284 gene product from transcript CG41284-RB	0.654446	7.46049	6.49598	1.1501e-06	0.00022886	5.57533
CG3848	trr	trithorax-related	0.655305	7.50931	5.8485	5.45167e-06	0.000807433	4.05791
CG3810	Edem1	CG3810 gene product from transcript CG3810-RC	0.656693	7.8444	4.77253	7.86241e-05	0.00623465	1.45772
CG31370	CG31370	CG31370 gene product from transcript CG31370-RB	0.66242	6.21457	4.35297	0.000225759	0.0137034	0.434604
CG8604	Amph	Amphiphysin	0.664357	5.98742	3.70617	0.00113788	0.0429363	-1.123
CG33772	CG33772	CG33772 gene product from transcript CG33772-RC	0.668651	4.42507	4.17382	0.000354088	0.0191507	-0.000470398
CG6503	CG6503	CG6503 gene product from transcript CG6503-RA	0.673384	4.51958	4.73792	8.57646e-05	0.00665086	1.37325
CG15917	CG15917	CG15917 gene product from transcript CG15917-RA	0.673682	5.60938	4.12078	0.000404477	0.020988	-0.128872
CG31918	CG31918	CG31918 gene product from transcript CG31918-RA	0.67374	10.4643	7.61216	8.85859e-08	2.5952e-05	8.0678
CG4781	CG4781	CG4781 gene product from transcript CG4781-RA	0.674845	4.28765	4.52165	0.000147711	0.0100022	0.845555
CG4818	Cpr72Ea	Cuticular protein 72Ea	0.675254	6.73705	3.95888	0.000606639	0.0277266	-0.519377
CG4615	CG4615	CG4615 gene product from transcript CG4615-RA	0.678769	7.94521	4.43578	0.000183318	0.0117173	0.636243
CG6447	TwdlL	TweedleL	0.684967	6.53325	3.88788	0.00072428	0.0313058	-0.689782
CG8249	CG8249	CG8249 gene product from transcript CG8249-RC	0.688441	7.97476	5.89668	4.84813e-06	0.000735696	4.17236
CG42694	CG42694	CG42694 gene product from transcript CG42694-RA	0.694284	5.56762	5.32339	1.98527e-05	0.00220396	2.79752
CG31673	CG31673	CG31673 gene product from transcript CG31673-RA	0.69438	10.7611	4.64791	0.000107529	0.00783459	1.1536
CG15258	CG15258	CG15258 gene product from transcript CG15258-RA	0.696641	5.02711	3.94357	0.000630284	0.0284986	-0.556157
CG6016	bbc	bb in a boxcar	0.698385	8.3524	3.76419	0.000985353	0.0389579	-0.985159
CG10539	S6k	RPS6-p70-protein kinase	0.70147	9.38585	5.0598	3.82812e-05	0.00362906	2.15784
CG42272	CG42272	CG42272 gene product from transcript CG42272-RC	0.702673	9.95622	6.17046	2.50026e-06	0.000433569	4.81826
CG5973	CG5973	CG5973 gene product from transcript CG5973-RA	0.702803	8.08657	4.63754	0.000110372	0.00794562	1.12828
CG7506	CG7506	CG7506 gene product from transcript CG7506-RA	0.708849	10.7217	6.52876	1.06432e-06	0.000215862	5.65087
CG32409	CG32409	CG32409 gene product from transcript CG32409-RA	0.709253	10.6642	6.39575	1.45885e-06	0.000277221	5.34356
CG3326	CG3326	CG3326 gene product from transcript CG3326-RA	0.709818	8.94396	5.67583	8.31648e-06	0.00110269	3.64596
CG43161	Skeletor	CG43161 gene product from transcript CG43161-RD	0.712171	9.64829	5.82439	5.78179e-06	0.000839873	4.00056
CG1330	Ccp84Ae	CG1330 gene product from transcript CG1330-RA	0.713791	5.3437	6.51806	1.09157e-06	0.000220005	5.62623
CG42598	CG42598	CG42598 gene product from transcript CG42598-RA	0.714283	7.3154	6.16347	2.54268e-06	0.000436039	4.80185
CG4880	CG4880	CG4880 gene product from transcript CG4880-RA	0.717746	10.2548	8.2229	2.33437e-08	8.71483e-06	9.35764
CG16705	SPE	Spatzle-Processing Enzyme	0.718265	7.10157	5.46322	1.40401e-05	0.00171436	3.13524
CG2162	CG2162	CG2162 gene product from transcript CG2162-RA	0.721951	9.11386	6.17156	2.49371e-06	0.000433569	4.82082
CG2004	CG2004	CG2004 gene product from transcript CG2004-RA	0.722979	10.7984	5.26834	2.27625e-05	0.00245591	2.66422
CG15905	CG15905	CG15905 gene product from transcript CG15905-RB	0.724841	13.6643	7.34415	1.6156e-07	4.34112e-05	7.48489
CG30016	CG30016	CG30016 gene product from transcript CG30016-RA	0.738646	7.7472	5.3834	1.7107e-05	0.00201024	2.94262
CG30291	CG30291	CG30291 gene product from transcript CG30291-RA	0.740632	11.4683	5.21869	2.57552e-05	0.00267996	2.54386
CG10091	GstD9	Glutathione S transferase D9	0.74068	11.6004	5.60952	9.78808e-06	0.0012589	3.48704
CG9212	Nipsnap	CG9212 gene product from transcript CG9212-RC	0.740915	7.15787	5.34918	1.86219e-05	0.0021232	2.8599
CG1745	HP5	Heterochromatin protein 5	0.745553	9.22502	5.46146	1.41014e-05	0.00171436	3.13099
CG9948	CG9948	CG9948 gene product from transcript CG9948-RA	0.745792	10.0285	4.89861	5.73058e-05	0.00491362	1.76522
CG1966	Acf1	ATP-dependent chromatin assembly factor large subunit	0.747875	11.2226	5.34418	1.88541e-05	0.00213239	2.84782
CG12028	dib	disembodied	0.759352	5.59305	5.51116	1.24724e-05	0.00154753	3.25069
CG10287	Gasp	CG10287 gene product from transcript CG10287-RB	0.769706	10.8108	5.8482	5.45561e-06	0.000807433	4.0572
CG3523	CG3523	CG3523 gene product from transcript CG3523-RA	0.772723	9.77354	4.26489	0.000281703	0.0159607	0.220466
CG6610	CG6610	CG6610 gene product from transcript CG6610-RA	0.77969	12.0205	5.39087	1.67935e-05	0.00197892	2.96064
CG9040	CG9040	CG9040 gene product from transcript CG9040-RA	0.780018	4.59903	3.95124	0.000618316	0.0281384	-0.537718
CG14257	CG14257	CG14257 gene product from transcript CG14257-RB	0.78004	10.4909	7.47155	1.21273e-07	3.34381e-05	7.76325
CG17527	GstE5	Glutathione S transferase E5	0.784393	8.57564	4.44951	0.000177095	0.0114487	0.669703
CG4839	CG4839	CG4839 gene product from transcript CG4839-RB	0.799355	5.46646	5.47766	1.35481e-05	0.0016663	3.17002
CG33486	asparagine-synthetase	asparagine synthetase	0.800125	6.45873	4.80279	7.28745e-05	0.00587817	1.53153
CG31100	CG31100	CG31100 gene product from transcript CG31100-RA	0.801649	6.39956	3.92051	0.000667637	0.029554	-0.61152
CG31274	CG31274	CG31274 gene product from transcript CG31274-RA	0.807158	4.79059	4.32949	0.000239487	0.01429	0.37748
CG8956	Ahcy89E	Adenosylhomocysteinase 89E	0.810008	7.56609	6.04833	3.35622e-06	0.000546662	4.5311
CG14694	CG14694	CG14694 gene product from transcript CG14694-RA	0.812225	5.07544	7.96585	4.0673e-08	1.42095e-05	8.82136
CG5164	GstE1	Glutathione S transferase E1	0.81265	10.3923	7.31279	1.73433e-07	4.5878e-05	7.41603
CG12405	Prx2540-1	Peroxiredoxin 2540-1	0.823004	9.84821	5.15057	3.05196e-05	0.00300818	2.3785
CG10112	Cpr51A	Cuticular protein 51A	0.82538	11.6936	3.93886	0.000637741	0.0287433	-0.567469
CG7916	CG7916	CG7916 gene product from transcript CG7916-RA	0.832988	5.2983	4.52294	0.000147231	0.0100017	0.848716
CG17470	CG17470	CG17470 gene product from transcript CG17470-RA	0.834976	5.50758	5.78758	6.32553e-06	0.00089247	3.91288
CG10932	CG10932	CG10932 gene product from transcript CG10932-RA	0.835753	12.1408	5.4379	1.49476e-05	0.00180165	3.07417
CG12047	mud	mushroom body defect	0.840552	6.431	10.0995	5.26502e-10	3.26633e-07	12.9847
CG6539	Gem3	Gemin3	0.842653	9.63671	6.62954	8.39311e-07	0.000175283	5.88227
CG8120	HP1e	CG8120 gene product from transcript CG8120-RA	0.844038	5.1171	5.33265	1.94013e-05	0.00216701	2.81993
CG11825	CG11825	CG11825 gene product from transcript CG11825-RB	0.853249	5.891	4.9851	4.61447e-05	0.00415953	1.97599
CG12896	CG12896	CG12896 gene product from transcript CG12896-RA	0.859413	9.19589	5.66068	8.63155e-06	0.00113791	3.60969
CG1368	CG1368	CG1368 gene product from transcript CG1368-RA	0.860873	8.34898	3.98756	0.000564661	0.0264652	-0.450372
CG7408	CG7408	CG7408 gene product from transcript CG7408-RB	0.861045	8.23565	9.32363	2.39036e-09	1.14591e-06	11.5458
CG17681	CG17681	CG17681 gene product from transcript CG17681-RA	0.86348	4.77283	5.71777	7.50375e-06	0.00101786	3.74626
CG12843	Tsp42Ei	Tetraspanin 42Ei	0.866637	7.80857	5.92799	4.49273e-06	0.000691717	4.24662
CG5144	CG5144	CG5144 gene product from transcript CG5144-RA	0.877058	5.83067	4.2734	0.000275739	0.0158199	0.241154
CG5704	CG5704	CG5704 gene product from transcript CG5704-RA	0.877539	9.57144	8.83227	6.48258e-09	2.73474e-06	10.5906
CG16799	CG16799	CG16799 gene product from transcript CG16799-RA	0.880692	5.85144	3.96892	0.000591594	0.0272997	-0.495213
CG13749	CG13749	CG13749 gene product from transcript CG13749-RB	0.889974	7.31149	3.83041	0.000835768	0.0344808	-0.82726
CG2488	phr6-4	(6-4)-photolyase	0.902092	7.26811	7.62479	8.61326e-08	2.54389e-05	8.09502
CG6579	atilla	CG6579 gene product from transcript CG6579-RB	0.91577	7.12609	4.43104	0.000185515	0.0118219	0.624703
CG11400	CG11400	CG11400 gene product from transcript CG11400-RA	0.928619	6.7934	7.31134	1.74003e-07	4.5878e-05	7.41284
CG43114	CG43114	CG43114 gene product from transcript CG43114-RA	0.953801	5.69294	3.71409	0.00111576	0.0423286	-1.1042
CG12182	CG12182	CG12182 gene product from transcript CG12182-RA	0.958136	9.10905	12.2079	1.23162e-11	1.23708e-08	16.4936
CG7367	CG7367	CG7367 gene product from transcript CG7367-RB	0.960024	9.88957	5.54913	1.13574e-05	0.00142173	3.34202
CG34278	CG34278	CG34278 gene product from transcript CG34278-RA	0.962001	6.23922	8.51704	1.25002e-08	4.92836e-06	9.95955
CG11765	Prx2540-2	Peroxiredoxin 2540-2	0.967215	8.74508	5.92835	4.48882e-06	0.000691717	4.24747
CG10067	Act57B	Actin 57B	0.968042	13.7429	10.1518	4.76771e-10	3.00195e-07	13.0786
CG8768	CG8768	CG8768 gene product from transcript CG8768-RA	0.982923	8.83305	7.71291	7.08482e-08	2.19765e-05	8.28429
CG3200	Reg-2	Rhythmically expressed gene 2	0.992789	10.29	4.63355	0.000111483	0.00801193	1.11856
CG8800	CG8800	CG8800 gene product from transcript CG8800-RA	1.00923	7.61613	3.96857	0.000592122	0.0272997	-0.496072
CG2360	Ccp84Aa	CG2360 gene product from transcript CG2360-RA	1.0173	7.48487	3.66776	0.00125138	0.0456274	-1.21396
CG11263	CG11263	CG11263 gene product from transcript CG11263-RA	1.03005	6.43731	10.6503	1.88065e-10	1.41674e-07	13.9562
CG7354	mRpS26	mitochondrial ribosomal protein S26	1.03789	10.4091	6.16713	2.52038e-06	0.000433978	4.81044
CG3492	CG3492	CG3492 gene product from transcript CG3492-RA	1.04483	5.63945	5.84086	5.55414e-06	0.000816401	4.03974
CG14485	swi2	CG14485 gene product from transcript CG14485-RA	1.04698	7.03288	5.26219	2.31129e-05	0.00248735	2.64933
CG13053	CG13053	CG13053 gene product from transcript CG13053-RA	1.07449	10.0006	5.28142	2.20342e-05	0.0024019	2.69591
CG17134	CG17134	CG17134 gene product from transcript CG17134-RA	1.10447	4.96029	4.46273	0.000171303	0.0111752	0.701921
CG11253	CG11253	CG11253 gene product from transcript CG11253-RA	1.11248	7.97216	7.28335	1.85395e-07	4.85782e-05	7.35126
CG10344	CG10344	CG10344 gene product from transcript CG10344-RA	1.11951	7.10454	6.1777	2.45718e-06	0.000431911	4.83521
CG31262	CG31262	CG31262 gene product from transcript CG31262-RB	1.12124	5.0454	5.23261	2.48783e-05	0.00261073	2.57761
CG32444	CG32444	CG32444 gene product from transcript CG32444-RA	1.12288	6.41775	4.96284	4.8788e-05	0.00432389	1.92178
CG43079	nrm	neuromusculin	1.12801	6.12251	8.01079	3.68868e-08	1.31873e-05	8.91581
CG40178	CG40178	CG40178 gene product from transcript CG40178-RA	1.14158	8.14155	10.5822	2.1317e-10	1.53452e-07	13.8383
CG13897	CG13897	CG13897 gene product from transcript CG13897-RA	1.16614	8.23502	8.14797	2.74199e-08	9.97184e-06	9.20231
CG6013	CG6013	CG6013 gene product from transcript CG6013-RA	1.18067	10.1515	9.83797	8.69483e-10	5.02466e-07	12.509
CG43117	CG43117	CG43117 gene product from transcript CG43117-RB	1.18805	7.7773	8.46234	1.40277e-08	5.37975e-06	9.84856
CG2161	Rga	Regena	1.18888	12.2015	9.01852	4.42498e-09	1.96497e-06	10.9568
CG10576	CG10576	CG10576 gene product from transcript CG10576-RA	1.21978	11.6746	9.84126	8.63973e-10	5.02466e-07	12.515
CG17077	pnt	pointed	1.26213	8.32191	9.6971	1.1432e-09	6.35058e-07	12.2489
CG7478	Act79B	Actin 79B	1.26351	10.2911	10.5486	2.26829e-10	1.59484e-07	13.7798
CG13890	CG13890	CG13890 gene product from transcript CG13890-RA	1.27737	10.0936	13.8821	8.63919e-13	1.21484e-09	18.9085
CG41320	CG41320	CG41320 gene product from transcript CG41320-RA	1.27938	9.13001	8.57928	1.09688e-08	4.36539e-06	10.0853
CG13083	CG13083	CG13083 gene product from transcript CG13083-RB	1.31002	5.00917	9.05694	4.09209e-09	1.83648e-06	11.0317
CG8023	eIF4E-3	CG8023 gene product from transcript CG8023-RA	1.34507	5.17484	9.36283	2.21045e-09	1.09706e-06	11.6206
CG33140	CG33140	CG33140 gene product from transcript CG33140-RA	1.42604	6.63869	10.1799	4.52066e-10	2.93398e-07	13.129
CG1342	Spn100A	Serpin 100A	1.44408	9.49309	5.19034	2.76394e-05	0.00282696	2.47507
CG33302	Cpr31A	Cuticular protein 31A	1.4644	6.93947	9.6967	1.14409e-09	6.35058e-07	12.2482
CG30488	CG30488	CG30488 gene product from transcript CG30488-RA	1.4655	5.46437	15.0512	1.56331e-13	2.99771e-10	20.4256
CG7160	Cpr78E	Cuticular protein 78E	1.47269	11.3126	3.74156	0.00104228	0.0405998	-1.03897
CG30104	CG30104	CG30104 gene product from transcript CG30104-RB	1.54273	5.70551	5.33492	1.92925e-05	0.00216455	2.82542
CG31810	CG31810	CG31810 gene product from transcript CG31810-RA	1.54406	6.33227	14.2219	5.19635e-13	8.11901e-10	19.3628
CG4086	Su(P)	Suppressor of ref(2)P sterility	1.58021	10.0285	9.35319	2.25336e-09	1.10535e-06	11.6022
CG3649	CG3649	CG3649 gene product from transcript CG3649-RB	1.60806	9.96037	9.48189	1.74497e-09	9.25346e-07	11.8461
CG7607	CG7607	CG7607 gene product from transcript CG7607-RA	1.61417	5.9423	10.163	4.66741e-10	2.98332e-07	13.0987
CG7532	l(2)34Fc	lethal (2) 34Fc	1.62792	11.3591	8.79772	6.96186e-09	2.90785e-06	10.5222
CG15236	CG15236	CG15236 gene product from transcript CG15236-RB	1.73993	5.22258	12.5792	6.6761e-12	7.22149e-09	17.0557
CG31809	CG31809	CG31809 gene product from transcript CG31809-RB	1.75802	6.84728	16.3318	2.71221e-14	6.95663e-11	21.9461
CG15707	krimp	krimper	1.79274	8.01914	7.92502	4.44594e-08	1.51255e-05	8.73528
CG14715	CG14715	CG14715 gene product from transcript CG14715-RA	1.83534	12.398	17.3488	7.31441e-15	2.37358e-11	23.0588
CG43103	CG43103	CG43103 gene product from transcript CG43103-RA	1.83792	8.01338	7.62427	8.62314e-08	2.54389e-05	8.09391
CG4570	CG4570	CG4570 gene product from transcript CG4570-RA	2.14555	7.42789	12.4357	8.44564e-12	8.9072e-09	16.8403
CG32364	CG32364	CG32364 gene product from transcript CG32364-RA	2.30836	10.274	15.2553	1.17303e-13	2.35646e-10	20.6773
CG9333	Oseg5	CG9333 gene product from transcript CG9333-RB	2.33816	6.28203	14.6518	2.76862e-13	4.67189e-10	19.9218
CG14394	CG14394	CG14394 gene product from transcript CG14394-RB	2.34065	8.37763	18.4407	1.92446e-15	8.11853e-12	24.1687
CG34215	CG34215	CG34215 gene product from transcript CG34215-RA	2.83172	6.72586	12.7985	4.6806e-12	5.80752e-09	17.3802
CG31436	CG31436	CG31436 gene product from transcript CG31436-RA	2.98548	8.50738	18.2503	2.41657e-15	8.49544e-12	23.9812
CG2849	Rala	Ras-related protein	3.03996	8.62267	23.0249	1.38413e-17	1.94636e-13	28.0327
CG42330	Dscam4	Down syndrome cell adhesion molecule 4	3.65926	6.95919	19.062	9.28078e-16	5.59313e-12	24.7641
CG5671	Pten	CG5671 gene product from transcript CG5671-RB	3.99948	8.40939	18.3017	2.27221e-15	8.49544e-12	24.032
CG10541	Tektin-C	Tektin C	5.1041	8.02243	23.3713	9.89572e-18	1.94636e-13	28.2804

## Sheet: Data 48h
Row	Col	ControlType	ProbeName	SystematicName	Status	gene_id	Symbol	Genename	logFC	AveExpr	t	P.Value	adj.P.Val	B
159	137	0	CUST_27031_PI428323385	CG42644	Probe	10178858	CG42644	CG42644 gene product from transcript CG42644-RA	-3.7128	5.14214	-32.246	6.5924e-21	2.78107e-16	35.1706
13	4	0	CUST_33022_PI428323385	CG5955	Probe	40268	CG5955	CG5955 gene product from transcript CG5955-RA	-2.69903	5.37307	-26.8671	4.23946e-19	8.46629e-15	32.0444
182	128	0	CUST_28221_PI428323385	CG43144	Probe	12798035	CG43144	CG43144 gene product from transcript CG43144-RB	-3.25724	8.5435	-26.455	6.02068e-19	8.46629e-15	31.7674
23	153	0	CUST_4799_PI428323385	CG12242	Probe	48338	GstD5	Glutathione S transferase D5	-4.14825	5.25695	-23.4598	9.08899e-18	9.5857e-14	29.5594
140	119	0	CUST_16064_PI428323385	CG2849	Probe	31332	Rala	Ras-related protein	2.99092	8.62267	22.6535	1.99382e-17	1.48561e-13	28.9004
165	47	0	CUST_1181_PI428323385	CG10541	Probe	38653	Tektin-C	Tektin C	4.93456	8.02243	22.5949	2.11295e-17	1.48561e-13	28.8514
222	122	0	CUST_3534_PI428323385	CG11584	Probe	32363	CG11584	CG11584 gene product from transcript CG11584-RB	-2.83906	6.7413	-22.2044	3.12301e-17	1.79203e-13	28.5202
58	52	0	CUST_16061_PI428323385	CG2849	Probe	31332	Rala	Ras-related protein	2.85788	8.66528	22.1207	3.39834e-17	1.79203e-13	28.4484
8	47	0	CUST_28222_PI428323385	CG43144	Probe	12798035	CG43144	CG43144 gene product from transcript CG43144-RB	-3.20482	8.65617	-21.834	4.55027e-17	2.13286e-13	28.1993
167	132	0	CUST_39097_PI428323385	CG8620	Probe	50310	CG8620	CG8620 gene product from transcript CG8620-RA	-3.53696	5.39723	-21.5771	5.92759e-17	2.50061e-13	27.9728
184	141	0	CUST_4800_PI428323385	CG12242	Probe	48338	GstD5	Glutathione S transferase D5	-4.05502	5.14069	-21.1788	8.98312e-17	3.44511e-13	27.6148
343	58	0	CUST_8483_PI428323385	CG14394	Probe	41568	CG14394	CG14394 gene product from transcript CG14394-RB	2.63475	8.37763	20.7578	1.40503e-16	4.93939e-13	27.2273
24	105	0	CUST_33021_PI428323385	CG5955	Probe	40268	CG5955	CG5955 gene product from transcript CG5955-RA	-3.35938	4.98688	-20.4546	1.94869e-16	6.32365e-13	26.9423
194	10	0	CUST_39099_PI428323385	CG8620	Probe	50310	CG8620	CG8620 gene product from transcript CG8620-RA	-3.215	5.24726	-20.0625	2.99472e-16	8.39965e-13	26.5661
24	56	0	CUST_11076_PI428323385	CG15892	Probe	3772603	CG15892	CG15892 gene product from transcript CG15892-RB	-1.91104	6.12757	-20.0166	3.1505e-16	8.39965e-13	26.5216
296	93	0	CUST_26169_PI428323385	CG42330	Probe	2769008	Dscam4	Down syndrome cell adhesion molecule 4	3.84058	6.95919	20.0066	3.18576e-16	8.39965e-13	26.5118
71	52	0	CUST_16063_PI428323385	CG2849	Probe	31332	Rala	Ras-related protein	2.95674	8.55139	19.8539	3.77521e-16	9.36829e-13	26.3625
174	22	0	CUST_12696_PI428323385	CG17530	Probe	37111	GstE6	Glutathione S transferase E6	-3.53278	8.94386	-18.7776	1.29244e-15	3.02906e-12	25.2703
172	164	0	CUST_16062_PI428323385	CG2849	Probe	31332	Rala	Ras-related protein	2.82847	8.5146	18.4945	1.8052e-15	4.00811e-12	24.971
379	95	0	CUST_32390_PI428323385	CG5671	Probe	43991	Pten	CG5671 gene product from transcript CG5671-RB	4.00127	8.40939	18.3098	2.25006e-15	4.74604e-12	24.773
281	3	0	CUST_17932_PI428323385	CG31279	Probe	318657	CG31279	CG31279 gene product from transcript CG31279-RB	-2.49664	5.51031	-18.0574	3.0506e-15	5.94725e-12	24.4987
279	94	0	CUST_17936_PI428323385	CG31279	Probe	318657	CG31279	CG31279 gene product from transcript CG31279-RB	-2.58425	5.65784	-18.0437	3.10149e-15	5.94725e-12	24.4837
257	129	0	CUST_9907_PI428323385	CG1512	Probe	35420	Cul-2	Cullin-2	-1.52967	11.7526	-17.9932	3.29805e-15	6.0492e-12	24.4282
339	59	0	CUST_8487_PI428323385	CG14394	Probe	41568	CG14394	CG14394 gene product from transcript CG14394-RB	2.58558	8.31709	17.876	3.80488e-15	6.68803e-12	24.299
254	124	0	CUST_1182_PI428323385	CG10541	Probe	38653	Tektin-C	Tektin C	4.92604	7.86789	17.549	5.69573e-15	9.6112e-12	23.9331
14	64	0	CUST_9908_PI428323385	CG1512	Probe	35420	Cul-2	Cullin-2	-1.55811	11.3119	-17.2842	7.93332e-15	1.28721e-11	23.6314
264	123	0	CUST_12695_PI428323385	CG17530	Probe	37111	GstE6	Glutathione S transferase E6	-3.44887	8.99247	-17.0801	1.02731e-14	1.60511e-11	23.3954
228	95	0	CUST_10919_PI428323385	CG15784	Probe	31461	CG15784	CG15784 gene product from transcript CG15784-RA	-3.97835	8.78475	-16.8576	1.36583e-14	2.05782e-11	23.1346
285	99	0	CUST_8489_PI428323385	CG14394	Probe	41568	CG14394	CG14394 gene product from transcript CG14394-RB	1.64807	6.01602	16.7583	1.55263e-14	2.21114e-11	23.017
273	98	0	CUST_30069_PI428323385	CG4594	Probe	34316	CG4594	CG4594 gene product from transcript CG4594-RA	-3.06351	8.21672	-16.7485	1.57242e-14	2.21114e-11	23.0053
157	41	0	CUST_8488_PI428323385	CG14394	Probe	41568	CG14394	CG14394 gene product from transcript CG14394-RB	2.47235	8.1707	16.4941	2.19021e-14	2.98052e-11	22.7006
139	149	0	CUST_39098_PI428323385	CG8620	Probe	50310	CG8620	CG8620 gene product from transcript CG8620-RA	-3.41263	5.3221	-16.4141	2.43291e-14	3.20733e-11	22.6037
98	95	0	CUST_20493_PI428323385	CG32625	Probe	318128	CG32625	CG32625 gene product from transcript CG32625-RA	-3.04219	6.25207	-16.2023	3.22026e-14	4.11666e-11	22.3449
178	155	0	CUST_2481_PI428323385	CG11086	Probe	35646	Gadd45	CG11086 gene product from transcript CG11086-RA	-2.05785	8.30806	-15.8995	4.83479e-14	5.85584e-11	21.9686
188	152	0	CUST_18159_PI428323385	CG31436	Probe	318734	CG31436	CG31436 gene product from transcript CG31436-RA	2.60033	8.50738	15.8959	4.85835e-14	5.85584e-11	21.9641
195	157	0	CUST_14394_PI428323385	CG18522	Probe	41894	CG18522	CG18522 gene product from transcript CG18522-RA	-3.81607	6.47912	-15.8547	5.13687e-14	5.97361e-11	21.9123
125	101	0	CUST_20800_PI428323385	CG32788	Probe	43900	Crg-1	Circadianly Regulated Gene	-1.88834	5.79583	-15.836	5.26906e-14	5.97361e-11	21.8887
52	164	0	CUST_9080_PI428323385	CG14715	Probe	41403	CG14715	CG14715 gene product from transcript CG14715-RA	1.67367	12.398	15.8205	5.38087e-14	5.97361e-11	21.8692
55	130	0	CUST_26321_PI428323385	CG42352	Probe	35449	Ir40a	Ionotropic receptor 40a	-2.0153	5.47803	-15.4175	9.35651e-14	1.01209e-10	21.3543
1	87	0	CUST_26174_PI428323385	CG42330	Probe	2769008	Dscam4	Down syndrome cell adhesion molecule 4	2.87029	6.51437	15.3279	1.05989e-13	1.1061e-10	21.2379
241	22	0	CUST_26322_PI428323385	CG42352	Probe	35449	Ir40a	Ionotropic receptor 40a	-1.9973	5.31614	-15.3177	1.075e-13	1.1061e-10	21.2247
382	95	0	CUST_32388_PI428323385	CG5671	Probe	43991	Pten	CG5671 gene product from transcript CG5671-RB	3.89003	8.42609	15.2198	1.23287e-13	1.23833e-10	21.0966
56	159	0	CUST_4727_PI428323385	CG1221	Probe	38047	miple	CG1221 gene product from transcript CG1221-RA	-1.26043	11.7684	-15.0625	1.53856e-13	1.50659e-10	20.8893
150	150	0	CUST_2482_PI428323385	CG11086	Probe	35646	Gadd45	CG11086 gene product from transcript CG11086-RA	-2.08642	8.18818	-15.0424	1.58304e-13	1.50659e-10	20.8626
102	77	0	CUST_26170_PI428323385	CG42330	Probe	2769008	Dscam4	Down syndrome cell adhesion molecule 4	3.02294	6.48281	15.0317	1.60709e-13	1.50659e-10	20.8485
100	27	0	CUST_14393_PI428323385	CG18522	Probe	41894	CG18522	CG18522 gene product from transcript CG18522-RA	-3.47236	6.47023	-14.8301	2.1418e-13	1.9523e-10	20.5791
323	16	0	CUST_9079_PI428323385	CG14715	Probe	41403	CG14715	CG14715 gene product from transcript CG14715-RA	1.68341	12.0964	14.8194	2.17508e-13	1.9523e-10	20.5646
89	26	0	CUST_8769_PI428323385	CG14545	Probe	50075	CG14545	CG14545 gene product from transcript CG14545-RA	-1.84948	5.40945	-14.7187	2.51393e-13	2.20943e-10	20.4285
257	127	0	CUST_18836_PI428323385	CG31809	Probe	318954	CG31809	CG31809 gene product from transcript CG31809-RB	1.57102	6.84728	14.5946	3.00813e-13	2.57313e-10	20.2596
209	120	0	CUST_39100_PI428323385	CG8620	Probe	50310	CG8620	CG8620 gene product from transcript CG8620-RA	-2.92637	5.31981	-14.5851	3.04974e-13	2.57313e-10	20.2467
250	25	0	CUST_24449_PI428323385	CG3767	Probe	36819	JhI-26	Juvenile hormone-inducible protein 26	-2.23102	4.89488	-14.4458	3.73637e-13	3.0597e-10	20.0553
113	55	0	CUST_555_PI428323385	CG10245	Probe	36664	Cyp6a20	CG10245 gene product from transcript CG10245-RB	-1.89907	5.0635	-14.4394	3.7715e-13	3.0597e-10	20.0465
5	63	0	CUST_26173_PI428323385	CG42330	Probe	2769008	Dscam4	Down syndrome cell adhesion molecule 4	3.63219	7.06336	14.3455	4.32899e-13	3.44571e-10	19.9164
105	70	0	CUST_8770_PI428323385	CG14545	Probe	50075	CG14545	CG14545 gene product from transcript CG14545-RA	-1.84972	5.44207	-14.3041	4.60174e-13	3.59498e-10	19.8587
342	112	0	CUST_3532_PI428323385	CG11584	Probe	32363	CG11584	CG11584 gene product from transcript CG11584-RB	-2.42594	6.80578	-14.2736	4.81359e-13	3.69211e-10	19.8162
33	16	0	CUST_17170_PI428323385	CG30488	Probe	246647	CG30488	CG30488 gene product from transcript CG30488-RA	1.37205	5.46437	14.0915	6.30806e-13	4.752e-10	19.5604
225	147	0	CUST_22495_PI428323385	CG3397	Probe	41454	CG3397	CG3397 gene product from transcript CG3397-RA	-2.20077	8.35543	-13.932	8.0128e-13	5.84969e-10	19.3338
112	11	0	CUST_17935_PI428323385	CG31279	Probe	318657	CG31279	CG31279 gene product from transcript CG31279-RB	-2.49368	5.85233	-13.9296	8.04253e-13	5.84969e-10	19.3303
158	119	0	CUST_8486_PI428323385	CG14394	Probe	41568	CG14394	CG14394 gene product from transcript CG14394-RB	1.69098	7.16497	13.8495	9.07604e-13	6.48952e-10	19.2156
177	33	0	CUST_16107_PI428323385	CG2885	Probe	31971	RabX2	CG2885 gene product from transcript CG2885-RA	-2.132	4.76055	-13.8329	9.30681e-13	6.54362e-10	19.1917
89	70	0	CUST_17168_PI428323385	CG30488	Probe	246647	CG30488	CG30488 gene product from transcript CG30488-RA	1.51472	5.55649	13.7466	1.06102e-12	7.3377e-10	19.0673
88	11	0	CUST_4728_PI428323385	CG1221	Probe	38047	miple	CG1221 gene product from transcript CG1221-RA	-1.25136	11.6595	-13.707	1.12709e-12	7.66892e-10	19.0099
15	58	0	CUST_4672_PI428323385	CG12182	Probe	38324	CG12182	CG12182 gene product from transcript CG12182-RA	1.07273	9.10905	13.668	1.19638e-12	8.01118e-10	18.9531
234	36	0	CUST_34532_PI428323385	CG6658	Probe	53502	Ugt86Di	CG6658 gene product from transcript CG6658-RA	-1.52754	10.07	-13.4299	1.72628e-12	1.13789e-09	18.6041
217	5	0	CUST_16108_PI428323385	CG2885	Probe	31971	RabX2	CG2885 gene product from transcript CG2885-RA	-2.01998	4.788	-13.3177	2.05531e-12	1.33393e-09	18.4377
316	61	0	CUST_34550_PI428323385	CG6665	Probe	36903	CG6665	CG6665 gene product from transcript CG6665-RA	-1.40187	8.4271	-13.2111	2.42866e-12	1.55236e-09	18.2783
171	13	0	CUST_40663_PI428323385	CG9333	Probe	35349	Oseg5	CG9333 gene product from transcript CG9333-RB	2.41915	6.30981	13.1067	2.8629e-12	1.8026e-09	18.1211
107	54	0	CUST_29045_PI428323385	CG43676	Probe	NA	NA	NA	-1.55155	4.73583	-12.8745	4.14274e-12	2.57009e-09	17.7674
379	110	0	CUST_17258_PI428323385	CG3081	Probe	31395	CG3081	CG3081 gene product from transcript CG3081-RA	-2.54516	6.07874	-12.861	4.23351e-12	2.58833e-09	17.7466
249	3	0	CUST_18835_PI428323385	CG31809	Probe	318954	CG31809	CG31809 gene product from transcript CG31809-RB	1.36427	6.64584	12.8388	4.3865e-12	2.64355e-09	17.7126
167	91	0	CUST_23018_PI428323385	CG34215	Probe	5740170	CG34215	CG34215 gene product from transcript CG34215-RA	2.87241	6.64645	12.7438	5.11169e-12	3.03721e-09	17.5659
203	132	0	CUST_12699_PI428323385	CG17533	Probe	37113	GstE8	Glutathione S transferase E8	-2.02986	8.6557	-12.6756	5.70804e-12	3.34444e-09	17.4599
329	85	0	CUST_29746_PI428323385	CG4423	Probe	48339	GstD6	Glutathione S transferase D6	-1.84794	4.89751	-12.6411	6.03628e-12	3.45065e-09	17.4063
163	62	0	CUST_22913_PI428323385	CG34165	Probe	5740685	CG34165	CG34165 gene product from transcript CG34165-RA	-1.22906	6.08339	-12.6395	6.05292e-12	3.45065e-09	17.4036
296	47	0	CUST_5237_PI428323385	CG12505	Probe	36595	Arc1	Activity-regulated cytoskeleton associated protein 1	-3.90902	9.27493	-12.4951	7.6603e-12	4.30877e-09	17.1773
57	77	0	CUST_23815_PI428323385	CG3448	Probe	39094	CG3448	CG3448 gene product from transcript CG3448-RB	-1.40788	9.3456	-12.4796	7.85758e-12	4.36157e-09	17.1528
311	18	0	CUST_40664_PI428323385	CG9333	Probe	35349	Oseg5	CG9333 gene product from transcript CG9333-RB	1.97862	6.28203	12.3989	8.97345e-12	4.91628e-09	17.025
217	23	0	CUST_13909_PI428323385	CG18188	Probe	36266	Damm	Death associated molecule related to Mch2	-1.88556	6.02327	-12.3444	9.81748e-12	5.28152e-09	16.9385
92	132	0	CUST_14383_PI428323385	CG1851	Probe	44750	Ady43A	CG1851 gene product from transcript CG1851-RA	-1.1359	9.8512	-12.3399	9.89049e-12	5.28152e-09	16.9314
158	110	0	CUST_8490_PI428323385	CG14394	Probe	41568	CG14394	CG14394 gene product from transcript CG14394-RB	1.9013	6.11705	12.2503	1.14758e-11	6.0515e-09	16.7881
238	28	0	CUST_5238_PI428323385	CG12505	Probe	36595	Arc1	Activity-regulated cytoskeleton associated protein 1	-3.84049	8.89479	-12.2125	1.22204e-11	6.36455e-09	16.7275
40	38	0	CUST_16163_PI428323385	CG2914	Probe	33229	Ets21C	Ets at 21C	-1.1216	5.50428	-12.1444	1.3693e-11	7.0119e-09	16.6178
3	6	0	CUST_22142_PI428323385	CG33653	Probe	49968	Caps	Calcium activated protein for secretion	-1.76689	6.0071	-12.14	1.37958e-11	7.0119e-09	16.6106
19	100	0	CUST_31217_PI428323385	CG5096	Probe	34410	CG5096	CG5096 gene product from transcript CG5096-RA	-2.25535	6.73261	-12.1305	1.40168e-11	7.03943e-09	16.5952
291	164	0	CUST_4765_PI428323385	CG12224	Probe	41453	CG12224	CG12224 gene product from transcript CG12224-RB	-2.1786	8.99589	-12.1176	1.43234e-11	7.10878e-09	16.5744
180	61	0	CUST_5028_PI428323385	CG12367	Probe	36301	Hen1	CG12367 gene product from transcript CG12367-RA	-1.4499	6.14194	-12.0941	1.48972e-11	7.16067e-09	16.5365
105	146	0	CUST_18839_PI428323385	CG31810	Probe	318955	CG31810	CG31810 gene product from transcript CG31810-RA	1.31291	6.33227	12.0928	1.49306e-11	7.16067e-09	16.5343
262	48	0	CUST_29046_PI428323385	CG43676	Probe	NA	NA	NA	-1.44286	4.7585	-12.0926	1.49372e-11	7.16067e-09	16.5339
220	69	0	CUST_17931_PI428323385	CG31279	Probe	318657	CG31279	CG31279 gene product from transcript CG31279-RB	-2.57151	5.88981	-12.039	1.63438e-11	7.71858e-09	16.447
222	18	0	CUST_22914_PI428323385	CG34165	Probe	5740685	CG34165	CG34165 gene product from transcript CG34165-RA	-1.0467	6.15974	-12.0346	1.64669e-11	7.71858e-09	16.4397
234	24	0	CUST_20117_PI428323385	CG32475	Probe	38013	mthl8	methuselah-like 8	-1.65347	7.48996	-12.0217	1.68287e-11	7.80147e-09	16.4188
36	49	0	CUST_19857_PI428323385	CG32364	Probe	317996	CG32364	CG32364 gene product from transcript CG32364-RA	1.81429	10.274	11.9901	1.77496e-11	8.13896e-09	16.3673
38	126	0	CUST_38982_PI428323385	CG8573	Probe	41740	su(Hw)	suppressor of Hairy wing	-1.0237	11.1248	-11.9228	1.98936e-11	9.02398e-09	16.2571
76	22	0	CUST_23017_PI428323385	CG34215	Probe	5740170	CG34215	CG34215 gene product from transcript CG34215-RA	2.61829	6.72586	11.8338	2.31447e-11	1.03871e-08	16.1107
2	122	0	CUST_4674_PI428323385	CG12182	Probe	38324	CG12182	CG12182 gene product from transcript CG12182-RA	1.05403	9.12498	11.7712	2.57577e-11	1.14381e-08	16.0072
366	151	0	CUST_20799_PI428323385	CG32788	Probe	43900	Crg-1	Circadianly Regulated Gene	-1.983	5.64397	-11.7584	2.633e-11	1.15704e-08	15.9859
189	23	0	CUST_8482_PI428323385	CG14394	Probe	41568	CG14394	CG14394 gene product from transcript CG14394-RB	1.84087	6.2977	11.7244	2.79136e-11	1.21398e-08	15.9294
260	103	0	CUST_39759_PI428323385	CG8927	Probe	41964	CG8927	CG8927 gene product from transcript CG8927-RA	-2.11045	6.91503	-11.6761	3.03321e-11	1.29386e-08	15.8489
89	30	0	CUST_2221_PI428323385	CG10965	Probe	31764	Corp	Companion of reaper	-1.03588	5.84445	-11.6754	3.03637e-11	1.29386e-08	15.8479
245	77	0	CUST_8484_PI428323385	CG14394	Probe	41568	CG14394	CG14394 gene product from transcript CG14394-RB	2.5801	8.37146	11.6527	3.15788e-11	1.33218e-08	15.8099
53	70	0	CUST_7499_PI428323385	CG13890	Probe	38100	CG13890	CG13890 gene product from transcript CG13890-RA	1.06847	10.0936	11.6118	3.38883e-11	1.41546e-08	15.7415
47	132	0	CUST_13910_PI428323385	CG18188	Probe	36266	Damm	Death associated molecule related to Mch2	-1.7104	6.08998	-11.5851	3.54939e-11	1.46799e-08	15.6967
265	4	0	CUST_25538_PI428323385	CG4181	Probe	48335	GstD2	Glutathione S transferase D2	-2.46389	6.06438	-11.5466	3.79457e-11	1.55415e-08	15.6319
216	120	0	CUST_21262_PI428323385	CG33140	Probe	35642	CG33140	CG33140 gene product from transcript CG33140-RA	1.61292	6.63869	11.514	4.01565e-11	1.62889e-08	15.577
68	36	0	CUST_26171_PI428323385	CG42330	Probe	2769008	Dscam4	Down syndrome cell adhesion molecule 4	1.68148	5.31233	11.4931	4.16404e-11	1.67299e-08	15.5418
51	37	0	CUST_4766_PI428323385	CG12224	Probe	41453	CG12224	CG12224 gene product from transcript CG12224-RB	-2.2049	8.96426	-11.3004	5.83728e-11	2.3062e-08	15.2138
160	55	0	CUST_17933_PI428323385	CG31279	Probe	318657	CG31279	CG31279 gene product from transcript CG31279-RB	-1.39838	4.98434	-11.2992	5.84941e-11	2.3062e-08	15.2118
89	147	0	CUST_8480_PI428323385	CG14394	Probe	41568	CG14394	CG14394 gene product from transcript CG14394-RB	1.50697	6.04481	11.218	6.7523e-11	2.60582e-08	15.0723
128	162	0	CUST_34531_PI428323385	CG6658	Probe	53502	Ugt86Di	CG6658 gene product from transcript CG6658-RA	-1.38211	9.24573	-11.2152	6.78677e-11	2.60582e-08	15.0674
11	155	0	CUST_31218_PI428323385	CG5096	Probe	34410	CG5096	CG5096 gene product from transcript CG5096-RA	-2.08326	6.31108	-11.2145	6.79468e-11	2.60582e-08	15.0662
90	49	0	CUST_39760_PI428323385	CG8927	Probe	41964	CG8927	CG8927 gene product from transcript CG8927-RA	-1.71286	7.39074	-11.1696	7.35861e-11	2.79667e-08	14.9887
308	86	0	CUST_5737_PI428323385	CG12846	Probe	35613	Tsp42Ed	Tetraspanin 42Ed	-1.94518	5.72172	-11.1576	7.51736e-11	2.82313e-08	14.9679
40	93	0	CUST_25527_PI428323385	CG4174	Probe	40023	CG4174	CG4174 gene product from transcript CG4174-RB	-1.55269	5.26422	-11.1516	7.59801e-11	2.82313e-08	14.9576
114	141	0	CUST_2222_PI428323385	CG10965	Probe	31764	Corp	Companion of reaper	-0.97993	5.86332	-11.1493	7.629e-11	2.82313e-08	14.9536
175	119	0	CUST_23816_PI428323385	CG3448	Probe	39094	CG3448	CG3448 gene product from transcript CG3448-RB	-1.14054	7.13171	-11.0332	9.38758e-11	3.44369e-08	14.7517
261	46	0	CUST_7840_PI428323385	CG14059	Probe	39909	CG14059	CG14059 gene product from transcript CG14059-RB	-4.54624	6.35272	-11.011	9.76957e-11	3.55292e-08	14.7129
267	29	0	CUST_8481_PI428323385	CG14394	Probe	41568	CG14394	CG14394 gene product from transcript CG14394-RB	1.94747	6.33519	10.9598	1.07104e-10	3.8618e-08	14.6233
358	1	0	CUST_25530_PI428323385	CG4174	Probe	40023	CG4174	CG4174 gene product from transcript CG4174-RB	-1.25119	5.39563	-10.9186	1.15365e-10	4.12438e-08	14.5509
299	96	0	CUST_25021_PI428323385	CG40178	Probe	3354941	CG40178	CG40178 gene product from transcript CG40178-RA	1.17106	8.14155	10.8554	1.29341e-10	4.58519e-08	14.4395
164	27	0	CUST_5738_PI428323385	CG12846	Probe	35613	Tsp42Ed	Tetraspanin 42Ed	-1.97431	5.9715	-10.8315	1.35091e-10	4.73903e-08	14.3971
103	141	0	CUST_34879_PI428323385	CG6794	Probe	35045	Dif	Dorsal-related immunity factor	-1.95639	7.63123	-10.8281	1.35927e-10	4.73903e-08	14.3911
347	38	0	CUST_36472_PI428323385	CG7478	Probe	40444	Act79B	Actin 79B	1.28614	10.2911	10.7375	1.60299e-10	5.54294e-08	14.2302
108	158	0	CUST_14749_PI428323385	CG18859	Probe	59214	Or19a	Odorant receptor 19a	-2.1432	4.94979	-10.7078	1.69237e-10	5.80442e-08	14.1772
365	110	0	CUST_22149_PI428323385	CG33653	Probe	49968	Caps	Calcium activated protein for secretion	-1.81923	6.4832	-10.6949	1.73293e-10	5.89561e-08	14.1541
23	4	0	CUST_41533_PI428323385	CG9733	Probe	43601	CG9733	CG9733 gene product from transcript CG9733-RA	-0.912531	7.92228	-10.6895	1.75031e-10	5.90709e-08	14.1444
307	60	0	CUST_36310_PI428323385	CG7408	Probe	39991	CG7408	CG7408 gene product from transcript CG7408-RB	0.985957	8.23565	10.6762	1.79328e-10	6.00408e-08	14.1207
83	36	0	CUST_6148_PI428323385	CG13083	Probe	35230	CG13083	CG13083 gene product from transcript CG13083-RB	1.54249	5.00917	10.6641	1.83351e-10	6.09043e-08	14.099
371	163	0	CUST_22496_PI428323385	CG3397	Probe	41454	CG3397	CG3397 gene product from transcript CG3397-RA	-2.14673	8.30652	-10.6538	1.8687e-10	6.15883e-08	14.0805
167	95	0	CUST_9053_PI428323385	CG14695	Probe	41314	CG14695	CG14695 gene product from transcript CG14695-RA	-1.46373	4.56871	-10.6165	2.00131e-10	6.54476e-08	14.0135
316	142	0	CUST_30010_PI428323385	CG4570	Probe	41306	CG4570	CG4570 gene product from transcript CG4570-RA	1.82341	7.42789	10.5685	2.18626e-10	7.0946e-08	13.9272
375	144	0	CUST_7839_PI428323385	CG14059	Probe	39909	CG14059	CG14059 gene product from transcript CG14059-RB	-4.79868	6.30786	-10.5587	2.22625e-10	7.16919e-08	13.9095
65	157	0	CUST_18160_PI428323385	CG31436	Probe	318734	CG31436	CG31436 gene product from transcript CG31436-RA	1.61701	6.60368	10.5071	2.44925e-10	7.82758e-08	13.8162
319	126	0	CUST_25532_PI428323385	CG4174	Probe	40023	CG4174	CG4174 gene product from transcript CG4174-RB	-1.19242	5.26999	-10.4969	2.49617e-10	7.91188e-08	13.7976
62	49	0	CUST_14750_PI428323385	CG18859	Probe	59214	Or19a	Odorant receptor 19a	-2.00801	5.00639	-10.4932	2.51314e-10	7.91188e-08	13.791
95	120	0	CUST_25528_PI428323385	CG4174	Probe	40023	CG4174	CG4174 gene product from transcript CG4174-RB	-1.29908	5.13903	-10.4593	2.67675e-10	8.36453e-08	13.7293
164	147	0	CUST_9425_PI428323385	CG14907	Probe	42031	CG14907	CG14907 gene product from transcript CG14907-RB	-1.21848	8.36382	-10.4111	2.92789e-10	9.08207e-08	13.6416
168	39	0	CUST_21963_PI428323385	CG33542	Probe	3346149	upd3	unpaired 3	-0.956283	4.92385	-10.3652	3.18994e-10	9.80243e-08	13.5578
150	39	0	CUST_14420_PI428323385	CG18543	Probe	38958	mtrm	matrimony	-1.03374	6.18051	-10.3624	3.2066e-10	9.80243e-08	13.5527
143	106	0	CUST_25265_PI428323385	CG4086	Probe	39856	Su(P)	Suppressor of ref(2)P sterility	1.74487	10.0285	10.3278	3.42108e-10	1.03828e-07	13.4893
352	27	0	CUST_4673_PI428323385	CG12182	Probe	38324	CG12182	CG12182 gene product from transcript CG12182-RA	0.908707	10.2894	10.3212	3.46391e-10	1.04378e-07	13.4772
115	93	0	CUST_9054_PI428323385	CG14695	Probe	41314	CG14695	CG14695 gene product from transcript CG14695-RA	-1.3609	4.61261	-10.2699	3.81416e-10	1.14116e-07	13.3829
65	109	0	CUST_17169_PI428323385	CG30488	Probe	246647	CG30488	CG30488 gene product from transcript CG30488-RA	1.2983	5.68864	10.2624	3.86872e-10	1.14934e-07	13.369
111	43	0	CUST_31489_PI428323385	CG5229	Probe	43928	chm	chameau	-2.12436	6.31206	-10.2562	3.91372e-10	1.15457e-07	13.3576
334	74	0	CUST_22150_PI428323385	CG33653	Probe	49968	Caps	Calcium activated protein for secretion	-1.77445	5.89724	-10.2493	3.96514e-10	1.16162e-07	13.3449
5	131	0	CUST_35466_PI428323385	CG7035	Probe	44409	Cbp80	cap binding protein 80	-1.16815	10.8557	-10.1958	4.38643e-10	1.27618e-07	13.246
41	139	0	CUST_39487_PI428323385	CG8799	Probe	47905	l(2)03659	lethal (2) 03659	-1.5567	6.61524	-10.1909	4.42681e-10	1.27911e-07	13.237
242	157	0	CUST_22146_PI428323385	CG33653	Probe	49968	Caps	Calcium activated protein for secretion	-1.68874	5.87387	-10.1625	4.67214e-10	1.34081e-07	13.1841
182	147	0	CUST_22147_PI428323385	CG33653	Probe	49968	Caps	Calcium activated protein for secretion	-1.78457	6.38077	-10.1459	4.82107e-10	1.3742e-07	13.1534
338	70	0	CUST_4671_PI428323385	CG12182	Probe	38324	CG12182	CG12182 gene product from transcript CG12182-RA	0.851227	10.3021	10.1095	5.16641e-10	1.46275e-07	13.0856
9	132	0	CUST_20894_PI428323385	CG32825	Probe	260693	Or19b	Odorant receptor 19b	-1.75673	4.93839	-10.0643	5.63015e-10	1.58342e-07	13.0013
176	89	0	CUST_27032_PI428323385	CG42644	Probe	10178858	CG42644	CG42644 gene product from transcript CG42644-RA	-2.78112	5.15219	-10.05	5.78553e-10	1.61635e-07	12.9747
8	114	0	CUST_35138_PI428323385	CG6912	Probe	41820	CG6912	CG6912 gene product from transcript CG6912-RA	-1.86979	9.51014	-10.0407	5.88921e-10	1.62582e-07	12.9572
214	49	0	CUST_11961_PI428323385	CG17104	Probe	34465	CG17104	CG17104 gene product from transcript CG17104-RA	-1.08678	8.16661	-10.0401	5.89652e-10	1.62582e-07	12.956
262	120	0	CUST_5824_PI428323385	CG12908	Probe	36089	Ndg	Nidogen/entactin	-1.25847	4.84544	-10.0201	6.12642e-10	1.67824e-07	12.9185
60	154	0	CUST_5030_PI428323385	CG12367	Probe	36301	Hen1	CG12367 gene product from transcript CG12367-RA	-1.13781	6.11424	-9.91772	7.45502e-10	2.02902e-07	12.726
274	90	0	CUST_14384_PI428323385	CG1851	Probe	44750	Ady43A	CG1851 gene product from transcript CG1851-RA	-1.12818	9.1047	-9.86356	8.2753e-10	2.23783e-07	12.6235
52	76	0	CUST_124_PI428323385	CG10067	Probe	37368	Act57B	Actin 57B	0.938588	13.7429	9.84288	8.61274e-10	2.31425e-07	12.5843
297	75	0	CUST_35137_PI428323385	CG6912	Probe	41820	CG6912	CG6912 gene product from transcript CG6912-RA	-1.84375	9.93502	-9.81088	9.16301e-10	2.44652e-07	12.5235
168	114	0	CUST_22148_PI428323385	CG33653	Probe	49968	Caps	Calcium activated protein for secretion	-1.67811	5.93525	-9.76542	1.00078e-09	2.65529e-07	12.4368
123	39	0	CUST_36751_PI428323385	CG7607	Probe	39263	CG7607	CG7607 gene product from transcript CG7607-RA	1.54492	5.9423	9.72696	1.07855e-09	2.84373e-07	12.3633
164	110	0	CUST_37606_PI428323385	CG8023	Probe	38923	eIF4E-3	CG8023 gene product from transcript CG8023-RA	1.39088	5.17484	9.68172	1.17805e-09	3.08679e-07	12.2766
226	5	0	CUST_22145_PI428323385	CG33653	Probe	49968	Caps	Calcium activated protein for secretion	-1.83425	6.3583	-9.66313	1.22164e-09	3.18123e-07	12.2409
27	148	0	CUST_26172_PI428323385	CG42330	Probe	2769008	Dscam4	Down syndrome cell adhesion molecule 4	1.88133	5.36074	9.64439	1.26728e-09	3.27985e-07	12.2049
141	10	0	CUST_10112_PI428323385	CG15236	Probe	35595	CG15236	CG15236 gene product from transcript CG15236-RB	1.32926	5.22258	9.61019	1.35514e-09	3.48586e-07	12.139
28	120	0	CUST_28987_PI428323385	CG43646	Probe	NA	NA	NA	-1.50288	5.50801	-9.60425	1.37105e-09	3.50541e-07	12.1275
251	122	0	CUST_28100_PI428323385	CG43117	Probe	12798272	CG43117	CG43117 gene product from transcript CG43117-RB	1.3447	7.7773	9.57812	1.44327e-09	3.66783e-07	12.077
119	117	0	CUST_16151_PI428323385	CG2909	Probe	31958	CG2909	CG2909 gene product from transcript CG2909-RA	-1.2686	6.75237	-9.56488	1.48135e-09	3.74206e-07	12.0514
97	31	0	CUST_16166_PI428323385	CG2914	Probe	33229	Ets21C	Ets at 21C	-0.933001	5.56915	-9.55306	1.51624e-09	3.80738e-07	12.0285
78	104	0	CUST_39757_PI428323385	CG8927	Probe	41964	CG8927	CG8927 gene product from transcript CG8927-RA	-2.06673	6.93452	-9.49376	1.70446e-09	4.2547e-07	11.9134
72	30	0	CUST_17488_PI428323385	CG31062	Probe	43300	side	sidestep	-1.19131	5.06354	-9.48885	1.72111e-09	4.27098e-07	11.9038
13	10	0	CUST_16855_PI428323385	CG30330	Probe	117343	Gr59d	Gustatory receptor 59d	-0.969429	4.40315	-9.39517	2.07257e-09	5.11306e-07	11.721
83	56	0	CUST_14300_PI428323385	CG18455	Probe	44108	Optix	CG18455 gene product from transcript CG18455-RA	-1.17167	6.134	-9.37104	2.17457e-09	5.33352e-07	11.6737
14	126	0	CUST_33271_PI428323385	CG6084	Probe	39304	CG6084	CG6084 gene product from transcript CG6084-RB	-0.805138	11.8177	-9.32204	2.39801e-09	5.82895e-07	11.5774
323	145	0	CUST_1252_PI428323385	CG10576	Probe	38645	CG10576	CG10576 gene product from transcript CG10576-RA	1.15526	11.6746	9.32075	2.40421e-09	5.82895e-07	11.5748
5	149	0	CUST_9426_PI428323385	CG14907	Probe	42031	CG14907	CG14907 gene product from transcript CG14907-RB	-1.17522	9.03583	-9.24546	2.79571e-09	6.73941e-07	11.4262
264	103	0	CUST_36309_PI428323385	CG7408	Probe	39991	CG7408	CG7408 gene product from transcript CG7408-RB	0.887441	7.53627	9.2099	3.00293e-09	7.19781e-07	11.3558
207	28	0	CUST_9488_PI428323385	CG14945	Probe	34623	CG14945	CG14945 gene product from transcript CG14945-RB	-0.983197	6.62963	-9.16759	3.27036e-09	7.79455e-07	11.2717
211	30	0	CUST_22144_PI428323385	CG33653	Probe	49968	Caps	Calcium activated protein for secretion	-1.86656	5.77999	-9.11496	3.6376e-09	8.62111e-07	11.1668
166	32	0	CUST_8485_PI428323385	CG14394	Probe	41568	CG14394	CG14394 gene product from transcript CG14394-RB	1.43129	7.34024	9.10289	3.72768e-09	8.78525e-07	11.1426
105	63	0	CUST_25402_PI428323385	CG41320	Probe	5740635	CG41320	CG41320 gene product from transcript CG41320-RA	1.35271	9.13001	9.07101	3.97674e-09	9.32014e-07	11.0789
173	123	0	CUST_11907_PI428323385	CG17077	Probe	42757	pnt	pointed	1.17964	8.32191	9.06328	4.03969e-09	9.36867e-07	11.0634
368	128	0	CUST_22143_PI428323385	CG33653	Probe	49968	Caps	Calcium activated protein for secretion	-1.79161	6.44827	-9.06302	4.04186e-09	9.36867e-07	11.0629
1	49	0	CUST_4335_PI428323385	CG12047	Probe	44839	mud	mushroom body defect	0.752226	6.431	9.03825	4.25069e-09	9.79889e-07	11.0132
191	139	0	CUST_35465_PI428323385	CG7035	Probe	44409	Cbp80	cap binding protein 80	-1.02247	10.5966	-8.96433	4.94261e-09	1.1332e-06	10.8644
255	1	0	CUST_4049_PI428323385	CG11897	Probe	43450	CG11897	CG11897 gene product from transcript CG11897-RA	-1.22008	7.80183	-8.86907	6.00925e-09	1.3703e-06	10.6715
346	71	0	CUST_36186_PI428323385	CG7356	Probe	34093	Tg	Transglutaminase	-1.26573	5.01716	-8.85234	6.2198e-09	1.41069e-06	10.6375
73	111	0	CUST_28099_PI428323385	CG43117	Probe	12798272	CG43117	CG43117 gene product from transcript CG43117-RB	1.44368	7.85199	8.84591	6.30278e-09	1.42187e-06	10.6245
30	113	0	CUST_24200_PI428323385	CG3649	Probe	37626	CG3649	CG3649 gene product from transcript CG3649-RB	1.49894	9.96037	8.8385	6.39973e-09	1.4337e-06	10.6094
221	136	0	CUST_2859_PI428323385	CG11263	Probe	39472	CG11263	CG11263 gene product from transcript CG11263-RA	0.854651	6.43731	8.83673	6.42323e-09	1.4337e-06	10.6058
235	99	0	CUST_22602_PI428323385	CG34002	Probe	3885644	CG34002	CG34002 gene product from transcript CG34002-RB	-2.29714	6.6302	-8.82575	6.57025e-09	1.4588e-06	10.5834
58	151	0	CUST_11206_PI428323385	CG1637	Probe	32019	CG1637	CG1637 gene product from transcript CG1637-RC	0.610266	9.65392	8.80981	6.79005e-09	1.49971e-06	10.5509
317	26	0	CUST_25531_PI428323385	CG4174	Probe	40023	CG4174	CG4174 gene product from transcript CG4174-RB	-1.34449	4.99938	-8.80461	6.8634e-09	1.50802e-06	10.5403
14	124	0	CUST_12739_PI428323385	CG17574	Probe	36415	CG17574	CG17574 gene product from transcript CG17574-RA	-0.686512	9.69506	-8.78196	7.19252e-09	1.57214e-06	10.4941
313	62	0	CUST_33874_PI428323385	CG6339	Probe	37564	rad50	CG6339 gene product from transcript CG6339-RE	-0.827677	11.6336	-8.73869	7.86708e-09	1.71073e-06	10.4055
267	75	0	CUST_17249_PI428323385	CG3074	Probe	37537	CG3074	CG3074 gene product from transcript CG3074-RB	-1.90736	7.29665	-8.72899	8.02691e-09	1.73653e-06	10.3857
188	16	0	CUST_34880_PI428323385	CG6794	Probe	35045	Dif	Dorsal-related immunity factor	-1.66521	6.8995	-8.72579	8.08049e-09	1.7392e-06	10.3791
285	123	0	CUST_5731_PI428323385	CG12843	Probe	35618	Tsp42Ei	Tetraspanin 42Ei	1.27451	7.80857	8.7179	8.21393e-09	1.75895e-06	10.3629
127	133	0	CUST_26625_PI428323385	CG42516	Probe	8674068	CG42516	CG42516 gene product from transcript CG42516-RB	-1.00752	6.41599	-8.7142	8.27743e-09	1.76359e-06	10.3553
45	158	0	CUST_17481_PI428323385	CG31062	Probe	43300	side	sidestep	-1.29386	5.20663	-8.70063	8.51413e-09	1.80491e-06	10.3275
40	39	0	CUST_33119_PI428323385	CG6013	Probe	42286	CG6013	CG6013 gene product from transcript CG6013-RA	1.0423	10.1515	8.68495	8.79647e-09	1.85544e-06	10.2952
76	104	0	CUST_33272_PI428323385	CG6084	Probe	39304	CG6084	CG6084 gene product from transcript CG6084-RB	-0.769217	11.7815	-8.68221	8.84681e-09	1.85677e-06	10.2896
69	73	0	CUST_41534_PI428323385	CG9733	Probe	43601	CG9733	CG9733 gene product from transcript CG9733-RA	-0.856564	7.10383	-8.67754	8.93332e-09	1.86565e-06	10.28
251	115	0	CUST_21261_PI428323385	CG33140	Probe	35642	CG33140	CG33140 gene product from transcript CG33140-RA	1.35469	6.1565	8.65801	9.30445e-09	1.93358e-06	10.2398
8	20	0	CUST_7606_PI428323385	CG13937	Probe	38249	CG13937	CG13937 gene product from transcript CG13937-RD	-1.44362	6.48493	-8.64883	9.48421e-09	1.95994e-06	10.2208
113	3	0	CUST_39758_PI428323385	CG8927	Probe	41964	CG8927	CG8927 gene product from transcript CG8927-RA	-2.21687	6.70614	-8.64682	9.52418e-09	1.95994e-06	10.2167
249	60	0	CUST_18449_PI428323385	CG31641	Probe	33863	stai	stathmin	-0.974739	5.48734	-8.61478	1.01834e-08	2.08542e-06	10.1505
88	100	0	CUST_17167_PI428323385	CG30488	Probe	246647	CG30488	CG30488 gene product from transcript CG30488-RA	0.997504	5.67012	8.61172	1.02487e-08	2.08866e-06	10.1442
59	122	0	CUST_38706_PI428323385	CG8454	Probe	41107	Vps16A	Vacuolar protein sorting 16A	-0.538241	9.83161	-8.60394	1.04169e-08	2.11273e-06	10.1281
18	25	0	CUST_22141_PI428323385	CG33653	Probe	49968	Caps	Calcium activated protein for secretion	-1.84265	6.44238	-8.59721	1.05645e-08	2.13242e-06	10.1142
255	157	0	CUST_40301_PI428323385	CG9170	Probe	32563	CG9170	CG9170 gene product from transcript CG9170-RB	-0.940648	10.2016	-8.58209	1.09044e-08	2.18338e-06	10.0829
342	111	0	CUST_25022_PI428323385	CG40178	Probe	3354941	CG40178	CG40178 gene product from transcript CG40178-RA	1.06936	8.46516	8.58139	1.09205e-08	2.18338e-06	10.0815
280	63	0	CUST_28022_PI428323385	CG43079	Probe	40515	nrm	neuromusculin	1.34473	6.37328	8.57085	1.11643e-08	2.2216e-06	10.0596
111	161	0	CUST_11905_PI428323385	CG17077	Probe	42757	pnt	pointed	1.22383	8.22262	8.56375	1.1332e-08	2.24437e-06	10.0449
59	121	0	CUST_39489_PI428323385	CG8799	Probe	47905	l(2)03659	lethal (2) 03659	-1.30599	6.65875	-8.50896	1.27147e-08	2.50646e-06	9.93109
340	116	0	CUST_11908_PI428323385	CG17077	Probe	42757	pnt	pointed	1.16267	8.1841	8.50652	1.27802e-08	2.50765e-06	9.92601
38	81	0	CUST_5971_PI428323385	CG1299	Probe	38496	CG1299	CG1299 gene product from transcript CG1299-RA	-1.07052	8.86864	-8.48603	1.3344e-08	2.59641e-06	9.88333
343	61	0	CUST_17485_PI428323385	CG31062	Probe	43300	side	sidestep	-1.27032	5.15664	-8.48561	1.33557e-08	2.59641e-06	9.88246
62	34	0	CUST_7611_PI428323385	CG13941	Probe	36597	Arc2	CG13941 gene product from transcript CG13941-RA	-1.54559	8.39404	-8.48182	1.34627e-08	2.60522e-06	9.87457
13	102	0	CUST_39408_PI428323385	CG8768	Probe	36400	CG8768	CG8768 gene product from transcript CG8768-RA	1.07007	8.83305	8.39677	1.61148e-08	3.09786e-06	9.69672
18	37	0	CUST_18938_PI428323385	CG31875	Probe	318996	CG31875	CG31875 gene product from transcript CG31875-RD	-1.08612	7.25843	-8.39559	1.61553e-08	3.09786e-06	9.69424
338	121	0	CUST_28074_PI428323385	CG43103	Probe	12798325	CG43103	CG43103 gene product from transcript CG43103-RA	2.01898	8.01338	8.37534	1.68642e-08	3.21915e-06	9.65175
372	134	0	CUST_25151_PI428323385	CG40452	Probe	3355084	Snap25	Synapse protein 25	-1.4172	5.13383	-8.34067	1.81535e-08	3.44966e-06	9.57886
349	93	0	CUST_17486_PI428323385	CG31062	Probe	43300	side	sidestep	-1.18379	5.11001	-8.3186	1.90267e-08	3.59937e-06	9.53238
77	124	0	CUST_32470_PI428323385	CG5704	Probe	48613	CG5704	CG5704 gene product from transcript CG5704-RA	0.826186	9.57144	8.31541	1.91564e-08	3.60774e-06	9.52565
282	131	0	CUST_12747_PI428323385	CG17574	Probe	36415	CG17574	CG17574 gene product from transcript CG17574-RA	-1.08664	7.30865	-8.28809	2.03057e-08	3.80717e-06	9.468
220	114	0	CUST_5319_PI428323385	CG12559	Probe	3354888	rl	rolled	-0.607325	9.67322	-8.286	2.03966e-08	3.8073e-06	9.46358
65	24	0	CUST_18906_PI428323385	CG31864	Probe	318990	Qtzl	Quetzalcoatl	-0.664754	10.9808	-8.26111	2.15103e-08	3.9975e-06	9.41096
296	84	0	CUST_25082_PI428323385	CG40300	Probe	3355150	2003-08-01	Argonaute 3	-1.21179	6.95715	-8.2328	2.28537e-08	4.22854e-06	9.35099
11	22	0	CUST_36893_PI428323385	CG7695	Probe	42234	CG7695	CG7695 gene product from transcript CG7695-RA	-0.904618	5.29902	-8.21252	2.38687e-08	4.38963e-06	9.30798
127	36	0	CUST_11097_PI428323385	CG15905	Probe	37257	CG15905	CG15905 gene product from transcript CG15905-RB	0.810424	13.6643	8.21128	2.39324e-08	4.38963e-06	9.30534
132	77	0	CUST_17934_PI428323385	CG31279	Probe	318657	CG31279	CG31279 gene product from transcript CG31279-RB	-0.933663	5.00751	-8.18454	2.53458e-08	4.62873e-06	9.24854
76	29	0	CUST_28024_PI428323385	CG43079	Probe	40515	nrm	neuromusculin	1.15137	6.12251	8.17675	2.57737e-08	4.67642e-06	9.23196
69	90	0	CUST_29429_PI428323385	CG4381	Probe	48336	GstD3	Glutathione S transferase D3	-0.767835	12.8185	-8.17576	2.58286e-08	4.67642e-06	9.22985
22	158	0	CUST_14024_PI428323385	CG18278	Probe	36487	CG18278	CG18278 gene product from transcript CG18278-RA	-0.994406	10.3972	-8.14606	2.7533e-08	4.9637e-06	9.16658
297	149	0	CUST_15352_PI428323385	CG2161	Probe	40683	Rga	Regena	1.06824	12.2015	8.10341	3.01848e-08	5.41862e-06	9.07552
218	124	0	CUST_29998_PI428323385	CG4562	Probe	42362	CG4562	CG4562 gene product from transcript CG4562-RB	-0.90263	7.98563	-8.08955	3.11017e-08	5.55956e-06	9.04589
182	33	0	CUST_25153_PI428323385	CG40452	Probe	3355084	Snap25	Synapse protein 25	-1.15698	5.25202	-8.06873	3.25337e-08	5.79099e-06	9.00131
129	153	0	CUST_28073_PI428323385	CG43103	Probe	12798325	CG43103	CG43103 gene product from transcript CG43103-RA	2.04974	8.05596	8.05832	3.32753e-08	5.88974e-06	8.97898
19	145	0	CUST_38792_PI428323385	CG8493	Probe	36339	Den1	Deneddylase 1	-0.87731	10.7497	-8.05704	3.33676e-08	5.88974e-06	8.97624
103	159	0	CUST_21030_PI428323385	CG33048	Probe	39238	Mocs1	Molybdenum cofactor synthesis 1 ortholog	-1.0218	6.80562	-8.01324	3.66915e-08	6.44497e-06	8.88217
362	116	0	CUST_10111_PI428323385	CG15236	Probe	35595	CG15236	CG15236 gene product from transcript CG15236-RB	1.21924	5.26337	8.01164	3.68188e-08	6.44497e-06	8.87874
202	122	0	CUST_4641_PI428323385	CG12163	Probe	40628	CG12163	CG12163 gene product from transcript CG12163-RB	0.778374	8.34673	8.00914	3.70194e-08	6.4533e-06	8.87336
258	13	0	CUST_8479_PI428323385	CG14394	Probe	41568	CG14394	CG14394 gene product from transcript CG14394-RB	1.34923	5.8979	7.9965	3.80503e-08	6.60572e-06	8.84615
9	120	0	CUST_23139_PI428323385	CG34278	Probe	5740656	CG34278	CG34278 gene product from transcript CG34278-RA	0.901097	6.23922	7.97783	3.96265e-08	6.85116e-06	8.80594
19	144	0	CUST_35330_PI428323385	CG6986	Probe	31408	Proc-R	Proctolin receptor	-0.820887	5.0092	-7.96895	4.03993e-08	6.94446e-06	8.7868
137	55	0	CUST_28988_PI428323385	CG43646	Probe	NA	NA	NA	-1.73935	5.54217	-7.96786	4.04954e-08	6.94446e-06	8.78445
323	102	0	CUST_13277_PI428323385	CG17803	Probe	42141	CG17803	CG17803 gene product from transcript CG17803-RA	-1.33794	7.40499	-7.94771	4.23128e-08	7.22674e-06	8.74095
201	123	0	CUST_5825_PI428323385	CG12908	Probe	36089	Ndg	Nidogen/entactin	-1.39712	4.61824	-7.91995	4.4954e-08	7.64689e-06	8.68095
90	106	0	CUST_20893_PI428323385	CG32825	Probe	260693	Or19b	Odorant receptor 19b	-1.78887	4.95394	-7.90397	4.6551e-08	7.88675e-06	8.64636
29	119	0	CUST_28017_PI428323385	CG43079	Probe	40515	nrm	neuromusculin	0.971765	5.7262	7.89291	4.76908e-08	8.0455e-06	8.62238
235	8	0	CUST_26626_PI428323385	CG42516	Probe	8674068	CG42516	CG42516 gene product from transcript CG42516-RB	-1.15565	6.19547	-7.8906	4.7932e-08	8.0455e-06	8.61738
43	14	0	CUST_9487_PI428323385	CG14945	Probe	34623	CG14945	CG14945 gene product from transcript CG14945-RB	-0.854775	6.46492	-7.88938	4.80602e-08	8.0455e-06	8.61474
32	104	0	CUST_40302_PI428323385	CG9170	Probe	32563	CG9170	CG9170 gene product from transcript CG9170-RB	-0.88348	10.3337	-7.88616	4.84001e-08	8.07038e-06	8.60775
121	160	0	CUST_7605_PI428323385	CG13937	Probe	38249	CG13937	CG13937 gene product from transcript CG13937-RD	-1.4641	6.49987	-7.87418	4.96857e-08	8.25213e-06	8.58177
104	16	0	CUST_7612_PI428323385	CG13941	Probe	36597	Arc2	CG13941 gene product from transcript CG13941-RA	-1.55398	8.31505	-7.86581	5.06045e-08	8.37178e-06	8.56361
57	64	0	CUST_34863_PI428323385	CG6785	Probe	34620	CG6785	CG6785 gene product from transcript CG6785-RA	-0.993436	6.87151	-7.84288	5.32137e-08	8.76904e-06	8.51378
135	12	0	CUST_4642_PI428323385	CG12163	Probe	40628	CG12163	CG12163 gene product from transcript CG12163-RB	0.78237	8.4001	7.80352	5.80175e-08	9.52345e-06	8.42811
59	67	0	CUST_24210_PI428323385	CG3653	Probe	31292	kirre	kin of irre	-0.634519	8.83472	-7.78944	5.98427e-08	9.78498e-06	8.3974
67	3	0	CUST_14419_PI428323385	CG18543	Probe	38958	mtrm	matrimony	-1.00226	6.23785	-7.77868	6.12775e-08	9.9809e-06	8.37392
100	53	0	CUST_31511_PI428323385	CG5247	Probe	117419	Irbp	Inverted repeat-binding protein	-0.708442	10.315	-7.72795	6.85315e-08	1.11195e-05	8.26299
248	100	0	CUST_6147_PI428323385	CG13083	Probe	35230	CG13083	CG13083 gene product from transcript CG13083-RB	1.61692	4.93101	7.7212	6.95616e-08	1.12434e-05	8.2482
262	37	0	CUST_16446_PI428323385	CG30059	Probe	246425	CG30059	CG30059 gene product from transcript CG30059-RA	-0.98188	10.5237	-7.71667	7.02615e-08	1.13132e-05	8.23828
95	149	0	CUST_16845_PI428323385	CG30323	Probe	246539	CG30323	CG30323 gene product from transcript CG30323-RB	-0.939572	4.83606	-7.70741	7.17152e-08	1.15008e-05	8.21797
199	22	0	CUST_3187_PI428323385	CG11400	Probe	36935	CG11400	CG11400 gene product from transcript CG11400-RA	0.978718	6.7934	7.7058	7.19717e-08	1.15008e-05	8.21443
86	119	0	CUST_11807_PI428323385	CG1702	Probe	33047	CG1702	CG1702 gene product from transcript CG1702-RB	-0.951249	10.8975	-7.70366	7.23134e-08	1.15117e-05	8.20973
51	123	0	CUST_7603_PI428323385	CG13937	Probe	38249	CG13937	CG13937 gene product from transcript CG13937-RD	-1.51705	6.44693	-7.69712	7.33672e-08	1.16356e-05	8.19539
36	117	0	CUST_6066_PI428323385	CG13041	Probe	39801	CG13041	CG13041 gene product from transcript CG13041-RA	-1.10307	8.93245	-7.69391	7.38897e-08	1.16654e-05	8.18835
30	69	0	CUST_33040_PI428323385	CG5966	Probe	31532	CG5966	CG5966 gene product from transcript CG5966-RA	-1.18961	6.68037	-7.69258	7.41083e-08	1.16654e-05	8.18542
276	74	0	CUST_10705_PI428323385	CG15623	Probe	33360	c-cup	calcutta cup	-1.2453	4.7726	-7.68047	7.61224e-08	1.19379e-05	8.15883
134	98	0	CUST_14299_PI428323385	CG18455	Probe	44108	Optix	CG18455 gene product from transcript CG18455-RA	-1.08665	6.29928	-7.67835	7.64801e-08	1.19496e-05	8.15418
198	39	0	CUST_8240_PI428323385	CG14257	Probe	43257	CG14257	CG14257 gene product from transcript CG14257-RB	0.958917	8.10356	7.67179	7.76002e-08	1.20736e-05	8.13976
39	51	0	CUST_21031_PI428323385	CG33048	Probe	39238	Mocs1	Molybdenum cofactor synthesis 1 ortholog	-1.04183	8.87148	-7.67036	7.78461e-08	1.20736e-05	8.13663
20	5	0	CUST_459_PI428323385	CG10200	Probe	36648	CG10200	CG10200 gene product from transcript CG10200-RB	0.647682	12.3683	7.63118	8.49174e-08	1.30643e-05	8.0504
285	104	0	CUST_28020_PI428323385	CG43079	Probe	40515	nrm	neuromusculin	1.13356	5.64242	7.6304	8.50663e-08	1.30643e-05	8.04867
84	109	0	CUST_36782_PI428323385	CG7627	Probe	34148	CG7627	CG7627 gene product from transcript CG7627-RB	-0.801656	10.6245	-7.62988	8.5163e-08	1.30643e-05	8.04754
205	58	0	CUST_2649_PI428323385	CG11155	Probe	43822	CG11155	CG11155 gene product from transcript CG11155-RA	-1.00953	6.3459	-7.62148	8.67681e-08	1.32623e-05	8.02902
101	93	0	CUST_39488_PI428323385	CG8799	Probe	47905	l(2)03659	lethal (2) 03659	-0.893081	8.90734	-7.61345	8.83327e-08	1.34527e-05	8.0113
310	80	0	CUST_6065_PI428323385	CG13041	Probe	39801	CG13041	CG13041 gene product from transcript CG13041-RA	-1.13659	8.96024	-7.61145	8.8725e-08	1.34639e-05	8.0069
140	56	0	CUST_16164_PI428323385	CG2914	Probe	33229	Ets21C	Ets at 21C	-1.12408	5.60385	-7.59609	9.18103e-08	1.38821e-05	7.973
75	151	0	CUST_5973_PI428323385	CG1299	Probe	38496	CG1299	CG1299 gene product from transcript CG1299-RA	-1.09696	8.68419	-7.59098	9.28616e-08	1.39909e-05	7.96171
136	115	0	CUST_16473_PI428323385	CG3008	Probe	33693	CG3008	CG3008 gene product from transcript CG3008-RA	-0.70231	10.3977	-7.58928	9.3214e-08	1.3994e-05	7.95795
140	160	0	CUST_773_PI428323385	CG10339	Probe	37854	CG10339	CG10339 gene product from transcript CG10339-RA	-0.881518	5.64495	-7.57109	9.70703e-08	1.45213e-05	7.91774
248	23	0	CUST_28025_PI428323385	CG43079	Probe	40515	nrm	neuromusculin	0.807599	5.38374	7.56796	9.77496e-08	1.45713e-05	7.91082
277	48	0	CUST_36752_PI428323385	CG7607	Probe	39263	CG7607	CG7607 gene product from transcript CG7607-RA	1.24878	5.52449	7.55731	1.001e-07	1.48645e-05	7.88726
188	144	0	CUST_1426_PI428323385	CG10638	Probe	39424	CG10638	CG10638 gene product from transcript CG10638-RA	-0.974889	8.09832	-7.55587	1.00422e-07	1.48645e-05	7.88407
130	126	0	CUST_16714_PI428323385	CG30196	Probe	37595	CG30196	CG30196 gene product from transcript CG30196-RA	-1.73126	8.08845	-7.54259	1.03446e-07	1.52586e-05	7.85464
188	12	0	CUST_10350_PI428323385	CG15400	Probe	33476	CG15400	CG15400 gene product from transcript CG15400-RB	-1.03715	7.01401	-7.5236	1.07929e-07	1.58644e-05	7.81256
262	157	0	CUST_11098_PI428323385	CG15905	Probe	37257	CG15905	CG15905 gene product from transcript CG15905-RB	0.806851	13.5781	7.51919	1.09e-07	1.59663e-05	7.80276
18	6	0	CUST_21658_PI428323385	CG33302	Probe	2768918	Cpr31A	Cuticular protein 31A	1.13505	6.93947	7.51589	1.09807e-07	1.60287e-05	7.79545
183	36	0	CUST_34261_PI428323385	CG6530	Probe	36961	mthl3	methuselah-like 3	-0.904412	11.171	-7.49973	1.13851e-07	1.65245e-05	7.75956
141	126	0	CUST_7601_PI428323385	CG13937	Probe	38249	CG13937	CG13937 gene product from transcript CG13937-RD	-1.43201	6.45838	-7.4992	1.13987e-07	1.65245e-05	7.75838
88	44	0	CUST_16713_PI428323385	CG30196	Probe	37595	CG30196	CG30196 gene product from transcript CG30196-RA	-1.85865	8.00262	-7.49701	1.14546e-07	1.65488e-05	7.75352
55	125	0	CUST_1178_PI428323385	CG10539	Probe	38654	S6k	RPS6-p70-protein kinase	1.02911	9.38585	7.42311	1.35214e-07	1.9468e-05	7.58895
15	59	0	CUST_20346_PI428323385	CG32549	Probe	32822	CG32549	CG32549 gene product from transcript CG32549-RD	-0.857782	5.54677	-7.41068	1.39047e-07	1.99519e-05	7.56121
55	4	0	CUST_17250_PI428323385	CG3074	Probe	37537	CG3074	CG3074 gene product from transcript CG3074-RB	-1.95714	7.24337	-7.39463	1.44167e-07	2.06164e-05	7.52533
198	149	0	CUST_6774_PI428323385	CG13436	Probe	37334	CG13436	CG13436 gene product from transcript CG13436-RA	-0.91691	6.98066	-7.38117	1.48606e-07	2.11794e-05	7.49524
34	6	0	CUST_16165_PI428323385	CG2914	Probe	33229	Ets21C	Ets at 21C	-0.815597	5.60459	-7.35512	1.57603e-07	2.23494e-05	7.43691
20	119	0	CUST_7516_PI428323385	CG13897	Probe	38090	CG13897	CG13897 gene product from transcript CG13897-RA	1.05255	8.23502	7.35436	1.57875e-07	2.23494e-05	7.4352
280	42	0	CUST_25046_PI428323385	CG40218	Probe	7354404	Yeti	CG40218 gene product from transcript CG40218-RA	-0.54739	13.3569	-7.33647	1.64388e-07	2.31936e-05	7.39508
155	99	0	CUST_31087_PI428323385	CG5022	Probe	34398	CG5022	CG5022 gene product from transcript CG5022-RA	-1.25489	7.7234	-7.33419	1.65236e-07	2.32355e-05	7.38997
186	151	0	CUST_11644_PI428323385	CG16928	Probe	34565	mre11	meiotic recombination 11	-0.75257	10.9251	-7.32733	1.67819e-07	2.35203e-05	7.37458
24	103	0	CUST_8242_PI428323385	CG14257	Probe	43257	CG14257	CG14257 gene product from transcript CG14257-RB	0.809567	10.4834	7.30829	1.75208e-07	2.44746e-05	7.33182
356	116	0	CUST_22720_PI428323385	CG3409	Probe	35578	CG3409	CG3409 gene product from transcript CG3409-RB	-0.854328	8.04743	-7.30621	1.76036e-07	2.4509e-05	7.32714
73	104	0	CUST_1269_PI428323385	CG1058	Probe	40580	rpk	ripped pocket	-1.20186	8.19835	-7.2967	1.79869e-07	2.49604e-05	7.30576
215	16	0	CUST_11962_PI428323385	CG17104	Probe	34465	CG17104	CG17104 gene product from transcript CG17104-RA	-1.02893	7.95839	-7.29407	1.80947e-07	2.50276e-05	7.29983
353	31	0	CUST_25031_PI428323385	CG40191	Probe	3354930	CG40191	CG40191 gene product from transcript CG40191-RC	-0.551798	11.8588	-7.26877	1.91633e-07	2.6419e-05	7.24289
158	23	0	CUST_11910_PI428323385	CG17077	Probe	42757	pnt	pointed	1.10168	8.25303	7.25159	1.99254e-07	2.73803e-05	7.20418
347	100	0	CUST_556_PI428323385	CG10245	Probe	36664	Cyp6a20	CG10245 gene product from transcript CG10245-RB	-1.42171	5.18688	-7.24259	2.03371e-07	2.78552e-05	7.18388
96	78	0	CUST_7604_PI428323385	CG13937	Probe	38249	CG13937	CG13937 gene product from transcript CG13937-RD	-1.32298	6.44505	-7.23784	2.05579e-07	2.80665e-05	7.17316
355	91	0	CUST_8241_PI428323385	CG14257	Probe	43257	CG14257	CG14257 gene product from transcript CG14257-RB	0.753885	10.4909	7.22102	2.13597e-07	2.90671e-05	7.13518
206	43	0	CUST_30009_PI428323385	CG4570	Probe	41306	CG4570	CG4570 gene product from transcript CG4570-RA	1.046	5.83113	7.21489	2.166e-07	2.9381e-05	7.12133
149	110	0	CUST_16445_PI428323385	CG30059	Probe	246425	CG30059	CG30059 gene product from transcript CG30059-RA	-0.939216	10.3457	-7.1663	2.4197e-07	3.27172e-05	7.01138
128	23	0	CUST_30663_PI428323385	CG4859	Probe	37949	Mmp1	Matrix metalloproteinase 1	-0.565458	9.33866	-7.15397	2.48881e-07	3.35441e-05	6.98343
302	73	0	CUST_17319_PI428323385	CG31006	Probe	43683	stops	slow termination of phototransduction	-0.768354	5.85423	-7.14557	2.53705e-07	3.40853e-05	6.96437
94	13	0	CUST_24450_PI428323385	CG3767	Probe	36819	JhI-26	Juvenile hormone-inducible protein 26	-1.40148	4.78508	-7.14317	2.55104e-07	3.41645e-05	6.95891
132	46	0	CUST_41777_PI428323385	CG9841	Probe	37444	EfSec	CG9841 gene product from transcript CG9841-RA	-0.903164	7.90753	-7.13027	2.6274e-07	3.50757e-05	6.92963
309	120	0	CUST_12748_PI428323385	CG17574	Probe	36415	CG17574	CG17574 gene product from transcript CG17574-RA	-1.15431	7.3415	-7.12485	2.66017e-07	3.54013e-05	6.91733
349	19	0	CUST_21444_PI428323385	CG33198	Probe	251430	pen-2	presenilin enhancer	-0.919312	9.47641	-7.1195	2.69293e-07	3.57245e-05	6.90518
132	95	0	CUST_34974_PI428323385	CG6831	Probe	38978	rhea	CG6831 gene product from transcript CG6831-RB	-0.618526	5.46952	-7.1099	2.75278e-07	3.6404e-05	6.88336
204	36	0	CUST_10431_PI428323385	CG15444	Probe	33659	ine	inebriated	-0.824643	5.42652	-7.04966	3.16076e-07	4.16687e-05	6.74615
181	143	0	CUST_40390_PI428323385	CG9214	Probe	32574	Tob	CG9214 gene product from transcript CG9214-RA	-1.80637	5.69995	-7.045	3.19478e-07	4.1986e-05	6.73552
6	37	0	CUST_15990_PI428323385	CG2788	Probe	44058	Dot	Dorothy	-0.635503	7.36065	-7.04161	3.21979e-07	4.21164e-05	6.72778
143	28	0	CUST_41646_PI428323385	CG9771	Probe	40579	Dip2	Dorsal interacting protein 2	0.653231	11.2298	7.04095	3.22467e-07	4.21164e-05	6.72628
34	123	0	CUST_21443_PI428323385	CG33198	Probe	251430	pen-2	presenilin enhancer	-0.935165	9.51205	-7.03339	3.28125e-07	4.27231e-05	6.70901
155	13	0	CUST_22719_PI428323385	CG3409	Probe	35578	CG3409	CG3409 gene product from transcript CG3409-RB	-0.852221	7.4982	-7.02648	3.33378e-07	4.32735e-05	6.69324
237	126	0	CUST_6106_PI428323385	CG13062	Probe	39799	CG13062	CG13062 gene product from transcript CG13062-RB	-0.792539	5.68957	-7.02411	3.35201e-07	4.33766e-05	6.68783
208	85	0	CUST_4855_PI428323385	CG12275	Probe	43321	RpS10a	Ribosomal protein S10a	1.07881	5.85529	7.02118	3.37471e-07	4.35368e-05	6.68113
85	155	0	CUST_34776_PI428323385	CG6754	Probe	44259	nbs	CG6754 gene product from transcript CG6754-RD	-0.470685	11.083	-6.97186	3.78102e-07	4.86298e-05	6.56826
113	19	0	CUST_37091_PI428323385	CG7787	Probe	34142	CG7787	CG7787 gene product from transcript CG7787-RA	-1.04759	8.04378	-6.95361	3.94369e-07	5.05556e-05	6.52643
187	4	0	CUST_18649_PI428323385	CG31728	Probe	34731	CG31728	CG31728 gene product from transcript CG31728-RC	-0.935319	12.2854	-6.95241	3.95471e-07	5.05556e-05	6.52366
122	49	0	CUST_4662_PI428323385	CG12177	Probe	32326	CG12177	CG12177 gene product from transcript CG12177-RA	-1.09448	7.79899	-6.94392	4.03303e-07	5.1401e-05	6.50419
292	127	0	CUST_3479_PI428323385	CG1155	Probe	40770	Osi14	Osiris 14	-1.44176	7.29695	-6.92103	4.25226e-07	5.40319e-05	6.45163
57	153	0	CUST_36183_PI428323385	CG7356	Probe	34093	Tg	Transglutaminase	-0.967337	5.0489	-6.91831	4.27915e-07	5.42103e-05	6.44537
30	67	0	CUST_21657_PI428323385	CG33302	Probe	2768918	Cpr31A	Cuticular protein 31A	0.969385	7.23208	6.91323	4.32982e-07	5.4688e-05	6.43368
33	24	0	CUST_25156_PI428323385	CG40452	Probe	3355084	Snap25	Synapse protein 25	-1.11467	5.53223	-6.90777	4.38492e-07	5.52186e-05	6.42113
244	6	0	CUST_15197_PI428323385	CG2086	Probe	38218	drpr	draper	-0.774842	5.32782	-6.90581	4.40481e-07	5.5304e-05	6.41663
122	12	0	CUST_25080_PI428323385	CG40300	Probe	3355150	2003-08-01	Argonaute 3	-1.1311	6.82851	-6.90228	4.44098e-07	5.55926e-05	6.40852
346	136	0	CUST_11906_PI428323385	CG17077	Probe	42757	pnt	pointed	1.10766	8.12315	6.896	4.50611e-07	5.62411e-05	6.39406
337	30	0	CUST_12740_PI428323385	CG17574	Probe	36415	CG17574	CG17574 gene product from transcript CG17574-RA	-0.544803	9.61654	-6.89362	4.53098e-07	5.63846e-05	6.38859
143	69	0	CUST_12700_PI428323385	CG17533	Probe	37113	GstE8	Glutathione S transferase E8	-1.86801	8.80729	-6.87678	4.71144e-07	5.84579e-05	6.34981
92	64	0	CUST_12753_PI428323385	CG17574	Probe	36415	CG17574	CG17574 gene product from transcript CG17574-RA	-0.585408	9.73101	-6.86985	4.78785e-07	5.92318e-05	6.33384
13	87	0	CUST_37605_PI428323385	CG8023	Probe	38923	eIF4E-3	CG8023 gene product from transcript CG8023-RA	1.0977	5.06367	6.85753	4.92681e-07	6.07726e-05	6.30543
350	44	0	CUST_19357_PI428323385	CG32100	Probe	39400	CG32100	CG32100 gene product from transcript CG32100-RA	-0.739499	6.79992	-6.83115	5.23822e-07	6.44255e-05	6.24457
37	62	0	CUST_17487_PI428323385	CG31062	Probe	43300	side	sidestep	-1.19704	5.08012	-6.82752	5.28266e-07	6.47833e-05	6.23618
79	68	0	CUST_36331_PI428323385	CG7421	Probe	40433	Nopp140	CG7421 gene product from transcript CG7421-RB	0.513781	8.38823	6.81988	5.3774e-07	6.5754e-05	6.21853
98	49	0	CUST_36781_PI428323385	CG7627	Probe	34148	CG7627	CG7627 gene product from transcript CG7627-RB	-0.736663	10.7102	-6.81528	5.43527e-07	6.62695e-05	6.2079
60	13	0	CUST_31512_PI428323385	CG5247	Probe	117419	Irbp	Inverted repeat-binding protein	-0.718497	10.1473	-6.81071	5.49345e-07	6.67858e-05	6.19733
23	148	0	CUST_34523_PI428323385	CG6654	Probe	41831	CG6654	CG6654 gene product from transcript CG6654-RA	-0.744824	8.00749	-6.80926	5.51197e-07	6.68184e-05	6.19399
31	123	0	CUST_3974_PI428323385	CG11856	Probe	43041	Nup358	Nucleoporin 358	-0.634587	10.5539	-6.8062	5.55143e-07	6.71039e-05	6.18691
116	60	0	CUST_39392_PI428323385	CG8764	Probe	45401	ox	oxen	0.743756	13.2273	6.7851	5.83116e-07	7.02838e-05	6.13809
91	100	0	CUST_3480_PI428323385	CG1155	Probe	40770	Osi14	Osiris 14	-1.26016	7.39907	-6.77952	5.9075e-07	7.1001e-05	6.12518
74	160	0	CUST_16660_PI428323385	CG30170	Probe	47873	bgcn	benign gonial cell neoplasm	-0.655885	5.89275	-6.77665	5.94726e-07	7.12759e-05	6.11851
11	62	0	CUST_37092_PI428323385	CG7787	Probe	34142	CG7787	CG7787 gene product from transcript CG7787-RA	-1.03293	8.15924	-6.77073	6.02991e-07	7.20617e-05	6.10481
164	162	0	CUST_40487_PI428323385	CG9252	Probe	35380	del	deadlock	-0.860852	9.76805	-6.7695	6.04726e-07	7.20649e-05	6.10196
117	7	0	CUST_28486_PI428323385	CG43265	Probe	12798315	CG43265	CG43265 gene product from transcript CG43265-RA	-0.856196	6.19749	-6.76291	6.14106e-07	7.29766e-05	6.08667
76	41	0	CUST_7515_PI428323385	CG13897	Probe	38090	CG13897	CG13897 gene product from transcript CG13897-RA	1.03399	8.1037	6.75447	6.26321e-07	7.42191e-05	6.06712
304	33	0	CUST_28018_PI428323385	CG43079	Probe	40515	nrm	neuromusculin	1.1901	6.13861	6.74242	6.44198e-07	7.61236e-05	6.03917
263	78	0	CUST_4050_PI428323385	CG11897	Probe	43450	CG11897	CG11897 gene product from transcript CG11897-RA	-1.3124	7.94759	-6.73156	6.6076e-07	7.78627e-05	6.01396
379	9	0	CUST_20427_PI428323385	CG32581	Probe	318098	CG32581	CG32581 gene product from transcript CG32581-RB	-1.21875	8.87222	-6.73032	6.6268e-07	7.78713e-05	6.01108
251	104	0	CUST_28026_PI428323385	CG43079	Probe	40515	nrm	neuromusculin	1.10634	5.64408	6.72244	6.75002e-07	7.9099e-05	5.99279
130	14	0	CUST_6102_PI428323385	CG13060	Probe	39802	CG13060	CG13060 gene product from transcript CG13060-RA	-1.25374	9.42572	-6.71962	6.79474e-07	7.94025e-05	5.98623
193	140	0	CUST_25034_PI428323385	CG40191	Probe	3354930	CG40191	CG40191 gene product from transcript CG40191-RC	-0.613759	10.5152	-6.71459	6.87527e-07	8.01216e-05	5.97453
308	21	0	CUST_15760_PI428323385	CG2560	Probe	32198	Cpr11A	Cuticular protein 11A	-1.05414	5.65392	-6.70888	6.96778e-07	8.0976e-05	5.96126
92	87	0	CUST_31333_PI428323385	CG5164	Probe	37106	GstE1	Glutathione S transferase E1	0.744658	10.3923	6.70095	7.09823e-07	8.20659e-05	5.94284
251	140	0	CUST_36185_PI428323385	CG7356	Probe	34093	Tg	Transglutaminase	-1.06333	5.11032	-6.70082	7.10048e-07	8.20659e-05	5.94253
32	42	0	CUST_25045_PI428323385	CG40218	Probe	7354404	Yeti	CG40218 gene product from transcript CG40218-RA	-0.5457	13.7441	-6.69708	7.16287e-07	8.25609e-05	5.93384
209	155	0	CUST_2442_PI428323385	CG11066	Probe	35505	scaf	scarface	-0.852743	8.949	-6.69472	7.20266e-07	8.27933e-05	5.92834
223	114	0	CUST_4343_PI428323385	CG12047	Probe	44839	mud	mushroom body defect	0.881105	6.42933	6.66405	7.73958e-07	8.87233e-05	5.85694
121	93	0	CUST_7500_PI428323385	CG13890	Probe	38100	CG13890	CG13890 gene product from transcript CG13890-RA	1.24203	11.0436	6.65915	7.82909e-07	8.95062e-05	5.84552
97	134	0	CUST_15989_PI428323385	CG2788	Probe	44058	Dot	Dorothy	-0.563185	7.994	-6.65722	7.86477e-07	8.96711e-05	5.84101
6	123	0	CUST_11205_PI428323385	CG1637	Probe	32019	CG1637	CG1637 gene product from transcript CG1637-RC	0.565275	9.58928	6.65285	7.94571e-07	9.03498e-05	5.83084
340	87	0	CUST_10816_PI428323385	CG15707	Probe	36804	krimp	krimper	1.50431	8.01914	6.64999	7.99926e-07	9.07142e-05	5.82417
152	56	0	CUST_345_PI428323385	CG10151	Probe	36639	CG10151	CG10151 gene product from transcript CG10151-RA	-0.650946	7.4921	-6.6395	8.19878e-07	9.27275e-05	5.79971
170	143	0	CUST_4344_PI428323385	CG12047	Probe	44839	mud	mushroom body defect	0.613162	6.08943	6.63649	8.25703e-07	9.31367e-05	5.79268
234	25	0	CUST_36097_PI428323385	CG7314	Probe	39322	Bmcp	CG7314 gene product from transcript CG7314-RB	-0.911986	7.06627	-6.63146	8.35515e-07	9.39921e-05	5.78095
36	35	0	CUST_10429_PI428323385	CG15444	Probe	33659	ine	inebriated	-0.852344	5.52875	-6.62504	8.48228e-07	9.51685e-05	5.76595
37	32	0	CUST_20345_PI428323385	CG32549	Probe	32822	CG32549	CG32549 gene product from transcript CG32549-RD	-0.85091	5.48525	-6.6184	8.61574e-07	9.64095e-05	5.75045
38	8	0	CUST_11736_PI428323385	CG16979	Probe	39687	CG16979	CG16979 gene product from transcript CG16979-RA	0.539388	10.6232	6.61048	8.77785e-07	9.79636e-05	5.73194
185	47	0	CUST_36014_PI428323385	CG7266	Probe	39675	Eip71CD	Ecdysone-induced protein 28/29kD	-0.576726	10.4707	-6.60071	8.98206e-07	9.99781e-05	5.7091
374	147	0	CUST_24199_PI428323385	CG3649	Probe	37626	CG3649	CG3649 gene product from transcript CG3649-RB	1.41463	9.65597	6.58945	9.22323e-07	0.000102306	5.68279
82	71	0	CUST_2837_PI428323385	CG11253	Probe	39481	CG11253	CG11253 gene product from transcript CG11253-RA	1.04999	8.05342	6.5887	9.23971e-07	0.000102306	5.68102
192	103	0	CUST_10815_PI428323385	CG15707	Probe	36804	krimp	krimper	1.62748	7.67632	6.56719	9.72012e-07	0.000106922	5.63069
53	101	0	CUST_25401_PI428323385	CG41320	Probe	5740635	CG41320	CG41320 gene product from transcript CG41320-RA	0.872287	6.93401	6.56708	9.72264e-07	0.000106922	5.63043
39	86	0	CUST_28165_PI428323385	CG4313	Probe	31169	CG4313	CG4313 gene product from transcript CG4313-RA	-0.884437	6.27459	-6.56626	9.74137e-07	0.000106922	5.62852
206	42	0	CUST_28027_PI428323385	CG43079	Probe	40515	nrm	neuromusculin	1.17604	6.21723	6.56554	9.75795e-07	0.000106922	5.62683
116	139	0	CUST_14423_PI428323385	CG18547	Probe	41452	CG18547	CG18547 gene product from transcript CG18547-RA	-0.732891	12.1252	-6.54772	1.01771e-06	0.000111226	5.58507
235	10	0	CUST_33017_PI428323385	CG5953	Probe	34985	CG5953	CG5953 gene product from transcript CG5953-RA	-0.66594	4.96456	-6.54406	1.02654e-06	0.000111703	5.57649
78	23	0	CUST_25632_PI428323385	CG42233	Probe	43754	CG42233	CG42233 gene product from transcript CG42233-RB	-0.750465	6.47752	-6.54371	1.02738e-06	0.000111703	5.57568
53	94	0	CUST_12434_PI428323385	CG17332	Probe	34997	VhaSFD	Vacuolar H[+]-ATPase SFD subunit	0.481342	11.0697	6.54218	1.03109e-06	0.000111819	5.5721
101	105	0	CUST_11808_PI428323385	CG1702	Probe	33047	CG1702	CG1702 gene product from transcript CG1702-RB	-0.852914	10.5765	-6.53665	1.04467e-06	0.000113001	5.55911
183	37	0	CUST_5823_PI428323385	CG12908	Probe	36089	Ndg	Nidogen/entactin	-1.03404	4.78522	-6.53508	1.04854e-06	0.000113087	5.55543
28	70	0	CUST_14586_PI428323385	CG1868	Probe	35985	CG1868	CG1868 gene product from transcript CG1868-RB	-0.449475	10.772	-6.53416	1.05083e-06	0.000113087	5.55327
197	41	0	CUST_8747_PI428323385	CG14534	Probe	34075	TwdlE	TweedleE	-0.608224	8.70371	-6.53151	1.05743e-06	0.000113508	5.54706
58	80	0	CUST_4336_PI428323385	CG12047	Probe	44839	mud	mushroom body defect	0.600667	6.14692	6.52026	1.08591e-06	0.000115836	5.52066
130	56	0	CUST_2650_PI428323385	CG11155	Probe	43822	CG11155	CG11155 gene product from transcript CG11155-RA	-0.986202	5.89231	-6.51983	1.08701e-06	0.000115836	5.51966
355	27	0	CUST_28028_PI428323385	CG43079	Probe	40515	nrm	neuromusculin	1.28473	6.30907	6.5197	1.08736e-06	0.000115836	5.51934
209	96	0	CUST_4856_PI428323385	CG12275	Probe	43321	RpS10a	Ribosomal protein S10a	0.71959	5.20843	6.51133	1.10908e-06	0.000117853	5.4997
205	122	0	CUST_31915_PI428323385	CG5451	Probe	42272	CG5451	CG5451 gene product from transcript CG5451-RB	0.628391	10.8769	6.50987	1.11292e-06	0.000117964	5.49627
45	1	0	CUST_35768_PI428323385	CG7154	Probe	34062	CG7154	CG7154 gene product from transcript CG7154-RA	-0.788381	8.97133	-6.50576	1.12378e-06	0.000118816	5.48663
93	132	0	CUST_35568_PI428323385	CG7080	Probe	42609	CG7080	CG7080 gene product from transcript CG7080-RA	-1.16139	5.95313	-6.5035	1.12982e-06	0.000119157	5.4813
204	55	0	CUST_5972_PI428323385	CG1299	Probe	38496	CG1299	CG1299 gene product from transcript CG1299-RA	-0.990378	8.89488	-6.49846	1.14338e-06	0.000120285	5.46946
274	33	0	CUST_34774_PI428323385	CG6754	Probe	44259	nbs	CG6754 gene product from transcript CG6754-RD	-0.533353	10.9959	-6.48827	1.17128e-06	0.000122914	5.44552
89	164	0	CUST_21032_PI428323385	CG33048	Probe	39238	Mocs1	Molybdenum cofactor synthesis 1 ortholog	-0.887094	7.15941	-6.47178	1.21793e-06	0.000127204	5.40674
70	5	0	CUST_15759_PI428323385	CG2560	Probe	32198	Cpr11A	Cuticular protein 11A	-0.971544	5.70632	-6.47003	1.22299e-06	0.000127204	5.40262
248	67	0	CUST_28983_PI428323385	CG4364	Probe	34287	CG4364	CG4364 gene product from transcript CG4364-RA	-0.442871	13.2132	-6.46962	1.22417e-06	0.000127204	5.40166
85	89	0	CUST_15151_PI428323385	CG2064	Probe	35708	CG2064	CG2064 gene product from transcript CG2064-RA	-0.784159	9.20036	-6.46961	1.22422e-06	0.000127204	5.40163
102	125	0	CUST_36012_PI428323385	CG7266	Probe	39675	Eip71CD	Ecdysone-induced protein 28/29kD	-0.591144	10.3569	-6.46587	1.2351e-06	0.00012802	5.39284
158	113	0	CUST_10258_PI428323385	CG15347	Probe	31779	CG15347	CG15347 gene product from transcript CG15347-RA	-2.15112	5.93888	-6.46288	1.24391e-06	0.000128616	5.38578
153	137	0	CUST_33076_PI428323385	CG5988	Probe	32805	upd2	unpaired 2	-0.681071	5.2039	-6.44806	1.28837e-06	0.000132888	5.35091
35	18	0	CUST_13278_PI428323385	CG17803	Probe	42141	CG17803	CG17803 gene product from transcript CG17803-RA	-1.24482	6.16142	-6.42508	1.36064e-06	0.000139999	5.29673
214	54	0	CUST_5974_PI428323385	CG1299	Probe	38496	CG1299	CG1299 gene product from transcript CG1299-RA	-0.980201	8.88448	-6.41081	1.40755e-06	0.000144475	5.26307
60	31	0	CUST_12754_PI428323385	CG17574	Probe	36415	CG17574	CG17574 gene product from transcript CG17574-RA	-0.64195	9.53701	-6.40858	1.41503e-06	0.000144889	5.25781
285	85	0	CUST_17321_PI428323385	CG31006	Probe	43683	stops	slow termination of phototransduction	-0.730853	6.03369	-6.40158	1.43876e-06	0.000146962	5.2413
325	67	0	CUST_35567_PI428323385	CG7080	Probe	42609	CG7080	CG7080 gene product from transcript CG7080-RA	-1.26209	6.47004	-6.39887	1.44808e-06	0.000147557	5.23488
269	32	0	CUST_2838_PI428323385	CG11253	Probe	39481	CG11253	CG11253 gene product from transcript CG11253-RA	0.976848	7.97216	6.39538	1.46015e-06	0.000148429	5.22664
218	111	0	CUST_33871_PI428323385	CG6339	Probe	37564	rad50	CG6339 gene product from transcript CG6339-RE	-0.674107	11.9191	-6.37931	1.51704e-06	0.000153644	5.18869
247	73	0	CUST_17088_PI428323385	CG30457	Probe	36940	CG30457	CG30457 gene product from transcript CG30457-RA	-0.788118	6.17462	-6.37816	1.52123e-06	0.000153644	5.18596
151	113	0	CUST_20428_PI428323385	CG32581	Probe	318098	CG32581	CG32581 gene product from transcript CG32581-RB	-1.27951	8.8938	-6.37784	1.52238e-06	0.000153644	5.1852
144	90	0	CUST_16152_PI428323385	CG2909	Probe	31958	CG2909	CG2909 gene product from transcript CG2909-RA	-1.18177	6.70216	-6.37567	1.53026e-06	0.000154071	5.18008
46	133	0	CUST_8327_PI428323385	CG14304	Probe	42232	CG14304	CG14304 gene product from transcript CG14304-RA	-1.0902	8.55343	-6.37364	1.53769e-06	0.000154197	5.17527
152	113	0	CUST_30847_PI428323385	CG4920	Probe	41858	ea	easter	-1.00995	10.8905	-6.37332	1.53883e-06	0.000154197	5.17454
335	162	0	CUST_2120_PI428323385	CG10916	Probe	37081	CG10916	CG10916 gene product from transcript CG10916-RA	-0.807964	7.54881	-6.36648	1.56411e-06	0.000156359	5.15836
97	28	0	CUST_29430_PI428323385	CG4381	Probe	48336	GstD3	Glutathione S transferase D3	-0.753742	12.3962	-6.35448	1.60948e-06	0.000160514	5.12997
92	50	0	CUST_32068_PI428323385	CG5519	Probe	37123	Prp19	CG5519 gene product from transcript CG5519-RA	0.454155	12.735	6.35148	1.62105e-06	0.000161287	5.12286
359	116	0	CUST_15447_PI428323385	CG2210	Probe	43739	awd	abnormal wing discs	0.876691	12.0092	6.34742	1.63678e-06	0.000162468	5.11327
153	118	0	CUST_3976_PI428323385	CG11856	Probe	43041	Nup358	Nucleoporin 358	-0.607739	10.5071	-6.34409	1.64983e-06	0.00016338	5.10538
186	107	0	CUST_532_PI428323385	CG10236	Probe	38723	LanA	Laminin A	-0.696892	12.3636	-6.33629	1.6808e-06	0.000166057	5.08692
89	54	0	CUST_13706_PI428323385	CG18069	Probe	43828	CaMKII	Calcium/calmodulin-dependent protein kinase II	-0.68326	11.1176	-6.33339	1.69247e-06	0.000166819	5.08005
74	27	0	CUST_16182_PI428323385	CG2924	Probe	31214	CG2924	CG2924 gene product from transcript CG2924-RA	-0.845022	8.26905	-6.32822	1.71348e-06	0.000168496	5.0678
20	37	0	CUST_33531_PI428323385	CG6185	Probe	39269	Ir68a	Ionotropic receptor 68a	-0.778023	6.7163	-6.32573	1.72371e-06	0.000169108	5.06189
297	116	0	CUST_28021_PI428323385	CG43079	Probe	40515	nrm	neuromusculin	1.12185	6.24381	6.32472	1.72785e-06	0.000169121	5.05951
14	36	0	CUST_25081_PI428323385	CG40300	Probe	3355150	2003-08-01	Argonaute 3	-0.907383	5.49799	-6.29698	1.84621e-06	0.000180288	4.99374
218	143	0	CUST_344_PI428323385	CG10151	Probe	36639	CG10151	CG10151 gene product from transcript CG10151-RA	-0.697389	7.33956	-6.2896	1.87905e-06	0.000183071	4.97623
264	125	0	CUST_3117_PI428323385	CG11372	Probe	33162	galectin	CG11372 gene product from transcript CG11372-RD	-0.529484	11.5001	-6.28118	1.91728e-06	0.000186365	4.95624
20	69	0	CUST_16659_PI428323385	CG30170	Probe	47873	bgcn	benign gonial cell neoplasm	-0.7257	6.3131	-6.27622	1.94017e-06	0.000188157	4.94445
372	78	0	CUST_11806_PI428323385	CG1702	Probe	33047	CG1702	CG1702 gene product from transcript CG1702-RB	-0.909158	10.6056	-6.26889	1.97451e-06	0.00019092	4.92704
97	103	0	CUST_20348_PI428323385	CG32549	Probe	32822	CG32549	CG32549 gene product from transcript CG32549-RD	-0.798629	5.46571	-6.26821	1.97772e-06	0.00019092	4.92543
40	70	0	CUST_12872_PI428323385	CG17657	Probe	33349	frtz	fritz	0.46583	9.79142	6.26671	1.98482e-06	0.000191089	4.92187
100	80	0	CUST_29715_PI428323385	CG4404	Probe	32241	CG4404	CG4404 gene product from transcript CG4404-RA	-0.777332	5.77294	-6.26593	1.98853e-06	0.000191089	4.92002
216	7	0	CUST_11805_PI428323385	CG1702	Probe	33047	CG1702	CG1702 gene product from transcript CG1702-RB	-0.943486	10.8169	-6.26191	2.00778e-06	0.000192501	4.91045
29	85	0	CUST_1270_PI428323385	CG1058	Probe	40580	rpk	ripped pocket	-0.996379	8.36465	-6.25457	2.04334e-06	0.000195465	4.89303
288	82	0	CUST_19929_PI428323385	CG32409	Probe	318016	CG32409	CG32409 gene product from transcript CG32409-RA	0.693376	10.6642	6.25258	2.0531e-06	0.000195955	4.8883
271	83	0	CUST_1000_PI428323385	CG10460	Probe	37229	cer	crammer	-0.852963	11.5904	-6.23605	2.13607e-06	0.000203414	4.84897
102	55	0	CUST_5317_PI428323385	CG12559	Probe	3354888	rl	rolled	-0.498149	9.74375	-6.22738	2.18091e-06	0.000207216	4.82835
100	99	0	CUST_8330_PI428323385	CG14304	Probe	42232	CG14304	CG14304 gene product from transcript CG14304-RA	-0.834726	7.65427	-6.22619	2.18714e-06	0.000207341	4.82552
260	38	0	CUST_39490_PI428323385	CG8799	Probe	47905	l(2)03659	lethal (2) 03659	-0.868869	8.83635	-6.22222	2.20806e-06	0.000208855	4.81606
58	154	0	CUST_11820_PI428323385	CG17023	Probe	3354919	Dbp80	Dead box protein 80	-0.708629	7.37951	-6.21186	2.26363e-06	0.000213632	4.7914
245	120	0	CUST_531_PI428323385	CG10236	Probe	38723	LanA	Laminin A	-0.720405	13.5406	-6.21075	2.26968e-06	0.000213725	4.78874
13	30	0	CUST_20826_PI428323385	CG3280	Probe	39117	CG3280	CG3280 gene product from transcript CG3280-RD	-0.931123	7.43857	-6.20568	2.29743e-06	0.000215856	4.77668
221	17	0	CUST_28485_PI428323385	CG43265	Probe	12798315	CG43265	CG43265 gene product from transcript CG43265-RA	-0.722651	6.31184	-6.18528	2.41281e-06	0.000226193	4.72804
123	79	0	CUST_10920_PI428323385	CG15784	Probe	31461	CG15784	CG15784 gene product from transcript CG15784-RA	-2.89797	10.8286	-6.17805	2.45507e-06	0.000229644	4.71081
75	128	0	CUST_32469_PI428323385	CG5704	Probe	48613	CG5704	CG5704 gene product from transcript CG5704-RA	0.588787	9.61532	6.17625	2.46574e-06	0.000229926	4.70651
291	90	0	CUST_36438_PI428323385	CG7457	Probe	38865	CG7457	CG7457 gene product from transcript CG7457-RA	-0.453361	8.98273	-6.1757	2.46898e-06	0.000229926	4.7052
50	157	0	CUST_2441_PI428323385	CG11066	Probe	35505	scaf	scarface	-0.845107	8.97083	-6.16804	2.5149e-06	0.000233686	4.68691
54	52	0	CUST_17320_PI428323385	CG31006	Probe	43683	stops	slow termination of phototransduction	-0.762951	5.75495	-6.16513	2.5325e-06	0.000234805	4.67999
315	21	0	CUST_6101_PI428323385	CG13060	Probe	39802	CG13060	CG13060 gene product from transcript CG13060-RA	-1.14107	8.11262	-6.1542	2.6e-06	0.0002403	4.65388
50	158	0	CUST_33015_PI428323385	CG5953	Probe	34985	CG5953	CG5953 gene product from transcript CG5953-RA	-0.561954	4.98345	-6.15369	2.60316e-06	0.0002403	4.65268
235	164	0	CUST_33039_PI428323385	CG5966	Probe	31532	CG5966	CG5966 gene product from transcript CG5966-RA	-1.02585	6.69571	-6.1517	2.61565e-06	0.000240925	4.64793
9	100	0	CUST_6848_PI428323385	CG1349	Probe	43652	dj-1beta	CG1349 gene product from transcript CG1349-RA	0.533419	12.7564	6.14943	2.62999e-06	0.000241719	4.6425
137	24	0	CUST_41083_PI428323385	CG9521	Probe	32414	CG9521	CG9521 gene product from transcript CG9521-RA	-1.00516	6.04906	-6.13702	2.70974e-06	0.000248507	4.61285
280	92	0	CUST_1267_PI428323385	CG1058	Probe	40580	rpk	ripped pocket	-1.00749	8.20135	-6.12699	2.776e-06	0.000254031	4.58888
9	81	0	CUST_25342_PI428323385	CG4115	Probe	41499	CG4115	CG4115 gene product from transcript CG4115-RA	0.625869	10.0092	6.12227	2.80777e-06	0.000256382	4.57758
264	73	0	CUST_12581_PI428323385	CG1745	Probe	32090	HP5	Heterochromatin protein 5	0.834972	9.22502	6.1165	2.84709e-06	0.000259411	4.56378
378	150	0	CUST_1177_PI428323385	CG10539	Probe	38654	S6k	RPS6-p70-protein kinase	0.838109	9.75494	6.11204	2.87783e-06	0.000261311	4.55312
52	91	0	CUST_36098_PI428323385	CG7314	Probe	39322	Bmcp	CG7314 gene product from transcript CG7314-RB	-0.846539	7.32223	-6.11168	2.88033e-06	0.000261311	4.55226
21	86	0	CUST_29606_PI428323385	CG43946	Probe	NA	NA	NA	0.511882	7.66239	6.10891	2.89962e-06	0.000262496	4.54564
124	39	0	CUST_346_PI428323385	CG10151	Probe	36639	CG10151	CG10151 gene product from transcript CG10151-RA	-0.691262	7.35001	-6.08744	3.05369e-06	0.000275573	4.49426
325	83	0	CUST_11693_PI428323385	CG16959	Probe	39648	CG16959	CG16959 gene product from transcript CG16959-RB	0.51369	10.1933	6.08698	3.05713e-06	0.000275573	4.49314
100	51	0	CUST_13702_PI428323385	CG18069	Probe	43828	CaMKII	Calcium/calmodulin-dependent protein kinase II	-0.652495	11.1224	-6.08088	3.10245e-06	0.000278506	4.47854
155	149	0	CUST_795_PI428323385	CG10344	Probe	37565	CG10344	CG10344 gene product from transcript CG10344-RA	1.10196	7.10454	6.08082	3.10288e-06	0.000278506	4.4784
138	125	0	CUST_35803_PI428323385	CG7173	Probe	40392	CG7173	CG7173 gene product from transcript CG7173-RA	-0.686985	9.36902	-6.07247	3.16609e-06	0.000283577	4.45839
34	80	0	CUST_18403_PI428323385	CG31628	Probe	33986	ade3	adenosine 3	0.602266	12.19	6.06871	3.19495e-06	0.000285555	4.44939
136	72	0	CUST_7518_PI428323385	CG13897	Probe	38090	CG13897	CG13897 gene product from transcript CG13897-RA	1.02044	7.92594	6.0644	3.2284e-06	0.000287935	4.43905
168	7	0	CUST_6773_PI428323385	CG13436	Probe	37334	CG13436	CG13436 gene product from transcript CG13436-RA	-0.879418	7.35863	-6.05007	3.34215e-06	0.000297451	4.40469
311	93	0	CUST_34526_PI428323385	CG6656	Probe	42576	CG6656	CG6656 gene product from transcript CG6656-RA	0.458793	9.93215	6.04782	3.36041e-06	0.000298447	4.39928
137	134	0	CUST_4698_PI428323385	CG12199	Probe	32930	kek5	kekkon5	-0.516906	9.7207	-6.04483	3.38477e-06	0.000299979	4.39212
11	101	0	CUST_19177_PI428323385	CG32029	Probe	38990	Cpr66D	Cuticular protein 66D	-0.85612	9.82804	-6.04265	3.40264e-06	0.000300931	4.38689
227	143	0	CUST_17150_PI428323385	CG3048	Probe	33638	Traf4	TNF-receptor-associated factor 4	-0.419955	9.01139	-6.0401	3.42365e-06	0.000302155	4.38078
105	163	0	CUST_9720_PI428323385	CG1504	Probe	33028	CG1504	CG1504 gene product from transcript CG1504-RB	-0.645681	5.17006	-6.03805	3.44067e-06	0.000303023	4.37586
226	109	0	CUST_20847_PI428323385	CG32809	Probe	31121	CG32809	CG32809 gene product from transcript CG32809-RG	-0.55357	7.03433	-6.02482	3.55263e-06	0.000312232	4.34409
245	46	0	CUST_23578_PI428323385	CG34405	Probe	37981	NaCP60E	Na channel protein 60E	-0.539686	7.13501	-6.00747	3.70497e-06	0.000324943	4.30243
60	39	0	CUST_16223_PI428323385	CG2948	Probe	40677	rev7	CG2948 gene product from transcript CG2948-RA	-0.749557	8.76671	-6.00401	3.73614e-06	0.000326997	4.29412
281	25	0	CUST_23571_PI428323385	CG34405	Probe	37981	NaCP60E	Na channel protein 60E	-0.535317	7.1189	-5.99962	3.77606e-06	0.000329807	4.28357
6	91	0	CUST_8804_PI428323385	CG14567	Probe	40420	CG14567	CG14567 gene product from transcript CG14567-RA	0.750012	8.71814	5.99536	3.81528e-06	0.000332545	4.27332
77	52	0	CUST_25381_PI428323385	CG41265	Probe	5740691	l(2)41Ab	lethal (2) 41Ab	-0.769528	6.38954	-5.9941	3.82688e-06	0.000332867	4.27031
52	152	0	CUST_7517_PI428323385	CG13897	Probe	38090	CG13897	CG13897 gene product from transcript CG13897-RA	0.918786	7.84288	5.98512	3.91106e-06	0.00033949	4.24872
72	33	0	CUST_9070_PI428323385	CG14709	Probe	41387	Mrp4	Multidrug resistance protein 4 ortholog	-0.522401	5.63311	-5.98318	3.9295e-06	0.00034039	4.24405
177	147	0	CUST_15153_PI428323385	CG2065	Probe	35707	CG2065	CG2065 gene product from transcript CG2065-RA	-1.34808	4.72207	-5.98164	3.94425e-06	0.000340968	4.24034
61	87	0	CUST_343_PI428323385	CG10151	Probe	36639	CG10151	CG10151 gene product from transcript CG10151-RA	-0.52457	7.57178	-5.98015	3.95851e-06	0.000341501	4.23676
299	91	0	CUST_30711_PI428323385	CG4880	Probe	32680	CG4880	CG4880 gene product from transcript CG4880-RA	0.521676	10.2548	5.97661	3.99263e-06	0.000343741	4.22824
186	141	0	CUST_23568_PI428323385	CG34405	Probe	37981	NaCP60E	Na channel protein 60E	-0.527665	7.09909	-5.9717	4.0405e-06	0.000347154	4.21642
13	145	0	CUST_24209_PI428323385	CG3653	Probe	31292	kirre	kin of irre	-0.658144	8.80677	-5.96825	4.07443e-06	0.000349357	4.20812
383	37	0	CUST_36184_PI428323385	CG7356	Probe	34093	Tg	Transglutaminase	-0.784492	5.38899	-5.96425	4.11416e-06	0.000352048	4.1985
320	92	0	CUST_22684_PI428323385	CG34057	Probe	3885645	CG34057	CG34057 gene product from transcript CG34057-RA	-0.634459	5.72527	-5.96286	4.12804e-06	0.000352521	4.19515
294	119	0	CUST_40652_PI428323385	CG9328	Probe	35344	CG9328	CG9328 gene product from transcript CG9328-RB	-0.835324	9.61848	-5.96107	4.14604e-06	0.000353343	4.19084
91	137	0	CUST_2834_PI428323385	CG11249	Probe	40409	CG11249	CG11249 gene product from transcript CG11249-RA	-0.663205	5.52074	-5.95703	4.18688e-06	0.000356104	4.18111
27	55	0	CUST_13696_PI428323385	CG18069	Probe	43828	CaMKII	Calcium/calmodulin-dependent protein kinase II	-0.742832	11.0997	-5.94957	4.26329e-06	0.000361874	4.16317
186	15	0	CUST_40391_PI428323385	CG9214	Probe	32574	Tob	CG9214 gene product from transcript CG9214-RA	-1.50344	5.81681	-5.93032	4.46734e-06	0.000378432	4.11679
320	121	0	CUST_39407_PI428323385	CG8768	Probe	36400	CG8768	CG8768 gene product from transcript CG8768-RA	0.873996	8.70458	5.92855	4.48664e-06	0.000379306	4.11252
94	132	0	CUST_16856_PI428323385	CG30330	Probe	117343	Gr59d	Gustatory receptor 59d	-0.712923	4.58503	-5.92392	4.53734e-06	0.000382824	4.10137
345	45	0	CUST_11845_PI428323385	CG17044	Probe	41652	yellow-e2	CG17044 gene product from transcript CG17044-RB	0.56219	10.53	5.92132	4.56615e-06	0.000384486	4.09509
123	97	0	CUST_16181_PI428323385	CG2924	Probe	31214	CG2924	CG2924 gene product from transcript CG2924-RA	-0.937315	8.00698	-5.90843	4.71149e-06	0.000395934	4.06401
331	25	0	CUST_3122_PI428323385	CG11372	Probe	33162	galectin	CG11372 gene product from transcript CG11372-RD	-0.465676	11.3776	-5.90359	4.76726e-06	0.000399566	4.05234
140	30	0	CUST_23577_PI428323385	CG34405	Probe	37981	NaCP60E	Na channel protein 60E	-0.441287	7.11243	-5.90304	4.77365e-06	0.000399566	4.05101
382	130	0	CUST_18339_PI428323385	CG3158	Probe	41919	spn-E	spindle E	-0.741107	8.45931	-5.88809	4.95054e-06	0.000413551	4.01492
269	18	0	CUST_14120_PI428323385	CG18343	Probe	36297	CG18343	CG18343 gene product from transcript CG18343-RA	0.529344	12.8349	5.8807	5.04038e-06	0.000420224	3.99708
100	59	0	CUST_20347_PI428323385	CG32549	Probe	32822	CG32549	CG32549 gene product from transcript CG32549-RD	-0.93813	5.4572	-5.87288	5.13718e-06	0.000426823	3.97822
79	87	0	CUST_20025_PI428323385	CG32448	Probe	318032	CG32448	CG32448 gene product from transcript CG32448-RC	0.635308	10.283	5.87268	5.13976e-06	0.000426823	3.97772
344	64	0	CUST_36894_PI428323385	CG7695	Probe	42234	CG7695	CG7695 gene product from transcript CG7695-RA	-0.783285	5.24353	-5.86943	5.18057e-06	0.000429366	3.96987
296	110	0	CUST_32363_PI428323385	CG5664	Probe	40371	CG5664	CG5664 gene product from transcript CG5664-RA	-0.505782	9.88865	-5.86648	5.21789e-06	0.000431611	3.96276
81	78	0	CUST_29169_PI428323385	CG4373	Probe	37594	Cyp6d2	CG4373 gene product from transcript CG4373-RA	-1.80686	7.08644	-5.8648	5.23929e-06	0.000432533	3.9587
215	133	0	CUST_20860_PI428323385	CG32809	Probe	31121	CG32809	CG32809 gene product from transcript CG32809-RG	-0.544747	6.92419	-5.8613	5.28422e-06	0.000435391	3.95023
57	48	0	CUST_16368_PI428323385	CG30016	Probe	246393	CG30016	CG30016 gene product from transcript CG30016-RA	0.80401	7.7472	5.85979	5.30365e-06	0.000436026	3.94659
176	136	0	CUST_40489_PI428323385	CG9252	Probe	35380	del	deadlock	-0.814841	9.83269	-5.8591	5.31259e-06	0.000436026	3.94492
102	107	0	CUST_3643_PI428323385	CG11658	Probe	39319	CG11658	CG11658 gene product from transcript CG11658-RC	-0.583362	5.00592	-5.85277	5.39512e-06	0.000441939	3.92963
336	103	0	CUST_12741_PI428323385	CG17574	Probe	36415	CG17574	CG17574 gene product from transcript CG17574-RA	-0.711046	8.48149	-5.84981	5.43425e-06	0.000444282	3.92246
47	108	0	CUST_35190_PI428323385	CG6936	Probe	38058	mth	methuselah	-0.433261	12.0907	-5.84726	5.46816e-06	0.000446189	3.91629
12	127	0	CUST_999_PI428323385	CG10460	Probe	37229	cer	crammer	-0.879132	11.4811	-5.83819	5.59043e-06	0.000454636	3.89436
159	36	0	CUST_33018_PI428323385	CG5953	Probe	34985	CG5953	CG5953 gene product from transcript CG5953-RA	-0.660198	4.79186	-5.83798	5.59324e-06	0.000454636	3.89386
323	39	0	CUST_32660_PI428323385	CG5792	Probe	34685	CG5792	CG5792 gene product from transcript CG5792-RA	-0.637024	10.1939	-5.83661	5.61196e-06	0.000455281	3.89055
355	37	0	CUST_27706_PI428323385	CG42806	Probe	10178814	CG42806	CG42806 gene product from transcript CG42806-RB	-0.553929	12.6681	-5.82968	5.70765e-06	0.000462155	3.87378
108	91	0	CUST_23574_PI428323385	CG34405	Probe	37981	NaCP60E	Na channel protein 60E	-0.538127	7.17564	-5.82607	5.75814e-06	0.00046535	3.86505
237	56	0	CUST_637_PI428323385	CG10279	Probe	40739	Rm62	CG10279 gene product from transcript CG10279-RK	-0.498335	14.0724	-5.82197	5.81606e-06	0.000468519	3.85512
243	147	0	CUST_29629_PI428323385	CG43946	Probe	NA	NA	NA	0.597167	8.7237	5.82172	5.81956e-06	0.000468519	3.85453
274	58	0	CUST_21029_PI428323385	CG33048	Probe	39238	Mocs1	Molybdenum cofactor synthesis 1 ortholog	-0.795337	6.70308	-5.81378	5.93351e-06	0.000476783	3.8353
349	47	0	CUST_34527_PI428323385	CG6656	Probe	42576	CG6656	CG6656 gene product from transcript CG6656-RA	0.527621	9.32375	5.81253	5.95158e-06	0.000477325	3.83229
3	94	0	CUST_31108_PI428323385	CG5029	Probe	34396	SamDC	S-adenosylmethionine decarboxylase	-0.651503	8.87499	-5.80598	6.04757e-06	0.000484104	3.81642
73	63	0	CUST_14417_PI428323385	CG18542	Probe	41176	CG18542	CG18542 gene product from transcript CG18542-RA	-0.507044	10.1947	-5.80369	6.08147e-06	0.000485896	3.81088
141	116	0	CUST_794_PI428323385	CG10344	Probe	37565	CG10344	CG10344 gene product from transcript CG10344-RA	1.04148	7.05473	5.8004	6.13049e-06	0.000488886	3.80292
302	19	0	CUST_22685_PI428323385	CG34057	Probe	3885645	CG34057	CG34057 gene product from transcript CG34057-RA	-0.807782	5.50422	-5.79832	6.16166e-06	0.000489799	3.79789
11	20	0	CUST_19596_PI428323385	CG32196	Probe	317908	CG32196	CG32196 gene product from transcript CG32196-RB	-0.468795	5.32788	-5.79809	6.16515e-06	0.000489799	3.79733
128	51	0	CUST_5946_PI428323385	CG12972	Probe	40363	ebd2	earthbound 2	-0.464133	7.73581	-5.79324	6.23871e-06	0.000494711	3.78557
239	105	0	CUST_4731_PI428323385	CG12210	Probe	36080	Syb	Synaptobrevin	-0.572736	8.32082	-5.79098	6.27324e-06	0.000496516	3.78009
210	125	0	CUST_33341_PI428323385	CG6117	Probe	39733	Pka-C3	cAMP-dependent protein kinase 3	-0.54061	9.06108	-5.78796	6.31965e-06	0.000499252	3.77278
67	65	0	CUST_35188_PI428323385	CG6936	Probe	38058	mth	methuselah	-0.504214	12.2462	-5.7802	6.44064e-06	0.000507859	3.75398
103	95	0	CUST_8696_PI428323385	CG14502	Probe	37092	CG14502	CG14502 gene product from transcript CG14502-RC	-0.795322	5.08338	-5.77922	6.45604e-06	0.000508124	3.75161
74	86	0	CUST_37355_PI428323385	CG7916	Probe	34800	CG7916	CG7916 gene product from transcript CG7916-RA	1.06315	5.2983	5.77269	6.56003e-06	0.000515347	3.73577
314	71	0	CUST_20120_PI428323385	CG32476	Probe	318046	mthl14	methuselah-like 14	-0.749532	5.50284	-5.77167	6.57635e-06	0.000515669	3.73331
239	53	0	CUST_641_PI428323385	CG10279	Probe	40739	Rm62	CG10279 gene product from transcript CG10279-RK	-0.481721	14.0957	-5.77077	6.59079e-06	0.000515842	3.73113
43	52	0	CUST_17901_PI428323385	CG31262	Probe	318649	CG31262	CG31262 gene product from transcript CG31262-RB	1.04976	5.06934	5.76926	6.61525e-06	0.000516798	3.72746
140	159	0	CUST_25015_PI428323385	CG40160	Probe	3354965	CG40160	CG40160 gene product from transcript CG40160-RE	-0.473205	13.137	-5.76833	6.63028e-06	0.000517015	3.72521
335	62	0	CUST_39563_PI428323385	CG8833	Probe	39535	CG8833	CG8833 gene product from transcript CG8833-RA	-0.954746	8.21674	-5.75622	6.82955e-06	0.00053157	3.69585
85	39	0	CUST_10259_PI428323385	CG15347	Probe	31779	CG15347	CG15347 gene product from transcript CG15347-RA	-1.91075	5.95025	-5.75103	6.91681e-06	0.000536648	3.68327
134	21	0	CUST_33873_PI428323385	CG6339	Probe	37564	rad50	CG6339 gene product from transcript CG6339-RE	-0.629136	11.8248	-5.75083	6.92022e-06	0.000536648	3.68278
294	60	0	CUST_24356_PI428323385	CG3714	Probe	33626	CG3714	CG3714 gene product from transcript CG3714-RC	-0.526309	8.17022	-5.74589	7.00445e-06	0.00054135	3.67078
372	108	0	CUST_796_PI428323385	CG10344	Probe	37565	CG10344	CG10344 gene product from transcript CG10344-RA	0.987117	6.59707	5.74577	7.00652e-06	0.00054135	3.67049
381	54	0	CUST_30622_PI428323385	CG4839	Probe	34348	CG4839	CG4839 gene product from transcript CG4839-RB	0.836172	5.46646	5.72996	7.2831e-06	0.000561691	3.63211
246	127	0	CUST_10706_PI428323385	CG15623	Probe	33360	c-cup	calcutta cup	-1.28718	4.91391	-5.72613	7.35163e-06	0.000565942	3.62283
51	124	0	CUST_13708_PI428323385	CG18069	Probe	43828	CaMKII	Calcium/calmodulin-dependent protein kinase II	-0.662011	11.0995	-5.72532	7.3662e-06	0.00056603	3.62086
78	20	0	CUST_33355_PI428323385	CG6122	Probe	34521	piwi	CG6122 gene product from transcript CG6122-RA	-0.800058	6.49223	-5.72434	7.384e-06	0.000566366	3.61847
172	126	0	CUST_37423_PI428323385	CG7943	Probe	43574	CG7943	CG7943 gene product from transcript CG7943-RB	0.501569	9.31347	5.72298	7.4086e-06	0.000567221	3.61518
320	39	0	CUST_10308_PI428323385	CG15385	Probe	33396	CG15385	CG15385 gene product from transcript CG15385-RA	-0.828127	5.64969	-5.71643	7.52841e-06	0.00057535	3.59927
314	11	0	CUST_6654_PI428323385	CG13380	Probe	40029	CG13380	CG13380 gene product from transcript CG13380-RB	-0.716066	5.40117	-5.71108	7.6278e-06	0.000581892	3.58627
67	102	0	CUST_35189_PI428323385	CG6936	Probe	38058	mth	methuselah	-0.363832	12.7513	-5.70888	7.6691e-06	0.000583987	3.58092
18	101	0	CUST_17149_PI428323385	CG3048	Probe	33638	Traf4	TNF-receptor-associated factor 4	-0.393687	9.41645	-5.69708	7.89411e-06	0.000600038	3.55226
59	125	0	CUST_15154_PI428323385	CG2065	Probe	35707	CG2065	CG2065 gene product from transcript CG2065-RA	-1.00167	4.83195	-5.69016	8.0292e-06	0.000609208	3.53544
229	31	0	CUST_39714_PI428323385	CG8908	Probe	37293	CG8908	CG8908 gene product from transcript CG8908-RB	-0.757525	6.67931	-5.67542	8.32493e-06	0.000630512	3.49959
32	122	0	CUST_33899_PI428323385	CG6353	Probe	42551	CG6353	CG6353 gene product from transcript CG6353-RA	-0.473478	11.4997	-5.65288	8.79849e-06	0.000665185	3.44476
144	133	0	CUST_19544_PI428323385	CG32172	Probe	43918	noe	CG32172 gene product from transcript CG32172-RC	-0.761796	10.6578	-5.64389	8.99501e-06	0.000677939	3.42287
7	125	0	CUST_38251_PI428323385	CG8262	Probe	35878	ana2	anastral spindle 2	0.509822	10.882	5.64362	9.00086e-06	0.000677939	3.42223
342	163	0	CUST_20344_PI428323385	CG32549	Probe	32822	CG32549	CG32549 gene product from transcript CG32549-RD	-0.501183	5.67753	-5.64297	9.01541e-06	0.000677939	3.42063
346	51	0	CUST_23873_PI428323385	CG3492	Probe	37902	CG3492	CG3492 gene product from transcript CG3492-RA	-1.01313	4.76735	-5.6419	9.03901e-06	0.000678505	3.41804
365	106	0	CUST_6653_PI428323385	CG13380	Probe	40029	CG13380	CG13380 gene product from transcript CG13380-RB	-0.969189	5.39407	-5.63881	9.10786e-06	0.000682459	3.41052
96	130	0	CUST_13699_PI428323385	CG18069	Probe	43828	CaMKII	Calcium/calmodulin-dependent protein kinase II	-0.58854	10.8425	-5.62742	9.36649e-06	0.000699238	3.38277
213	49	0	CUST_20000_PI428323385	CG32441	Probe	40396	CG32441	CG32441 gene product from transcript CG32441-RD	0.571809	12.6892	5.62697	9.37677e-06	0.000699238	3.38168
298	126	0	CUST_36011_PI428323385	CG7266	Probe	39675	Eip71CD	Ecdysone-induced protein 28/29kD	-0.581614	10.334	-5.62677	9.38152e-06	0.000699238	3.38118
200	54	0	CUST_14023_PI428323385	CG18278	Probe	36487	CG18278	CG18278 gene product from transcript CG18278-RA	-0.929257	10.4896	-5.62546	9.41169e-06	0.00070025	3.378
78	114	0	CUST_1640_PI428323385	CG10704	Probe	39418	toe	twin of eyg	-0.417295	11.5309	-5.6246	9.43168e-06	0.000700501	3.3759
24	122	0	CUST_11483_PI428323385	CG16800	Probe	34693	CG16800	CG16800 gene product from transcript CG16800-RB	-0.719512	6.35483	-5.6218	9.49683e-06	0.000704101	3.36908
13	157	0	CUST_21497_PI428323385	CG33226	Probe	2768859	CG33226	CG33226 gene product from transcript CG33226-RC	-0.468288	5.56562	-5.61341	9.6948e-06	0.000717517	3.34863
176	9	0	CUST_11388_PI428323385	CG16757	Probe	46194	Spn	Spinophilin	0.485115	6.95591	5.60775	9.83063e-06	0.000725806	3.33485
317	7	0	CUST_15428_PI428323385	CG2201	Probe	35417	CG2201	CG2201 gene product from transcript CG2201-RF	-0.4824	7.60355	-5.60732	9.8412e-06	0.000725806	3.33378
296	68	0	CUST_25152_PI428323385	CG40452	Probe	3355084	Snap25	Synapse protein 25	-0.893883	5.16133	-5.59828	1.00625e-05	0.000740831	3.31175
59	38	0	CUST_11692_PI428323385	CG16959	Probe	39648	CG16959	CG16959 gene product from transcript CG16959-RB	0.509689	9.64083	5.59599	1.01192e-05	0.000743709	3.30618
50	87	0	CUST_26780_PI428323385	CG42562	Probe	37008	CG42562	CG42562 gene product from transcript CG42562-RA	0.515071	6.47091	5.59385	1.01728e-05	0.000745197	3.30095
64	140	0	CUST_31495_PI428323385	CG5235	Probe	39758	CG5235	CG5235 gene product from transcript CG5235-RA	-0.458957	9.73179	-5.59377	1.01748e-05	0.000745197	3.30076
32	82	0	CUST_40488_PI428323385	CG9252	Probe	35380	del	deadlock	-0.853022	9.34951	-5.59264	1.02031e-05	0.000745972	3.29801
180	110	0	CUST_25155_PI428323385	CG40452	Probe	3355084	Snap25	Synapse protein 25	-1.07145	5.55362	-5.589	1.02949e-05	0.000751385	3.28913
303	71	0	CUST_17484_PI428323385	CG31062	Probe	43300	side	sidestep	-1.2123	5.00469	-5.5879	1.03228e-05	0.000751501	3.28645
106	59	0	CUST_10260_PI428323385	CG15347	Probe	31779	CG15347	CG15347 gene product from transcript CG15347-RA	-1.49929	5.67914	-5.58754	1.03321e-05	0.000751501	3.28556
83	30	0	CUST_29628_PI428323385	CG43946	Probe	NA	NA	NA	0.543869	9.19019	5.5867	1.03533e-05	0.000751747	3.28352
335	158	0	CUST_34472_PI428323385	CG6622	Probe	48311	Pkc53E	Protein C kinase 53E	0.729734	5.46156	5.58217	1.04696e-05	0.000758884	3.27246
109	107	0	CUST_30277_PI428323385	CG4686	Probe	42361	CG4686	CG4686 gene product from transcript CG4686-RA	-0.445042	12.0133	-5.57308	1.07066e-05	0.000774732	3.25028
320	48	0	CUST_39663_PI428323385	CG8882	Probe	33710	Trip1	CG8882 gene product from transcript CG8882-RA	-0.361052	15.3449	-5.57184	1.07393e-05	0.000775765	3.24727
118	117	0	CUST_33286_PI428323385	CG6094	Probe	34446	CG6094	CG6094 gene product from transcript CG6094-RA	0.582834	11.2713	5.5693	1.08067e-05	0.000778215	3.24107
74	149	0	CUST_18796_PI428323385	CG31794	Probe	35215	Pax	Paxillin	0.457307	10.183	5.56917	1.08101e-05	0.000778215	3.24076
158	37	0	CUST_11546_PI428323385	CG16857	Probe	33635	CG16857	CG16857 gene product from transcript CG16857-RA	-1.16747	7.05567	-5.56293	1.09776e-05	0.000788929	3.22552
84	57	0	CUST_32364_PI428323385	CG5664	Probe	40371	CG5664	CG5664 gene product from transcript CG5664-RA	-0.545756	9.2762	-5.55332	1.12407e-05	0.000806464	3.20206
210	159	0	CUST_36218_PI428323385	CG7367	Probe	34094	CG7367	CG7367 gene product from transcript CG7367-RB	0.960287	9.88957	5.55065	1.13149e-05	0.000810352	3.19554
220	132	0	CUST_31922_PI428323385	CG5455	Probe	43196	CG5455	CG5455 gene product from transcript CG5455-RA	-0.989905	6.69185	-5.54999	1.13333e-05	0.000810352	3.19393
12	39	0	CUST_39048_PI428323385	CG8596	Probe	38813	CG8596	CG8596 gene product from transcript CG8596-RA	0.502058	10.8682	5.54667	1.14265e-05	0.000815632	3.18582
6	57	0	CUST_16367_PI428323385	CG30016	Probe	246393	CG30016	CG30016 gene product from transcript CG30016-RA	0.773059	7.79471	5.54411	1.14988e-05	0.000819407	3.17957
176	37	0	CUST_18798_PI428323385	CG31794	Probe	35215	Pax	Paxillin	0.458355	9.61368	5.53879	1.16504e-05	0.00082881	3.1666
253	137	0	CUST_9062_PI428323385	CG14704	Probe	41379	PGRP-LB	Peptidoglycan recognition protein LB	-0.6961	5.05138	-5.53547	1.17462e-05	0.000834217	3.15849
374	31	0	CUST_18340_PI428323385	CG3158	Probe	41919	spn-E	spindle E	-0.798189	8.36404	-5.528	1.19646e-05	0.000848303	3.14024
22	93	0	CUST_32892_PI428323385	CG5896	Probe	43273	grass	Gram-positive Specific Serine protease	0.681626	8.92594	5.52394	1.20851e-05	0.000855405	3.13032
291	111	0	CUST_14587_PI428323385	CG1868	Probe	35985	CG1868	CG1868 gene product from transcript CG1868-RB	-0.376484	10.8289	-5.51779	1.227e-05	0.000867038	3.11528
90	89	0	CUST_770_PI428323385	CG10337	Probe	35247	CG10337	CG10337 gene product from transcript CG10337-RA	-0.740885	7.66742	-5.5099	1.25111e-05	0.000882598	3.09601
194	32	0	CUST_35761_PI428323385	CG7152	Probe	40424	Syn1	Syntrophin-like 1	-0.763662	4.91219	-5.50745	1.2587e-05	0.000886467	3.09002
65	2	0	CUST_16795_PI428323385	CG30287	Probe	246530	CG30287	CG30287 gene product from transcript CG30287-RA	-0.673046	6.41479	-5.50491	1.26663e-05	0.000890566	3.0838
65	124	0	CUST_13704_PI428323385	CG18069	Probe	43828	CaMKII	Calcium/calmodulin-dependent protein kinase II	-0.685057	11.0895	-5.49917	1.28471e-05	0.000901774	3.06977
67	9	0	CUST_14119_PI428323385	CG18343	Probe	36297	CG18343	CG18343 gene product from transcript CG18343-RA	0.515629	12.9538	5.49779	1.28908e-05	0.00090334	3.0664
177	57	0	CUST_12585_PI428323385	CG1745	Probe	32090	HP5	Heterochromatin protein 5	0.727683	10.2858	5.49232	1.30664e-05	0.000914125	3.05301
65	147	0	CUST_15704_PI428323385	CG2488	Probe	35322	phr6-4	(6-4)-photolyase	0.648781	7.26811	5.48372	1.33467e-05	0.000932193	3.03199
370	97	0	CUST_27399_PI428323385	CG42719	Probe	10178854	CG42719	CG42719 gene product from transcript CG42719-RA	-0.510576	5.63819	-5.47996	1.34713e-05	0.000939341	3.02278
105	115	0	CUST_206_PI428323385	CG10091	Probe	41502	GstD9	Glutathione S transferase D9	0.678917	10.8458	5.47207	1.37367e-05	0.000956262	3.00347
102	99	0	CUST_37356_PI428323385	CG7916	Probe	34800	CG7916	CG7916 gene product from transcript CG7916-RA	1.1675	5.38349	5.46247	1.40664e-05	0.000977606	2.97998
190	51	0	CUST_33180_PI428323385	CG6042	Probe	42294	Cyp12a4	CG6042 gene product from transcript CG6042-RA	-1.16779	5.37582	-5.459	1.41876e-05	0.000984402	2.97149
100	61	0	CUST_31311_PI428323385	CG5149	Probe	34013	CG5149	CG5149 gene product from transcript CG5149-RA	-0.823402	9.8092	-5.45656	1.42735e-05	0.000988736	2.96552
300	117	0	CUST_8103_PI428323385	CG14196	Probe	32915	CG14196	CG14196 gene product from transcript CG14196-RA	-1.29908	4.6907	-5.45248	1.44182e-05	0.000996	2.95552
318	44	0	CUST_10204_PI428323385	CG15304	Probe	50417	Neb-cGP	CG15304 gene product from transcript CG15304-RA	0.52878	13.5138	5.45227	1.44255e-05	0.000996	2.95502
85	140	0	CUST_33816_PI428323385	CG6311	Probe	39957	Edc3	Enhancer of decapping 3	-0.817978	10.3153	-5.44687	1.46195e-05	0.00100774	2.9418
77	93	0	CUST_27899_PI428323385	CG43051	Probe	12798168	CG43051	CG43051 gene product from transcript CG43051-RB	-0.698717	11.186	-5.44464	1.47004e-05	0.00101166	2.93634
261	45	0	CUST_28019_PI428323385	CG43079	Probe	40515	nrm	neuromusculin	0.791005	5.52784	5.44349	1.47423e-05	0.00101289	2.93352
147	136	0	CUST_23572_PI428323385	CG34405	Probe	37981	NaCP60E	Na channel protein 60E	-0.463114	7.174	-5.43945	1.48905e-05	0.00101786	2.92362
231	46	0	CUST_39512_PI428323385	CG8808	Probe	35970	Pdk	Pyruvate dehydrogenase kinase	0.501775	11.2424	5.43928	1.48967e-05	0.00101786	2.92321
31	58	0	CUST_4697_PI428323385	CG12199	Probe	32930	kek5	kekkon5	-0.469695	9.82253	-5.4389	1.49107e-05	0.00101786	2.92228
123	85	0	CUST_793_PI428323385	CG10344	Probe	37565	CG10344	CG10344 gene product from transcript CG10344-RA	1.19737	7.01489	5.43889	1.49111e-05	0.00101786	2.92225
39	52	0	CUST_987_PI428323385	CG10445	Probe	40938	CG10445	CG10445 gene product from transcript CG10445-RD	-0.544969	7.62067	-5.4231	1.55052e-05	0.00105671	2.88357
204	12	0	CUST_40393_PI428323385	CG9214	Probe	32574	Tob	CG9214 gene product from transcript CG9214-RA	-1.55999	5.78401	-5.41901	1.5663e-05	0.00106519	2.87355
297	44	0	CUST_20349_PI428323385	CG32549	Probe	32822	CG32549	CG32549 gene product from transcript CG32549-RD	-0.879	5.46096	-5.41857	1.56801e-05	0.00106519	2.87247
210	122	0	CUST_40490_PI428323385	CG9252	Probe	35380	del	deadlock	-0.799179	9.15422	-5.41667	1.57537e-05	0.00106847	2.86784
19	51	0	CUST_33743_PI428323385	CG6272	Probe	39243	CG6272	CG6272 gene product from transcript CG6272-RA	-0.554906	9.318	-5.41131	1.59644e-05	0.00108102	2.85468
46	39	0	CUST_9728_PI428323385	CG15046	Probe	32833	CG15046	CG15046 gene product from transcript CG15046-RA	0.605247	6.59295	5.40792	1.60991e-05	0.00108839	2.84637
328	8	0	CUST_28023_PI428323385	CG43079	Probe	40515	nrm	neuromusculin	0.942055	5.56602	5.39723	1.65308e-05	0.00111576	2.82018
370	134	0	CUST_7961_PI428323385	CG14121	Probe	39432	ver	verrocchio	-0.660836	10.5202	-5.39617	1.65741e-05	0.00111576	2.81759
290	61	0	CUST_14940_PI428323385	CG1966	Probe	43751	Acf1	ATP-dependent chromatin assembly factor large subunit	0.755119	11.2226	5.39595	1.65833e-05	0.00111576	2.81704
61	127	0	CUST_11484_PI428323385	CG16800	Probe	34693	CG16800	CG16800 gene product from transcript CG16800-RB	-0.667819	6.22184	-5.39283	1.67121e-05	0.00112264	2.80938
188	131	0	CUST_3118_PI428323385	CG11372	Probe	33162	galectin	CG11372 gene product from transcript CG11372-RD	-0.4551	11.3427	-5.38402	1.7081e-05	0.00114472	2.78777
253	121	0	CUST_36513_PI428323385	CG7506	Probe	38857	CG7506	CG7506 gene product from transcript CG7506-RA	0.584524	10.7217	5.38368	1.70951e-05	0.00114472	2.78696
20	83	0	CUST_7378_PI428323385	CG13800	Probe	38305	CG13800	CG13800 gene product from transcript CG13800-RB	0.524061	7.67283	5.37689	1.73855e-05	0.00116232	2.77029
267	53	0	CUST_27330_PI428323385	CG42699	Probe	31507	CG42699	CG42699 gene product from transcript CG42699-RC	0.53747	6.66213	5.37556	1.74426e-05	0.0011643	2.76704
52	27	0	CUST_13701_PI428323385	CG18069	Probe	43828	CaMKII	Calcium/calmodulin-dependent protein kinase II	-0.663227	10.7866	-5.37389	1.75149e-05	0.00116728	2.76295
344	45	0	CUST_35804_PI428323385	CG7173	Probe	40392	CG7173	CG7173 gene product from transcript CG7173-RA	-0.631004	9.80761	-5.36341	1.79761e-05	0.00119612	2.73723
118	149	0	CUST_36332_PI428323385	CG7421	Probe	40433	Nopp140	CG7421 gene product from transcript CG7421-RB	0.567937	8.31292	5.35859	1.81925e-05	0.00120857	2.72539
279	68	0	CUST_13573_PI428323385	CG17977	Probe	50251	CG17977	CG17977 gene product from transcript CG17977-RA	-0.514692	8.77566	-5.35736	1.82478e-05	0.00120857	2.72239
253	62	0	CUST_30645_PI428323385	CG4849	Probe	43358	CG4849	CG4849 gene product from transcript CG4849-RA	0.470508	12.1925	5.35733	1.82492e-05	0.00120857	2.72231
25	11	0	CUST_9052_PI428323385	CG14694	Probe	41307	CG14694	CG14694 gene product from transcript CG14694-RA	0.545066	5.07544	5.34571	1.8783e-05	0.00124198	2.69378
210	150	0	CUST_15061_PI428323385	CG2017	Probe	40733	CG2017	CG2017 gene product from transcript CG2017-RA	-0.530916	9.47578	-5.34395	1.88649e-05	0.00124544	2.68948
240	30	0	CUST_33157_PI428323385	CG6026	Probe	42287	CG6026	CG6026 gene product from transcript CG6026-RB	-0.848704	5.39115	-5.33593	1.9244e-05	0.00126848	2.66979
191	101	0	CUST_18937_PI428323385	CG31875	Probe	318996	CG31875	CG31875 gene product from transcript CG31875-RD	-0.948923	7.77155	-5.32875	1.95905e-05	0.0012893	2.65214
146	2	0	CUST_15204_PI428323385	CG2086	Probe	38218	drpr	draper	-0.532216	5.53378	-5.32467	1.97895e-05	0.00130038	2.64214
165	130	0	CUST_14291_PI428323385	CG18446	Probe	36023	CG18446	CG18446 gene product from transcript CG18446-RA	0.513052	4.85137	5.32261	1.98911e-05	0.00130501	2.63707
125	22	0	CUST_34262_PI428323385	CG6530	Probe	36961	mthl3	methuselah-like 3	-0.686656	10.5762	-5.31993	2.00238e-05	0.00131154	2.63049
250	45	0	CUST_364_PI428323385	CG10158	Probe	33971	CG10158	CG10158 gene product from transcript CG10158-RA	0.461197	8.75756	5.31904	2.0068e-05	0.00131154	2.62831
47	106	0	CUST_13279_PI428323385	CG17806	Probe	42142	CG17806	CG17806 gene product from transcript CG17806-RA	-0.484283	9.04297	-5.31873	2.00838e-05	0.00131154	2.62753
250	46	0	CUST_16559_PI428323385	CG30101	Probe	36950	CG30101	CG30101 gene product from transcript CG30101-RA	-0.827185	5.36883	-5.31751	2.01446e-05	0.00131348	2.62454
167	125	0	CUST_37755_PI428323385	CG8083	Probe	35914	CG8083	CG8083 gene product from transcript CG8083-RA	0.642285	5.51744	5.31533	2.0254e-05	0.00131857	2.61918
111	155	0	CUST_13703_PI428323385	CG18069	Probe	43828	CaMKII	Calcium/calmodulin-dependent protein kinase II	-0.658791	10.8127	-5.31295	2.03741e-05	0.00132435	2.61334
19	44	0	CUST_39029_PI428323385	CG8588	Probe	38818	pst	pastrel	-0.856842	10.8096	-5.31017	2.05152e-05	0.00133147	2.60651
72	75	0	CUST_8575_PI428323385	CG14434	Probe	31632	CG14434	CG14434 gene product from transcript CG14434-RA	0.473205	13.6981	5.30907	2.0571e-05	0.00133304	2.60382
241	18	0	CUST_13707_PI428323385	CG18069	Probe	43828	CaMKII	Calcium/calmodulin-dependent protein kinase II	-0.636717	10.8209	-5.29387	2.13627e-05	0.00138222	2.56647
164	156	0	CUST_3121_PI428323385	CG11372	Probe	33162	galectin	CG11372 gene product from transcript CG11372-RD	-0.475077	11.5103	-5.28946	2.15984e-05	0.00139529	2.55562
171	146	0	CUST_7962_PI428323385	CG14121	Probe	39432	ver	verrocchio	-0.663144	10.575	-5.28885	2.16308e-05	0.00139529	2.55413
47	61	0	CUST_12382_PI428323385	CG17299	Probe	42515	SNF4Agamma	SNF4/AMP-activated protein kinase gamma subunit	-0.555398	8.78166	-5.28739	2.17095e-05	0.00139823	2.55054
32	39	0	CUST_39027_PI428323385	CG8588	Probe	38818	pst	pastrel	-0.835652	10.8618	-5.28548	2.18131e-05	0.00140275	2.54583
274	164	0	CUST_14588_PI428323385	CG1868	Probe	35985	CG1868	CG1868 gene product from transcript CG1868-RB	-0.490336	10.6035	-5.28281	2.1958e-05	0.00140993	2.53928
75	157	0	CUST_11749_PI428323385	CG16986	Probe	38325	CG16986	CG16986 gene product from transcript CG16986-RA	0.585494	8.97329	5.27883	2.21764e-05	0.00142178	2.52949
364	152	0	CUST_29994_PI428323385	CG4562	Probe	42362	CG4562	CG4562 gene product from transcript CG4562-RB	-0.874209	6.30509	-5.27708	2.22728e-05	0.0014258	2.5252
178	132	0	CUST_5826_PI428323385	CG12908	Probe	36089	Ndg	Nidogen/entactin	-1.07629	5.23163	-5.27551	2.23604e-05	0.00142923	2.52132
284	6	0	CUST_3930_PI428323385	CG11833	Probe	43424	Ssl2	Strictosidine synthase-like 2	-0.810149	5.36641	-5.27268	2.2518e-05	0.00143714	2.51437
62	154	0	CUST_33285_PI428323385	CG6094	Probe	34446	CG6094	CG6094 gene product from transcript CG6094-RA	0.575381	11.2884	5.26612	2.28882e-05	0.00145855	2.49825
23	45	0	CUST_36022_PI428323385	CG7266	Probe	39675	Eip71CD	Ecdysone-induced protein 28/29kD	-0.547823	10.3659	-5.26464	2.29724e-05	0.00146171	2.49462
339	32	0	CUST_6729_PI428323385	CG1342	Probe	43642	Spn100A	Serpin 100A	1.46295	9.49309	5.25816	2.33461e-05	0.00148325	2.47866
342	16	0	CUST_34440_PI428323385	CG6610	Probe	38693	CG6610	CG6610 gene product from transcript CG6610-RA	0.759709	12.0205	5.25272	2.36641e-05	0.00150119	2.46528
19	156	0	CUST_675_PI428323385	CG10287	Probe	40745	Gasp	CG10287 gene product from transcript CG10287-RB	0.691175	10.8108	5.25152	2.37346e-05	0.00150178	2.46234
131	111	0	CUST_33296_PI428323385	CG6098	Probe	34449	Lrr47	Leucine-rich repeat 47	0.39413	10.2445	5.25135	2.37445e-05	0.00150178	2.46193
136	26	0	CUST_30116_PI428323385	CG4610	Probe	37571	CG4610	CG4610 gene product from transcript CG4610-RA	-0.707955	8.06254	-5.2501	2.38184e-05	0.00150419	2.45886
282	36	0	CUST_29993_PI428323385	CG4562	Probe	42362	CG4562	CG4562 gene product from transcript CG4562-RB	-0.78983	6.41056	-5.24507	2.41183e-05	0.00152086	2.44648
318	146	0	CUST_15448_PI428323385	CG2210	Probe	43739	awd	abnormal wing discs	0.829	11.2253	5.24345	2.4216e-05	0.00152474	2.44248
57	95	0	CUST_3115_PI428323385	CG11372	Probe	33162	galectin	CG11372 gene product from transcript CG11372-RD	-0.492555	11.7073	-5.23892	2.44906e-05	0.00153973	2.43134
208	21	0	CUST_22164_PI428323385	CG33667	Probe	3772511	CG33667	CG33667 gene product from transcript CG33667-RB	-0.851829	7.19071	-5.23181	2.49275e-05	0.00156307	2.41386
303	52	0	CUST_639_PI428323385	CG10279	Probe	40739	Rm62	CG10279 gene product from transcript CG10279-RK	-0.468895	14.0815	-5.23168	2.49359e-05	0.00156307	2.41352
245	2	0	CUST_12742_PI428323385	CG17574	Probe	36415	CG17574	CG17574 gene product from transcript CG17574-RA	-0.720796	8.3698	-5.22825	2.51491e-05	0.0015741	2.4051
129	17	0	CUST_5852_PI428323385	CG12919	Probe	36054	egr	eiger	-0.699995	7.86607	-5.22682	2.52392e-05	0.00157739	2.40157
131	140	0	CUST_18610_PI428323385	CG31712	Probe	34320	CG31712	CG31712 gene product from transcript CG31712-RA	-0.73413	10.7334	-5.22498	2.53546e-05	0.00158226	2.39706
166	8	0	CUST_22686_PI428323385	CG34057	Probe	3885645	CG34057	CG34057 gene product from transcript CG34057-RA	-0.54639	6.01373	-5.22365	2.54387e-05	0.00158466	2.39378
195	148	0	CUST_33767_PI428323385	CG6289	Probe	40236	Spn77Bc	Serpin 77Bc	-0.678375	5.54591	-5.22297	2.54824e-05	0.00158466	2.39209
14	87	0	CUST_37839_PI428323385	CG8104	Probe	39169	nudE	CG8104 gene product from transcript CG8104-RB	-0.487237	9.28708	-5.2226	2.55057e-05	0.00158466	2.39118
282	160	0	CUST_37623_PI428323385	CG8027	Probe	35943	CG8027	CG8027 gene product from transcript CG8027-RA	-0.54907	6.55675	-5.22167	2.55645e-05	0.00158566	2.38891
177	8	0	CUST_3510_PI428323385	CG1157	Probe	40771	Osi15	Osiris 15	-0.793304	4.68726	-5.22027	2.56537e-05	0.00158566	2.38547
347	107	0	CUST_3164_PI428323385	CG1139	Probe	38264	CG1139	CG1139 gene product from transcript CG1139-RA	-0.9887	6.96364	-5.22026	2.56548e-05	0.00158566	2.38542
32	116	0	CUST_30646_PI428323385	CG4849	Probe	43358	CG4849	CG4849 gene product from transcript CG4849-RA	0.354559	12.0442	5.21998	2.56722e-05	0.00158566	2.38475
269	122	0	CUST_25380_PI428323385	CG41265	Probe	5740691	l(2)41Ab	lethal (2) 41Ab	-0.764632	6.50723	-5.21827	2.57822e-05	0.00159013	2.38052
218	136	0	CUST_638_PI428323385	CG10279	Probe	40739	Rm62	CG10279 gene product from transcript CG10279-RK	-0.478633	14.0572	-5.21699	2.58643e-05	0.00159286	2.37738
268	157	0	CUST_20825_PI428323385	CG3280	Probe	39117	CG3280	CG3280 gene product from transcript CG3280-RD	-0.969458	7.42049	-5.21243	2.61599e-05	0.00160872	2.36615
327	74	0	CUST_12870_PI428323385	CG17657	Probe	33349	frtz	fritz	0.417201	9.78571	5.21166	2.62101e-05	0.00160946	2.36425
24	21	0	CUST_11075_PI428323385	CG15892	Probe	3772603	CG15892	CG15892 gene product from transcript CG15892-RB	-0.980609	5.10991	-5.20841	2.64227e-05	0.0016149	2.35626
59	135	0	CUST_37135_PI428323385	CG7809	Probe	40177	Grasp65	CG7809 gene product from transcript CG7809-RA	0.427285	10.8412	5.2084	2.64235e-05	0.0016149	2.35623
320	133	0	CUST_15967_PI428323385	CG2759	Probe	31271	w	white	-0.737274	9.427	-5.20784	2.64605e-05	0.0016149	2.35485
175	152	0	CUST_10071_PI428323385	CG15209	Probe	32011	CG15209	CG15209 gene product from transcript CG15209-RA	-1.0832	6.7905	-5.2075	2.64825e-05	0.0016149	2.35403
168	10	0	CUST_5320_PI428323385	CG12559	Probe	3354888	rl	rolled	-0.569435	10.4157	-5.20739	2.64901e-05	0.0016149	2.35375
341	130	0	CUST_11894_PI428323385	CG17064	Probe	36498	mars	CG17064 gene product from transcript CG17064-RB	-0.64845	10.3958	-5.20358	2.67423e-05	0.00162789	2.34438
333	47	0	CUST_25154_PI428323385	CG40452	Probe	3355084	Snap25	Synapse protein 25	-0.917153	5.03721	-5.20261	2.68072e-05	0.00162789	2.34198
304	138	0	CUST_30290_PI428323385	CG4694	Probe	34992	her	hermaphrodite	-0.5294	11.134	-5.20244	2.68189e-05	0.00162789	2.34155
9	56	0	CUST_17178_PI428323385	CG30495	Probe	246651	CG30495	CG30495 gene product from transcript CG30495-RA	-0.5671	6.32296	-5.19996	2.69849e-05	0.00163561	2.33545
156	4	0	CUST_14870_PI428323385	CG1925	Probe	47186	mus205	mutagen-sensitive 205	-0.614616	9.13982	-5.19866	2.70724e-05	0.00163856	2.33225
76	21	0	CUST_3119_PI428323385	CG11372	Probe	33162	galectin	CG11372 gene product from transcript CG11372-RD	-0.501944	11.4847	-5.1978	2.713e-05	0.0016397	2.33015
132	122	0	CUST_21057_PI428323385	CG33062	Probe	318840	CG33062	CG33062 gene product from transcript CG33062-RB	-0.474418	8.69423	-5.19208	2.75199e-05	0.00166088	2.31605
67	38	0	CUST_20350_PI428323385	CG32549	Probe	32822	CG32549	CG32549 gene product from transcript CG32549-RD	-0.561681	5.44493	-5.18523	2.79937e-05	0.00168706	2.29918
48	139	0	CUST_8748_PI428323385	CG14534	Probe	34075	TwdlE	TweedleE	-0.593782	8.68485	-5.18454	2.80416e-05	0.00168754	2.29748
77	55	0	CUST_33158_PI428323385	CG6026	Probe	42287	CG6026	CG6026 gene product from transcript CG6026-RB	-0.932587	5.46681	-5.18376	2.80961e-05	0.00168841	2.29557
138	45	0	CUST_28989_PI428323385	CG43647	Probe	NA	NA	NA	-0.581363	4.98083	-5.18205	2.82159e-05	0.00169319	2.29136
307	13	0	CUST_40515_PI428323385	CG9259	Probe	35372	CG9259	CG9259 gene product from transcript CG9259-RA	-0.657178	5.4581	-5.17882	2.84445e-05	0.00170449	2.28339
90	21	0	CUST_6105_PI428323385	CG13062	Probe	39799	CG13062	CG13062 gene product from transcript CG13062-RB	-0.719788	5.5342	-5.17152	2.89667e-05	0.00173332	2.26541
124	34	0	CUST_33342_PI428323385	CG6117	Probe	39733	Pka-C3	cAMP-dependent protein kinase 3	-0.466205	8.47307	-5.17027	2.90566e-05	0.00173624	2.26234
242	15	0	CUST_13697_PI428323385	CG18069	Probe	43828	CaMKII	Calcium/calmodulin-dependent protein kinase II	-0.676815	10.7818	-5.16782	2.92348e-05	0.00174441	2.2563
118	18	0	CUST_31334_PI428323385	CG5164	Probe	37106	GstE1	Glutathione S transferase E1	0.713307	10.3581	5.16582	2.93808e-05	0.00175065	2.25138
127	158	0	CUST_14689_PI428323385	CG18801	Probe	34930	Ku80	CG18801 gene product from transcript CG18801-RA	-0.455533	9.36881	-5.16129	2.97148e-05	0.00176805	2.24021
249	14	0	CUST_8329_PI428323385	CG14304	Probe	42232	CG14304	CG14304 gene product from transcript CG14304-RA	-1.08741	8.43643	-5.15993	2.98157e-05	0.00177156	2.23686
27	63	0	CUST_15703_PI428323385	CG2488	Probe	35322	phr6-4	(6-4)-photolyase	0.683271	7.13277	5.15554	3.01438e-05	0.00178853	2.22604
123	112	0	CUST_25995_PI428323385	CG42311	Probe	37038	grh	grainy head	0.736498	13.0307	5.1533	3.03124e-05	0.00179601	2.22053
344	87	0	CUST_32890_PI428323385	CG5896	Probe	43273	grass	Gram-positive Specific Serine protease	0.654223	8.85983	5.15027	3.0542e-05	0.00180708	2.21307
127	123	0	CUST_18802_PI428323385	CG31794	Probe	35215	Pax	Paxillin	0.476498	10.2242	5.14364	3.10519e-05	0.0018342	2.19671
184	3	0	CUST_14418_PI428323385	CG18542	Probe	41176	CG18542	CG18542 gene product from transcript CG18542-RA	-0.591794	10.4143	-5.14291	3.11084e-05	0.0018342	2.19492
318	11	0	CUST_5313_PI428323385	CG12559	Probe	3354888	rl	rolled	-0.627304	9.17373	-5.14262	3.11309e-05	0.0018342	2.1942
98	106	0	CUST_539_PI428323385	CG10238	Probe	43017	Mocs2	Molybdopterin synthase 2	0.424867	9.14415	5.14187	3.11891e-05	0.00183507	2.19236
161	3	0	CUST_4798_PI428323385	CG12241	Probe	41834	CG12241	CG12241 gene product from transcript CG12241-RA	0.563094	6.77545	5.13995	3.13385e-05	0.00184129	2.18764
279	73	0	CUST_31606_PI428323385	CG5289	Probe	42828	Pros26.4	Proteasome 26S subunit subunit 4 ATPase	0.310604	14.6006	5.13927	3.1392e-05	0.00184187	2.18595
264	60	0	CUST_34470_PI428323385	CG6622	Probe	48311	Pkc53E	Protein C kinase 53E	0.807476	5.5715	5.1348	3.1744e-05	0.00185993	2.17493
157	135	0	CUST_18595_PI428323385	CG31705	Probe	34577	CG31705	CG31705 gene product from transcript CG31705-RA	0.552528	10.6735	5.13258	3.19205e-05	0.00186768	2.16946
18	132	0	CUST_14585_PI428323385	CG1868	Probe	35985	CG1868	CG1868 gene product from transcript CG1868-RB	-0.404127	10.8604	-5.13147	3.20087e-05	0.00187025	2.16673
226	164	0	CUST_205_PI428323385	CG10091	Probe	41502	GstD9	Glutathione S transferase D9	0.677268	11.6004	5.12927	3.21853e-05	0.00187797	2.16129
341	21	0	CUST_12201_PI428323385	CG17227	Probe	41518	lig3	DNA ligase III	-0.499407	9.03118	-5.12834	3.22593e-05	0.00187968	2.15902
26	95	0	CUST_2833_PI428323385	CG11249	Probe	40409	CG11249	CG11249 gene product from transcript CG11249-RA	-0.679615	5.8353	-5.12561	3.24801e-05	0.00188994	2.15228
58	153	0	CUST_12873_PI428323385	CG17658	Probe	37793	CG17658	CG17658 gene product from transcript CG17658-RA	-0.737674	6.54697	-5.12503	3.2527e-05	0.00189006	2.15086
169	161	0	CUST_26004_PI428323385	CG42311	Probe	37038	grh	grainy head	0.724939	12.8513	5.11893	3.30259e-05	0.00191503	2.13582
311	7	0	CUST_25252_PI428323385	CG4079	Probe	34293	Taf11	TBP-associated factor 11	-0.556332	12.0561	-5.11828	3.308e-05	0.00191503	2.1342
64	132	0	CUST_1280_PI428323385	CG10583	Probe	38640	Sse	Separase	-0.419185	9.54759	-5.11812	3.30928e-05	0.00191503	2.13382
184	35	0	CUST_7512_PI428323385	CG13895	Probe	38087	CG13895	CG13895 gene product from transcript CG13895-RA	-0.594303	11.0244	-5.1136	3.34684e-05	0.0019341	2.12267
194	25	0	CUST_23569_PI428323385	CG34405	Probe	37981	NaCP60E	Na channel protein 60E	-0.465844	7.08744	-5.10947	3.38151e-05	0.00195147	2.11249
207	29	0	CUST_29745_PI428323385	CG4423	Probe	48339	GstD6	Glutathione S transferase D6	-1.16739	4.51208	-5.10387	3.42913e-05	0.00197624	2.09868
156	115	0	CUST_14606_PI428323385	CG18731	Probe	59246	CG18731	CG18731 gene product from transcript CG18731-RA	0.390838	12.0303	5.10032	3.45962e-05	0.0019911	2.08993
5	64	0	CUST_18596_PI428323385	CG31705	Probe	34577	CG31705	CG31705 gene product from transcript CG31705-RA	0.524668	10.7647	5.09834	3.47678e-05	0.00199825	2.08505
11	148	0	CUST_30232_PI428323385	CG4670	Probe	36464	CG4670	CG4670 gene product from transcript CG4670-RA	0.469038	11.0906	5.0973	3.4858e-05	0.00200071	2.08249
322	118	0	CUST_774_PI428323385	CG10339	Probe	37854	CG10339	CG10339 gene product from transcript CG10339-RA	-0.600246	5.65755	-5.0959	3.49807e-05	0.00200502	2.07902
213	24	0	CUST_13365_PI428323385	CG17853	Probe	35743	Or43b	Odorant receptor 43b	-0.970303	6.59417	-5.09371	3.5172e-05	0.00201325	2.07363
308	1	0	CUST_34468_PI428323385	CG6622	Probe	48311	Pkc53E	Protein C kinase 53E	0.669041	5.63698	5.09196	3.53261e-05	0.00201933	2.06931
304	116	0	CUST_40327_PI428323385	CG9186	Probe	38150	CG9186	CG9186 gene product from transcript CG9186-RB	-0.450769	11.4314	-5.08924	3.55672e-05	0.00202986	2.06259
52	36	0	CUST_31_PI428323385	CG10021	Probe	33602	bowl	brother of odd with entrails limited	-0.680163	9.44269	-5.0888	3.56065e-05	0.00202986	2.0615
129	38	0	CUST_36215_PI428323385	CG7367	Probe	34094	CG7367	CG7367 gene product from transcript CG7367-RB	0.619175	5.56278	5.08762	3.57109e-05	0.00203307	2.05861
103	146	0	CUST_38864_PI428323385	CG8529	Probe	36362	Dyb	Dystrobrevin-like	-0.42175	9.50166	-5.0862	3.58378e-05	0.00203754	2.05511
279	107	0	CUST_28724_PI428323385	CG43369	Probe	3885647	Mitf	CG43369 gene product from transcript CG43369-RD	-0.523238	10.5296	-5.08544	3.59064e-05	0.00203869	2.05322
320	127	0	CUST_33640_PI428323385	CG6214	Probe	34686	MRP	Multidrug-Resistance like Protein 1	-0.443152	9.91482	-5.07916	3.64739e-05	0.00206813	2.03773
233	1	0	CUST_460_PI428323385	CG10200	Probe	36648	CG10200	CG10200 gene product from transcript CG10200-RB	0.639619	12.2788	5.07773	3.66048e-05	0.00207277	2.03419
195	128	0	CUST_36577_PI428323385	CG7532	Probe	34838	l(2)34Fc	lethal (2) 34Fc	0.939309	11.3591	5.07628	3.67375e-05	0.00207431	2.03062
155	4	0	CUST_33933_PI428323385	CG6367	Probe	32832	psh	persephone	-0.759517	4.76921	-5.07582	3.67791e-05	0.00207431	2.0295
357	68	0	CUST_11390_PI428323385	CG16757	Probe	46194	Spn	Spinophilin	0.458727	7.03432	5.07582	3.67795e-05	0.00207431	2.02949
38	44	0	CUST_29170_PI428323385	CG4373	Probe	37594	Cyp6d2	CG4373 gene product from transcript CG4373-RA	-1.59631	7.84805	-5.07516	3.68397e-05	0.00207493	2.02788
61	151	0	CUST_31916_PI428323385	CG5451	Probe	42272	CG5451	CG5451 gene product from transcript CG5451-RB	0.580619	10.7753	5.06802	3.75035e-05	0.0021095	2.01024
73	123	0	CUST_15908_PI428323385	CG2698	Probe	40945	CG2698	CG2698 gene product from transcript CG2698-RD	-0.430661	11.0605	-5.06318	3.79597e-05	0.00213231	1.9983
288	106	0	CUST_131_PI428323385	CG1007	Probe	38091	emc	extra macrochaetae	-0.445491	11.7028	-5.06159	3.81104e-05	0.00213793	1.99439
52	119	0	CUST_6197_PI428323385	CG1311	Probe	38523	CG1311	CG1311 gene product from transcript CG1311-RA	-0.339927	12.21	-5.05567	3.8679e-05	0.00216695	1.97977
26	31	0	CUST_35591_PI428323385	CG7097	Probe	37203	hppy	happyhour	-0.544989	8.01945	-5.05197	3.90379e-05	0.00218283	1.97065
38	149	0	CUST_15059_PI428323385	CG2017	Probe	40733	CG2017	CG2017 gene product from transcript CG2017-RA	-0.505573	9.51681	-5.05168	3.90659e-05	0.00218283	1.96994
293	52	0	CUST_15070_PI428323385	CG2023	Probe	40724	CG2023	CG2023 gene product from transcript CG2023-RA	-0.611821	6.53897	-5.04961	3.92693e-05	0.00219129	1.96481
351	116	0	CUST_25997_PI428323385	CG42311	Probe	37038	grh	grainy head	0.733607	13.0664	5.04754	3.94727e-05	0.0021979	1.95971
67	81	0	CUST_37883_PI428323385	CG8114	Probe	38879	pbl	pebble	-0.449581	9.81281	-5.04734	3.94919e-05	0.0021979	1.95923
153	117	0	CUST_31840_PI428323385	CG5413	Probe	42092	CREG	Cellular Repressor of E1A-stimulated Genes	0.803201	10.8214	5.04619	3.96064e-05	0.00220137	1.95637
248	119	0	CUST_13395_PI428323385	CG17883	Probe	3355139	CG17883	CG17883 gene product from transcript CG17883-RB	-0.48399	11.9159	-5.04478	3.97458e-05	0.0022035	1.9529
332	120	0	CUST_8421_PI428323385	CG1435	Probe	31669	CBP	sarcoplasmic calcium-binding protein	-0.490754	13.1156	-5.04474	3.97494e-05	0.0022035	1.95281
17	154	0	CUST_8234_PI428323385	CG14253	Probe	43243	CG14253	CG14253 gene product from transcript CG14253-RB	-0.604562	5.61026	-5.04244	3.99785e-05	0.00220909	1.94714
289	101	0	CUST_19178_PI428323385	CG32029	Probe	38990	Cpr66D	Cuticular protein 66D	-0.867644	8.33121	-5.04209	4.00142e-05	0.00220909	1.94626
114	40	0	CUST_4070_PI428323385	CG11905	Probe	39895	CG11905	CG11905 gene product from transcript CG11905-RB	0.746663	10.7544	5.042	4.0023e-05	0.00220909	1.94604
26	105	0	CUST_25116_PI428323385	CG40378	Probe	3355048	CG40378	CG40378 gene product from transcript CG40378-RB	-0.573953	4.59865	-5.04163	4.00596e-05	0.00220909	1.94514
296	79	0	CUST_7328_PI428323385	CG13775	Probe	33975	CG13775	CG13775 gene product from transcript CG13775-RA	-0.475776	7.60635	-5.0375	4.0476e-05	0.00222914	1.93493
119	152	0	CUST_34278_PI428323385	CG6539	Probe	39195	Gem3	Gemin3	0.640053	9.63671	5.03559	4.06696e-05	0.00223608	1.93022
197	46	0	CUST_17648_PI428323385	CG31137	Probe	42880	twin	CG31137 gene product from transcript CG31137-RB	0.807853	7.55294	5.03521	4.0708e-05	0.00223608	1.92928
47	110	0	CUST_7143_PI428323385	CG13663	Probe	43029	CG13663	CG13663 gene product from transcript CG13663-RA	-0.483668	10.0392	-5.03009	4.12324e-05	0.00226194	1.91665
135	120	0	CUST_12070_PI428323385	CG1716	Probe	32301	Set2	CG1716 gene product from transcript CG1716-RA	-0.442213	10.2394	-5.02638	4.16164e-05	0.00228004	1.9075
322	72	0	CUST_36940_PI428323385	CG7720	Probe	42257	CG7720	CG7720 gene product from transcript CG7720-RB	0.806106	8.50273	5.02496	4.17651e-05	0.00228522	1.90398
174	36	0	CUST_39968_PI428323385	CG9027	Probe	36232	CG9027	CG9027 gene product from transcript CG9027-RD	0.391262	13.4199	5.02389	4.18773e-05	0.00228615	1.90133
274	27	0	CUST_11735_PI428323385	CG16979	Probe	39687	CG16979	CG16979 gene product from transcript CG16979-RA	0.47935	10.6036	5.02338	4.19302e-05	0.00228615	1.90008
46	99	0	CUST_35107_PI428323385	CG6898	Probe	41975	Zip3	Zinc/iron regulated transporter-related protein 3	0.474696	8.04714	5.02324	4.19448e-05	0.00228615	1.89974
226	146	0	CUST_38147_PI428323385	CG8222	Probe	34127	Pvr	PDGF- and VEGF-receptor related	-0.43512	8.51955	-5.02204	4.20708e-05	0.00229006	1.89678
45	20	0	CUST_41246_PI428323385	CG9611	Probe	41677	f-cup	flyers-cup	-0.458254	5.00576	-5.01579	4.27339e-05	0.00232316	1.88134
144	2	0	CUST_33610_PI428323385	CG6214	Probe	34686	MRP	Multidrug-Resistance like Protein 1	-0.436601	9.79935	-5.01341	4.29888e-05	0.00233401	1.87547
142	106	0	CUST_31679_PI428323385	CG5341	Probe	37142	sec6	CG5341 gene product from transcript CG5341-RA	0.400601	9.63348	5.00941	4.34214e-05	0.00235447	1.86559
213	153	0	CUST_33612_PI428323385	CG6214	Probe	34686	MRP	Multidrug-Resistance like Protein 1	-0.432203	9.90051	-5.00872	4.34959e-05	0.00235548	1.86389
151	105	0	CUST_9069_PI428323385	CG14709	Probe	41387	Mrp4	Multidrug resistance protein 4 ortholog	-0.615391	5.566	-5.00621	4.37704e-05	0.00236731	1.85768
10	20	0	CUST_22158_PI428323385	CG33664	Probe	3772644	CG33664	CG33664 gene product from transcript CG33664-RB	-0.767176	7.14922	-5.00485	4.39191e-05	0.0023723	1.85434
191	6	0	CUST_25992_PI428323385	CG42311	Probe	37038	grh	grainy head	0.724227	12.9174	5.0039	4.40241e-05	0.00237469	1.85198
74	4	0	CUST_38498_PI428323385	CG8367	Probe	36571	cg	combgap	0.488683	9.66791	5.00343	4.40758e-05	0.00237469	1.85082
214	53	0	CUST_17322_PI428323385	CG31006	Probe	43683	stops	slow termination of phototransduction	-0.666178	5.82315	-5.00087	4.43584e-05	0.00238687	1.84451
2	112	0	CUST_40567_PI428323385	CG9288	Probe	41689	CG9288	CG9288 gene product from transcript CG9288-RA	-0.481741	11.136	-5.00017	4.4437e-05	0.00238805	1.84277
76	40	0	CUST_20217_PI428323385	CG32491	Probe	49228	mod(mdg4)	modifier of mdg4	0.407161	10.5608	4.9932	4.52184e-05	0.00242695	1.82556
80	91	0	CUST_7170_PI428323385	CG13679	Probe	38919	CG13679	CG13679 gene product from transcript CG13679-RA	-1.08034	6.59297	-4.99211	4.5342e-05	0.00242994	1.82287
85	57	0	CUST_17646_PI428323385	CG31137	Probe	42880	twin	CG31137 gene product from transcript CG31137-RB	0.756415	7.50668	4.99169	4.53893e-05	0.00242994	1.82184
257	21	0	CUST_33016_PI428323385	CG5953	Probe	34985	CG5953	CG5953 gene product from transcript CG5953-RA	-0.473803	4.96239	-4.98996	4.55863e-05	0.00243739	1.81757
348	6	0	CUST_31841_PI428323385	CG5413	Probe	42092	CREG	Cellular Repressor of E1A-stimulated Genes	0.706058	10.4202	4.98849	4.57549e-05	0.00244331	1.81392
119	91	0	CUST_4661_PI428323385	CG12177	Probe	32326	CG12177	CG12177 gene product from transcript CG12177-RA	-0.578338	5.7868	-4.98768	4.58478e-05	0.00244518	1.81192
12	146	0	CUST_20625_PI428323385	CG32685	Probe	31942	CG32685	CG32685 gene product from transcript CG32685-RC	-0.46629	10.4105	-4.98418	4.62504e-05	0.00246353	1.80329
127	87	0	CUST_5097_PI428323385	CG12405	Probe	246663	Prx2540-1	Peroxiredoxin 2540-1	0.796144	9.84821	4.98247	4.64492e-05	0.00247053	1.79906
337	13	0	CUST_29938_PI428323385	CG4532	Probe	31620	pod1	CG4532 gene product from transcript CG4532-RA	0.845119	7.28503	4.98204	4.64988e-05	0.00247053	1.79801
181	98	0	CUST_19858_PI428323385	CG32364	Probe	317996	CG32364	CG32364 gene product from transcript CG32364-RA	2.16527	8.75246	4.98024	4.67085e-05	0.00247855	1.79357
119	43	0	CUST_17652_PI428323385	CG31137	Probe	42880	twin	CG31137 gene product from transcript CG31137-RB	0.676355	7.40006	4.97884	4.68726e-05	0.00248228	1.79011
277	122	0	CUST_33254_PI428323385	CG6071	Probe	39308	CG6071	CG6071 gene product from transcript CG6071-RA	-0.876195	6.9049	-4.97864	4.68965e-05	0.00248228	1.7896
22	124	0	CUST_24797_PI428323385	CG3944	Probe	44207	ND23	NADH:ubiquinone reductase 23kD subunit precursor	0.462304	10.0147	4.9755	4.72663e-05	0.00249872	1.78185
93	160	0	CUST_9733_PI428323385	CG1505	Probe	32159	gd	gastrulation-defective	-0.592998	4.61574	-4.97424	4.74156e-05	0.00250347	1.77874
308	39	0	CUST_41545_PI428323385	CG9739	Probe	40090	fz2	frizzled 2	0.41745	7.7678	4.97108	4.77923e-05	0.00251792	1.77093
123	131	0	CUST_32526_PI428323385	CG5727	Probe	34356	CG5727	CG5727 gene product from transcript CG5727-RA	0.511756	10.484	4.97094	4.78086e-05	0.00251792	1.7706
37	53	0	CUST_38325_PI428323385	CG8295	Probe	36750	Mlf	Myelodysplasia/myeloid leukemia factor	0.454552	7.98264	4.96921	4.80165e-05	0.00252572	1.76631
347	84	0	CUST_40389_PI428323385	CG9214	Probe	32574	Tob	CG9214 gene product from transcript CG9214-RA	-1.47718	5.86157	-4.96768	4.82009e-05	0.00253226	1.76253
101	120	0	CUST_20848_PI428323385	CG32809	Probe	31121	CG32809	CG32809 gene product from transcript CG32809-RG	-0.536726	6.99417	-4.96717	4.82627e-05	0.00253235	1.76127
178	134	0	CUST_36217_PI428323385	CG7367	Probe	34094	CG7367	CG7367 gene product from transcript CG7367-RB	0.733513	5.9761	4.96178	4.89175e-05	0.00256109	1.74797
31	132	0	CUST_40394_PI428323385	CG9214	Probe	32574	Tob	CG9214 gene product from transcript CG9214-RA	-1.29117	5.91934	-4.96167	4.89318e-05	0.00256109	1.74768
121	130	0	CUST_14618_PI428323385	CG18740	Probe	41942	mor	moira	0.391295	9.38537	4.95929	4.92235e-05	0.00257316	1.74182
85	34	0	CUST_13705_PI428323385	CG18069	Probe	43828	CaMKII	Calcium/calmodulin-dependent protein kinase II	-0.616891	10.8059	-4.95669	4.95454e-05	0.00258679	1.73539
11	14	0	CUST_11465_PI428323385	CG16789	Probe	41154	CG16789	CG16789 gene product from transcript CG16789-RA	-0.648867	5.98493	-4.95298	5.00078e-05	0.0026077	1.72622
184	160	0	CUST_40392_PI428323385	CG9214	Probe	32574	Tob	CG9214 gene product from transcript CG9214-RA	-1.41893	5.80276	-4.95098	5.02584e-05	0.00261753	1.72129
309	17	0	CUST_1425_PI428323385	CG10638	Probe	39424	CG10638	CG10638 gene product from transcript CG10638-RA	-0.654735	7.53586	-4.95009	5.03712e-05	0.00262017	1.71908
131	164	0	CUST_13698_PI428323385	CG18069	Probe	43828	CaMKII	Calcium/calmodulin-dependent protein kinase II	-0.68731	10.9811	-4.94776	5.06658e-05	0.00263225	1.71333
303	141	0	CUST_36020_PI428323385	CG7266	Probe	39675	Eip71CD	Ecdysone-induced protein 28/29kD	-0.61943	10.2992	-4.94582	5.09126e-05	0.00264044	1.70853
362	63	0	CUST_22706_PI428323385	CG34076	Probe	NA	NA	NA	0.741695	14.2205	4.94525	5.09855e-05	0.00264044	1.70712
188	128	0	CUST_20792_PI428323385	CG3278	Probe	35454	Tif-IA	CG3278 gene product from transcript CG3278-RA	-0.436382	11.9917	-4.94505	5.10112e-05	0.00264044	1.70662
94	131	0	CUST_15968_PI428323385	CG2759	Probe	31271	w	white	-0.766969	9.21919	-4.94366	5.11886e-05	0.00264638	1.7032
185	14	0	CUST_21559_PI428323385	CG3326	Probe	33544	CG3326	CG3326 gene product from transcript CG3326-RA	0.618145	8.94396	4.9428	5.12995e-05	0.002647	1.70106
290	142	0	CUST_26864_PI428323385	CG42588	Probe	39457	CG42588	CG42588 gene product from transcript CG42588-RA	-0.675653	8.14974	-4.94203	5.13985e-05	0.002647	1.69916
203	59	0	CUST_3674_PI428323385	CG11671	Probe	40976	CG11671	CG11671 gene product from transcript CG11671-RA	-0.766638	4.49943	-4.94196	5.14071e-05	0.002647	1.699
168	110	0	CUST_15193_PI428323385	CG2086	Probe	38218	drpr	draper	-0.521194	7.26253	-4.94162	5.14516e-05	0.002647	1.69814
309	105	0	CUST_22194_PI428323385	CG33694	Probe	3771934	cana	CENP-ana	-0.480782	8.47203	-4.94039	5.16094e-05	0.00265188	1.69512
187	24	0	CUST_25998_PI428323385	CG42311	Probe	37038	grh	grainy head	0.692829	12.9222	4.93789	5.1934e-05	0.00266532	1.68894
320	74	0	CUST_3804_PI428323385	CG11759	Probe	32071	Kap3	Kinesin associated protein 3	0.417912	7.39256	4.93452	5.23748e-05	0.00268467	1.6806
149	65	0	CUST_41645_PI428323385	CG9771	Probe	40579	Dip2	Dorsal interacting protein 2	0.731515	10.6674	4.93293	5.25835e-05	0.0026921	1.67668
191	161	0	CUST_16474_PI428323385	CG3008	Probe	33693	CG3008	CG3008 gene product from transcript CG3008-RA	-0.647917	10.2546	-4.93193	5.27152e-05	0.00269484	1.67421
308	57	0	CUST_26002_PI428323385	CG42311	Probe	37038	grh	grainy head	0.726113	13.0556	4.93155	5.27649e-05	0.00269484	1.67328
256	148	0	CUST_24478_PI428323385	CG3782	Probe	33715	mRpL28	mitochondrial ribosomal protein L28	0.550866	12.2175	4.93036	5.29228e-05	0.00269964	1.67034
20	75	0	CUST_37540_PI428323385	CG7987	Probe	41768	CG7987	CG7987 gene product from transcript CG7987-RA	-0.493773	8.28101	-4.92874	5.31378e-05	0.00270733	1.66634
11	136	0	CUST_5849_PI428323385	CG12919	Probe	36054	egr	eiger	-0.592822	8.30644	-4.92825	5.32038e-05	0.00270743	1.66511
11	80	0	CUST_29612_PI428323385	CG43946	Probe	NA	NA	NA	0.514264	9.31852	4.92646	5.34425e-05	0.0027163	1.6607
228	5	0	CUST_23110_PI428323385	CG34261	Probe	5740205	CG34261	CG34261 gene product from transcript CG34261-RB	0.37389	9.23691	4.92594	5.3512e-05	0.00271655	1.65941
178	55	0	CUST_643_PI428323385	CG10279	Probe	40739	Rm62	CG10279 gene product from transcript CG10279-RK	-0.448755	14.1348	-4.92171	5.40829e-05	0.00274224	1.64895
297	21	0	CUST_6446_PI428323385	CG13258	Probe	34959	CG13258	CG13258 gene product from transcript CG13258-RA	-0.783947	7.06782	-4.92086	5.41971e-05	0.00274473	1.64687
301	13	0	CUST_37025_PI428323385	CG7759	Probe	36234	CG7759	CG7759 gene product from transcript CG7759-RA	-0.542886	5.35033	-4.92033	5.42692e-05	0.00274508	1.64556
107	71	0	CUST_41342_PI428323385	CG9646	Probe	36918	CG9646	CG9646 gene product from transcript CG9646-RA	-0.334126	9.6379	-4.91622	5.48315e-05	0.00277021	1.63539
208	114	0	CUST_4733_PI428323385	CG12210	Probe	36080	Syb	Synaptobrevin	-0.506209	8.27873	-4.91311	5.52601e-05	0.00278738	1.62771
73	155	0	CUST_26866_PI428323385	CG42588	Probe	39457	CG42588	CG42588 gene product from transcript CG42588-RA	-0.726881	8.14398	-4.91267	5.53212e-05	0.00278738	1.62662
242	115	0	CUST_37838_PI428323385	CG8104	Probe	39169	nudE	CG8104 gene product from transcript CG8104-RB	-0.510745	9.24848	-4.91232	5.53697e-05	0.00278738	1.62576
27	147	0	CUST_22509_PI428323385	CG33978	Probe	3885646	CG33978	CG33978 gene product from transcript CG33978-RB	-0.924101	10.5196	-4.91035	5.56439e-05	0.00279785	1.62088
176	127	0	CUST_3124_PI428323385	CG11372	Probe	33162	galectin	CG11372 gene product from transcript CG11372-RD	-0.38171	11.3652	-4.90766	5.60208e-05	0.00281345	1.61423
199	3	0	CUST_41088_PI428323385	CG9523	Probe	33897	l(2)k11101	lethal (2) k11101	0.478259	9.97633	4.90601	5.62527e-05	0.00282031	1.61015
298	152	0	CUST_13709_PI428323385	CG18069	Probe	43828	CaMKII	Calcium/calmodulin-dependent protein kinase II	-0.630669	10.7645	-4.90573	5.62912e-05	0.00282031	1.60948
100	128	0	CUST_38496_PI428323385	CG8367	Probe	36571	cg	combgap	0.598612	9.76253	4.90505	5.63874e-05	0.00282178	1.60779
79	124	0	CUST_17223_PI428323385	CG3060	Probe	45906	mr	morula	-0.343283	12.1348	-4.90196	5.68267e-05	0.00284039	1.60014
261	33	0	CUST_11855_PI428323385	CG17046	Probe	38067	klar	klarsicht	0.542846	7.66206	4.89959	5.71641e-05	0.00285388	1.5943
101	11	0	CUST_32_PI428323385	CG10021	Probe	33602	bowl	brother of odd with entrails limited	-0.673416	9.42957	-4.89854	5.73156e-05	0.00285806	1.59169
87	30	0	CUST_18792_PI428323385	CG31794	Probe	35215	Pax	Paxillin	0.427441	10.2306	4.89538	5.7771e-05	0.00287736	1.58389
6	141	0	CUST_25341_PI428323385	CG4115	Probe	41499	CG4115	CG4115 gene product from transcript CG4115-RA	0.571969	8.82668	4.88997	5.856e-05	0.00291076	1.57052
291	126	0	CUST_20862_PI428323385	CG32809	Probe	31121	CG32809	CG32809 gene product from transcript CG32809-RG	-0.470035	7.00841	-4.88984	5.85795e-05	0.00291076	1.57019
170	45	0	CUST_24876_PI428323385	CG3980	Probe	33610	Cep97	CG3980 gene product from transcript CG3980-RC	-0.372169	9.70835	-4.88872	5.87442e-05	0.00291551	1.56742
242	111	0	CUST_9063_PI428323385	CG14704	Probe	41379	PGRP-LB	Peptidoglycan recognition protein LB	-0.622108	5.108	-4.8877	5.88941e-05	0.00291951	1.56491
339	45	0	CUST_13574_PI428323385	CG17977	Probe	50251	CG17977	CG17977 gene product from transcript CG17977-RA	-0.544835	8.99101	-4.8862	5.91161e-05	0.00292708	1.5612
369	81	0	CUST_1353_PI428323385	CG10618	Probe	43067	CHKov1	CG10618 gene product from transcript CG10618-RB	-0.628743	10.3226	-4.88332	5.95449e-05	0.00294486	1.55407
335	59	0	CUST_16428_PI428323385	CG30049	Probe	246416	CG30049	CG30049 gene product from transcript CG30049-RA	-0.515504	4.4051	-4.88073	5.9932e-05	0.00296053	1.54768
120	24	0	CUST_16224_PI428323385	CG2948	Probe	40677	rev7	CG2948 gene product from transcript CG2948-RA	-0.69511	8.83221	-4.87871	6.02368e-05	0.00297142	1.54268
308	115	0	CUST_2058_PI428323385	CG10890	Probe	3772069	mus201	mutagen-sensitive 201	-0.4117	10.3055	-4.87833	6.02933e-05	0.00297142	1.54176
1	76	0	CUST_30547_PI428323385	CG4820	Probe	41344	CG4820	CG4820 gene product from transcript CG4820-RB	0.616904	8.80562	4.87605	6.06392e-05	0.00298425	1.53612
7	163	0	CUST_9747_PI428323385	CG1506	Probe	35419	Ac3	CG1506 gene product from transcript CG1506-RA	-0.712168	7.13198	-4.87568	6.06951e-05	0.00298425	1.53521
356	109	0	CUST_1268_PI428323385	CG1058	Probe	40580	rpk	ripped pocket	-0.983589	8.19354	-4.8733	6.10598e-05	0.00299868	1.5293
38	7	0	CUST_20868_PI428323385	CG32811	Probe	318222	CG32811	CG32811 gene product from transcript CG32811-RB	-0.517765	6.17521	-4.87138	6.13542e-05	0.00300964	1.52456
309	109	0	CUST_31843_PI428323385	CG5414	Probe	39762	CG5414	CG5414 gene product from transcript CG5414-RB	-0.335003	10.4334	-4.87047	6.14943e-05	0.00301301	1.52231
227	47	0	CUST_29601_PI428323385	CG43946	Probe	NA	NA	NA	0.519127	8.79857	4.86796	6.18828e-05	0.00302333	1.5161
54	95	0	CUST_5850_PI428323385	CG12919	Probe	36054	egr	eiger	-0.580222	8.07226	-4.86793	6.18874e-05	0.00302333	1.51603
144	75	0	CUST_17767_PI428323385	CG31183	Probe	41927	CG31183	CG31183 gene product from transcript CG31183-RA	0.641713	6.22225	4.86772	6.19199e-05	0.00302333	1.51551
292	22	0	CUST_10349_PI428323385	CG15400	Probe	33476	CG15400	CG15400 gene product from transcript CG15400-RB	-0.903835	6.01605	-4.8668	6.20625e-05	0.00302613	1.51324
41	107	0	CUST_16595_PI428323385	CG30118	Probe	37119	CG30118	CG30118 gene product from transcript CG30118-RB	-0.372401	10.5969	-4.86642	6.21208e-05	0.00302613	1.51232
15	140	0	CUST_25994_PI428323385	CG42311	Probe	37038	grh	grainy head	0.693918	12.9156	4.86207	6.2803e-05	0.00305583	1.50155
37	156	0	CUST_27379_PI428323385	CG4271	Probe	33410	CG4271	CG4271 gene product from transcript CG4271-RA	-0.478335	4.69738	-4.85852	6.33651e-05	0.00307963	1.49277
4	137	0	CUST_26779_PI428323385	CG42562	Probe	37008	CG42562	CG42562 gene product from transcript CG42562-RA	0.565787	6.84031	4.85714	6.35848e-05	0.00308251	1.48936
71	88	0	CUST_33841_PI428323385	CG6323	Probe	43241	Tsp97E	Tetraspanin 97E	-0.433271	9.02167	-4.85705	6.35993e-05	0.00308251	1.48913
198	26	0	CUST_12402_PI428323385	CG1732	Probe	43805	CG1732	CG1732 gene product from transcript CG1732-RA	-0.702021	4.8994	-4.85677	6.36436e-05	0.00308251	1.48845
255	62	0	CUST_13695_PI428323385	CG18069	Probe	43828	CaMKII	Calcium/calmodulin-dependent protein kinase II	-0.563064	11.0024	-4.85262	6.43095e-05	0.00311119	1.47819
28	105	0	CUST_21059_PI428323385	CG3307	Probe	41743	pr-set7	CG3307 gene product from transcript CG3307-RC	0.492211	8.05608	4.84856	6.49678e-05	0.00313944	1.46815
329	82	0	CUST_33900_PI428323385	CG6353	Probe	42551	CG6353	CG6353 gene product from transcript CG6353-RA	-0.450779	11.537	-4.84481	6.55812e-05	0.00316232	1.45889
12	48	0	CUST_27078_PI428323385	CG42665	Probe	39900	Exn	Ephexin	-0.418043	11.581	-4.84441	6.56469e-05	0.00316232	1.4579
306	62	0	CUST_38180_PI428323385	CG8229	Probe	35898	CG8229	CG8229 gene product from transcript CG8229-RE	-0.505005	8.05947	-4.84429	6.56662e-05	0.00316232	1.45761
85	86	0	CUST_29226_PI428323385	CG43741	Probe	NA	NA	NA	-0.584069	6.23308	-4.84089	6.62287e-05	0.00318578	1.4492
160	26	0	CUST_18794_PI428323385	CG31794	Probe	35215	Pax	Paxillin	0.436357	10.2483	4.837	6.68787e-05	0.00321338	1.43958
92	6	0	CUST_23224_PI428323385	CG34313	Probe	5740766	CG34313	CG34313 gene product from transcript CG34313-RA	0.49668	5.11765	4.83273	6.75997e-05	0.00324432	1.42901
331	83	0	CUST_3120_PI428323385	CG11372	Probe	33162	galectin	CG11372 gene product from transcript CG11372-RD	-0.421664	11.477	-4.83003	6.8059e-05	0.00326265	1.42234
106	16	0	CUST_13700_PI428323385	CG18069	Probe	43828	CaMKII	Calcium/calmodulin-dependent protein kinase II	-0.640072	10.9774	-4.82504	6.89165e-05	0.00330001	1.41
88	45	0	CUST_363_PI428323385	CG10158	Probe	33971	CG10158	CG10158 gene product from transcript CG10158-RA	0.484222	8.77543	4.82134	6.95587e-05	0.00332699	1.40086
159	155	0	CUST_10140_PI428323385	CG15258	Probe	34904	CG15258	CG15258 gene product from transcript CG15258-RA	0.851103	5.02711	4.81796	7.01522e-05	0.00334831	1.39249
53	90	0	CUST_33295_PI428323385	CG6098	Probe	34449	Lrr47	Leucine-rich repeat 47	0.439635	10.4504	4.81779	7.01809e-05	0.00334831	1.39209
304	92	0	CUST_40703_PI428323385	CG9351	Probe	41675	flfl	falafel	0.657977	7.95226	4.81744	7.02425e-05	0.00334831	1.39122
374	19	0	CUST_5406_PI428323385	CG12611	Probe	32798	Andorra	CG12611 gene product from transcript CG12611-RA	0.444395	4.5666	4.81263	7.10956e-05	0.00338514	1.37933
83	62	0	CUST_27872_PI428323385	CG4294	Probe	37579	CG4294	CG4294 gene product from transcript CG4294-RB	-0.519335	8.99337	-4.81098	7.13906e-05	0.00339356	1.37525
148	24	0	CUST_33981_PI428323385	CG6394	Probe	32836	GalNAc-T2	UDP-N-acetyl-alpha-D-galactosamine:polypeptide N-acetylgalactosaminyltransferase 2	0.504747	7.32029	4.81075	7.14331e-05	0.00339356	1.37466
331	98	0	CUST_3388_PI428323385	CG11500	Probe	50096	Spase12	Spase 12-subunit	0.355889	13.2337	4.80999	7.1569e-05	0.00339619	1.37279
68	2	0	CUST_16593_PI428323385	CG30118	Probe	37119	CG30118	CG30118 gene product from transcript CG30118-RB	-0.376757	10.5302	-4.80943	7.16686e-05	0.00339709	1.37142
49	79	0	CUST_25993_PI428323385	CG42311	Probe	37038	grh	grainy head	0.675141	13.0406	4.80785	7.19545e-05	0.00340681	1.3675
39	155	0	CUST_20855_PI428323385	CG32809	Probe	31121	CG32809	CG32809 gene product from transcript CG32809-RG	-0.508746	6.94891	-4.80132	7.31436e-05	0.00345923	1.35135
27	144	0	CUST_17645_PI428323385	CG31137	Probe	42880	twin	CG31137 gene product from transcript CG31137-RB	0.712118	7.45851	4.79821	7.3716e-05	0.0034824	1.34367
348	32	0	CUST_12432_PI428323385	CG17332	Probe	34997	VhaSFD	Vacuolar H[+]-ATPase SFD subunit	0.422293	10.672	4.7964	7.40517e-05	0.00349435	1.33919
187	6	0	CUST_19543_PI428323385	CG32172	Probe	43918	noe	CG32172 gene product from transcript CG32172-RC	-0.778467	10.4581	-4.79542	7.42344e-05	0.00349905	1.33677
85	112	0	CUST_30672_PI428323385	CG4859	Probe	37949	Mmp1	Matrix metalloproteinase 1	-0.527405	8.22428	-4.79182	7.49079e-05	0.00352625	1.32787
224	113	0	CUST_37539_PI428323385	CG7987	Probe	41768	CG7987	CG7987 gene product from transcript CG7987-RA	-0.395721	9.32879	-4.79145	7.49786e-05	0.00352625	1.32694
40	118	0	CUST_31153_PI428323385	CG5059	Probe	40278	CG5059	CG5059 gene product from transcript CG5059-RD	-0.571297	8.75156	-4.78616	7.5979e-05	0.00356932	1.31388
339	6	0	CUST_23570_PI428323385	CG34405	Probe	37981	NaCP60E	Na channel protein 60E	-0.533914	7.04353	-4.78126	7.69203e-05	0.00360952	1.30176
40	145	0	CUST_36270_PI428323385	CG7391	Probe	38872	Clk	Clock	-0.867289	4.92622	-4.77944	7.72731e-05	0.00362205	1.29725
344	78	0	CUST_38494_PI428323385	CG8367	Probe	36571	cg	combgap	0.569749	9.87449	4.77752	7.7646e-05	0.00363549	1.29251
74	111	0	CUST_6129_PI428323385	CG13073	Probe	39773	CG13073	CG13073 gene product from transcript CG13073-RB	-0.462647	4.8403	-4.77472	7.8193e-05	0.00365704	1.28559
286	114	0	CUST_39763_PI428323385	CG8929	Probe	37306	CG8929	CG8929 gene product from transcript CG8929-RA	-0.522685	11.4444	-4.77111	7.89053e-05	0.00368626	1.27666
236	28	0	CUST_36942_PI428323385	CG7722	Probe	36163	Spn47C	Serpin 47C	-0.862091	8.37641	-4.77021	7.90841e-05	0.00369053	1.27443
123	161	0	CUST_11341_PI428323385	CG16739	Probe	37307	CG16739	CG16739 gene product from transcript CG16739-RA	-0.63374	4.96123	-4.76913	7.92995e-05	0.0036965	1.27175
239	32	0	CUST_38497_PI428323385	CG8367	Probe	36571	cg	combgap	0.505401	9.73929	4.76649	7.98269e-05	0.00371698	1.26523
129	18	0	CUST_23877_PI428323385	CG3494	Probe	37903	CG3494	CG3494 gene product from transcript CG3494-RA	-0.824987	4.86339	-4.7616	8.08116e-05	0.00375867	1.25315
260	46	0	CUST_17263_PI428323385	CG3083	Probe	33493	Prx6005	Peroxiredoxin 6005	0.467008	11.6658	4.76037	8.10633e-05	0.00376483	1.25009
239	128	0	CUST_15907_PI428323385	CG2698	Probe	40945	CG2698	CG2698 gene product from transcript CG2698-RD	-0.452387	12.0807	-4.75979	8.118e-05	0.00376483	1.24867
187	125	0	CUST_39972_PI428323385	CG9027	Probe	36232	CG9027	CG9027 gene product from transcript CG9027-RD	0.339821	12.9233	4.75964	8.12117e-05	0.00376483	1.24829
95	89	0	CUST_39747_PI428323385	CG8922	Probe	32700	RpS5a	Ribosomal protein S5a	-0.407993	15.8305	-4.7562	8.19149e-05	0.00379326	1.2398
57	128	0	CUST_6081_PI428323385	CG13049	Probe	39788	CG13049	CG13049 gene product from transcript CG13049-RB	-0.804137	6.01471	-4.75432	8.23037e-05	0.00380658	1.23514
265	58	0	CUST_11395_PI428323385	CG16757	Probe	46194	Spn	Spinophilin	0.42396	7.37984	4.75394	8.23829e-05	0.00380658	1.23419
135	59	0	CUST_4433_PI428323385	CG12070	Probe	43662	Sap-r	Saposin-related	-0.427862	13.2456	-4.75228	8.27265e-05	0.00381827	1.23009
257	87	0	CUST_25309_PI428323385	CG4103	Probe	34876	l(2)35Bc	lethal (2) 35Bc	0.577083	9.30041	4.75093	8.30077e-05	0.00382706	1.22675
201	158	0	CUST_25990_PI428323385	CG42311	Probe	37038	grh	grainy head	0.695479	12.8958	4.7482	8.35786e-05	0.00384918	1.22
182	104	0	CUST_21964_PI428323385	CG33542	Probe	3346149	upd3	unpaired 3	-0.883682	4.78448	-4.74766	8.36925e-05	0.00385022	1.21866
135	30	0	CUST_17647_PI428323385	CG31137	Probe	42880	twin	CG31137 gene product from transcript CG31137-RB	0.820189	7.42707	4.74691	8.38494e-05	0.00385324	1.21682
[truncated: 1,920 more rows]

## Sheet: Genes 48h
SystematicName	Symbol	Genename	logFC	AveExpr	t	P.Value	adj.P.Val	B
[truncated: 1,488 more rows]
